# Supplementary material for: Differential quantification of isobaric phosphopeptides using data-independent acquisition mass spectrometry
Source: Royal Society of Chemistry journal article supplement (doi:10.1039/c6mb00385k), 2016-06-09
Supplement: c6mb00385k2.xlsx [file c6mb00385k2.xlsx]

## Sheet: Table S1
UniProt ID	Sequence	Modifications	phosphoRS Site Probabilities	q-Value	PEP
Q13451	NNEESPTATVAEQGEDITSK	S5(Phospho)	S(5): 100.0; T(7): 0.0; T(9): 0.0; T(18): 0.0; S(19): 0.0	0	6.68034e-18
B4DZG2	YLSADSGDADDSDADLGSAVK	S12(Phospho)	Y(1): 0.0; S(3): 0.0; S(6): 0.0; S(12): 100.0; S(18): 0.0	0	1.05747e-17
O60264	GGPEGVAAQAVASAASAGPADAEMEEIFDDASPGK	S32(Phospho)	S(13): 0.0; S(16): 0.0; S(32): 100.0	0	2.421e-17
Q6P1L5	NGSPTPAGSLGGGAVATAGGPGSR	S3(Phospho)	S(3): 100.0; T(5): 0.0; S(9): 0.0; T(17): 0.0; S(23): 0.0	0	1.276e-16
B2RMV2	KGSSGNASEVSVACLTER	S3(Phospho); C14(Carbamidomethyl)	S(3): 100.0; S(4): 0.0; S(8): 0.0; S(11): 0.0; T(16): 0.0	0	4.867e-16
B5BUC0	IQAAASTPTNATAASDANTGDR	T7(Phospho)	S(6): 0.1; T(7): 99.9; T(9): 0.0; T(12): 0.0; S(15): 0.0; T(19): 0.0	0	5.653e-16
A0A087WXM0	FAQSAPGSPLSSQPVLITVQR	S8(Phospho)	S(4): 0.0; S(8): 100.0; S(11): 0.0; S(12): 0.0; T(18): 0.0	0	9.017e-16
Q5VT52	SFNYSPNSSTSEVSSTSASK	S5(Phospho)	S(1): 0.0; Y(4): 0.0; S(5): 100.0; S(8): 0.0; S(9): 0.0; T(10): 0.0; S(11): 0.0; S(14): 0.0; S(15): 0.0; T(16): 0.0; S(17): 0.0; S(19): 0.0	0	1.089e-15
Q8NEJ9	LSSEDEEEDEAEDDQSEASGK	S3(Phospho)	S(2): 0.3; S(3): 99.7; S(16): 0.0; S(19): 0.0	0	1.669e-15
Q86VQ1	SAAGSPPAVAAAGSGNGAGGGGGVGCAPAAGAGR	S5(Phospho); C26(Carbamidomethyl)	S(1): 50.0; S(5): 50.0; S(14): 0.0	0	1.95e-15
A0A024RA27	NMGGPYGGGNYGPGGSGGSGGYGGR	S19(Phospho)	Y(6): 0.0; Y(11): 0.0; S(16): 0.0; S(19): 99.9; Y(22): 0.1	0	2.03e-15
Q5QPB1	MSPMGTASGSNSPTSDSASVQR	S2(Phospho)	S(2): 100.0; T(6): 0.0; S(8): 0.0; S(10): 0.0; S(12): 0.0; T(14): 0.0; S(15): 0.0; S(17): 0.0; S(19): 0.0	0	3.831e-15
Q12888	SDSPEIPFQAAAGPSDGLDASSPGNSFVGLR	S3(Phospho)	S(1): 50.0; S(3): 50.0; S(15): 0.0; S(21): 0.0; S(22): 0.0; S(26): 0.0	0	6.312e-15
B4DTD3	INKTSPVTASDPAGPSYAAATLQASSAASSASPVSR	T4(Phospho)	T(4): 93.6; S(5): 6.4; T(8): 0.0; S(10): 0.0; S(16): 0.0; Y(17): 0.0; T(21): 0.0; S(25): 0.0; S(26): 0.0; S(29): 0.0; S(30): 0.0; S(32): 0.0; S(35): 0.0	0	1.62e-14
B0AZQ4	GDVEGSQSQDEGEGSGESER	S8(Phospho)	S(6): 0.0; S(8): 100.0; S(15): 0.0; S(18): 0.0	0	1.64e-14
Q8NCF5	LGVADIIDCVVLTSSPEATETSQQLQLR	C9(Carbamidomethyl); S15(Phospho)	T(13): 0.0; S(14): 0.2; S(15): 99.8; T(19): 0.0; T(21): 0.0; S(22): 0.0	0	2.745e-14
Q53F19	AEAPAGPALGLPSPEAESGVDR	S13(Phospho)	S(13): 100.0; S(18): 0.0	0	2.845e-14
O95400	HSLDSDEEEDDDDGGSSK	S5(Phospho)	S(2): 0.0; S(5): 100.0; S(16): 0.0; S(17): 0.0	0	2.922e-14
P53999	ELVSSSSSGSDSDSEVDKK	S12(Phospho)	S(4): 0.0; S(5): 0.0; S(6): 0.0; S(7): 0.0; S(8): 0.0; S(10): 0.0; S(12): 100.0; S(14): 0.0	0	3.139e-14
Q8N6Z3	KSMSEDGGLQESNPCADDFVSASTADVSHTNLGTIR	S4(Phospho); C15(Carbamidomethyl)	S(2): 94.3; S(4): 5.7; S(12): 0.0; S(21): 0.0; S(23): 0.0; T(24): 0.0; S(28): 0.0; T(30): 0.0; T(34): 0.0	0	3.257e-14
P04049	SHSESASPSALSSSPNNLSPTGWSQPK	S19(Phospho)	S(1): 0.0; S(3): 0.0; S(5): 0.0; S(7): 0.0; S(9): 0.0; S(12): 0.0; S(13): 0.0; S(14): 0.0; S(19): 99.8; T(21): 0.2; S(24): 0.0	0	3.815e-14
C9JA69	QSSESDIESVIYTIEAVAK	S3(Phospho)	S(2): 0.0; S(3): 100.0; S(5): 0.0; S(9): 0.0; Y(12): 0.0; T(13): 0.0	0	3.899e-14
Q59FS7	AQAVSEEEEEEEGKSSSPK	S17(Phospho)	S(5): 0.0; S(15): 0.0; S(16): 0.1; S(17): 99.9	0	5.151e-14
B4E2N5	ALTDDSDENEEEDAFTDQK	S6(Phospho)	T(3): 0.0; S(6): 100.0; T(16): 0.0	0	5.487e-14
Q9Y4H2	SSEGGVGVGPGGGDEPPTSPR	S19(Phospho)	S(1): 0.0; S(2): 0.0; T(18): 0.1; S(19): 99.9	0	5.869e-14
P49840	TSSFAEPGGGGGGGGGGPGGSASGPGGTGGGK	S2(Phospho)	T(1): 33.3; S(2): 33.3; S(3): 33.3; S(21): 0.0; S(23): 0.0; T(28): 0.0	0	6.892e-14
E5RHJ2	SSGNSSSSGSGSGSTSAGSSSPGAR	S21(Phospho)	S(1): 0.0; S(2): 0.0; S(5): 0.0; S(6): 0.0; S(7): 0.0; S(8): 0.0; S(10): 0.0; S(12): 0.0; S(14): 0.0; T(15): 0.0; S(16): 0.0; S(19): 0.0; S(20): 0.0; S(21): 100.0	0	7.073e-14
P52756	GLVAAYSGDSDNEEELVER	S10(Phospho)	Y(6): 0.0; S(7): 0.0; S(10): 100.0	0	7.463e-14
A8K9K6	EELMSSDLEETAGSTSIPK	S6(Phospho)	S(5): 3.4; S(6): 96.6; T(11): 0.0; S(14): 0.0; T(15): 0.0; S(16): 0.0	0	8.527e-14
Q9P206	VTSLRSPGASVSSSLTSLCSSSSDPAPSDR	S6(Phospho); C19(Carbamidomethyl)	T(2): 6.1; S(3): 6.1; S(6): 87.9; S(10): 0.0; S(12): 0.0; S(13): 0.0; S(14): 0.0; T(16): 0.0; S(17): 0.0; S(20): 0.0; S(21): 0.0; S(22): 0.0; S(23): 0.0; S(28): 0.0	0	8.748e-14
P54105	FEEESKEPVADEEEEDSDDDVEPITEFR	S17(Phospho)	S(5): 0.0; S(17): 100.0; T(25): 0.0	0	8.987e-14
Q13610	EKLQEEGGGSDEEETGSPSEDGMQSAR	S10(Phospho)	S(10): 100.0; T(15): 0.0; S(17): 0.0; S(19): 0.0; S(25): 0.0	0	9.989e-14
B2RB95	ETEEQDSDSAEQGDPAGEGK	S7(Phospho)	T(2): 0.0; S(7): 96.1; S(9): 3.9	0	1.007e-13
Q9H8G2	ILEGDNGMDSDMEEEADDGSK	S10(Phospho)	S(10): 100.0; S(20): 0.0	0	1.009e-13
B3KT06	TIGGGDDSFNTFFSETGAGK	S8(Phospho)	T(1): 0.0; S(8): 100.0; T(11): 0.0; S(14): 0.0; T(16): 0.0	0	1.057e-13
Q8WXG6	GTLSDSEIETNSATSTIFGK	S4(Phospho)	T(2): 3.7; S(4): 96.3; S(6): 0.0; T(10): 0.0; S(12): 0.0; T(14): 0.0; S(15): 0.0; T(16): 0.0	0	1.112e-13
A0A087X0M4	KMLGEDSDEEEEMDTSER	S7(Phospho)	S(7): 100.0; T(15): 0.0; S(16): 0.0	0	1.146e-13
P13645	SGGGGGGGGCGGGGGVSSLR	S1(Phospho); C10(Carbamidomethyl)	S(1): 100.0; S(17): 0.0; S(18): 0.0	0	1.256e-13
F8W7U3	LTDEDFSPFGSGGGLFSGGK	S7(Phospho)	T(2): 0.0; S(7): 100.0; S(11): 0.0; S(17): 0.0	0	1.425e-13
A4LAA3	QSETVDQNSDSDEMLAILK	S9(Phospho)	S(2): 0.0; T(4): 0.0; S(9): 100.0; S(11): 0.0	0	1.599e-13
Q5TAQ8	VHDRSEEEEEEEEEEEEEQPR	S5(Phospho)	S(5): 100.0	0	1.785e-13
A0A024R2M8	SEAAAPHTDAGGGLSSDEEEGTSSQAEAAR	S15(Phospho); S16(Phospho)	S(1): 0.0; T(8): 0.0; S(15): 100.0; S(16): 100.0; T(22): 0.0; S(23): 0.0; S(24): 0.0	0	1.838e-13
P16989	SPVGSGAPQAAAPAPAAHVAGNPGGDAAPAATGTAAAASLATAAGSEDAEK	S1(Phospho)	S(1): 98.9; S(5): 1.1; T(32): 0.0; T(34): 0.0; S(39): 0.0; T(42): 0.0; S(46): 0.0	0	1.842e-13
Q9H4L5	QLMEQDASSSPSAQVIGLK	S10(Phospho)	S(8): 0.0; S(9): 2.9; S(10): 97.1; S(12): 0.0	0	1.883e-13
O15530	ANSFVGTAQYVSPELLTEK	S3(Phospho)	S(3): 100.0; T(7): 0.0; Y(10): 0.0; S(12): 0.0; T(17): 0.0	0	2.015e-13
A0A087WUT6	NKPGPNIESGNEDDDASFK	S9(Phospho)	S(9): 100.0; S(17): 0.0	0	2.075e-13
B4DNP0	FICVTPTTCSNTIDLPMSPR	C3(Carbamidomethyl); C9(Carbamidomethyl); S18(Phospho)	T(5): 0.0; T(7): 0.0; T(8): 0.0; S(10): 0.0; T(12): 0.0; S(18): 100.0	0	2.239e-13
Q8N6H7	HGTDLWIDNMSSAVPNHSPEK	S18(Phospho)	T(3): 0.0; S(11): 0.0; S(12): 0.0; S(18): 100.0	0	2.281e-13
A0A087WV66	MPCESSPPESADTPTSTR	C3(Carbamidomethyl); S6(Phospho)	S(5): 0.0; S(6): 100.0; S(10): 0.0; T(13): 0.0; T(15): 0.0; S(16): 0.0; T(17): 0.0	0	2.342e-13
P22059	MLAESDESGDEESVSQTDK	S5(Phospho); S8(Phospho)	S(5): 100.0; S(8): 100.0; S(13): 0.0; S(15): 0.0; T(17): 0.0	0	2.419e-13
F8W7U3	GLFSDEEDSEDLFSSQSASK	S4(Phospho)	S(4): 100.0; S(9): 0.0; S(14): 0.0; S(15): 0.0; S(17): 0.0; S(19): 0.0	0	2.434e-13
Q6R327	SQSFNTDTTTSGISSMSSSPSR	S3(Phospho)	S(1): 0.1; S(3): 99.9; T(6): 0.0; T(8): 0.0; T(9): 0.0; T(10): 0.0; S(11): 0.0; S(14): 0.0; S(15): 0.0; S(17): 0.0; S(18): 0.0; S(19): 0.0; S(21): 0.0	0	2.819e-13
O00264	IVRGDQPAASGDSDDDEPPPLPR	S13(Phospho)	S(10): 0.0; S(13): 100.0	0	2.932e-13
Q96AF9	VSSIDLEIDSLSSLLDDMTK	S3(Phospho)	S(2): 0.1; S(3): 99.9; S(10): 0.0; S(12): 0.0; S(13): 0.0; T(19): 0.0	0	2.968e-13
Q5H964	IQRPNTTQEGEEMETDMDVADVAMESSPGSSISMEHR	S27(Phospho)	T(6): 0.0; T(7): 0.0; T(15): 0.0; S(26): 2.7; S(27): 47.2; S(30): 0.2; S(31): 47.2; S(33): 2.7	0	3.225e-13
Q86U70	KMSGGSTMSSGGGNTNNSNSK	S3(Phospho)	S(3): 100.0; S(6): 0.0; T(7): 0.0; S(9): 0.0; S(10): 0.0; T(15): 0.0; S(18): 0.0; S(20): 0.0	0	3.561e-13
Q8IVT2	KSSTVATLQGTPDHGDPR	S3(Phospho)	S(2): 3.2; S(3): 96.7; T(4): 0.0; T(7): 0.0; T(11): 0.0	0	3.812e-13
P07900	EEKESEDKPEIEDVGSDEEEEKK	S16(Phospho)	S(5): 0.0; S(16): 100.0	0	3.85e-13
Q8NHG8	AYSGSDLPSSSSGGANGTAGGGGGAR	S3(Phospho)	Y(2): 4.3; S(3): 95.7; S(5): 0.0; S(9): 0.0; S(10): 0.0; S(11): 0.0; S(12): 0.0; T(18): 0.0	0	3.929e-13
P22059	MLAESDESGDEESVSQTDK	S8(Phospho)	S(5): 0.0; S(8): 99.9; S(13): 0.1; S(15): 0.0; T(17): 0.0	0	3.999e-13
Q8N9T8	AFVEDSEDEDGAGEGGSSLLQK	S6(Phospho)	S(6): 100.0; S(17): 0.0; S(18): 0.0	0	4.157e-13
B2RAR2	GEDVPSEEEEEEENGFEDR	S6(Phospho)	S(6): 100.0	0	4.265e-13
P85299	RHSVSEMTSCPEPQGFSDPPGQGPTGTFR	S3(Phospho); C10(Carbamidomethyl)	S(3): 100.0; S(5): 0.0; T(8): 0.0; S(9): 0.0; S(17): 0.0; T(25): 0.0; T(27): 0.0	0	4.551e-13
Q96NW4	RHTVEDAVVSQGPEAAGPLSTPQEVSASR	T3(Phospho)	T(3): 100.0; S(10): 0.0; S(20): 0.0; T(21): 0.0; S(26): 0.0; S(28): 0.0	0	4.635e-13
P15408	QEPLEEDSPSSSSAGLDK	S8(Phospho)	S(8): 99.9; S(10): 0.1; S(11): 0.0; S(12): 0.0; S(13): 0.0	0	4.81e-13
P16989	SPVGSGAPQAAAPAPAAHVAGNPGGDAAPAATGTAAAASLATAAGSEDAEKK	S46(Phospho)	S(1): 0.0; S(5): 0.0; T(32): 0.0; T(34): 0.0; S(39): 0.0; T(42): 0.0; S(46): 100.0	0	5.017e-13
A8K822	LQGTSSHSADTPEASLDSGEGPSGMASQGCPSASR	T11(Phospho); C30(Carbamidomethyl)	T(4): 0.0; S(5): 0.0; S(6): 0.0; S(8): 0.4; T(11): 99.6; S(15): 0.0; S(18): 0.0; S(23): 0.0; S(27): 0.0; S(32): 0.0; S(34): 0.0	0	5.465e-13
B4DY08	MESEGGADDSAEEGDLLDDDDNEDRGDDQVK	S10(Phospho)	S(3): 0.0; S(10): 100.0	0	5.726e-13
B2RAR2	KDDSDDDGGGWITPSNIK	S4(Phospho)	S(4): 100.0; T(13): 0.0; S(15): 0.0	0	5.731e-13
A0A024R637	TSSTCSNESLSVGGTSVTPR	T4(Phospho); C5(Carbamidomethyl); S6(Phospho)	T(1): 32.8; S(2): 32.8; S(3): 32.8; T(4): 1.7; S(6): 100.0; S(9): 0.0; S(11): 0.0; T(15): 0.0; S(16): 0.0; T(18): 0.0	0	5.776e-13
Q1ED39	YSVLNNDDYFADVSPLR	S14(Phospho)	Y(1): 0.0; S(2): 0.0; Y(9): 0.0; S(14): 100.0	0	5.808e-13
B4DDC8	KLEEVLSTEGAEENGNSDK	S7(Phospho)	S(7): 99.9; T(8): 0.1; S(17): 0.0	0	6.415e-13
E9PMS6	LPSPTSPFSSLSQDQAATSK	S6(Phospho)	S(3): 0.0; T(5): 0.0; S(6): 100.0; S(9): 0.0; S(10): 0.0; S(12): 0.0; T(18): 0.0; S(19): 0.0	0	6.437e-13
E9PEM5	VEGSPTEEANLPTELQDNSLSPAASEAGEK	S21(Phospho)	S(4): 0.0; T(6): 0.0; T(13): 0.0; S(19): 0.0; S(21): 100.0; S(25): 0.0	0	6.515e-13
B3KN82	EEPLSEEEPCTSTAIASPEK	S5(Phospho); C10(Carbamidomethyl)	S(5): 100.0; T(11): 0.0; S(12): 0.0; T(13): 0.0; S(17): 0.0	0	6.641e-13
Q09666	ASLGSLEGEAEAEASSPKGK	S16(Phospho)	S(2): 0.0; S(5): 0.0; S(15): 0.1; S(16): 99.9	0	6.844e-13
Q12873	METEADAPSPAPSLGER	S9(Phospho)	T(3): 0.0; S(9): 100.0; S(13): 0.0	0	7.013e-13
Q96F46	LALAGEGEACPLLGSPGAGR	C10(Carbamidomethyl); S15(Phospho)	S(15): 100.0	0	7.335e-13
O15061	SPAPGSPDEEGGAEAPAAGIR	S6(Phospho)	S(1): 0.0; S(6): 100.0	0	7.41e-13
Q53GG0	EGHSLEMENENLVENGADSDEDDNSFLK	S19(Phospho)	S(4): 0.0; S(19): 100.0; S(25): 0.0	0	7.443e-13
A8K940	AVPMAPAPASPGSSNDSSAR	S10(Phospho)	S(10): 100.0; S(13): 0.0; S(14): 0.0; S(17): 0.0; S(18): 0.0	0	7.612e-13
Q8WUI4	AQSSPAAPASLSAPEPASQAR	S3(Phospho)	S(3): 96.8; S(4): 3.2; S(10): 0.0; S(12): 0.0; S(18): 0.0	0	7.651e-13
B3KUF5	LPNLSSPSAEGPPGPPSGPAPR	S6(Phospho)	S(5): 0.0; S(6): 100.0; S(8): 0.0; S(17): 0.0	0	7.922e-13
Q08J23	AGEPNSPDAEEANSPDVTAGCDPAGVHPPR	S6(Phospho); C21(Carbamidomethyl)	S(6): 100.0; S(14): 0.0; T(18): 0.0	0	8.042e-13
I3L2B0	SEDPPGQEAGSEEEGSSASGLAK	S11(Phospho)	S(1): 0.0; S(11): 99.9; S(16): 0.1; S(17): 0.0; S(19): 0.0	0	8.062e-13
Q96MW1	AALLAQYADVTDEEDEADEKDDSGATTMNIGSDK	T11(Phospho)	Y(7): 0.1; T(11): 99.9; S(23): 0.0; T(26): 0.0; T(27): 0.0; S(32): 0.0	0	8.185e-13
D3DP75	KTSASDVTNIYPGDAGK	S3(Phospho)	T(2): 0.0; S(3): 100.0; S(5): 0.0; T(8): 0.0; Y(11): 0.0	0	8.445e-13
K7EL01	TWDDDSDPESETDPDAQAK	S6(Phospho)	T(1): 0.0; S(6): 99.9; S(10): 0.1; T(12): 0.0	0	8.478e-13
E9PMR6	SETIQDTDTQSLVGSPSTR	S15(Phospho)	S(1): 0.0; T(3): 0.0; T(7): 0.0; T(9): 0.0; S(11): 0.0; S(15): 99.9; S(17): 0.1; T(18): 0.0	0	8.509e-13
Q8N9K4	DPSSNDINGGMEPTPSTVSTPSPSADLLGLR	S22(Phospho)	S(3): 0.0; S(4): 0.0; T(14): 0.0; S(16): 0.0; T(17): 0.0; S(19): 0.0; T(20): 0.0; S(22): 93.8; S(24): 6.2	0	8.801e-13
C9JUG3	SPPGSGASTPVGPWDQAVQR	S1(Phospho)	S(1): 100.0; S(5): 0.0; S(8): 0.0; T(9): 0.0	0	9.143e-13
Q7L014	KWSLEDDDDDEDDPAEAEK	S3(Phospho)	S(3): 100.0	0	9.314e-13
A0A024R869	SVSKESVASMGADSGDDFASDGSSSR	S3(Phospho)	S(1): 0.2; S(3): 99.8; S(6): 0.0; S(9): 0.0; S(14): 0.0; S(20): 0.0; S(23): 0.0; S(24): 0.0; S(25): 0.0	0	9.635e-13
P49792	LPPTFFCGVCSDTDEDNGNGEDFQSELQK	C7(Carbamidomethyl); C10(Carbamidomethyl); S11(Phospho)	T(4): 0.0; S(11): 99.6; T(13): 0.4; S(25): 0.0	0	1.008e-12
Q9ULH7	MTNNEDSLSPTSSTLSNLELDAAEKDR	S9(Phospho)	T(2): 0.0; S(7): 5.0; S(9): 95.0; T(11): 0.0; S(12): 0.0; S(13): 0.0; T(14): 0.0; S(16): 0.0	0	1.018e-12
A0A075BPH5	AETSEGSGSAPAVPEASASPK	S19(Phospho)	T(3): 0.0; S(4): 0.0; S(7): 0.0; S(9): 0.0; S(17): 0.0; S(19): 100.0	0	1.079e-12
A0A024R3E4	QPPPLAPQSPQGGVMGGSNSNQQQQMR	S9(Phospho)	S(9): 100.0; S(18): 0.0; S(20): 0.0	0	1.106e-12
Q9H6F5	LQQGAGLESPQGQPEPGAASPQR	S20(Phospho)	S(9): 0.0; S(20): 100.0	0	1.11e-12
Q13200	APVQPQQSPAAAPGGTDEKPSGK	S8(Phospho)	S(8): 100.0; T(16): 0.0; S(21): 0.0	0	1.117e-12
P22059	TGSNISGASSDISLDEQYK	S3(Phospho)	T(1): 3.0; S(3): 97.0; S(6): 0.0; S(9): 0.0; S(10): 0.0; S(13): 0.0; Y(18): 0.0	0	1.236e-12
Q9NR48	SPPETSSQLAPNPLLLSSTTELIEEISESVGK	S1(Phospho)	S(1): 100.0; T(5): 0.0; S(6): 0.0; S(7): 0.0; S(17): 0.0; S(18): 0.0; T(19): 0.0; T(20): 0.0; S(27): 0.0; S(29): 0.0	0	1.303e-12
Q9HCN4	GTLDEEDEEADSDTDDIDHR	S12(Phospho)	T(2): 0.0; S(12): 100.0; T(14): 0.0	0	1.306e-12
Q9Y6D6	LSVSSNDTQESGNSSGPSPGAK	S5(Phospho)	S(2): 0.0; S(4): 0.3; S(5): 99.7; T(8): 0.0; S(11): 0.0; S(14): 0.0; S(15): 0.0; S(18): 0.0	0	1.309e-12
E9PMS6	EVAATEEDVTRLPSPTSPFSSLSQDQAATSK	S14(Phospho)	T(5): 0.0; T(10): 0.0; S(14): 100.0; T(16): 0.0; S(17): 0.0; S(20): 0.0; S(21): 0.0; S(23): 0.0; T(29): 0.0; S(30): 0.0	0	1.327e-12
B7ZL12	LMSLLTSPHQPPPPPPASASPSAVPNGPQSPK	S30(Phospho)	S(3): 0.0; T(6): 0.0; S(7): 0.0; S(18): 0.0; S(20): 0.0; S(22): 0.0; S(30): 100.0	0	1.398e-12
B4DZX7	VEEEQEADEEDVSEEEAESK	S13(Phospho)	S(13): 100.0; S(19): 0.0	0	1.403e-12
Q09666	GPAFNMASPESDFGINLK	S8(Phospho)	S(8): 100.0; S(11): 0.0	0	1.435e-12
Q96IF1	SSFASSSASDASKPSSPR	S16(Phospho)	S(1): 0.0; S(2): 0.0; S(5): 0.0; S(6): 0.0; S(7): 0.0; S(9): 0.0; S(12): 0.0; S(15): 2.2; S(16): 97.8	0	1.435e-12
P12270	GAILSEEELAAMSPTAAAVAK	S13(Phospho)	S(5): 0.0; S(13): 50.0; T(15): 50.0	0	1.444e-12
E9PFQ4	TSASEGNPYVSSTLSVPASPR	S19(Phospho)	T(1): 0.0; S(2): 0.0; S(4): 0.0; Y(9): 0.0; S(11): 0.0; S(12): 0.0; T(13): 0.0; S(15): 0.0; S(19): 100.0	0	1.454e-12
Q6FI30	HKSGSMEEDVDTSPGGDYYTSPSSPTSSSR	S3(Phospho)	S(3): 99.6; S(5): 0.4; T(12): 0.0; S(13): 0.0; Y(18): 0.0; Y(19): 0.0; T(20): 0.0; S(21): 0.0; S(23): 0.0; S(24): 0.0; T(26): 0.0; S(27): 0.0; S(28): 0.0; S(29): 0.0	0	1.508e-12
B2R6A3	SASSDTSEELNSQDSPPK	S3(Phospho)	S(1): 0.0; S(3): 100.0; S(4): 0.0; T(6): 0.0; S(7): 0.0; S(12): 0.0; S(15): 0.0	0	1.532e-12
Q9Y6D5	GSSLSGTDDGAQEVVKDILEDVVTSAIK	S3(Phospho)	S(2): 5.3; S(3): 94.7; S(5): 0.0; T(7): 0.0; T(24): 0.0; S(25): 0.0	0	1.661e-12
H0Y2V6	IRQPSVDLTDDDQTSSVPHSAISDIMSSDQETYSCKPHGR	S5(Phospho); C35(Carbamidomethyl)	S(5): 100.0; T(9): 0.0; T(14): 0.0; S(15): 0.0; S(16): 0.0; S(20): 0.0; S(23): 0.0; S(27): 0.0; S(28): 0.0; T(32): 0.0; Y(33): 0.0; S(34): 0.0	0	1.683e-12
B7Z2K7	AYSFCGTVEYMAPEVVNR	S3(Phospho); C5(Carbamidomethyl)	Y(2): 0.0; S(3): 100.0; T(7): 0.0; Y(10): 0.0	0	1.728e-12
F8W9S7	EVSSRPSTPGLSVVSGISATSEDIPNK	S4(Phospho)	S(3): 25.0; S(4): 25.0; S(7): 25.0; T(8): 25.0; S(12): 0.0; S(15): 0.0; S(18): 0.0; T(20): 0.0; S(21): 0.0	0	1.735e-12
Q96T23	VGSPLDYSLVDLPSTNGQSPGK	S3(Phospho); S19(Phospho)	S(3): 100.0; Y(7): 0.0; S(8): 0.0; S(14): 0.0; T(15): 0.0; S(19): 100.0	0	1.735e-12
Q63HN8	EAAEPLSEPKEDQEAAELLSEPEEESER	S20(Phospho)	S(7): 0.0; S(20): 100.0; S(26): 0.0	0	1.742e-12
B4DS13	SQSSDTEQQSPTSGGGK	S3(Phospho)	S(1): 0.0; S(3): 100.0; S(4): 0.0; T(6): 0.0; S(10): 0.0; T(12): 0.0; S(13): 0.0	0	1.788e-12
B4DFV1	RSDSASSEPVGIYQGFEK	S4(Phospho)	S(2): 0.0; S(4): 100.0; S(6): 0.0; S(7): 0.0; Y(13): 0.0	0	1.793e-12
B7ZLC9	ENSGPVENGVSDQEGEEQAR	S11(Phospho)	S(3): 0.0; S(11): 100.0	0	1.847e-12
F8W9S7	LQELESCSGLGSTSDDTDVR	C7(Carbamidomethyl); S12(Phospho)	S(6): 0.0; S(8): 0.0; S(12): 99.9; T(13): 0.1; S(14): 0.0; T(17): 0.0	0	1.895e-12
G1UI26	AGEEDEGEEDSDSDYEISAK	S11(Phospho)	S(11): 99.9; S(13): 0.1; Y(15): 0.0; S(18): 0.0	0	1.938e-12
P18615	SLSEQPVMDTATATEQAK	S3(Phospho)	S(1): 0.0; S(3): 100.0; T(10): 0.0; T(12): 0.0; T(14): 0.0	0	1.967e-12
A1L3A9	KASVVDPSTESSPAPQEGSEQPASPASPLSSR	S27(Phospho)	S(3): 0.0; S(8): 0.0; T(9): 0.0; S(11): 0.0; S(12): 0.0; S(19): 0.0; S(24): 0.0; S(27): 100.0; S(30): 0.0; S(31): 0.0	0	2.002e-12
H0YEG1	LLSSNEDDANILSSPTDR	S3(Phospho)	S(3): 100.0; S(4): 0.0; S(13): 0.0; S(14): 0.0; T(16): 0.0	0	2.049e-12
M0QZ22	AAFTTPDHAPLSPQSSVASSGSEQTEEQGSSR	S12(Phospho)	T(4): 0.0; T(5): 0.0; S(12): 100.0; S(15): 0.0; S(16): 0.0; S(19): 0.0; S(20): 0.0; S(22): 0.0; T(25): 0.0; S(30): 0.0; S(31): 0.0	0	2.052e-12
Q9NTI5	METVSNASSSSNPSSPGR	S15(Phospho)	T(3): 0.0; S(5): 0.0; S(8): 0.0; S(9): 0.0; S(10): 0.0; S(11): 0.0; S(14): 0.1; S(15): 99.9	0	2.079e-12
Q59FL8	TPLLSSLSATSNNSTVACIDR	S11(Phospho); C18(Carbamidomethyl)	T(1): 0.0; S(5): 0.0; S(6): 0.0; S(8): 0.0; T(10): 0.1; S(11): 99.7; S(14): 0.1; T(15): 0.0	0	2.113e-12
Q7Z3K6	SNTACDGDKESEVEDVETDSGNSPEDLRK	C5(Carbamidomethyl); S11(Phospho)	S(1): 0.0; T(3): 0.0; S(11): 100.0; T(18): 0.0; S(20): 0.0; S(23): 0.0	0	2.12e-12
A8K559	KSEAGHASSPDSEVTSLCQK	S9(Phospho); C18(Carbamidomethyl)	S(2): 0.0; S(8): 0.0; S(9): 100.0; S(12): 0.0; T(15): 0.0; S(16): 0.0	0	2.18e-12
B4DJ26	NGQGDAPPTPPPTPVDLELEWVLGK	T9(Phospho)	T(9): 100.0; T(13): 0.0	0	2.276e-12
Q96GM8	AADSDDGAVSAPAASDGGVSK	S4(Phospho)	S(4): 100.0; S(10): 0.0; S(15): 0.0; S(20): 0.0	0	2.315e-12
B7Z7F3	ENAAAESGSESSSQEATPEK	S7(Phospho)	S(7): 100.0; S(9): 0.0; S(11): 0.0; S(12): 0.0; S(13): 0.0; T(17): 0.0	0	2.326e-12
Q96DP0	KVTSPSSSSSSSSSDSESDDEADVSEVTPR	S18(Phospho)	T(3): 0.0; S(4): 0.0; S(6): 0.0; S(7): 0.0; S(8): 0.0; S(9): 0.0; S(10): 0.0; S(11): 0.0; S(12): 0.0; S(13): 0.0; S(14): 0.0; S(16): 0.0; S(18): 100.0; S(25): 0.0; T(28): 0.0	0	2.327e-12
Q5JSZ5	HIISATSLSTSPTELGSR	S11(Phospho)	S(4): 0.0; T(6): 0.0; S(7): 0.0; S(9): 0.0; T(10): 50.0; S(11): 50.0; T(13): 0.1; S(17): 0.0	0	2.343e-12
E9PMS6	CVACECDLGGSSSGAEVR	C1(Carbamidomethyl); C4(Carbamidomethyl); C6(Carbamidomethyl); S12(Phospho)	S(11): 0.1; S(12): 99.9; S(13): 0.1	0	2.357e-12
Q05CT8	LVTSGAESGNLNTSPSSNQTR	S14(Phospho)	T(3): 0.0; S(4): 0.0; S(8): 0.0; T(13): 0.2; S(14): 99.8; S(16): 0.0; S(17): 0.0; T(20): 0.0	0	2.403e-12
Q86XZ4	CSSVTSVSLSSPSDASAASSSTCASPPSLTSANKK	C1(Carbamidomethyl); S3(Phospho); C23(Carbamidomethyl)	S(2): 8.2; S(3): 91.8; T(5): 0.0; S(6): 0.0; S(8): 0.0; S(10): 0.0; S(11): 0.0; S(13): 0.0; S(16): 0.0; S(19): 0.0; S(20): 0.0; S(21): 0.0; T(22): 0.0; S(25): 0.0; S(28): 0.0; T(30): 0.0; S(31): 0.0	0	2.464e-12
Q9UK58	LSPTPSMQDGLDLPSETDLR	S2(Phospho)	S(2): 100.0; T(4): 0.0; S(6): 0.0; S(15): 0.0; T(17): 0.0	0	2.561e-12
Q59FP7	EADDDEEVDDNIPEMPSPK	S17(Phospho)	S(17): 100.0	0	2.615e-12
Q9Y4W2	MEVGPFSTGQESPTAENAR	S12(Phospho)	S(7): 0.0; T(8): 0.0; S(12): 100.0; T(14): 0.0	0	2.695e-12
Q9NVF7	EVMESAVGNSSGSGQNEESPR	S19(Phospho)	S(5): 0.0; S(10): 0.0; S(11): 0.0; S(13): 0.0; S(19): 100.0	0	2.899e-12
O60271	LHQLSGSDQLESTAHSR	S5(Phospho)	S(5): 100.0; S(7): 0.0; S(12): 0.0; T(13): 0.0; S(16): 0.0	0	2.931e-12
Q9ULH0	LPSDEDESGTEESDNTPLLK	S8(Phospho)	S(3): 0.0; S(8): 100.0; T(10): 0.0; S(13): 0.0; T(16): 0.0	0	2.999e-12
O14646	KSSVSDAPVHITASGEPVPISEESEELDQK	S3(Phospho)	S(2): 5.4; S(3): 94.2; S(5): 0.3; T(12): 0.0; S(14): 0.0; S(21): 0.0; S(24): 0.0	0	3.009e-12
B4DHL7	GSDALSETSSVSHIEDLEK	S6(Phospho)	S(2): 0.0; S(6): 100.0; T(8): 0.0; S(9): 0.0; S(10): 0.0; S(12): 0.0	0	3.083e-12
B4E2K7	ENYSDSEEEDDDDVASSR	S6(Phospho)	Y(3): 0.0; S(4): 0.0; S(6): 100.0; S(16): 0.0; S(17): 0.0	0	3.139e-12
Q5T4S7	TGSTSSKEDDYESDAATIVQK	S3(Phospho)	T(1): 2.7; S(3): 97.2; T(4): 0.1; S(5): 0.0; S(6): 0.0; Y(11): 0.0; S(13): 0.0; T(17): 0.0	0	3.158e-12
Q9BY89	LSSLSSQTEPTSAGDQYDCSR	S3(Phospho); C19(Carbamidomethyl)	S(2): 0.2; S(3): 99.8; S(5): 0.0; S(6): 0.0; T(8): 0.0; T(11): 0.0; S(12): 0.0; Y(17): 0.0; S(20): 0.0	0	3.223e-12
B4DP61	GTGQSDDSDIWDDTALIK	S5(Phospho)	T(2): 0.0; S(5): 100.0; S(8): 0.0; T(14): 0.0	0	3.321e-12
A8K9A4	SAAEMYGSVTEHPSPSPLLSSSFDLDYDFQR	S14(Phospho)	S(1): 0.0; Y(6): 0.0; S(8): 0.0; T(10): 0.0; S(14): 93.4; S(16): 6.6; S(20): 0.0; S(21): 0.0; S(22): 0.0; Y(27): 0.0	0	3.46e-12
P13051	HAPSPEPAVQGTGVAGVPEESGDAAAIPAKK	S4(Phospho)	S(4): 100.0; T(12): 0.0; S(21): 0.0	0	3.461e-12
Q59GB6	TVKPVENKDDDDSIADFLNSDEEEDR	S20(Phospho)	T(1): 0.0; S(13): 0.0; S(20): 100.0	0	3.467e-12
Q6ZMY0	KSSADTEFSDECTTAER	S3(Phospho); C12(Carbamidomethyl)	S(2): 0.0; S(3): 100.0; T(6): 0.0; S(9): 0.0; T(13): 0.0; T(14): 0.0	0	3.557e-12
B4DKT9	TPEELDDSDFETEDFDVR	S8(Phospho)	T(1): 0.0; S(8): 100.0; T(12): 0.0	0	3.713e-12
Q15149	TQLASWSDPTEETGPVAGILDTETLEK	S5(Phospho)	T(1): 0.3; S(5): 99.5; S(7): 0.3; T(10): 0.0; T(13): 0.0; T(22): 0.0; T(24): 0.0	0	3.73e-12
Q5H909	HLDGEEDGSSDQSQASGTTGGR	S9(Phospho)	S(9): 99.9; S(10): 0.1; S(13): 0.0; S(16): 0.0; T(18): 0.0; T(19): 0.0	0	3.762e-12
M0QYL4	VDSEGDFSENDDAAGDFR	S3(Phospho); S8(Phospho)	S(3): 100.0; S(8): 100.0	0	3.808e-12
Q7KZ85	KMSDDEDDDEEEYGKEEHEK	S3(Phospho)	S(3): 100.0; Y(13): 0.0	0	3.818e-12
Q86YS7	SQSESSDEVTELDLSHGK	S3(Phospho)	S(1): 0.0; S(3): 100.0; S(5): 0.0; S(6): 0.0; T(10): 0.0; S(15): 0.0	0	3.822e-12
E9PS08	YGGSVGSQPPPVAPEPGPVPSSPSQEPPTKR	S21(Phospho)	Y(1): 0.0; S(4): 0.0; S(7): 0.0; S(21): 99.8; S(22): 0.2; S(24): 0.0; T(29): 0.0	0	3.825e-12
Q96MW1	KAALLAQYADVTDEEDEADEKDDSGATTMNIGSDK	T12(Phospho)	Y(8): 0.0; T(12): 100.0; S(24): 0.0; T(27): 0.0; T(28): 0.0; S(33): 0.0	0	3.912e-12
H0YB24	SVASNQSEMEFSSLQDMPK	S4(Phospho)	S(1): 0.0; S(4): 100.0; S(7): 0.0; S(12): 0.0; S(13): 0.0	0	3.952e-12
Q9Y2W1	FSGEEGEIEDDESGTENR	S13(Phospho)	S(2): 0.0; S(13): 100.0; T(15): 0.0	0	3.956e-12
F5H5U2	KREEGSDIEDEDMEELLNDTR	S6(Phospho)	S(6): 100.0; T(20): 0.0	0	3.966e-12
Q8WU20	LTSTSTSDTQNINNSAQR	S3(Phospho)	T(2): 0.0; S(3): 100.0; T(4): 0.0; S(5): 0.0; T(6): 0.0; S(7): 0.0; T(9): 0.0; S(15): 0.0	0	4.103e-12
B2R8R5	STAPSAAASASASAAASSPAGGGAEALELLEHCGVCR	S18(Phospho); C33(Carbamidomethyl); C36(Carbamidomethyl)	S(1): 0.0; T(2): 0.0; S(5): 0.0; S(9): 0.0; S(11): 0.0; S(13): 0.0; S(17): 50.0; S(18): 50.0	0	4.128e-12
Q32MZ4	CTLPEHESPSQDISDACEAESTER	C1(Carbamidomethyl); S8(Phospho); C17(Carbamidomethyl)	T(2): 0.0; S(8): 95.1; S(10): 4.9; S(14): 0.0; S(21): 0.0; T(22): 0.0	0	4.233e-12
A0A087X0M4	MLGEDSDEEEEMDTSER	S6(Phospho)	S(6): 100.0; T(14): 0.0; S(15): 0.0	0	4.281e-12
B3KMY8	QISSSSTGCLSSPNATVQSPK	S4(Phospho); C9(Carbamidomethyl)	S(3): 0.0; S(4): 96.7; S(5): 3.3; S(6): 0.0; T(7): 0.0; S(11): 0.0; S(12): 0.0; T(16): 0.0; S(19): 0.0	0	4.395e-12
Q9UHB7	NSYNNSQAPSPGLGSK	S10(Phospho)	S(2): 0.0; Y(3): 0.0; S(6): 0.0; S(10): 100.0; S(15): 0.0	0	4.583e-12
Q5H924	AQCETLSPDGLPEEQPQTTK	C3(Carbamidomethyl); S7(Phospho)	T(5): 0.0; S(7): 100.0; T(18): 0.0; T(19): 0.0	0	4.601e-12
Q12888	SPEPEVLSTQEDLFDQSNK	S1(Phospho)	S(1): 100.0; S(8): 0.0; T(9): 0.0; S(17): 0.0	0	4.607e-12
A8K1J3	EDKSPSEESAPTTSPESVSGSVPSSGSSGR	S4(Phospho)	S(4): 99.7; S(6): 0.3; S(9): 0.0; T(12): 0.0; T(13): 0.0; S(14): 0.0; S(17): 0.0; S(19): 0.0; S(21): 0.0; S(24): 0.0; S(25): 0.0; S(27): 0.0; S(28): 0.0	0	4.636e-12
Q9NRR3	IDRSMIGEPTNFVHTAHVGSGDLFSGMNSVSSIQNQMQSK	S4(Phospho)	S(4): 99.9; T(10): 0.1; T(15): 0.0; S(20): 0.0; S(25): 0.0; S(29): 0.0; S(31): 0.0; S(32): 0.0; S(39): 0.0	0	4.64e-12
Q5H924	REESPMDVDQPSPSAQDTQSIASDGTPQGEK	S4(Phospho); S12(Phospho)	S(4): 100.0; S(12): 100.0; S(14): 0.0; T(18): 0.0; S(20): 0.0; S(23): 0.0; T(26): 0.0	0	4.67e-12
J3KP58	VQAEDEANGLQTTPASR	S16(Phospho)	T(12): 0.0; T(13): 0.0; S(16): 100.0	0	4.698e-12
E7ESM9	KEGITGPPADSSKPIGPDDAIDALSSDFTCGSPTAAGK	C30(Carbamidomethyl); S32(Phospho)	T(5): 0.0; S(11): 0.0; S(12): 0.0; S(25): 0.0; S(26): 0.0; T(29): 0.0; S(32): 100.0; T(34): 0.0	0	4.765e-12
Q9NYF8	FNDSEGDDTEETEDYR	S4(Phospho)	S(4): 100.0; T(9): 0.0; T(12): 0.0; Y(15): 0.0	0	4.967e-12
A0A024R6D1	HCDSINSDFGSESGGCGDSSPGPSASQGPR	C2(Carbamidomethyl); C16(Carbamidomethyl); S20(Phospho)	S(4): 0.0; S(7): 0.0; S(11): 0.0; S(13): 0.0; S(19): 6.6; S(20): 93.4; S(24): 0.0; S(26): 0.0	0	5.107e-12
A0A087WUT6	INSSGESGDESDEFLQSR	S3(Phospho)	S(3): 100.0; S(4): 0.0; S(7): 0.0; S(11): 0.0; S(17): 0.0	0	5.119e-12
P11388	IKNENTEGSPQEDGVELEGLK	S9(Phospho)	T(6): 0.0; S(9): 100.0	0	5.19e-12
B7Z8Z8	KPGDGEVSPSTEDAPFQHSPLGK	S8(Phospho)	S(8): 100.0; S(10): 0.0; T(11): 0.0; S(19): 0.0	0	5.219e-12
Q7Z417	TIQNSSVSPTSSSSSSSSTGETQTQSSSR	S6(Phospho)	T(1): 0.0; S(5): 4.6; S(6): 90.6; S(8): 4.6; T(10): 0.2; S(11): 0.0; S(12): 0.0; S(13): 0.0; S(14): 0.0; S(15): 0.0; S(16): 0.0; S(17): 0.0; S(18): 0.0; T(19): 0.0; T(22): 0.0; T(24): 0.0; S(26): 0.0; S(27): 0.0; S(28): 0.0	0	5.287e-12
B4DF30	LESLYSDEEDESAVGADK	S6(Phospho)	S(3): 0.0; Y(5): 0.0; S(6): 100.0; S(12): 0.0	0	5.323e-12
Q5TAQ8	TDLANGSLSSSPEEMSGAEEGR	S16(Phospho)	T(1): 0.0; S(7): 0.0; S(9): 0.0; S(10): 0.0; S(11): 0.0; S(16): 100.0	0	5.451e-12
Q96SR7	WKAEGHSDDESDSEGSDSESTSR	S7(Phospho)	S(7): 100.0; S(11): 0.0; S(13): 0.0; S(16): 0.0; S(18): 0.0; S(20): 0.0; T(21): 0.0; S(22): 0.0	0	5.617e-12
Q9H4L7	KLSSSSEPYEEDEFNDDQSIKK	S3(Phospho)	S(3): 91.7; S(4): 4.2; S(5): 4.2; S(6): 0.0; Y(9): 0.0; S(19): 0.0	0	5.628e-12
E9PRM3	SNCLGTDEDSQDSSDGIPSAPR	S1(Phospho); C3(Carbamidomethyl)	S(1): 100.0; T(6): 0.0; S(10): 0.0; S(13): 0.0; S(14): 0.0; S(19): 0.0	0	5.653e-12
B4DDB6	SSGSPYGGGYGSGGGSGGYGSR	S4(Phospho)	S(1): 0.0; S(2): 0.0; S(4): 100.0; Y(6): 0.0; Y(10): 0.0; S(12): 0.0; S(16): 0.0; Y(19): 0.0; S(21): 0.0	0	5.668e-12
O75691	SLSDNGQPGTPDPADSGGTSAK	T10(Phospho)	S(1): 0.0; S(3): 0.0; T(10): 100.0; S(16): 0.0; T(19): 0.0; S(20): 0.0	0	5.696e-12
B4DDR0	EAANEAGDSSQDEAEDDVK	S9(Phospho); S10(Phospho)	S(9): 100.0; S(10): 100.0	0	5.767e-12
Q5T0W9	LCSSSDTLVSEGEENQKPK	C2(Carbamidomethyl); S3(Phospho)	S(3): 100.0; S(4): 0.0; S(5): 0.0; T(7): 0.0; S(10): 0.0	0	5.886e-12
Q9Y446	LSSGFDDIDLPSAVK	S3(Phospho)	S(2): 0.0; S(3): 100.0; S(12): 0.0	0	6.032e-12
B4DQF7	KDSEEEVSLLGSQDIEEGNHQVEDGCR	S3(Phospho); C26(Carbamidomethyl)	S(3): 100.0; S(8): 0.0; S(12): 0.0	0	6.095e-12
Q02952	GLAEVQQDGEAEEGATSDGEK	S17(Phospho)	T(16): 0.0; S(17): 100.0	0	6.106e-12
P13645	GSLGGGFSSGGFSGGSFSR	S16(Phospho)	S(2): 0.0; S(8): 0.0; S(9): 0.0; S(13): 0.0; S(16): 100.0; S(18): 0.0	0	6.233e-12
Q9NRY4	AQSNGSGNGSDSEMDTSSLER	S10(Phospho)	S(3): 0.0; S(6): 0.0; S(10): 99.7; S(12): 0.3; T(16): 0.0; S(17): 0.0; S(18): 0.0	0	6.39e-12
Q13442	KSLDSDESEDEEDDYQQK	S5(Phospho)	S(2): 0.0; S(5): 100.0; S(8): 0.0; Y(15): 0.0	0	6.394e-12
A0A087WWC4	QKEENNTDLPYLEESTLTTAALSPSK	S23(Phospho)	T(7): 0.0; Y(11): 0.0; S(15): 0.0; T(16): 0.0; T(18): 0.0; T(19): 0.0; S(23): 50.0; S(25): 50.0	0	6.428e-12
B4DZI4	HIVSNDSSDSDDESHEPK	S10(Phospho)	S(4): 0.0; S(7): 0.0; S(8): 0.0; S(10): 100.0; S(14): 0.0	0	6.646e-12
Q9BUT9	RAPSTSPSFEGTQETYTVAHEENVR	S8(Phospho)	S(4): 0.0; T(5): 0.0; S(6): 0.2; S(8): 99.6; T(12): 0.2; T(15): 0.0; Y(16): 0.0; T(17): 0.0	0	6.719e-12
Q9NZ63	RRGDSESEEDEQDSEEVR	S5(Phospho)	S(5): 100.0; S(7): 0.0; S(14): 0.0	0	6.924e-12
Q4LE74	KKPGDASSLPDAGLSPGSQVDSK	S15(Phospho)	S(7): 0.0; S(8): 0.0; S(15): 100.0; S(18): 0.0; S(22): 0.0	0	6.929e-12
B7Z6F7	RLSAQGQAISVVGSLSSMSPLEEEAPQAK	S3(Phospho)	S(3): 100.0; S(10): 0.0; S(14): 0.0; S(16): 0.0; S(17): 0.0; S(19): 0.0	0	7e-12
M0QXN6	TNSDSALHQSTMTPTQPESFSSGSQDVHQK	S3(Phospho)	T(1): 6.0; S(3): 87.9; S(5): 6.0; S(10): 0.0; T(11): 0.0; T(13): 0.0; T(15): 0.0; S(19): 0.0; S(21): 0.0; S(22): 0.0; S(24): 0.0	0	7.279e-12
Q96ST3	GDLSDVEEEEEEEMDVDEATGAVKK	S4(Phospho)	S(4): 100.0; T(20): 0.0	0	7.416e-12
A0A087X176	DNLLDTYSADQGDSSEGGTLAR	S14(Phospho)	T(6): 0.0; Y(7): 0.0; S(8): 0.0; S(14): 96.9; S(15): 3.1; T(19): 0.0	0	7.419e-12
O15061	TPQGPVSATVEVSSPTGFAQSQVLEDVSQAAR	S13(Phospho)	T(1): 0.0; S(7): 0.0; T(9): 0.0; S(13): 49.8; S(14): 49.8; T(16): 0.3; S(21): 0.0; S(28): 0.0	0	7.508e-12
Q13442	SLDSDESEDEEDDYQQK	S7(Phospho)	S(1): 0.0; S(4): 0.0; S(7): 100.0; Y(14): 0.0	0	7.712e-12
Q96T88	DSELSDTDSGCCLGQSESDK	S5(Phospho); C11(Carbamidomethyl); C12(Carbamidomethyl)	S(2): 0.0; S(5): 100.0; T(7): 0.0; S(9): 0.0; S(16): 0.0; S(18): 0.0	0	7.87e-12
O95425	YQTQPVTLGEVEQVQSGK	T3(Phospho)	Y(1): 0.1; T(3): 99.9; T(7): 0.0; S(16): 0.0	0	7.901e-12
A0A024R637	TSSTCSNESLSVGGTSVTPR	S3(Phospho); C5(Carbamidomethyl)	T(1): 2.1; S(2): 2.1; S(3): 47.9; T(4): 47.9; S(6): 0.0; S(9): 0.0; S(11): 0.0; T(15): 0.0; S(16): 0.0; T(18): 0.0	0	8.125e-12
Q13595	RAHTPTPGIYMGRPTHSGGGGGGGGGGGGGGGGR	T6(Phospho)	T(4): 50.0; T(6): 50.0; Y(10): 0.0; T(15): 0.0; S(17): 0.0	0	8.214e-12
P55081	IVEPEVVGESDSEVEGDAWR	S12(Phospho)	S(10): 0.0; S(12): 100.0	0	8.286e-12
Q8IXQ3	KIDAGTMAEPSASPSK	S13(Phospho)	T(6): 0.0; S(11): 0.0; S(13): 97.8; S(15): 2.2	0	8.347e-12
H7C0E8	GVTQEVDGLSQTDGTLTYFDK	S10(Phospho)	T(3): 0.0; S(10): 99.9; T(12): 0.1; T(15): 0.0; T(17): 0.0; Y(18): 0.0	0	8.718e-12
Q86VX9	AESPTPGMAQGMEPGAGQEGAMFVHAR	S3(Phospho)	S(3): 100.0; T(5): 0.0	0	8.855e-12
Q5JRA6	WSAEASGKPSPSDPGSGTATMMNSSSR	S25(Phospho)	S(2): 0.0; S(6): 0.0; S(10): 0.0; S(12): 0.0; S(16): 0.0; T(18): 0.0; T(20): 0.0; S(24): 33.3; S(25): 33.3; S(26): 33.3	0	9.037e-12
Q9NWG8	SVSSFPVPQDNVDTHPGSGK	S1(Phospho)	S(1): 100.0; S(3): 0.0; S(4): 0.0; T(14): 0.0; S(18): 0.0	0	9.136e-12
A0A024RA66	ASNTSTPTKGNTETSASASQTNHVK	T6(Phospho)	S(2): 0.0; T(4): 0.0; S(5): 4.2; T(6): 91.7; T(8): 4.2; T(12): 0.0; T(14): 0.0; S(15): 0.0; S(17): 0.0; S(19): 0.0; T(21): 0.0	0	9.353e-12
B4DDR0	EAANEAGDSSQDEAEDDVK	S10(Phospho)	S(9): 4.1; S(10): 95.9	0	9.365e-12
Q6P2E9	SPDVISSASTALSQDIPEIASEALSR	S1(Phospho)	S(1): 100.0; S(6): 0.0; S(7): 0.0; S(9): 0.0; T(10): 0.0; S(13): 0.0; S(21): 0.0; S(25): 0.0	0	9.453e-12
B3KP06	QNSPVTQDGIQESPWQDR	S3(Phospho)	S(3): 100.0; T(6): 0.0; S(13): 0.0	0	9.497e-12
Q9UHV7	KYSASSGGLCEEATAAK	S3(Phospho); C10(Carbamidomethyl)	Y(2): 0.0; S(3): 100.0; S(5): 0.0; S(6): 0.0; T(14): 0.0	0	9.623e-12
A8KAQ3	YSVLQQHAEANGVDGVDALDTASHTNK	S2(Phospho)	Y(1): 94.9; S(2): 5.1; T(21): 0.0; S(23): 0.0; T(25): 0.0	0	9.636e-12
H3BRF9	LPDSDDDEDEETAIQR	S4(Phospho)	S(4): 100.0; T(12): 0.0	0	9.683e-12
D6PAV9	SAFTPATATGSSPSPVLGQGEK	S14(Phospho)	S(1): 0.0; T(4): 0.0; T(7): 0.0; T(9): 0.0; S(11): 0.0; S(12): 0.0; S(14): 100.0	0	1.002e-11
A0A024R776	ELSVQDQPSLSPTSLQNSSSHTTTAK	S11(Phospho)	S(3): 0.0; S(9): 0.0; S(11): 99.7; T(13): 0.3; S(14): 0.0; S(18): 0.0; S(19): 0.0; S(20): 0.0; T(22): 0.0; T(23): 0.0; T(24): 0.0	0	1.003e-11
Q04656	VSITSEVESTSNSPSSSSLQK	S13(Phospho)	S(2): 0.0; T(4): 0.0; S(5): 0.0; S(9): 0.0; T(10): 0.0; S(11): 0.0; S(13): 99.5; S(15): 0.1; S(16): 0.1; S(17): 0.0; S(18): 0.1	0	1.019e-11
A0A087WXV6	KASATCSSATAAASSGLEEWTSRSPR	C6(Carbamidomethyl); S24(Phospho)	S(3): 0.0; T(5): 0.0; S(7): 0.0; S(8): 0.0; T(10): 0.0; S(14): 0.0; S(15): 0.0; T(21): 0.3; S(22): 5.0; S(24): 94.7	0	1.03e-11
Q96JM3	KPSPSESPEPWKPFPAVSPEPR	S3(Phospho)	S(3): 99.8; S(5): 0.2; S(7): 0.0; S(18): 0.0	0	1.047e-11
B7Z5R7	QSSGSATNVASTPDNR	S2(Phospho)	S(2): 100.0; S(3): 0.0; S(5): 0.0; T(7): 0.0; S(11): 0.0; T(12): 0.0	0	1.078e-11
F8W9S7	TSPSDGAMANYESTEVMGDGESAHDSPR	S2(Phospho)	T(1): 50.0; S(2): 50.0; S(4): 0.0; Y(11): 0.0; S(13): 0.0; T(14): 0.0; S(22): 0.0; S(26): 0.0	0	1.09e-11
B4DMF7	ARSMDSSDLSDGAVTLQEYLELKK	S3(Phospho)	S(3): 92.1; S(6): 4.0; S(7): 4.0; S(10): 0.0; T(15): 0.0; Y(19): 0.0	0	1.091e-11
O95218	YKLDEDEDEDDADLSKYNLDASEEEDSNK	S22(Phospho)	Y(1): 0.0; S(15): 0.0; Y(17): 0.0; S(22): 100.0; S(27): 0.0	0	1.096e-11
Q4LE79	SSSFSDTLEESSPIAAIFDTENLEK	S2(Phospho)	S(1): 48.6; S(2): 48.6; S(3): 2.8; S(5): 0.0; T(7): 0.0; S(11): 0.0; S(12): 0.0; T(20): 0.0	0	1.1e-11
B4DZC3	KAEDSDSEPEPEDNVR	S5(Phospho)	S(5): 100.0; S(7): 0.0	0	1.112e-11
F1T0K4	WDSDNDEENEDVPISMK	S3(Phospho)	S(3): 100.0; S(15): 0.0	0	1.119e-11
P13645	ISSSKGSLGGGFSSGGFSGGSFSR	S3(Phospho)	S(2): 0.2; S(3): 95.3; S(4): 4.3; S(7): 0.2; S(13): 0.0; S(14): 0.0; S(18): 0.0; S(21): 0.0; S(23): 0.0	0	1.134e-11
P06748	CGSGPVHISGQHLVAVEEDAESEDEEEEDVK	C1(Carbamidomethyl); S22(Phospho)	S(3): 0.0; S(9): 0.0; S(22): 100.0	0	1.144e-11
P11388	NENTEGSPQEDGVELEGLK	S7(Phospho)	T(4): 0.0; S(7): 100.0	0	1.149e-11
Q53H75	TRPGSFQSLSDALSDTPAK	S5(Phospho)	T(1): 0.0; S(5): 100.0; S(8): 0.0; S(10): 0.0; S(14): 0.0; T(16): 0.0	0	1.151e-11
A2NX49	FIIGSVSEDNSEDEISNLVK	S11(Phospho)	S(5): 0.0; S(7): 0.0; S(11): 100.0; S(16): 0.0	0	1.189e-11
A8KAH7	GDSESEEDEDLEVPVPSR	S3(Phospho)	S(3): 100.0; S(5): 0.0; S(17): 0.0	0	1.203e-11
A0A087WZ13	EALGLGPPAAQLTPPPAPVGLR	T13(Phospho)	T(13): 100.0	0	1.225e-11
F8WBL2	MPQDGSDDEDEEWPTLEK	S6(Phospho)	S(6): 100.0; T(15): 0.0	0	1.259e-11
B3KNC0	ALASNTSFFSGCSPIEEEAH	C12(Carbamidomethyl); S13(Phospho)	S(4): 0.0; T(6): 0.0; S(7): 0.0; S(10): 3.8; S(13): 96.2	0	1.269e-11
A0A024R7G6	STPSHGSVSSLNSTGSLSPK	S18(Phospho)	S(1): 0.0; T(2): 0.0; S(4): 0.0; S(7): 0.0; S(9): 0.0; S(10): 0.0; S(13): 0.0; T(14): 0.0; S(16): 0.1; S(18): 99.9	0	1.357e-11
Q12888	ETAVPGPLGIEDISPNLSPDDK	S18(Phospho)	T(2): 0.0; S(14): 0.0; S(18): 100.0	0	1.386e-11
B2RA03	STSFRGGMGSGGLATGIAGGLAGMGGIQNEK	S10(Phospho)	S(1): 0.3; T(2): 5.0; S(3): 5.0; S(10): 89.7; T(15): 0.0	0	1.395e-11
Q09666	LPSGSGAASPTGSAVDIR	S9(Phospho)	S(3): 0.0; S(5): 0.0; S(9): 100.0; T(11): 0.0; S(13): 0.0	0	1.399e-11
H7C446	VGGSDEEASGIPSR	S4(Phospho)	S(4): 100.0; S(9): 0.0; S(13): 0.0	0	1.401e-11
B4DFP1	AIGGIILTASHNPGGPNGDFGIK	S10(Phospho)	T(8): 0.0; S(10): 100.0	0	1.424e-11
G5EA03	MPEANQLHLPNLNSQVDSPSSEKSPVMTPFK	S21(Phospho)	S(14): 0.0; S(18): 0.0; S(20): 0.3; S(21): 99.7; S(24): 0.0; T(28): 0.0	0	1.429e-11
Q6PL18	IESDTEETQDTSVDHNETGNTGESSVEENEK	S3(Phospho)	S(3): 100.0; T(5): 0.0; T(8): 0.0; T(11): 0.0; S(12): 0.0; T(18): 0.0; T(21): 0.0; S(24): 0.0; S(25): 0.0	0	1.441e-11
Q13523	SINEENGEVSEDQSQNK	S10(Phospho)	S(1): 0.0; S(10): 100.0; S(14): 0.0	0	1.462e-11
Q13428	LASTNSSVLGADLPSSMK	S3(Phospho)	S(3): 100.0; T(4): 0.0; S(6): 0.0; S(7): 0.0; S(15): 0.0; S(16): 0.0	0	1.469e-11
Q8NEJ9	LSSEDEEEDEAEDDQSEASGKK	S3(Phospho)	S(2): 0.2; S(3): 99.8; S(16): 0.0; S(19): 0.0	0	1.475e-11
J3KQ45	TESGEETDLISPPQEEVK	S3(Phospho)	T(1): 0.0; S(3): 100.0; T(7): 0.0; S(11): 0.0	0	1.478e-11
P53367	HSLPSGLGLSETQITSHGFDNTK	S5(Phospho)	S(2): 0.0; S(5): 100.0; S(10): 0.0; T(12): 0.0; T(15): 0.0; S(16): 0.0; T(22): 0.0	0	1.511e-11
P07900	EEKESEDKPEIEDVGSDEEEEK	S16(Phospho)	S(5): 0.0; S(16): 100.0	0	1.518e-11
A0A024QZ54	QEEGADASEEDPTPAGEEDVK	S8(Phospho)	S(8): 100.0; T(13): 0.0	0	1.584e-11
A8K103	GMKDDKEEEEDGTGSPQLNNR	S15(Phospho)	T(13): 0.0; S(15): 100.0	0	1.587e-11
B4DS13	SQSSDTEQQSPTSGGGK	S3(Phospho); S4(Phospho)	S(1): 0.2; S(3): 99.8; S(4): 100.0; T(6): 0.0; S(10): 0.0; T(12): 0.0; S(13): 0.0	0	1.595e-11
Q53RS3	LLHEDLDESDDDMDEK	S9(Phospho)	S(9): 100.0	0	1.599e-11
P27824	SDAEEDGGTVSQEEEDR	S11(Phospho)	S(1): 0.0; T(9): 0.0; S(11): 100.0	0	1.647e-11
B2RBJ7	GIGLDESELDSEAELMR	S11(Phospho)	S(7): 0.0; S(11): 100.0	0	1.666e-11
B2RAH5	RSTQGVTLTDLQEAEK	T3(Phospho)	S(2): 0.0; T(3): 100.0; T(7): 0.0; T(9): 0.0	0	1.675e-11
P06748	DELHIVEAEAMNYEGSPIK	S16(Phospho)	Y(13): 0.0; S(16): 100.0	0	1.682e-11
O00178	SAMDSPVPASMFAPEPSSPGAAR	S18(Phospho)	S(1): 0.0; S(5): 0.0; S(10): 0.0; S(17): 50.0; S(18): 50.0	0	1.701e-11
Q68CX0	VLKEPVNLEGDDTSLIHGK	S14(Phospho)	T(13): 0.0; S(14): 100.0	0	1.808e-11
Q16176	SAGAPASVSGQDADGSTSPR	S18(Phospho)	S(1): 0.0; S(7): 0.0; S(9): 0.0; S(16): 0.0; T(17): 3.1; S(18): 96.9	0	1.812e-11
F6T1Q0	EAKPGAAEPEVGVPSSLSPSSPSSSWTETDVEER	S21(Phospho)	S(15): 0.0; S(16): 0.0; S(18): 0.0; S(20): 0.3; S(21): 99.7; S(23): 0.0; S(24): 0.0; S(25): 0.0; T(27): 0.0; T(29): 0.0	0	1.841e-11
Q9BWG6	ISREPEPAAGPQAEESATVSAPAPMSPTR	S26(Phospho)	S(2): 0.0; S(16): 0.0; T(18): 0.0; S(20): 0.0; S(26): 50.0; T(28): 50.0	0	1.846e-11
B7Z7U0	KPPAPPSPVQSQSPSTNWSPAVPVK	S7(Phospho); S13(Phospho)	S(7): 100.0; S(11): 0.0; S(13): 100.0; S(15): 0.0; T(16): 0.0; S(19): 0.0	0	1.857e-11
A0A087WW12	GLSGEEEDDEPDCCNDER	S3(Phospho); C13(Carbamidomethyl); C14(Carbamidomethyl)	S(3): 100.0	0	1.867e-11
A8KAQ5	GGGGGQDNGLEGLGNDSR	S17(Phospho)	S(17): 100.0	0	1.877e-11
B4DP61	GTGQSDDSDIWDDTALIK	S5(Phospho); S8(Phospho)	T(2): 0.0; S(5): 100.0; S(8): 100.0; T(14): 0.0	0	1.884e-11
O43719	VFDDESDEKEDEEYADEKGLEAADK	S6(Phospho)	S(6): 100.0; Y(14): 0.0	0	1.893e-11
Q9UNX4	IKGSSPGIQDTLEAEDGAFETDEAPEDR	S5(Phospho)	S(4): 5.4; S(5): 94.6; T(11): 0.0; T(21): 0.0	0	1.897e-11
O75643	EEASDDDMEGDEAVVR	S4(Phospho)	S(4): 100.0	0	1.904e-11
Q14134	SKSGSEEVLCDSCIGNK	S3(Phospho); C10(Carbamidomethyl); C13(Carbamidomethyl)	S(1): 0.0; S(3): 100.0; S(5): 0.0; S(12): 0.0	0	1.917e-11
Q5T092	VDPSLMEDSDDGPSLPTK	S9(Phospho)	S(4): 0.0; S(9): 100.0; S(14): 0.0; T(17): 0.0	0	1.941e-11
H0Y579	QEKPAEKPAETPVATSPTATDSTSGDSSR	S16(Phospho)	T(11): 0.0; T(15): 0.0; S(16): 100.0; T(18): 0.0; T(20): 0.0; S(22): 0.0; T(23): 0.0; S(24): 0.0; S(27): 0.0; S(28): 0.0	0	1.989e-11
Q53H80	HLETSFQQTDPCCTSDAQPHAFLLSGPASPGTSSAASSPLKK	C12(Carbamidomethyl); C13(Carbamidomethyl); S29(Phospho)	T(4): 0.0; S(5): 0.0; T(9): 0.0; T(14): 0.0; S(15): 0.0; S(25): 0.0; S(29): 99.2; T(32): 0.8; S(33): 0.0; S(34): 0.0; S(37): 0.0; S(38): 0.0	0	2.032e-11
A0A075B784	HSCSPMGDGDPEAMEESPR	C3(Carbamidomethyl); S17(Phospho)	S(2): 0.0; S(4): 0.0; S(17): 100.0	0	2.063e-11
P31943	HTGPNSPDTANDGFVR	S6(Phospho)	T(2): 0.0; S(6): 99.9; T(9): 0.1	0	2.093e-11
Q6NYC1	TCSMVGNGDTTSQDDCVSK	C2(Carbamidomethyl); S3(Phospho); C16(Carbamidomethyl)	T(1): 0.0; S(3): 100.0; T(10): 0.0; T(11): 0.0; S(12): 0.0; S(18): 0.0	0	2.105e-11
Q32MZ4	ALDSNSLENDDLSAPGR	S4(Phospho)	S(4): 100.0; S(6): 0.0; S(13): 0.0	0	2.123e-11
Q9H6L6	GLLAQGLRPESPPPAGPLLNGAPAGESPQPK	S11(Phospho); S27(Phospho)	S(11): 100.0; S(27): 100.0	0	2.126e-11
B7Z7U0	KETESEAEDNLDDLEK	S5(Phospho)	T(3): 0.0; S(5): 100.0	0	2.136e-11
B4DGB0	EELEQQTDGDCEEDEEEENDGETPK	T7(Phospho); C11(Carbamidomethyl)	T(7): 100.0; T(23): 0.0	0	2.142e-11
A0A024RBC7	IEDSEPHIPLIDDTDAEDDAPTKR	S4(Phospho)	S(4): 100.0; T(14): 0.0; T(22): 0.0	0	2.161e-11
Q3B7X0	KLEFSSSPDSLSTINDWDDMDDFDTSETSK	S7(Phospho)	S(5): 33.3; S(6): 33.3; S(7): 33.3; S(10): 0.0; S(12): 0.0; T(13): 0.0; T(25): 0.0; S(26): 0.0; T(28): 0.0; S(29): 0.0	0	2.169e-11
Q9NSK0	AASLNYLNQPSAAPLQVSR	S3(Phospho)	S(3): 100.0; Y(6): 0.0; S(11): 0.0; S(18): 0.0	0	2.196e-11
H3BQC4	SPKPAAPAAPPFSSSSGVLGTGLCELDR	S1(Phospho); C24(Carbamidomethyl)	S(1): 100.0; S(13): 0.0; S(14): 0.0; S(15): 0.0; S(16): 0.0; T(21): 0.0	0	2.321e-11
Q53GG0	KISENSYSLDDLEIGPGQLSSSTFDSEK	S3(Phospho)	S(3): 99.5; S(6): 0.3; Y(7): 0.3; S(8): 0.0; S(20): 0.0; S(21): 0.0; S(22): 0.0; T(23): 0.0; S(26): 0.0	0	2.339e-11
Q59H83	GYSESVGAAPNASDGLAHSGK	S5(Phospho)	Y(2): 0.1; S(3): 49.9; S(5): 49.9; S(13): 0.0; S(19): 0.0	0	2.358e-11
Q9UIG0	LAEDEGDSEPEAVGQSR	S8(Phospho)	S(8): 100.0; S(16): 0.0	0	2.358e-11
Q12888	MVIQGPSSPQGEAMVTDVLEDQKEGR	S7(Phospho)	S(7): 50.0; S(8): 50.0; T(16): 0.0	0	2.358e-11
B4DZ28	LLEDSEESSEETVSR	S5(Phospho)	S(5): 100.0; S(8): 0.0; S(9): 0.0; T(12): 0.0; S(14): 0.0	0	2.359e-11
J3KNG9	ALTQPSPVSTPSSVQFFLQEDDSADR	S6(Phospho)	T(3): 0.0; S(6): 99.7; S(9): 0.0; T(10): 0.2; S(12): 0.0; S(13): 0.0; S(23): 0.0	0	2.388e-11
B7Z2K7	KAYSFCGTVEYMAPEVVNR	S4(Phospho); C6(Carbamidomethyl)	Y(3): 0.1; S(4): 99.9; T(8): 0.0; Y(11): 0.0	0	2.389e-11
B4DQZ7	ELLVPQHTVQLVGGLSPLSSPSDTK	S16(Phospho); S20(Phospho)	T(8): 0.0; S(16): 100.0; S(19): 0.3; S(20): 94.8; S(22): 4.9; T(24): 0.0	0	2.398e-11
O75128	WATDQEDCSDQDLAGTPDLGPQKSPLWEK	C8(Carbamidomethyl); S24(Phospho)	T(3): 0.0; S(9): 0.0; T(16): 0.0; S(24): 100.0	0	2.404e-11
F2Z2T1	KTSDANETEDHLESLICK	S3(Phospho); C17(Carbamidomethyl)	T(2): 3.3; S(3): 96.7; T(8): 0.0; S(14): 0.0	0	2.492e-11
Q9H4L5	LHSSNPNLSTLDFGEEK	S4(Phospho)	S(3): 0.0; S(4): 100.0; S(9): 0.0; T(10): 0.0	0	2.551e-11
J3KPH4	LPPPFPGLEPESEGAAGGSEPEAGDSDTEGEDIFTGAAVVSK	S19(Phospho); T28(Phospho)	S(12): 0.0; S(19): 100.0; S(26): 11.7; T(28): 88.3; T(35): 0.0; S(41): 0.0	0	2.583e-11
Q5JTV8	RGLRDSHSSEEDEASSQTDLSQTISK	S6(Phospho); S8(Phospho); S9(Phospho)	S(6): 100.0; S(8): 100.0; S(9): 100.0; S(15): 0.0; S(16): 0.0; T(18): 0.0; S(21): 0.0; T(23): 0.0; S(25): 0.0	0	2.586e-11
Q86TC9	TPVDESDDEIQHDEIPTGK	S6(Phospho)	T(1): 0.0; S(6): 100.0; T(17): 0.0	0	2.586e-11
E7EWD6	KSSLTQEEAPVSWEK	S3(Phospho)	S(2): 0.0; S(3): 100.0; T(5): 0.0; S(12): 0.0	0	2.597e-11
Q8N8S7	QNSQLPAQVQNGPSQEELEIQR	S3(Phospho)	S(3): 100.0; S(14): 0.0	0	2.655e-11
K0J5S8	NVMSAFGLTDDQVSGPPSAPAEDR	S18(Phospho)	S(4): 0.0; T(9): 0.0; S(14): 0.0; S(18): 100.0	0	2.695e-11
B4DE42	NQKPSQVNGAPGSPTEPAGQK	S13(Phospho)	S(5): 0.0; S(13): 100.0; T(15): 0.0	0	2.701e-11
S4R3H4	HSTPHAAFQPNSQIGEEMSQNSFIK	S19(Phospho)	S(2): 0.0; T(3): 0.0; S(12): 0.0; S(19): 100.0; S(22): 0.0	0	2.719e-11
Q6R327	HNSESESVPSSMFILEDDR	S3(Phospho)	S(3): 100.0; S(5): 0.0; S(7): 0.0; S(10): 0.0; S(11): 0.0	0	2.755e-11
I3L436	GVHIHQAGGSPPASSTSSSSLTNDVAK	S10(Phospho)	S(10): 100.0; S(14): 0.0; S(15): 0.0; T(16): 0.0; S(17): 0.0; S(18): 0.0; S(19): 0.0; S(20): 0.0; T(22): 0.0	0	2.775e-11
Q86VM9	GPTSSPCEEEGDEGEEDR	S5(Phospho); C7(Carbamidomethyl)	T(3): 0.0; S(4): 0.1; S(5): 99.9	0	2.794e-11
Q8TDD1	LGPGRPLPTFPTSECTSDVEPDTR	C15(Carbamidomethyl); S17(Phospho)	T(9): 0.0; T(12): 0.0; S(13): 0.0; T(16): 0.1; S(17): 99.9; T(23): 0.0	0	2.844e-11
B7Z341	THSTSSSLGSGESPFSR	S3(Phospho)	T(1): 0.0; S(3): 100.0; T(4): 0.0; S(5): 0.0; S(6): 0.0; S(7): 0.0; S(10): 0.0; S(13): 0.0; S(16): 0.0	0	2.882e-11
A8K1J3	AVEYLLTGIPGSPEPEHGSVQESQVSEQPATEAGENPLEFLR	S12(Phospho)	Y(4): 0.0; T(7): 9.6; S(12): 0.2; S(19): 0.2; S(23): 80.4; S(26): 9.6; T(31): 0.0	0	2.902e-11
A0A024R9Y2	QLSTSSDSPAPASSSSQVTASTSQQPVR	S3(Phospho)	S(3): 93.9; T(4): 5.8; S(5): 0.4; S(6): 0.0; S(8): 0.0; S(13): 0.0; S(14): 0.0; S(15): 0.0; S(16): 0.0; T(19): 0.0; S(21): 0.0; T(22): 0.0; S(23): 0.0	0	2.972e-11
Q9Y4H2	SPGEYINIDFGEPGAR	S1(Phospho)	S(1): 100.0; Y(5): 0.0	0	2.979e-11
O94874	KDDDSDDESQSSHTGK	S5(Phospho)	S(5): 100.0; S(9): 0.0; S(11): 0.0; S(12): 0.0; T(14): 0.0	0	3.007e-11
Q14684	VGDGDLSAEEIPENEVSLR	S7(Phospho)	S(7): 100.0; S(17): 0.0	0	3.035e-11
A0A024R3E4	AHSSPASLQLGAVSPGTLTPTGVVSGPAATPTAQHLR	S4(Phospho)	S(3): 48.4; S(4): 48.4; S(7): 3.3; S(14): 0.0; T(17): 0.0; T(19): 0.0; T(21): 0.0; S(25): 0.0; T(30): 0.0; T(32): 0.0	0	3.148e-11
Q8NCF5	TEFLDLDNSPLSPPSPR	S15(Phospho)	T(1): 0.0; S(9): 0.0; S(12): 0.0; S(15): 100.0	0	3.166e-11
H7BZ52	QSAGPNSPTGGGGGGGSGGTR	S7(Phospho)	S(2): 0.0; S(7): 100.0; T(9): 0.0; S(17): 0.0; T(20): 0.0	0	3.195e-11
Q7Z497	WDETPASQMGGSTPVLTPGK	T13(Phospho)	T(4): 0.0; S(7): 0.0; S(12): 4.0; T(13): 96.0; T(17): 0.0	0	3.206e-11
Q6UUV7	LFSLSNPSLSTTNLSGPSR	S5(Phospho)	S(3): 0.0; S(5): 100.0; S(8): 0.0; S(10): 0.0; T(11): 0.0; T(12): 0.0; S(15): 0.0; S(18): 0.0	0	3.232e-11
Q9NZ63	RGDSESEEDEQDSEEVR	S4(Phospho); S6(Phospho)	S(4): 100.0; S(6): 100.0; S(13): 0.0	0	3.246e-11
Q71UH4	KASGSENEGDYNPGR	S3(Phospho)	S(3): 100.0; S(5): 0.0; Y(11): 0.0	0	3.302e-11
Q8IWZ3	GGGAGGNSDSDNLDSTDCNSESSSGGK	S8(Phospho); C18(Carbamidomethyl)	S(8): 95.6; S(10): 4.4; S(15): 0.0; T(16): 0.0; S(20): 0.0; S(22): 0.0; S(23): 0.0; S(24): 0.0	0	3.31e-11
H0YLG5	SQSLPNSLDYTQTSDPGR	S3(Phospho)	S(1): 0.0; S(3): 100.0; S(7): 0.0; Y(10): 0.0; T(11): 0.0; T(13): 0.0; S(14): 0.0	0	3.319e-11
Q13442	SLDSDESEDEEDDYQQKR	S7(Phospho)	S(1): 0.0; S(4): 0.0; S(7): 100.0; Y(14): 0.0	0	3.365e-11
Q12873	KNDMDEPPPLDYGSGEDDGKSDK	S14(Phospho)	Y(12): 0.0; S(14): 100.0; S(21): 0.0	0	3.379e-11
Q08211	SEEVPAFGVASPPPLTDTPDTTANAEGDLPTTMGGPLPPHLALK	S11(Phospho)	S(1): 0.1; S(11): 99.9; T(16): 0.0; T(18): 0.0; T(21): 0.0; T(22): 0.0; T(31): 0.0; T(32): 0.0	0	3.39e-11
A0A087WZZ5	QEEMNSQQEEEEMETDAR	S6(Phospho)	S(6): 100.0; T(15): 0.0	0	3.416e-11
G5EA03	SHSTEPNLSSFLNDPNPMK	S3(Phospho)	S(1): 0.0; S(3): 100.0; T(4): 0.0; S(9): 0.0; S(10): 0.0	0	3.467e-11
Q12948	GSPQSAAAELSSGLLASAAASSR	S2(Phospho)	S(2): 100.0; S(5): 0.0; S(11): 0.0; S(12): 0.0; S(17): 0.0; S(21): 0.0; S(22): 0.0	0	3.501e-11
Q9UQ35	HGGSPQPLATTPLSQEPVNPPSEASPTR	S25(Phospho)	S(4): 0.0; T(10): 0.0; T(11): 0.0; S(14): 0.0; S(22): 95.2; S(25): 4.6; T(27): 0.2	0	3.515e-11
A8K6X9	KGGEFDEFVNDDTDDDLPISKK	T13(Phospho)	T(13): 100.0; S(20): 0.0	0	3.6e-11
Q5VU10	KPRPSEGDEDCLPASK	S5(Phospho); C11(Carbamidomethyl)	S(5): 100.0; S(15): 0.0	0	3.673e-11
Q9UPT8	AAKPGPAEAPSPTASPSGDASPPATAPYDPR	S21(Phospho)	S(11): 0.0; T(13): 0.0; S(15): 0.0; S(17): 0.0; S(21): 100.0; T(25): 0.0; Y(28): 0.0	0	3.684e-11
B3KSZ4	VSSPLPSPSAMTDAANSQAAAK	S3(Phospho)	S(2): 4.7; S(3): 95.3; S(7): 0.0; S(9): 0.0; T(12): 0.0; S(17): 0.0	0	3.709e-11
Q7Z2K8	HRSPSGAGEGASCSDGPR	S3(Phospho); C13(Carbamidomethyl)	S(3): 100.0; S(5): 0.0; S(12): 0.0; S(14): 0.0	0	3.825e-11
E9PK01	KPATPAEDDEDDDIDLFGSDNEEEDKEAAQLR	S19(Phospho)	T(4): 0.0; S(19): 100.0	0	3.832e-11
Q68CZ2	KLSLGQYDNDAGGQLPFSK	S3(Phospho)	S(3): 100.0; Y(7): 0.0; S(18): 0.0	0	3.863e-11
Q8NEJ9	LSSEDEEEDEAEDDQSEASGKK	S2(Phospho); S3(Phospho)	S(2): 100.0; S(3): 100.0; S(16): 0.0; S(19): 0.0	0	3.892e-11
Q5H924	REESPMDVDQPSPSAQDTQSIASDGTPQGEK	S12(Phospho)	S(4): 0.0; S(12): 100.0; S(14): 0.0; T(18): 0.0; S(20): 0.0; S(23): 0.0; T(26): 0.0	0	3.898e-11
B7ZLW1	TQSGSSLSLASAATTEPESVHSGGTPSQR	S3(Phospho)	T(1): 50.0; S(3): 50.0; S(5): 0.0; S(6): 0.0; S(8): 0.0; S(11): 0.0; T(14): 0.0; T(15): 0.0; S(19): 0.0; S(22): 0.0; T(25): 0.0; S(27): 0.0	0	3.92e-11
E9PL60	TSGGDHAPDSPSGENSPAPQGR	S10(Phospho)	T(1): 0.0; S(2): 0.0; S(10): 100.0; S(12): 0.0; S(16): 0.0	0	3.998e-11
B7Z8Y3	TAESQTPTPSATSFFSGK	T6(Phospho)	T(1): 0.0; S(4): 0.0; T(6): 100.0; T(8): 0.0; S(10): 0.0; T(12): 0.0; S(13): 0.0; S(16): 0.0	0	4.023e-11
H0YHT2	KLSSSDAPAQDTGSSAAAVETDASR	S3(Phospho)	S(3): 95.7; S(4): 4.2; S(5): 0.2; T(12): 0.0; S(14): 0.0; S(15): 0.0; T(21): 0.0; S(24): 0.0	0	4.03e-11
Q86WR7	AQVLATIHGHAGAFPAAGDAGEGAPGGGSSPER	S30(Phospho)	T(6): 0.0; S(29): 50.0; S(30): 50.0	0	4.042e-11
Q6UN15	ITAEDCTMEVTPGAEIQDGR	C6(Carbamidomethyl); T11(Phospho)	T(2): 0.0; T(7): 0.0; T(11): 100.0	0	4.073e-11
B2RBJ7	DSGNNSGDQATEEEEGGYSCGTAESHDSK	S6(Phospho); C20(Carbamidomethyl)	S(2): 0.0; S(6): 100.0; T(11): 0.0; Y(18): 0.0; S(19): 0.0; T(22): 0.0; S(25): 0.0; S(28): 0.0	0	4.123e-11
A0A087X0M4	NWEDEDFYDSDDDTFLDR	S10(Phospho)	Y(8): 0.0; S(10): 99.9; T(14): 0.1	0	4.131e-11
D3DVC4	DGESDGFADEEESGEEGEEDQEEGREPGAGR	S4(Phospho); S13(Phospho)	S(4): 100.0; S(13): 100.0	0	4.149e-11
Q9H0B6	DMAGGAGPRSESDLEDVGPTAEWNGDGSGSLR	S12(Phospho)	S(10): 50.0; S(12): 50.0; T(20): 0.0; S(28): 0.0; S(30): 0.0	0	4.185e-11
B4DY23	RKPEDVLDDDDAGSAPLK	S14(Phospho)	S(14): 100.0	0	4.255e-11
B7Z7U0	KPPAPPSPVQSQSPSTNWSPAVPVKK	S7(Phospho)	S(7): 100.0; S(11): 0.0; S(13): 0.0; S(15): 0.0; T(16): 0.0; S(19): 0.0	0	4.322e-11
O43399	GLLSDSMTDVPVDTGVAAR	S6(Phospho)	S(4): 0.0; S(6): 100.0; T(8): 0.0; T(14): 0.0	0	4.37e-11
A0A087X1H5	KSSPSTGSLDSGNESK	S3(Phospho)	S(2): 0.0; S(3): 100.0; S(5): 0.0; T(6): 0.0; S(8): 0.0; S(11): 0.0; S(15): 0.0	0	4.38e-11
K7ENK9	DQKLSELDDRADALQAGASQFETSAAK	S5(Phospho)	S(5): 100.0; S(19): 0.0; T(23): 0.0; S(24): 0.0	0	4.4e-11
D6W5C0	AQTLPTSVVTITSESSPGKR	S16(Phospho)	T(3): 0.0; T(6): 0.0; S(7): 0.0; T(10): 0.0; T(12): 0.0; S(13): 0.0; S(15): 3.6; S(16): 96.4	0	4.43e-11
P42858	SGSIVELIAGGGSSCSPVLSR	C15(Carbamidomethyl); S16(Phospho)	S(1): 0.0; S(3): 0.0; S(13): 0.0; S(14): 0.1; S(16): 99.9; S(20): 0.0	0	4.469e-11
Q6ZV73	SLDEADSENKEEVSPLGSK	S1(Phospho)	S(1): 100.0; S(7): 0.0; S(14): 0.0; S(18): 0.0	0	4.486e-11
B4DDR0	IKEEPVSEEGEEDEEQEAEEEPMDTSPSGLHSK	S7(Phospho)	S(7): 100.0; T(25): 0.0; S(26): 0.0; S(28): 0.0; S(32): 0.0	0	4.508e-11
C9J4C4	AHSPAEGASVESSSPGPK	S3(Phospho)	S(3): 100.0; S(9): 0.0; S(12): 0.0; S(13): 0.0; S(14): 0.0	0	4.542e-11
B4DYJ1	VSGSPEQAVEENLSSYSLDR	S2(Phospho)	S(2): 50.0; S(4): 50.0; S(14): 0.0; S(15): 0.0; Y(16): 0.0; S(17): 0.0	0	4.616e-11
C9JWF0	TESPATAAETASEELDNR	S3(Phospho)	T(1): 0.1; S(3): 99.9; T(6): 0.0; T(10): 0.0; S(12): 0.0	0	4.637e-11
H7C152	RESDESGESAPDEGGEGAR	S3(Phospho)	S(3): 100.0; S(6): 0.0; S(9): 0.0	0	4.647e-11
B4DZX7	KVEEEQEADEEDVSEEEAESK	S14(Phospho)	S(14): 100.0; S(20): 0.0	0	4.652e-11
J3KP58	QLSSSSGNTDTQADEDER	S3(Phospho)	S(3): 100.0; S(4): 0.0; S(5): 0.0; S(6): 0.0; T(9): 0.0; T(11): 0.0	0	4.677e-11
O00264	GDQPAASGDSDDDEPPPLPR	S10(Phospho)	S(7): 0.0; S(10): 100.0	0	4.678e-11
P35579	KGAGDGSDEEVDGK	S7(Phospho)	S(7): 100.0	0	4.709e-11
H0YMH7	KYSEVDDSLPSGGEKPSK	S3(Phospho)	Y(2): 0.0; S(3): 100.0; S(8): 0.0; S(11): 0.0; S(17): 0.0	0	4.763e-11
Q9H4G0	APESDTGDEDQDQER	S4(Phospho)	S(4): 100.0; T(6): 0.0	0	4.798e-11
O00505	NVPQEESLEDSDVDADFK	S11(Phospho)	S(7): 0.0; S(11): 100.0	0	4.812e-11
Q9BU64	KQSEELQSVQAQEGALGTK	S3(Phospho)	S(3): 100.0; S(8): 0.0; T(18): 0.0	0	4.858e-11
F8W9S7	EVSSRPSTPGLSVVSGISATSEDIPNKIEDLR	S4(Phospho); S7(Phospho)	S(3): 52.0; S(4): 52.0; S(7): 86.4; T(8): 9.5; S(12): 0.0; S(15): 0.0; S(18): 0.0; T(20): 0.0; S(21): 0.0	0	4.87e-11
Q9NXG2	FTDKDQQPSGSEGEDDDAEAALK	S9(Phospho); S11(Phospho)	T(2): 0.0; S(9): 100.0; S(11): 100.0	0	4.958e-11
Q9NY27	NHSDSSTSESEVSSVSPLK	S16(Phospho)	S(3): 0.0; S(5): 0.0; S(6): 0.0; T(7): 0.0; S(8): 0.0; S(10): 0.0; S(13): 0.0; S(14): 0.0; S(16): 100.0	0	5.057e-11
Q6IEH8	NNTAAETEDDESDGEDR	S12(Phospho)	T(3): 0.0; T(7): 0.0; S(12): 100.0	0	5.092e-11
A0A024R8K8	RISSSSVQPCSEEVSTPQDSLAQCK	S3(Phospho); C10(Carbamidomethyl); C24(Carbamidomethyl)	S(3): 99.6; S(4): 0.4; S(5): 0.0; S(6): 0.0; S(11): 0.0; S(15): 0.0; T(16): 0.0; S(20): 0.0	0	5.144e-11
O75179	ATVPVAAATAAEGEGSPPAVAAVAGPPAAAEVGGGVGGSSR	T2(Phospho)	T(2): 99.9; T(9): 0.1; S(16): 0.0; S(39): 0.0; S(40): 0.0	0	5.183e-11
P57060	DTSSSPTTGSTVQSVDLIFTR	S5(Phospho)	T(2): 0.0; S(3): 0.0; S(4): 0.0; S(5): 48.7; T(7): 48.7; T(8): 2.6; S(10): 0.0; T(11): 0.0; S(14): 0.0; T(20): 0.0	0	5.206e-11
O75475	TGVTSTSDSEEEGDDQEGEK	S7(Phospho); S9(Phospho)	T(1): 0.0; T(4): 0.0; S(5): 0.0; T(6): 0.0; S(7): 100.0; S(9): 100.0	0	5.318e-11
Q9UPN7	VSGEEELHTGPPAPQGPLSVPQGLPTQSLASPPAR	S31(Phospho)	S(2): 0.0; T(9): 0.0; S(19): 0.0; T(26): 0.0; S(28): 0.0; S(31): 100.0	0	5.414e-11
Q9H6L6	GLLAQGLRPESPPPAGPLLNGAPAGESPQPK	S11(Phospho)	S(11): 100.0; S(27): 0.0	0	5.603e-11
Q9HCD6	DCSYGAVTSPTSTLESR	C2(Carbamidomethyl); S9(Phospho)	S(3): 0.0; Y(4): 0.0; T(8): 0.1; S(9): 99.9; T(11): 0.0; S(12): 0.0; T(13): 0.0; S(16): 0.0	0	5.619e-11
G8JLD3	TNSTGGSSGSSVGGGSGK	S3(Phospho)	T(1): 0.0; S(3): 100.0; T(4): 0.0; S(7): 0.0; S(8): 0.0; S(10): 0.0; S(11): 0.0; S(16): 0.0	0	5.623e-11
A0A024QZ54	QEEGADASEEDPTPAGEEDVKDAR	S8(Phospho)	S(8): 100.0; T(13): 0.0	0	5.659e-11
A0A024R3M0	GTGSGGQLQDLDCSSSDDEGAAQNSTKPSATK	C13(Carbamidomethyl); S14(Phospho); S15(Phospho); S16(Phospho)	T(2): 98.5; S(4): 1.5; S(14): 0.1; S(15): 100.0; S(16): 100.0; S(25): 0.0; T(26): 0.0; S(29): 0.0; T(31): 0.0	0	5.69e-11
B3KW08	HSVTAATPPPSPTSGESGDLLSNLLQSPSSAK	S14(Phospho)	S(2): 0.0; T(4): 0.0; T(7): 0.0; S(11): 93.2; T(13): 0.4; S(14): 6.3; S(17): 0.0; S(22): 0.0; S(27): 0.0; S(29): 0.0; S(30): 0.0	0	5.724e-11
M0R3F1	RGRSPQPPAEEDEDDFDDTLVAIDTYNCDLHFK	S4(Phospho); C28(Carbamidomethyl)	S(4): 100.0; T(19): 0.0; T(25): 0.0; Y(26): 0.0	0	5.79e-11
P02545	SVGGSGGGSFGDNLVTR	S9(Phospho)	S(1): 0.0; S(5): 0.0; S(9): 100.0; T(16): 0.0	0	5.796e-11
E7EMW7	HGSSRSVVDMDLDDTDDGDDNAPLFYQPGK	S3(Phospho); S6(Phospho)	S(3): 99.4; S(4): 1.2; S(6): 99.4; T(15): 0.0; Y(26): 0.0	0	5.901e-11
A0A024RAC0	EKPDSDDDLDIASLVTAK	S5(Phospho)	S(5): 100.0; S(13): 0.0; T(16): 0.0	0	6.04e-11
Q9BUT9	APSTSPSFEGTQETYTVAHEENVR	S7(Phospho)	S(3): 0.0; T(4): 0.0; S(5): 0.0; S(7): 99.7; T(11): 0.3; T(14): 0.0; Y(15): 0.0; T(16): 0.0	0	6.046e-11
F1T0I1	QIDSSPVGGETDETTVSQNYR	S5(Phospho)	S(4): 0.2; S(5): 99.8; T(11): 0.0; T(14): 0.0; T(15): 0.0; S(17): 0.0; Y(20): 0.0	0	6.091e-11
Q6P6C2	SYESSEDCSEAAGSPAR	C8(Carbamidomethyl); S14(Phospho)	S(1): 0.0; Y(2): 0.0; S(4): 0.0; S(5): 0.0; S(9): 0.0; S(14): 100.0	0	6.157e-11
P08238	IEDVGSDEEDDSGKDK	S6(Phospho)	S(6): 100.0; S(12): 0.0	0	6.201e-11
E9PF63	SQLQALHIGLDSSSIGSGPGDAEADDGFPESR	S14(Phospho)	S(1): 0.0; S(12): 0.5; S(13): 0.5; S(14): 98.9; S(17): 0.0; S(31): 0.0	0	6.228e-11
Q14676	LLLAEDSEEEVDFLSER	S7(Phospho)	S(7): 100.0; S(15): 0.0	0	6.23e-11
O94906	LSQVSDSVSGQTVVDPK	T12(Phospho)	S(2): 0.0; S(5): 0.0; S(7): 0.0; S(9): 0.0; T(12): 100.0	0	6.268e-11
O60293	EEGELEDGEISDDDNNSQIR	S11(Phospho)	S(11): 100.0; S(17): 0.0	0	6.287e-11
A0A024R0X0	QLSLEGSGLGVEDLKDNTPSGK	S3(Phospho)	S(3): 100.0; S(7): 0.0; T(18): 0.0; S(20): 0.0	0	6.289e-11
Q9NZ63	RGDSESEEDEQDSEEVR	S4(Phospho)	S(4): 100.0; S(6): 0.0; S(13): 0.0	0	6.382e-11
V9HWK1	KQSLGELIGTLNAAK	S3(Phospho)	S(3): 100.0; T(10): 0.0	0	6.388e-11
B2RAX6	VQEHEDSGDSEVENEAK	S7(Phospho)	S(7): 100.0; S(10): 0.0	0	6.476e-11
H7C3D5	QALDSEEEEEDVAAK	S5(Phospho)	S(5): 100.0	0	6.478e-11
E9PFQ4	KDSLPDADLASCGSLSQSSASFFTPR	S3(Phospho); C12(Carbamidomethyl)	S(3): 100.0; S(11): 0.0; S(14): 0.0; S(16): 0.0; S(18): 0.0; S(19): 0.0; S(21): 0.0; T(24): 0.0	0	6.498e-11
P18858	VLGSEGEEEDEALSPAK	S4(Phospho)	S(4): 100.0; S(14): 0.0	0	6.538e-11
Q04656	SPSYTNDSTATFIIDGMHCK	S1(Phospho); C19(Carbamidomethyl)	S(1): 100.0; S(3): 0.0; Y(4): 0.0; T(5): 0.0; S(8): 0.0; T(9): 0.0; T(11): 0.0	0	6.545e-11
Q149P0	ADAPDAGAQSDSELPSYHQNDVSLDR	S10(Phospho)	S(10): 100.0; S(12): 0.0; S(16): 0.0; Y(17): 0.0; S(23): 0.0	0	6.782e-11
B7Z255	NSVDTATSSSLSTPSEPLSPTSSLGEERN	S19(Phospho)	S(2): 0.0; T(5): 0.0; T(7): 0.0; S(8): 0.0; S(9): 0.0; S(10): 0.0; S(12): 0.0; T(13): 0.0; S(15): 0.0; S(19): 95.2; T(21): 4.5; S(22): 0.2; S(23): 0.0	0	6.853e-11
A0A024R7G6	LDPFESSDPFSSSSVSSK	S7(Phospho)	S(6): 96.6; S(7): 3.4; S(11): 0.0; S(12): 0.0; S(13): 0.0; S(14): 0.0; S(16): 0.0; S(17): 0.0	0	6.885e-11
Q7Z461	KLTVDTPGAPETLAPVAAPEEDKDSEAEVEVESR	T3(Phospho); S25(Phospho)	T(3): 98.9; T(6): 1.1; T(12): 0.0; S(25): 100.0; S(33): 0.0	0	6.995e-11
P78527	LTPLPEDNSMNVDQDGDPSDR	S9(Phospho)	T(2): 0.0; S(9): 100.0; S(19): 0.0	0	7.041e-11
O15061	QRSPAPGSPDEEGGAEAPAAGIR	S3(Phospho)	S(3): 100.0; S(8): 0.0	0	7.1e-11
P05387	YVASYLLAALGGNSSPSAK	S15(Phospho)	Y(1): 0.0; S(4): 0.0; Y(5): 0.0; S(14): 3.1; S(15): 93.8; S(17): 3.1	0	7.158e-11
Q7Z3D7	HDYDDSSEEQSAEDSYEASPGSETQR	S6(Phospho)	Y(3): 0.0; S(6): 95.2; S(7): 4.8; S(11): 0.0; S(15): 0.0; Y(16): 0.0; S(19): 0.0; S(22): 0.0; T(24): 0.0	0	7.29e-11
C9JWF0	REEGPPPPSPDGASSDAEPEPPSGR	S15(Phospho)	S(9): 0.0; S(14): 0.3; S(15): 99.7; S(23): 0.0	0	7.307e-11
Q05209	DVDVSEDSPPPLPER	S8(Phospho)	S(5): 0.0; S(8): 100.0	0	7.335e-11
B0QY68	LTRYSQGDDDGSSSSGGSSVAGSQSTLFK	T2(Phospho)	T(2): 93.8; Y(4): 5.8; S(5): 0.4; S(12): 0.0; S(13): 0.0; S(14): 0.0; S(15): 0.0; S(18): 0.0; S(19): 0.0; S(23): 0.0; S(25): 0.0; T(26): 0.0	0	7.384e-11
B2RWP4	TPSSPSKSPASFEIPASAMEANGVDGDGLNKPAK	T1(Phospho)	T(1): 86.3; S(3): 6.2; S(4): 6.2; S(6): 0.5; S(8): 0.5; S(11): 0.5; S(17): 0.0	0	7.447e-11
B4DQX8	VNQSALEAVTPSPSFQQR	S12(Phospho)	S(4): 0.0; T(10): 0.0; S(12): 97.4; S(14): 2.6	0	7.534e-11
A4LAA3	QSETVDQNSDSDEMLAILK	S9(Phospho); S11(Phospho)	S(2): 0.0; T(4): 0.0; S(9): 100.0; S(11): 100.0	0	7.585e-11
Q86U86	RLSNLPTVDPIAVCHELYNTIR	S3(Phospho); C14(Carbamidomethyl)	S(3): 100.0; T(7): 0.0; Y(18): 0.0; T(20): 0.0	0	7.685e-11
B7Z7U0	KETESEAEDNLDDLEK	T3(Phospho); S5(Phospho)	T(3): 100.0; S(5): 100.0	0	7.726e-11
B7Z8T5	AAVQELSSSILAGEDPEER	S9(Phospho)	S(7): 0.0; S(8): 0.0; S(9): 100.0	0	7.729e-11
Q6FI30	SGSMEEDVDTSPGGDYYTSPSSPTSSSR	S22(Phospho)	S(1): 0.0; S(3): 0.0; T(10): 0.0; S(11): 0.0; Y(16): 0.0; Y(17): 0.0; T(18): 0.0; S(19): 0.0; S(21): 0.0; S(22): 93.8; T(24): 5.8; S(25): 0.4; S(26): 0.0; S(27): 0.0	0	7.821e-11
B2RAH5	KTGSYGALAEITASK	S4(Phospho)	T(2): 0.0; S(4): 99.9; Y(5): 0.1; T(12): 0.0; S(14): 0.0	0	7.882e-11
Q9Y266	NGSLDSPGKQDTEEDEEEDEKDK	S6(Phospho)	S(3): 0.0; S(6): 100.0; T(12): 0.0	0	7.94e-11
D6RC77	STIGVMVTASHNPEEDNGVK	S10(Phospho)	S(1): 0.0; T(2): 0.0; T(8): 0.0; S(10): 100.0	0	8.12e-11
U3KQ48	KDDNDEEEEDIDFFEDIDSDEDEGGLFGSK	S19(Phospho)	S(19): 100.0; S(29): 0.0	0	8.141e-11
Q5T4S7	SNTPMGDKDDDDDDDADEK	T3(Phospho)	S(1): 0.0; T(3): 100.0	0	8.153e-11
F1T0I1	LLPSAPQTLPDGPLASPAR	S16(Phospho)	S(4): 0.0; T(8): 0.0; S(16): 100.0	0	8.307e-11
P35658	HGAPSPSHPISAPQAAAAAALR	S5(Phospho)	S(5): 100.0; S(7): 0.0; S(11): 0.0	0	8.418e-11
A0A024RDF4	IDASKNEEDEGHSNSSPR	S15(Phospho)	S(4): 0.0; S(13): 0.0; S(15): 0.1; S(16): 99.9	0	8.424e-11
Q13595	AHTPTPGIYMGRPTHSGGGGGGGGGGGGGGGGR	T3(Phospho)	T(3): 99.9; T(5): 0.1; Y(9): 0.0; T(14): 0.0; S(16): 0.0	0	8.46e-11
P36507	RKPVLPALTINPTIAEGPSPTSEGASEANLVDLQK	S19(Phospho)	T(9): 0.0; T(13): 0.0; S(19): 100.0; T(21): 0.0; S(22): 0.0; S(26): 0.0	0	8.554e-11
E9PMS6	TPNNVVSTPAPSPDASQLASSLSSQK	S12(Phospho)	T(1): 0.0; S(7): 0.0; T(8): 0.0; S(12): 100.0; S(16): 0.0; S(20): 0.0; S(21): 0.0; S(23): 0.0; S(24): 0.0	0	8.611e-11
Q9NTI5	GHTASESDEQQWPEEK	S5(Phospho)	T(3): 0.0; S(5): 100.0; S(7): 0.0	0	8.762e-11
B2R9L6	KGSQITQQSTNQSR	S3(Phospho)	S(3): 100.0; T(6): 0.0; S(9): 0.0; T(10): 0.0; S(13): 0.0	0	8.853e-11
A8K6X9	GEEGSDDDETENGPKPK	S5(Phospho)	S(5): 100.0; T(10): 0.0	0	8.862e-11
B3KSQ7	SPSDSSTASTPVAEQIER	S3(Phospho)	S(1): 0.0; S(3): 100.0; S(5): 0.0; S(6): 0.0; T(7): 0.0; S(9): 0.0; T(10): 0.0	0	8.882e-11
A8K8N5	SYSSPDITQAIQEEEKR	S3(Phospho)	S(1): 0.0; Y(2): 0.0; S(3): 100.0; S(4): 0.0; T(8): 0.0	0	8.978e-11
P0CAP2	VSSQAEDTSSSFDNLFIDR	S3(Phospho)	S(2): 0.2; S(3): 99.8; T(8): 0.0; S(9): 0.0; S(10): 0.0; S(11): 0.0	0	9.006e-11
Q9Y4H2	QRPVPQPSSASLDEYTLMR	S11(Phospho)	S(8): 0.0; S(9): 0.0; S(11): 100.0; Y(15): 0.0; T(16): 0.0	0	9.063e-11
F8VZJ2	VQGEAVSNIQENTQTPTVQEESEEEEVDETGVEVK	S22(Phospho)	S(7): 0.0; T(13): 0.0; T(15): 0.0; T(17): 0.0; S(22): 100.0; T(30): 0.0	0	9.147e-11
Q9BTU6	VAAAAGSGPSPPGSPGHDR	S10(Phospho); S14(Phospho)	S(7): 0.0; S(10): 100.0; S(14): 100.0	0	9.181e-11
Q6P2E9	TRSPDVISSASTALSQDIPEIASEALSR	S3(Phospho)	T(1): 50.0; S(3): 50.0; S(8): 0.0; S(9): 0.0; S(11): 0.0; T(12): 0.0; S(15): 0.0; S(23): 0.0; S(27): 0.0	0	9.217e-11
Q68EM7	AESSSGGGTVPSSAGILEQGPSPGDGSPPKPK	S27(Phospho)	S(3): 0.0; S(4): 0.0; S(5): 0.0; T(9): 0.0; S(12): 0.0; S(13): 0.0; S(22): 0.0; S(27): 100.0	0	9.382e-11
A0A024R3E4	SQLPTLEQDGGTQNPVSSPGMSQELR	S18(Phospho)	S(1): 0.0; T(5): 0.0; T(12): 0.0; S(17): 0.0; S(18): 100.0; S(22): 0.0	0	9.501e-11
Q3LIB4	QRSPLLNQPVPELSHASLIANQSPFR	S3(Phospho)	S(3): 100.0; S(14): 0.0; S(17): 0.0; S(23): 0.0	0	9.527e-11
P28290	TLSTHSVPNISGATCSAFASPFGCPYSHR	T4(Phospho); C15(Carbamidomethyl); C24(Carbamidomethyl)	T(1): 33.3; S(3): 33.3; T(4): 33.3; S(6): 0.0; S(11): 0.0; T(14): 0.0; S(16): 0.0; S(20): 0.0; Y(26): 0.0; S(27): 0.0	0	9.592e-11
Q86XP3	QQFHSKPVDSDSDDDPLEAFMAEVEDQAAR	S10(Phospho); S12(Phospho)	S(5): 0.7; S(10): 99.3; S(12): 99.9	0	9.695e-11
Q13428	SPQVKPASTMGMGPLGK	S1(Phospho)	S(1): 100.0; S(8): 0.0; T(9): 0.0	0	9.809e-11
Q9C0C2	DTQSPSTCSEGLLGWSQK	S4(Phospho); C8(Carbamidomethyl)	T(2): 0.1; S(4): 99.9; S(6): 0.0; T(7): 0.0; S(9): 0.0; S(16): 0.0	0	9.877e-11
H3BQZ7	SKSPLPPEEEAKDEEEDQTLVNLDTYTSDLHFQVSK	S3(Phospho)	S(1): 6.2; S(3): 93.8; T(19): 0.0; T(25): 0.0; Y(26): 0.0; T(27): 0.0; S(28): 0.0; S(35): 0.0	0	9.896e-11
P28290	TPLGASLDEQSSSTLK	S6(Phospho)	T(1): 0.0; S(6): 100.0; S(11): 0.0; S(12): 0.0; S(13): 0.0; T(14): 0.0	0	9.918e-11
A0A024RD22	EKDSPHMQDPNQADEEAMTQIIR	S4(Phospho)	S(4): 100.0; T(19): 0.0	0	1.001e-10
Q9UKL0	EREESEDELEEANGNNPIDIEVDQNK	S5(Phospho)	S(5): 100.0	0	1.003e-10
F8W9S7	RTSPSDGAMANYESTEVMGDGESAHDSPR	S5(Phospho)	T(2): 2.7; S(3): 48.7; S(5): 48.7; Y(12): 0.0; S(14): 0.0; T(15): 0.0; S(23): 0.0; S(27): 0.0	0	1.015e-10
E9PQP7	IQQFDDGGSDEEDIWEEK	S9(Phospho)	S(9): 100.0	0	1.017e-10
E9PMS6	VTTEIQLPSQSPVEEQSPASLSSLR	S11(Phospho)	T(2): 0.0; T(3): 0.0; S(9): 0.2; S(11): 99.8; S(17): 0.0; S(20): 0.0; S(22): 0.0; S(23): 0.0	0	1.018e-10
A8K3C5	NEVNGTSEDIKSEGDTQSN	S18(Phospho)	T(6): 0.0; S(7): 0.0; S(12): 0.0; T(16): 0.0; S(18): 100.0	0	1.034e-10
H0YE35	GLMAGGRPEGQYSEDEDTDTDEYKEAK	S13(Phospho)	Y(12): 99.8; S(13): 0.2; T(18): 0.0; T(20): 0.0; Y(23): 0.0	0	1.038e-10
P58107	QVSASELHTSGILGPETLR	S3(Phospho)	S(3): 100.0; S(5): 0.0; T(9): 0.0; S(10): 0.0; T(17): 0.0	0	1.04e-10
M0QY17	SEGEGEAASADDGSLNTSGAGPK	S18(Phospho)	S(1): 0.0; S(9): 0.0; S(14): 33.3; T(17): 33.3; S(18): 33.3	0	1.051e-10
B2RAX6	KTSSDDESEEDEDDLLQR	S4(Phospho); S8(Phospho)	T(2): 0.0; S(3): 0.0; S(4): 100.0; S(8): 100.0	0	1.056e-10
B4DUS4	NINMDNDLEVLTSSPTR	S14(Phospho)	T(12): 0.0; S(13): 0.1; S(14): 97.7; T(16): 2.3	0	1.061e-10
O75369	APSVATVGSICDLNLK	S3(Phospho); C11(Carbamidomethyl)	S(3): 100.0; T(6): 0.0; S(9): 0.0	0	1.064e-10
Q09666	LKSEDGVEGDLGETQSR	S3(Phospho)	S(3): 100.0; T(14): 0.0; S(16): 0.0	0	1.078e-10
Q8NFC6	AGSISSEEVDGSQGNMMR	S3(Phospho)	S(3): 100.0; S(5): 0.0; S(6): 0.0; S(12): 0.0	0	1.081e-10
O43719	HFSEHPSTSKMNAQETATGMAFEEPIDEK	S3(Phospho); S7(Phospho)	S(3): 99.9; S(7): 91.5; T(8): 7.9; S(9): 0.7; T(16): 0.0; T(18): 0.0	0	1.085e-10
Q5VW31	KPEKPLFSSASPQDSSPR	S11(Phospho)	S(8): 0.0; S(9): 0.0; S(11): 100.0; S(15): 0.0; S(16): 0.0	0	1.103e-10
Q7Z417	GADNDGSGSESGYTTPK	S7(Phospho)	S(7): 100.0; S(9): 0.0; S(11): 0.0; Y(13): 0.0; T(14): 0.0; T(15): 0.0	0	1.107e-10
H0YKH0	DAPTSPASVASSSSTPSSK	S5(Phospho)	T(4): 0.0; S(5): 100.0; S(8): 0.0; S(11): 0.0; S(12): 0.0; S(13): 0.0; S(14): 0.0; T(15): 0.0; S(17): 0.0; S(18): 0.0	0	1.113e-10
Q59HF2	KAALPAATTPGPGLETAGPADAPAGAVVGGGSPR	S32(Phospho)	T(8): 0.0; T(9): 0.0; T(16): 0.0; S(32): 100.0	0	1.113e-10
A0A087X0R7	WTPKSPLDPDSGLLSCTLPNGFGGQSGPEGER	S5(Phospho); C16(Carbamidomethyl)	T(2): 0.5; S(5): 99.5; S(11): 0.0; S(15): 0.0; T(17): 0.0; S(26): 0.0	0	1.118e-10
G8JLD3	RTNSTGGSSGSSVGGGSGK	S4(Phospho)	T(2): 0.0; S(4): 99.9; T(5): 0.1; S(8): 0.0; S(9): 0.0; S(11): 0.0; S(12): 0.0; S(17): 0.0	0	1.12e-10
P36507	KPVLPALTINPTIAEGPSPTSEGASEANLVDLQK	S18(Phospho)	T(8): 0.0; T(12): 0.0; S(18): 5.6; T(20): 94.1; S(21): 0.3; S(25): 0.0	0	1.128e-10
Q6PK21	KVDEGAGDSAAVASGGAQTLALAGSPAPSGHPK	S25(Phospho)	S(9): 0.0; S(14): 0.0; T(19): 0.0; S(25): 100.0; S(29): 0.0	0	1.134e-10
A0A087WUR6	GDVMSTACGTPGYVAPEVLAQKPYSK	T6(Phospho); C8(Carbamidomethyl)	S(5): 5.8; T(6): 94.2; T(10): 0.0; Y(13): 0.0; Y(24): 0.0; S(25): 0.0	0	1.148e-10
B4E2K7	ENYSDSEEEDDDDVASSR	S4(Phospho); S6(Phospho)	Y(3): 0.0; S(4): 100.0; S(6): 100.0; S(16): 0.0; S(17): 0.0	0	1.156e-10
Q5T5U3	RNSEGSELSCTEGSLTSSLDSR	S3(Phospho); C10(Carbamidomethyl)	S(3): 100.0; S(6): 0.0; S(9): 0.0; T(11): 0.0; S(14): 0.0; T(16): 0.0; S(17): 0.0; S(18): 0.0; S(21): 0.0	0	1.161e-10
K4DI93	SATDGNTSTTPPTSAK	T10(Phospho)	S(1): 0.0; T(3): 0.0; T(7): 0.0; S(8): 0.0; T(9): 0.2; T(10): 99.7; T(13): 0.2; S(14): 0.0	0	1.161e-10
C9K098	RKPSVPDSASPADDSFVDPGER	S4(Phospho)	S(4): 100.0; S(8): 0.0; S(10): 0.0; S(15): 0.0	0	1.175e-10
P22059	GDMSDEDDENEFFDAPEIITMPENLGHK	S4(Phospho)	S(4): 100.0; T(20): 0.0	0	1.176e-10
Q13200	DKAPVQPQQSPAAAPGGTDEKPSGK	S10(Phospho)	S(10): 100.0; T(18): 0.0; S(23): 0.0	0	1.19e-10
Q6XZF7	HETSDHEAEEPDCIISEAPTSPLGHLTSEYDTDR	S4(Phospho); C13(Carbamidomethyl)	T(3): 6.4; S(4): 93.6; S(16): 0.0; T(20): 0.0; S(21): 0.0; T(27): 0.0; S(28): 0.0; Y(30): 0.0; T(32): 0.0	0	1.19e-10
Q9BTA9	SPSPGPNHTSNSSNASNATVVPQNSSAR	S10(Phospho)	S(1): 0.0; S(3): 6.0; T(9): 0.4; S(10): 93.6; S(12): 0.0; S(13): 0.0; S(16): 0.0; T(19): 0.0; S(25): 0.0; S(26): 0.0	0	1.193e-10
O95613	SECQDMSLSSPTSVLGGSR	C3(Carbamidomethyl); S10(Phospho)	S(1): 0.0; S(7): 0.0; S(9): 4.1; S(10): 91.7; T(12): 4.1; S(13): 0.2; S(18): 0.0	0	1.195e-10
B4DNW3	PGPREESEEEEDEDDEEEEEEEKEK	S7(Phospho)	S(7): 100.0	0	1.198e-10
H0YB24	SVASNQSEMEFSSLQDMPK	S1(Phospho); S4(Phospho)	S(1): 100.0; S(4): 100.0; S(7): 0.0; S(12): 0.0; S(13): 0.0	0	1.205e-10
B4DL66	LHNENAEMDSDSSSSGTETDLHGSLR	S12(Phospho); S13(Phospho)	S(10): 1.5; S(12): 99.1; S(13): 99.1; S(14): 0.2; S(15): 0.1; T(17): 0.0; T(19): 0.0; S(24): 0.0	0	1.206e-10
Q7Z309	MFVSSSGLPPSPVPSPR	S11(Phospho); S15(Phospho)	S(4): 0.0; S(5): 0.0; S(6): 0.0; S(11): 100.0; S(15): 100.0	0	1.219e-10
A0A087WY61	TQPDGTSVPGEPASPISQR	S14(Phospho)	T(1): 0.0; T(6): 0.0; S(7): 0.0; S(14): 99.9; S(17): 0.1	0	1.226e-10
B2RMV2	HSISGPISTSKPLTALSDK	S2(Phospho)	S(2): 100.0; S(4): 0.0; S(8): 0.0; T(9): 0.0; S(10): 0.0; T(14): 0.0; S(17): 0.0	0	1.228e-10
B4DHN0	VADPDHDHTGFLTEYVATR	Y15(Phospho)	T(9): 0.0; T(13): 0.0; Y(15): 100.0; T(18): 0.0	0	1.264e-10
Q9H2Y7	ENSPSSQSAGLSSINK	S3(Phospho)	S(3): 100.0; S(5): 0.0; S(6): 0.0; S(8): 0.0; S(12): 0.0; S(13): 0.0	0	1.281e-10
P25054	NDSLSSLDFDDDDVDLSR	S3(Phospho)	S(3): 100.0; S(5): 0.0; S(6): 0.0; S(17): 0.0	0	1.292e-10
B2RA03	LLEDGEDFNLGDALDSSNSMQTIQK	S17(Phospho)	S(16): 0.0; S(17): 100.0; S(19): 0.0; T(22): 0.0	0	1.32e-10
Q8TBB5	SEDEDSLEEAGSPAPGPCPR	S1(Phospho); C18(Carbamidomethyl)	S(1): 100.0; S(6): 0.0; S(12): 0.0	0	1.326e-10
P07900	ESEDKPEIEDVGSDEEEEK	S13(Phospho)	S(2): 0.0; S(13): 100.0	0	1.345e-10
B4DUS4	KTVEDEDQDSEEEKDNDSYIK	S10(Phospho)	T(2): 0.0; S(10): 100.0; S(18): 0.0; Y(19): 0.0	0	1.355e-10
B4DLR3	LQAALDDEEAGGRPAMEPGNGSLDLGGDSAGR	S22(Phospho)	S(22): 100.0; S(29): 0.0	0	1.369e-10
Q9Y3P9	QGDETPSTNNGSDDEK	S12(Phospho)	T(5): 0.0; S(7): 0.0; T(8): 0.0; S(12): 100.0	0	1.371e-10
Q9H1H9	KIDSEEEENELEAINR	S4(Phospho)	S(4): 100.0	0	1.408e-10
B3KUL5	HLSVGAPGVVTITHHKSPAAAR	S3(Phospho); S17(Phospho)	S(3): 100.0; T(11): 0.0; T(13): 0.3; S(17): 99.7	0	1.427e-10
Q9NTI5	LKEDILENEDEQNSPPK	S14(Phospho)	S(14): 100.0	0	1.433e-10
J3KQ45	DSPSKSSAEAQTPEDTPNK	S7(Phospho)	S(2): 0.0; S(4): 0.0; S(6): 0.0; S(7): 100.0; T(12): 0.0; T(16): 0.0	0	1.446e-10
P80723	AQGPAASAEEPKPVEAPAANSDQTVTVKE	S21(Phospho)	S(7): 0.0; S(21): 99.7; T(24): 0.3; T(26): 0.0	0	1.447e-10
B7ZM65	TVTCVTVVEPEAPPSPDVLQAATHR	C4(Carbamidomethyl); S15(Phospho)	T(1): 0.0; T(3): 0.0; T(6): 0.0; S(15): 100.0; T(23): 0.0	0	1.449e-10
A0A024RD92	HSSTGDSADAGPPAAGSAR	S3(Phospho)	S(2): 0.1; S(3): 99.8; T(4): 0.1; S(7): 0.0; S(17): 0.0	0	1.454e-10
P09651	NQGGYGGSSSSSSYGSGR	S9(Phospho)	Y(5): 0.0; S(8): 0.1; S(9): 97.0; S(10): 2.9; S(11): 0.0; S(12): 0.0; S(13): 0.0; Y(14): 0.0; S(16): 0.0	0	1.455e-10
Q9H3Q1	AGEPDGESLDEQPSSSSSK	S8(Phospho)	S(8): 100.0; S(14): 0.0; S(15): 0.0; S(16): 0.0; S(17): 0.0; S(18): 0.0	0	1.458e-10
P06748	CGSGPVHISGQHLVAVEEDAESEDEEEEDVKLLSISGK	C1(Carbamidomethyl); S22(Phospho)	S(3): 0.0; S(9): 0.0; S(22): 100.0; S(34): 0.0; S(36): 0.0	0	1.473e-10
A8K5W5	KVQSTADIFGDEEGDLFKEK	T5(Phospho)	S(4): 3.1; T(5): 96.9	0	1.479e-10
Q5UIP0	RASQGLLSSIENSESDSSEAK	S3(Phospho)	S(3): 100.0; S(8): 0.0; S(9): 0.0; S(13): 0.0; S(15): 0.0; S(17): 0.0; S(18): 0.0	0	1.535e-10
Q155Q3	NSSMDEEIENPYWSVR	S3(Phospho)	S(2): 0.1; S(3): 99.9; Y(12): 0.0; S(14): 0.0	0	1.561e-10
B2RTX8	VEEESTGDPFGFDSDDESLPVSSK	S14(Phospho)	S(5): 0.0; T(6): 0.0; S(14): 100.0; S(18): 0.0; S(22): 0.0; S(23): 0.0	0	1.573e-10
Q9Y4B5	SLYGDVDSPLPTGEAGGPPSTR	S8(Phospho)	S(1): 0.0; Y(3): 0.0; S(8): 100.0; T(12): 0.0; S(20): 0.0; T(21): 0.0	0	1.583e-10
Q86UU0	RPSDLTISINQMGSPGMGHLK	S3(Phospho)	S(3): 99.8; T(6): 0.2; S(8): 0.0; S(14): 0.0	0	1.588e-10
E9PM92	RSASPDDDLGSSNWEAADLGNEER	S4(Phospho)	S(2): 0.2; S(4): 99.8; S(11): 0.0; S(12): 0.0	0	1.596e-10
A8K5A5	APYQENDGYCPDLELSDSEAESDGNKEK	C10(Carbamidomethyl); S16(Phospho)	Y(3): 0.0; Y(9): 0.0; S(16): 100.0; S(18): 0.0; S(22): 0.0	0	1.597e-10
Q9UKL0	EREESEDELEEANGNNPIDIEVDQNKESK	S5(Phospho)	S(5): 100.0; S(28): 0.0	0	1.611e-10
Q07157	SHSLAQPPEFDSGVETFSIHAEKPK	S3(Phospho)	S(1): 4.5; S(3): 95.5; S(12): 0.0; T(16): 0.0; S(18): 0.0	0	1.626e-10
H3BTX0	DLFSLDSEDPSPASPPLR	S14(Phospho)	S(4): 0.0; S(7): 0.0; S(11): 0.0; S(14): 100.0	0	1.627e-10
Q92766	ANSGGVDLDSSGEFASIEK	S3(Phospho)	S(3): 100.0; S(10): 0.0; S(11): 0.0; S(16): 0.0	0	1.629e-10
Q15149	SSSVGSSSSYPISPAVSR	S3(Phospho); S6(Phospho)	S(1): 0.2; S(2): 0.2; S(3): 99.6; S(6): 99.8; S(7): 0.2; S(8): 0.0; S(9): 0.0; Y(10): 0.0; S(13): 0.0; S(17): 0.0	0	1.639e-10
C9J3R1	YFDNKDDDSDTETSNDLPK	S9(Phospho)	Y(1): 0.0; S(9): 97.1; T(11): 2.9; T(13): 0.0; S(14): 0.0	0	1.646e-10
Q9H8Y5	LAAQLGAPTSPIPDSAIVNTR	S10(Phospho)	T(9): 0.2; S(10): 99.8; S(15): 0.0; T(20): 0.0	0	1.65e-10
C9JE98	SSGAPQDSDSSATCSADEVDEAEGGDKNR	C14(Carbamidomethyl); S15(Phospho)	S(1): 0.0; S(2): 0.0; S(8): 0.0; S(10): 0.0; S(11): 0.0; T(13): 0.3; S(15): 99.7	0	1.676e-10
O95817	VPPAPVPCPPPSPGPSAVPSSPK	C8(Carbamidomethyl); S12(Phospho); S21(Phospho)	S(12): 100.0; S(16): 0.0; S(20): 0.1; S(21): 99.9	0	1.682e-10
H3BM38	TTWGDGGENSPCNVVSK	S10(Phospho); C12(Carbamidomethyl)	T(1): 0.0; T(2): 0.0; S(10): 100.0; S(16): 0.0	0	1.689e-10
Q8NCF5	KKTEFLDLDNSPLSPPSPR	S17(Phospho)	T(3): 0.0; S(11): 0.0; S(14): 0.0; S(17): 100.0	0	1.694e-10
Q9UHR4	LLEENETEAVTVPTPSPTPVR	S16(Phospho)	T(7): 0.0; T(11): 0.0; T(14): 0.0; S(16): 95.7; T(18): 4.3	0	1.703e-10
Q99549	GAEAFGDSEEDGEDVFEVEK	S8(Phospho)	S(8): 100.0	0	1.731e-10
A8K6N7	QQSLGGSESPGPAPCSPGLSASPASSPGR	S3(Phospho); C15(Carbamidomethyl)	S(3): 92.9; S(7): 6.6; S(9): 0.5; S(16): 0.0; S(20): 0.0; S(22): 0.0; S(25): 0.0; S(26): 0.0	0	1.743e-10
E9PMS6	EVAATEEDVTRLPSPTSPFSSLSQDQAATSK	S14(Phospho); T16(Phospho)	T(5): 0.0; T(10): 0.0; S(14): 99.6; T(16): 6.8; S(17): 93.7; S(20): 0.0; S(21): 0.0; S(23): 0.0; T(29): 0.0; S(30): 0.0	0	1.744e-10
Q6PKG0	NTFTAWSDEESDYEIDDR	S7(Phospho)	T(2): 0.0; T(4): 0.0; S(7): 100.0; S(11): 0.0; Y(13): 0.0	0	1.747e-10
B3KN82	KHIKEEPLSEEEPCTSTAIASPEK	S9(Phospho); C14(Carbamidomethyl)	S(9): 100.0; T(15): 0.0; S(16): 0.0; T(17): 0.0; S(21): 0.0	0	1.758e-10
B4E265	KNSAPQLPLLQSSGPFVEGSIVR	S3(Phospho)	S(3): 100.0; S(12): 0.0; S(13): 0.0; S(20): 0.0	0	1.771e-10
O94804	QVAEQGGDLSPAANR	S10(Phospho)	S(10): 100.0	0	1.795e-10
Q9C0B0	NSSLGSPSNLCGSPPGSIR	C11(Carbamidomethyl); S13(Phospho)	S(2): 0.0; S(3): 0.0; S(6): 0.0; S(8): 0.0; S(13): 100.0; S(17): 0.0	0	1.809e-10
A0A087WV66	SGGSGHAVAEPASPEQELDQNKGK	S13(Phospho)	S(1): 0.0; S(4): 0.0; S(13): 100.0	0	1.823e-10
Q3LIB4	HAPTYTIPLSPVLSPTLPAEAPTAQVPPSLPR	S10(Phospho); S14(Phospho)	T(4): 0.0; Y(5): 0.0; T(6): 0.0; S(10): 100.0; S(14): 100.0; T(16): 0.0; T(23): 0.0; S(29): 0.0	0	1.834e-10
P45973	TADSSSSEDEEEYVVEK	S7(Phospho)	T(1): 0.0; S(4): 0.0; S(5): 0.0; S(6): 0.1; S(7): 99.9; Y(13): 0.0	0	1.836e-10
E9PMS6	SKSMSDVSAEDVQNLR	S3(Phospho)	S(1): 0.0; S(3): 100.0; S(5): 0.0; S(8): 0.0	0	1.843e-10
D3DVC4	ENQEPLRSPEVGDEEALRPLTK	S8(Phospho)	S(8): 100.0; T(21): 0.0	0	1.853e-10
Q8IVT2	AVPTWASVQVVDDPGSLASVESPGTPK	S22(Phospho)	T(4): 0.0; S(7): 0.0; S(16): 0.0; S(19): 0.0; S(22): 100.0; T(25): 0.0	0	1.922e-10
Q5UW39	KSSTVESEIASEEK	S3(Phospho)	S(2): 0.1; S(3): 99.9; T(4): 0.0; S(7): 0.0; S(11): 0.0	0	1.926e-10
Q96RK0	KNSTDLDSAPEDPTSPK	S3(Phospho); S15(Phospho)	S(3): 100.0; T(4): 0.0; S(8): 0.0; T(14): 4.6; S(15): 95.4	0	1.932e-10
Q5VT52	DVEDMELSDVEDDGSK	S8(Phospho)	S(8): 100.0; S(15): 0.0	0	1.934e-10
Q9H2Y7	EPHSPADQPEQQAESTLTSAETR	S4(Phospho)	S(4): 100.0; S(15): 0.0; T(16): 0.0; T(18): 0.0; S(19): 0.0; T(22): 0.0	0	1.944e-10
O43719	VFDDESDEKEDEEYADEK	S6(Phospho)	S(6): 100.0; Y(14): 0.0	0	1.995e-10
M0R3F1	GRSPQPPAEEDEDDFDDTLVAIDTYNCDLHFK	S3(Phospho); C27(Carbamidomethyl)	S(3): 100.0; T(18): 0.0; T(24): 0.0; Y(25): 0.0	0	2.024e-10
P27448	LDTFCGSPPYAAPELFQGK	T3(Phospho); C5(Carbamidomethyl)	T(3): 100.0; S(7): 0.0; Y(10): 0.0	0	2.025e-10
Q14191	HLSPNDNENDTSYVIESDEDLEMEMLK	S17(Phospho)	S(3): 0.0; T(11): 0.0; S(12): 0.0; Y(13): 0.0; S(17): 100.0	0	2.125e-10
Q53GG0	SKEGHSLEMENENLVENGADSDEDDNSFLK	S21(Phospho)	S(1): 0.0; S(6): 0.0; S(21): 100.0; S(27): 0.0	0	2.141e-10
Q96FS1	SQSSHSYDDSTLPLIDR	S6(Phospho)	S(1): 0.0; S(3): 0.0; S(4): 0.0; S(6): 99.9; Y(7): 0.1; S(10): 0.0; T(11): 0.0	0	2.142e-10
D3DUP2	EKPELSEPSHLNGPSSDPEAAFLSR	S15(Phospho)	S(6): 0.0; S(9): 0.0; S(15): 94.6; S(16): 5.4; S(24): 0.0	0	2.176e-10
Q9UBB9	GAAEEAELEDSDDEEKPVK	S11(Phospho)	S(11): 100.0	0	2.178e-10
P24534	DDDDIDLFGSDDEEESEEAK	S10(Phospho)	S(10): 100.0; S(16): 0.0	0	2.184e-10
E9PMR6	TASQGPQTDSVIQNSENIK	S3(Phospho)	T(1): 0.1; S(3): 99.9; T(8): 0.0; S(10): 0.0; S(15): 0.0	0	2.188e-10
A9UEZ6	SSESSCGVDGDYEDAELNPR	S1(Phospho); C6(Carbamidomethyl)	S(1): 95.4; S(2): 4.6; S(4): 0.0; S(5): 0.0; Y(12): 0.0	0	2.235e-10
E7EWD6	QSDGQTGSPQNSNSSFSSSVK	S8(Phospho)	S(2): 0.0; T(6): 5.0; S(8): 95.0; S(12): 0.0; S(14): 0.0; S(15): 0.0; S(17): 0.0; S(18): 0.0; S(19): 0.0	0	2.249e-10
O94979	EQTLSPTITSGLHNIAR	S5(Phospho)	T(3): 0.0; S(5): 100.0; T(7): 0.0; T(9): 0.0; S(10): 0.0	0	2.25e-10
Q5JSH3	TKEYVSNDAAQSDDEEKLQSQPTDTDGGR	S12(Phospho)	T(1): 0.0; Y(4): 0.0; S(6): 0.0; S(12): 100.0; S(20): 0.0; T(23): 0.0; T(25): 0.0	0	2.271e-10
Q96KQ7	KLNSGGGLSEELGSAR	S4(Phospho)	S(4): 100.0; S(9): 0.0; S(14): 0.0	0	2.287e-10
P35606	STAQQELDGKPASPTPVIVASHTANK	S13(Phospho)	S(1): 0.0; T(2): 0.0; S(13): 94.0; T(15): 6.0; S(21): 0.0; T(23): 0.0	0	2.29e-10
G3V1N5	IPQMESSTNSSSQDYSTSQEPSVASSHGVR	S12(Phospho)	S(6): 0.2; S(7): 0.2; T(8): 0.2; S(10): 33.2; S(11): 33.2; S(12): 33.2; Y(15): 0.0; S(16): 0.0; T(17): 0.0; S(18): 0.0; S(22): 0.0; S(25): 0.0; S(26): 0.0	0	2.291e-10
Q05DC0	KALVVPEPEPDSDSNQER	S14(Phospho)	S(12): 0.0; S(14): 100.0	0	2.297e-10
F8VVL1	LTVENSPKQEAGISEGQGTAGEEEEK	S6(Phospho)	T(2): 50.0; S(6): 50.0; S(14): 0.0; T(19): 0.0	0	2.335e-10
Q02241	RSSTVAPAQPDGAESEWTDVETR	S2(Phospho)	S(2): 48.8; S(3): 48.8; T(4): 2.5; S(15): 0.0; T(18): 0.0; T(22): 0.0	0	2.343e-10
A0A024R0X0	SGSLDDSFSDFQELPASSK	S7(Phospho)	S(1): 0.0; S(3): 0.0; S(7): 100.0; S(9): 0.0; S(17): 0.0; S(18): 0.0	0	2.364e-10
B4E027	QNSTPESDYDNTPNDMEPDGMGSSR	S3(Phospho)	S(3): 95.2; T(4): 4.8; S(7): 0.0; Y(9): 0.0; T(12): 0.0; S(23): 0.0; S(24): 0.0	0	2.4e-10
Q9UEJ3	SVSPTTEMVSNESVDYR	S1(Phospho)	S(1): 99.9; S(3): 0.1; T(5): 0.0; T(6): 0.0; S(10): 0.0; S(13): 0.0; Y(16): 0.0	0	2.47e-10
B4DRN8	LVGMDPEQASVTNQNEYAR	S10(Phospho)	S(10): 99.9; T(12): 0.1; Y(17): 0.0	0	2.513e-10
Q92551	HLDMVLPEVASSCGPSTSPSNTSPEAGPSSQPK	C13(Carbamidomethyl); S18(Phospho)	S(11): 0.0; S(12): 0.0; S(16): 0.0; T(17): 0.0; S(18): 99.9; S(20): 0.0; T(22): 0.0; S(23): 0.0; S(29): 0.0; S(30): 0.0	0	2.525e-10
A0A087WU09	RGPSPACSDSSTLALIHSALHK	S4(Phospho); C7(Carbamidomethyl)	S(4): 100.0; S(8): 0.0; S(10): 0.0; S(11): 0.0; T(12): 0.0; S(18): 0.0	0	2.569e-10
B7Z2K7	GFSFVATGLMEDDGKPR	S3(Phospho)	S(3): 100.0; T(7): 0.0	0	2.574e-10
M0QYL4	VDSEGDFSENDDAAGDFR	S8(Phospho)	S(3): 0.0; S(8): 100.0	0	2.582e-10
Q5QNY5	NATDLQNSSMSEEELTK	S9(Phospho)	T(3): 0.0; S(8): 0.0; S(9): 50.0; S(11): 50.0; T(16): 0.0	0	2.586e-10
Q96ST2	AAVLSDSEDEEKASAK	S7(Phospho)	S(5): 0.0; S(7): 100.0; S(14): 0.0	0	2.615e-10
Q96T88	ERDSELSDTDSGCCLGQSESDK	S7(Phospho); C13(Carbamidomethyl); C14(Carbamidomethyl)	S(4): 0.0; S(7): 100.0; T(9): 0.0; S(11): 0.0; S(18): 0.0; S(20): 0.0	0	2.677e-10
H3BQM0	HSSNSSSGPVSSSSATQSSSSDVDSDATPCK	S21(Phospho); C30(Carbamidomethyl)	S(2): 0.0; S(3): 0.0; S(5): 0.0; S(6): 0.0; S(7): 0.0; S(11): 0.0; S(12): 0.0; S(13): 0.0; S(14): 0.0; T(16): 0.0; S(18): 0.0; S(19): 0.0; S(20): 0.5; S(21): 99.5; S(25): 0.0; T(28): 0.0	0	2.689e-10
R4GNH9	LCNLEEGSPGSGTYTR	C2(Carbamidomethyl); S8(Phospho)	S(8): 100.0; S(11): 0.0; T(13): 0.0; Y(14): 0.0; T(15): 0.0	0	2.696e-10
B7Z9D0	AESSDSGAESEEEEAQEEVK	S6(Phospho); S10(Phospho)	S(3): 0.0; S(4): 0.0; S(6): 100.0; S(10): 100.0	0	2.762e-10
Q14814	KGFNGCDSPEPDGEDSLEQSPLLEDK	C6(Carbamidomethyl); S8(Phospho)	S(8): 100.0; S(16): 0.0; S(20): 0.0	0	2.786e-10
Q6ZMK4	MNSQDSNTSVLEVVSEKPLSER	S3(Phospho)	S(3): 100.0; S(6): 0.0; T(8): 0.0; S(9): 0.0; S(15): 0.0; S(20): 0.0	0	2.813e-10
B2RNT9	TVSQQSFDGVSLDSSGPEDR	S3(Phospho)	T(1): 4.0; S(3): 96.0; S(6): 0.0; S(11): 0.0; S(14): 0.0; S(15): 0.0	0	2.825e-10
Q6P2E9	GPGQVPTATSALSLELQEVEPLGLPQASPSR	S28(Phospho)	T(7): 0.0; T(9): 0.0; S(10): 0.0; S(13): 0.0; S(28): 5.2; S(30): 94.8	0	2.849e-10
Q9H6E5	TRSEGGGTGESSQGGTSK	S3(Phospho)	T(1): 0.0; S(3): 100.0; T(8): 0.0; S(11): 0.0; S(12): 0.0; T(16): 0.0; S(17): 0.0	0	2.894e-10
O75369	LVSPGSANETSSILVESVTR	S3(Phospho)	S(3): 100.0; S(6): 0.0; T(10): 0.0; S(11): 0.0; S(12): 0.0; S(17): 0.0; T(19): 0.0	0	2.901e-10
Q9H4L5	TYSAPAINAIQGGSFESPK	S3(Phospho)	T(1): 0.0; Y(2): 0.0; S(3): 100.0; S(14): 0.0; S(17): 0.0	0	2.921e-10
Q13501	IALESEGRPEEQMESDNCSGGDDDWTHLSSK	S15(Phospho); C18(Carbamidomethyl)	S(5): 0.0; S(15): 100.0; S(19): 0.0; T(26): 0.0; S(29): 0.0; S(30): 0.0	0	2.924e-10
H0Y4V9	TLSADASVNTLPVVVSR	S3(Phospho)	T(1): 0.0; S(3): 100.0; S(7): 0.0; T(10): 0.0; S(16): 0.0	0	2.98e-10
P46063	QCLEDSDAGASNEYDSSPAAWNKEDFPWSGK	C2(Carbamidomethyl); S17(Phospho)	S(6): 2.6; S(11): 24.3; Y(14): 24.3; S(16): 24.3; S(17): 24.3; S(29): 0.0	0	3.013e-10
A0A024R2A4	LQITPDSNGEQFSSLIQR	T4(Phospho)	T(4): 100.0; S(7): 0.0; S(13): 0.0; S(14): 0.0	0	3.037e-10
B3KXX3	LTSIGSDEDEETETYQEK	S6(Phospho)	T(2): 0.0; S(3): 0.0; S(6): 100.0; T(12): 0.0; T(14): 0.0; Y(15): 0.0	0	3.047e-10
Q96JM3	GQESSSDQEQVDVESIDFSK	S4(Phospho); S6(Phospho)	S(4): 94.0; S(5): 11.9; S(6): 94.0; S(15): 0.0; S(19): 0.0	0	3.066e-10
P46019	SSTPSSPTGTSSSDSGGHHIGWGER	S6(Phospho)	S(1): 5.7; S(2): 0.4; T(3): 5.7; S(5): 5.7; S(6): 82.4; T(8): 0.0; T(10): 0.0; S(11): 0.0; S(12): 0.0; S(13): 0.0; S(15): 0.0	0	3.108e-10
Q9UQ35	AGMSSNQSISSPVLDAVPR	S11(Phospho)	S(4): 0.0; S(5): 0.0; S(8): 0.0; S(10): 0.1; S(11): 99.9	0	3.119e-10
Q6PKG0	KNTFTAWSDEESDYEIDDRDVNK	S8(Phospho)	T(3): 0.0; T(5): 0.0; S(8): 100.0; S(12): 0.0; Y(14): 0.0	0	3.142e-10
Q59FL8	RPAGSVQNPVYHNQPLNPAPSR	Y11(Phospho)	S(5): 0.0; Y(11): 100.0; S(21): 0.0	0	3.145e-10
B3KXX3	LTSIGSDEDEETETYQEK	S3(Phospho); S6(Phospho)	T(2): 0.0; S(3): 100.0; S(6): 100.0; T(12): 0.0; T(14): 0.0; Y(15): 0.0	0	3.152e-10
B4DKX4	RKDSVWGSGGGQQSVNHLVK	S4(Phospho)	S(4): 100.0; S(8): 0.0; S(14): 0.0	0	3.157e-10
B5BUC0	TTSFAESCKPVQQPSAFGSMK	S3(Phospho); C8(Carbamidomethyl)	T(1): 0.0; T(2): 0.0; S(3): 100.0; S(7): 0.0; S(15): 0.0; S(19): 0.0	0	3.168e-10
B4DKX4	KDSVWGSGGGQQSVNHLVK	S3(Phospho)	S(3): 100.0; S(7): 0.0; S(13): 0.0	0	3.176e-10
Q9Y4H2	SQSSGSSATHPISVPGAR	S1(Phospho)	S(1): 100.0; S(3): 0.0; S(4): 0.0; S(6): 0.0; S(7): 0.0; T(9): 0.0; S(13): 0.0	0	3.19e-10
B4DL02	QAVGGAGPPNPAINGSAPR	S16(Phospho)	S(16): 100.0	0	3.24e-10
O95613	KGSAVDASVQEESPVTK	S3(Phospho)	S(3): 100.0; S(8): 0.0; S(13): 0.0; T(16): 0.0	0	3.279e-10
A8K6X9	HPKGEEGSDDDETENGPKPK	S8(Phospho)	S(8): 100.0; T(13): 0.0	0	3.294e-10
B2RB95	ATAQPPAPLSPDSGSPSPDSGSASPVEEEDVGSSEK	S10(Phospho)	T(2): 0.0; S(10): 99.0; S(13): 0.1; S(15): 0.9; S(17): 0.0; S(20): 0.0; S(22): 0.0; S(24): 0.0; S(33): 0.0; S(34): 0.0	0	3.306e-10
E7EX40	DSGSDTASAIIPSTTPSVDSDDESVVK	S20(Phospho)	S(2): 0.0; S(4): 0.0; T(6): 0.0; S(8): 0.0; S(13): 0.0; T(14): 0.0; T(15): 0.0; S(17): 0.0; S(20): 4.9; S(24): 95.1	0	3.306e-10
Q12888	TSSGTSLSAMHSSGSSGK	S3(Phospho)	T(1): 0.2; S(2): 0.2; S(3): 99.6; T(5): 0.0; S(6): 0.0; S(8): 0.0; S(12): 0.0; S(13): 0.0; S(15): 0.0; S(16): 0.0	0	3.311e-10
Q09666	ASLGSLEGEAEAEASSPK	S15(Phospho)	S(2): 0.0; S(5): 0.0; S(15): 50.0; S(16): 50.0	0	3.365e-10
A0A087WUT6	QSFDDNDSEELEDKDSK	S8(Phospho)	S(2): 0.0; S(8): 100.0; S(16): 0.0	0	3.381e-10
A0A087WUU7	ESSFEESNIEDPLIVTPDCQEKTSPK	C19(Carbamidomethyl); S24(Phospho)	S(2): 0.0; S(3): 0.0; S(7): 0.0; T(16): 0.0; T(23): 50.0; S(24): 50.0	0	3.392e-10
Q71UH4	KVVEAVNSDSDSEFGIPK	S8(Phospho); S10(Phospho)	S(8): 100.0; S(10): 100.0; S(12): 0.0	0	3.392e-10
Q9UKJ3	KPSVSEEVQATPNK	S3(Phospho)	S(3): 100.0; S(5): 0.0; T(11): 0.0	0	3.403e-10
H3BPE1	RGSDASDFDLLETQSACSDTSESSAAGGQGNSR	S3(Phospho); C17(Carbamidomethyl)	S(3): 94.3; S(6): 5.7; T(13): 0.0; S(15): 0.0; S(18): 0.0; T(20): 0.0; S(21): 0.0; S(23): 0.0; S(24): 0.0; S(32): 0.0	0	3.41e-10
Q5JTV8	GLRDSHSSEEDEASSQTDLSQTISK	S5(Phospho)	S(5): 99.8; S(7): 0.2; S(8): 0.0; S(14): 0.0; S(15): 0.0; T(17): 0.0; S(20): 0.0; T(22): 0.0; S(24): 0.0	0	3.419e-10
H0YDN2	IPYQSPVSSSESAPGTIMNGHGGGR	S5(Phospho)	Y(3): 5.5; S(5): 5.5; S(8): 83.0; S(9): 5.5; S(10): 0.4; S(12): 0.0; T(16): 0.0	0	3.43e-10
C9JXU1	QATPLLYALAAEAEAAAQAAEPPSPPASR	S24(Phospho)	T(3): 0.0; Y(7): 0.0; S(24): 50.0; S(28): 50.0	0	3.438e-10
B4DHL7	SLRGSDALSETSSVSHIEDLEK	S5(Phospho)	S(1): 4.5; S(5): 95.5; S(9): 0.0; T(11): 0.0; S(12): 0.0; S(13): 0.0; S(15): 0.0	0	3.452e-10
Q99549	GYTSDDDTWEPEIHLEDCK	S4(Phospho); C18(Carbamidomethyl)	Y(2): 0.0; T(3): 0.0; S(4): 100.0; T(8): 0.0	0	3.476e-10
B4DP23	AADSDDGAVSAPAASDGER	S4(Phospho)	S(4): 100.0; S(10): 0.0; S(15): 0.0	0	3.497e-10
F8VX32	GLSPLPSPPEMMPTSPQSPR	S15(Phospho)	S(3): 0.0; S(7): 0.0; T(14): 4.3; S(15): 95.7; S(18): 0.0	0	3.528e-10
O43719	LFEESDDKEDEDADGK	S5(Phospho)	S(5): 100.0	0	3.571e-10
P05387	LASVPAGGAVAVSAAPGSAAPAAGSAPAAAEEK	S25(Phospho)	S(3): 0.0; S(13): 0.0; S(18): 0.0; S(25): 100.0	0	3.595e-10
Q9UQ35	VKAQTPPGPSLSGSKSPCPQEK	T5(Phospho); S16(Phospho); C18(Carbamidomethyl)	T(5): 100.0; S(10): 0.0; S(12): 0.0; S(14): 0.0; S(16): 100.0	0	3.617e-10
Q96RT1	IRQEDENFNSLLQNGDILNSSTEEK	S21(Phospho)	S(10): 0.0; S(20): 49.9; S(21): 49.9; T(22): 0.1	0	3.647e-10
Q9UPR0	LSSNCSGVEGDVTDEDEGAEMSQR	C5(Carbamidomethyl); T13(Phospho)	S(2): 0.0; S(3): 0.0; S(6): 0.0; T(13): 100.0; S(22): 0.0	0	3.656e-10
Q7Z3D7	GLVAAYSGESDSEEEQER	S10(Phospho)	Y(6): 0.0; S(7): 0.0; S(10): 97.7; S(12): 2.3	0	3.686e-10
Q9NY27	NHSDSSTSESEVSSVSPLKNKHPDEDAVEAEGHEVK	S16(Phospho)	S(3): 0.1; S(5): 7.3; S(6): 78.1; T(7): 7.3; S(8): 7.3; S(10): 0.0; S(13): 0.0; S(14): 0.0; S(16): 0.1	0	3.694e-10
Q4LE79	RASSKGGGGYTCQSGSGWDEFTK	S3(Phospho); S4(Phospho); C12(Carbamidomethyl)	S(3): 100.0; S(4): 100.0; Y(10): 0.0; T(11): 0.0; S(14): 0.0; S(16): 0.0; T(22): 0.0	0	3.708e-10
Q7Z3D7	HDYDDSSEEQSAEDSYEASPGSETQR	S6(Phospho); S7(Phospho)	Y(3): 0.3; S(6): 99.7; S(7): 100.0; S(11): 0.0; S(15): 0.0; Y(16): 0.0; S(19): 0.0; S(22): 0.0; T(24): 0.0	0	3.768e-10
Q9H1E3	SGKNSQEDSEDSEDKDVK	S5(Phospho)	S(1): 0.0; S(5): 100.0; S(9): 0.0; S(12): 0.0	0	3.777e-10
O00299	VLDNYLTSPLPEEVDETSAEDEGVSQR	S18(Phospho)	Y(5): 0.0; T(7): 0.0; S(8): 0.0; T(17): 0.0; S(18): 100.0; S(25): 0.0	0	3.782e-10
Q59GB9	IACDEEFSDSEDEGEGGR	C3(Carbamidomethyl); S8(Phospho)	S(8): 96.8; S(10): 3.2	0	3.808e-10
P61073	GGHSSVSTESESSSFHSS	S18(Phospho)	S(4): 0.0; S(5): 0.0; S(7): 0.0; T(8): 0.0; S(10): 0.0; S(12): 0.0; S(13): 0.0; S(14): 0.0; S(17): 50.0; S(18): 50.0	0	3.826e-10
Q8NCZ0	VKLESPTVSTLTPSSPGK	S15(Phospho)	S(5): 0.0; T(7): 0.0; S(9): 0.0; T(10): 0.0; T(12): 0.0; S(14): 0.1; S(15): 99.9	0	3.855e-10
J3QQW9	ASMSEFLESEDGEVEQQR	S9(Phospho)	S(2): 0.0; S(4): 0.0; S(9): 100.0	0	3.936e-10
P16383	VLSGNCNHQEGTSSDDELPSAEMIDFQK	C6(Carbamidomethyl); T12(Phospho); S14(Phospho)	S(3): 0.0; T(12): 100.0; S(13): 50.0; S(14): 50.0; S(20): 0.0	0	3.955e-10
P41227	GLAAEDSGGDSKDLSEVSETTESTDVK	S7(Phospho)	S(7): 100.0; S(11): 0.0; S(15): 0.0; S(18): 0.0; T(20): 0.0; T(21): 0.0; S(23): 0.0; T(24): 0.0	0	3.963e-10
P55081	SLAALDALNTDDENDEEEYEAWK	T10(Phospho)	S(1): 0.0; T(10): 100.0; Y(19): 0.0	0	4.01e-10
Q5JSH3	SDTDTGVCSGTDEDPDDKNAPFR	C8(Carbamidomethyl); S9(Phospho)	S(1): 0.0; T(3): 0.0; T(5): 0.0; S(9): 100.0; T(11): 0.0	0	4.013e-10
P78310	SYIGSNHSSLGSMSPSNMEGYSK	S1(Phospho)	S(1): 50.0; Y(2): 50.0; S(5): 0.0; S(8): 0.0; S(9): 0.0; S(12): 0.0; S(14): 0.0; S(16): 0.0; Y(21): 0.0; S(22): 0.0	0	4.017e-10
Q13541	DLPTIPGVTSPSSDEPPMEASQSHLR	S10(Phospho)	T(4): 0.0; T(9): 48.1; S(10): 48.1; S(12): 3.4; S(13): 0.3; S(21): 0.0; S(23): 0.0	0	4.073e-10
B7Z3B0	EAEEGPTGASESQDSPR	S15(Phospho)	T(7): 0.0; S(10): 0.0; S(12): 0.0; S(15): 100.0	0	4.103e-10
Q8WWM7	RPPGGTSPPNGGLPGPLATSAAPPGPPAAASPCLGPVAAAGSGLR	T6(Phospho); C33(Carbamidomethyl)	T(6): 50.0; S(7): 50.0; T(19): 0.0; S(20): 0.0; S(31): 0.0; S(42): 0.0	0	4.11e-10
Q13541	NSPVTKTPPRDLPTIPGVTSPSSDEPPMEASQSHLR	T7(Phospho)	S(2): 0.0; T(5): 0.4; T(7): 99.5; T(14): 0.0; T(19): 0.0; S(20): 0.0; S(22): 0.0; S(23): 0.0; S(31): 0.0; S(33): 0.0	0	4.115e-10
B4DLG2	KVEAPETNIDKTPK	T12(Phospho)	T(7): 0.0; T(12): 100.0	0	4.138e-10
P45974	SAADSISESVPVGPK	S5(Phospho)	S(1): 0.0; S(5): 100.0; S(7): 0.0; S(9): 0.0	0	4.143e-10
Q5JSZ5	EKEQSPTAEKDEDEENDASLANSSTTTLEDK	S5(Phospho)	S(5): 93.6; T(7): 6.4; S(19): 0.0; S(23): 0.0; S(24): 0.0; T(25): 0.0; T(26): 0.0; T(27): 0.0	0	4.16e-10
F8W038	KVYEDSGIPLPAESPK	S14(Phospho)	Y(3): 0.0; S(6): 0.0; S(14): 100.0	0	4.161e-10
O00267	SAAGSEKEEEPEDEEEEEEEEEYDEEEEEEDDDRPPK	S5(Phospho)	S(1): 0.7; S(5): 99.3; Y(23): 0.0	0	4.211e-10
Q12774	YYSPCEEHPAETNQNEGSESGTIR	S3(Phospho); C5(Carbamidomethyl)	Y(1): 0.3; Y(2): 0.0; S(3): 99.7; T(12): 0.0; S(18): 0.0; S(20): 0.0; T(22): 0.0	0	4.221e-10
E7EMW7	HGSSRSVVDMDLDDTDDGDDNAPLFYQPGKR	S3(Phospho); S4(Phospho)	S(3): 99.4; S(4): 92.9; S(6): 7.7; T(15): 0.0; Y(26): 0.0	0	4.251e-10
Q8N5P1	TATDSDERIDDEIDTEVEETQEEK	S5(Phospho)	T(1): 0.0; T(3): 0.3; S(5): 99.7; T(15): 0.0; T(20): 0.0	0	4.255e-10
B2RBM8	LMHNASDSEVDQDDVVEWK	S6(Phospho); S8(Phospho)	S(6): 100.0; S(8): 100.0	0	4.266e-10
G5EA03	CSPTVAFVEFPSSPQLK	C1(Carbamidomethyl); S13(Phospho)	S(2): 0.0; T(4): 0.0; S(12): 2.8; S(13): 97.2	0	4.271e-10
Q12888	RSDSPEIPFQAAAGPSDGLDASSPGNSFVGLR	S4(Phospho)	S(2): 0.5; S(4): 99.5; S(16): 0.0; S(22): 0.0; S(23): 0.0; S(27): 0.0	0	4.295e-10
I3L436	VLDTSSLTQSAPASPTNK	S14(Phospho)	T(4): 0.0; S(5): 0.0; S(6): 0.0; T(8): 0.0; S(10): 0.0; S(14): 97.1; T(16): 2.9	0	4.315e-10
F8VWH9	EWSLESSPAQNWTPPQPR	T13(Phospho)	S(3): 0.0; S(6): 0.0; S(7): 0.0; T(13): 100.0	0	4.317e-10
O95685	SLSCLSDLDGGVALEPR	S3(Phospho); C4(Carbamidomethyl)	S(1): 0.0; S(3): 100.0; S(6): 0.0	0	4.325e-10
G3V5V3	NPYLLSEEEDDDVDGDVNVEKNETEPPK	S6(Phospho)	Y(3): 0.0; S(6): 100.0; T(24): 0.0	0	4.328e-10
Q86U70	MSGGSTMSSGGGNTNNSNSK	S2(Phospho)	S(2): 100.0; S(5): 0.0; T(6): 0.0; S(8): 0.0; S(9): 0.0; T(14): 0.0; S(17): 0.0; S(19): 0.0	0	4.344e-10
Q71UH4	YTFDFSEEEDDDADDDDDDNNDLEELK	S6(Phospho)	Y(1): 0.4; T(2): 0.4; S(6): 99.2	0	4.351e-10
Q68DK7	HSPIKEEPCGSLSETVCK	S2(Phospho); C9(Carbamidomethyl); C17(Carbamidomethyl)	S(2): 100.0; S(11): 0.0; S(13): 0.0; T(15): 0.0	0	4.385e-10
Q96T23	GRSTDEYSEADEEEEEEEGKPSR	S3(Phospho); Y7(Phospho)	S(3): 95.7; T(4): 4.3; Y(7): 95.7; S(8): 4.3; S(22): 0.0	0	4.44e-10
Q71UH4	FDSNEEDSASVFSPSFGLK	S3(Phospho)	S(3): 100.0; S(8): 0.0; S(10): 0.0; S(13): 0.0; S(15): 0.0	0	4.488e-10
Q8ND56	KSPTMEQAVQTASAHLPAPAAVGR	S2(Phospho)	S(2): 100.0; T(4): 0.0; T(11): 0.0; S(13): 0.0	0	4.488e-10
K7EKZ3	GNDSDGEGESDDPEK	S4(Phospho)	S(4): 100.0; S(10): 0.0	0	4.494e-10
A8K8Z3	ISDYFEYQGGNGSSPVR	S14(Phospho)	S(2): 0.0; Y(4): 0.0; Y(7): 0.0; S(13): 0.1; S(14): 99.9	0	4.508e-10
Q6P6C2	KSYESSEDCSEAAGSPAR	C9(Carbamidomethyl); S15(Phospho)	S(2): 0.0; Y(3): 0.0; S(5): 0.0; S(6): 0.0; S(10): 0.0; S(15): 100.0	0	4.583e-10
B3KVL0	FIHQQPQSSSPVYGSSAK	S10(Phospho)	S(8): 0.0; S(9): 0.0; S(10): 100.0; Y(13): 0.0; S(15): 0.0; S(16): 0.0	0	4.593e-10
P11388	VPDEEENEESDNEKETEK	S10(Phospho)	S(10): 100.0; T(16): 0.0	0	4.625e-10
P49792	SISSPSVSSETMDKPVDLSTR	S4(Phospho)	S(1): 0.0; S(3): 5.1; S(4): 94.9; S(6): 0.0; S(8): 0.0; S(9): 0.0; T(11): 0.0; S(19): 0.0; T(20): 0.0	0	4.639e-10
B7ZAF7	KKVPYLASSPSTSDGGTDSPGTASPSPTK	S26(Phospho)	Y(5): 0.0; S(8): 0.0; S(9): 0.0; S(11): 0.0; T(12): 0.0; S(13): 0.0; T(17): 0.0; S(19): 0.0; T(22): 0.0; S(24): 0.0; S(26): 94.2; T(28): 5.8	0	4.64e-10
Q0P607	IEIIQPLLDMAAGTSNAAPVAENVTNNEGSPPPPVK	S30(Phospho)	T(14): 0.0; S(15): 0.0; T(25): 0.0; S(30): 100.0	0	4.701e-10
O95817	SQSPAASDCSSSSSSASLPSSGR	S3(Phospho); C9(Carbamidomethyl)	S(1): 3.8; S(3): 96.2; S(7): 0.0; S(10): 0.0; S(11): 0.0; S(12): 0.0; S(13): 0.0; S(14): 0.0; S(15): 0.0; S(17): 0.0; S(20): 0.0; S(21): 0.0	0	4.753e-10
P62070	KFQEQECPPSPEPTR	C7(Carbamidomethyl); S10(Phospho)	S(10): 100.0; T(14): 0.0	0	4.754e-10
P41236	IQEQESSGEEDSDLSPEER	S6(Phospho); S7(Phospho)	S(6): 100.0; S(7): 100.0; S(12): 0.0; S(15): 0.0	0	4.797e-10
Q5QP82	TTSSSDLTTSSSSSGPR	S3(Phospho)	T(1): 0.0; T(2): 0.0; S(3): 100.0; S(4): 0.0; S(5): 0.0; T(8): 0.0; T(9): 0.0; S(10): 0.0; S(11): 0.0; S(12): 0.0; S(13): 0.0; S(14): 0.0	0	4.813e-10
Q09666	ASLGSLEGEAEAEASSPK	S2(Phospho); S5(Phospho)	S(2): 100.0; S(5): 100.0; S(15): 0.0; S(16): 0.0	0	4.852e-10
Q5JSH3	EYVSNDAAQSDDEEK	S10(Phospho)	Y(2): 0.0; S(4): 0.0; S(10): 100.0	0	4.861e-10
B4DYZ7	VALSDDETKETENMR	S4(Phospho)	S(4): 100.0; T(8): 0.0; T(11): 0.0	0	4.917e-10
A0MZ66	VTAEADSSSPTGILATSESK	T11(Phospho)	T(2): 0.0; S(7): 0.0; S(8): 0.0; S(9): 0.2; T(11): 99.8; T(16): 0.0; S(17): 0.0; S(19): 0.0	0	4.974e-10
B4DY08	MESEGGADDSAEEGDLLDDDDNEDRGDDQVK	S3(Phospho); S10(Phospho)	S(3): 100.0; S(10): 100.0	0	4.978e-10
A8K5Q1	RNSCNVGGGGGGFK	S3(Phospho); C4(Carbamidomethyl)	S(3): 100.0	0	5.01e-10
Q08AD1	SISNEGLTLNNSHVSK	S3(Phospho)	S(1): 0.0; S(3): 100.0; T(8): 0.0; S(12): 0.0; S(15): 0.0	0	5.03e-10
P41236	NKTSTTSSMVASAEQPR	S4(Phospho)	T(3): 0.0; S(4): 93.4; T(5): 3.3; T(6): 3.3; S(7): 0.0; S(8): 0.0; S(12): 0.0	0	5.037e-10
Q12888	TSSVLGMSVESAPAVEEEKGEELEQK	S3(Phospho)	T(1): 5.1; S(2): 5.1; S(3): 89.7; S(8): 0.0; S(11): 0.0	0	5.058e-10
P23497	RFSSSDFSDLSNGEELQETCSSSLR	S5(Phospho); C20(Carbamidomethyl)	S(3): 33.3; S(4): 33.3; S(5): 33.3; S(8): 0.1; S(11): 0.0; T(19): 0.0; S(21): 0.0; S(22): 0.0; S(23): 0.0	0	5.109e-10
F1T0L5	RKADGEDAGAESNEEAPGEPSAGSSEEAPGEPSAGSSEEAPGER	S12(Phospho)	S(12): 100.0; S(21): 0.0; S(24): 0.0; S(25): 0.0; S(33): 0.0; S(36): 0.0; S(37): 0.0	0	5.109e-10
Q8NC51	SKSEEAHAEDSVMDHHFR	S3(Phospho)	S(1): 3.3; S(3): 96.7; S(11): 0.0	0	5.116e-10
P24928	YSPTSPTYSPTSPVYTPTSPK	S19(Phospho)	Y(1): 0.0; S(2): 0.0; T(4): 0.0; S(5): 0.0; T(7): 0.0; Y(8): 0.0; S(9): 0.0; T(11): 0.0; S(12): 0.0; Y(15): 1.2; T(16): 32.9; T(18): 32.9; S(19): 32.9	0	5.139e-10
H0Y398	SCGTDSQSENEASPVK	C2(Carbamidomethyl); S13(Phospho)	S(1): 0.0; T(4): 0.0; S(6): 0.0; S(8): 0.0; S(13): 100.0	0	5.165e-10
Q15136	TWTLCGTPEYLAPEIILSK	T3(Phospho); C5(Carbamidomethyl)	T(1): 0.0; T(3): 100.0; T(7): 0.0; Y(10): 0.0; S(18): 0.0	0	5.241e-10
Q3T8J9	VEHSPGPPLADAECQEGLSENSACR	S4(Phospho); C14(Carbamidomethyl); C24(Carbamidomethyl)	S(4): 100.0; S(19): 0.0; S(22): 0.0	0	5.247e-10
E9PFQ4	NFSCGSVEFDEADLESLR	S3(Phospho); C4(Carbamidomethyl)	S(3): 100.0; S(6): 0.0; S(16): 0.0	0	5.297e-10
O95218	EVEDKESEGEEEDEDEDLSKYK	S7(Phospho)	S(7): 100.0; S(19): 0.0; Y(21): 0.0	0	5.357e-10
Q8IXQ3	KIDAGTMAEPSASPSKR	S13(Phospho)	T(6): 0.0; S(11): 0.1; S(13): 99.9; S(15): 0.0	0	5.414e-10
B4DMF7	SQSDLDDQHDYDSVASDEDTDQEPLR	S16(Phospho)	S(1): 0.0; S(3): 0.0; Y(11): 0.0; S(13): 0.0; S(16): 100.0; T(20): 0.0	0	5.442e-10
G3V4C1	MESEGGADDSAEEGDLLDDDDNEDRGDDQLELIKDDEK	S10(Phospho)	S(3): 0.0; S(10): 100.0	0	5.444e-10
Q8WX93	IASDEEIQGTKDAVIQDLER	S3(Phospho)	S(3): 100.0; T(10): 0.0	0	5.447e-10
Q04695	QFTSSSSIKGSSGLGGGSSR	S7(Phospho)	T(3): 0.0; S(4): 0.0; S(5): 0.0; S(6): 0.0; S(7): 100.0; S(11): 0.0; S(12): 0.0; S(18): 0.0; S(19): 0.0	0	5.473e-10
Q15149	GYYSPYSVSGSGSTAGSR	T14(Phospho)	Y(2): 0.0; Y(3): 0.0; S(4): 0.0; Y(6): 0.0; S(7): 0.0; S(9): 0.0; S(11): 0.0; S(13): 0.0; T(14): 0.0; S(17): 100.0	0	5.51e-10
J3KSY7	QSGDGQESTEPVENK	S2(Phospho)	S(2): 100.0; S(8): 0.0; T(9): 0.0	0	5.521e-10
Q5VZL5	RVTQHESDNENEIQIQNK	S7(Phospho)	T(3): 0.0; S(7): 100.0	0	5.558e-10
Q13442	KSLDSDESEDEEDDYQQKR	S5(Phospho)	S(2): 0.0; S(5): 99.9; S(8): 0.1; Y(15): 0.0	0	5.585e-10
Q9BUT9	RAPSTSPSFEGTQETYTVAHEENVR	S6(Phospho); S8(Phospho)	S(4): 98.6; T(5): 91.0; S(6): 1.4; S(8): 8.9; T(12): 0.1; T(15): 0.0; Y(16): 0.0; T(17): 0.0	0	5.618e-10
Q8WWM7	EKEVDGLLTSEPMGSPVSSK	S15(Phospho)	T(9): 0.0; S(10): 0.0; S(15): 100.0; S(18): 0.0; S(19): 0.0	0	5.649e-10
Q5STZ8	KAEQGSEEEGEGEEEEEEGGESK	S6(Phospho)	S(6): 100.0; S(22): 0.0	0	5.669e-10
H0Y6K5	IGPPSPGDDEEEAAAAAGAPAAAGATGDLASAQLGGAPNR	S5(Phospho)	S(5): 100.0; T(26): 0.0; S(31): 0.0	0	5.678e-10
Q63HN8	EDQEAAELLSEPEEESER	S10(Phospho)	S(10): 99.9; S(16): 0.1	0	5.694e-10
Q9H4L7	KLSSSSEPYEEDEFNDDQSIKK	S3(Phospho); S6(Phospho)	S(3): 94.3; S(4): 5.4; S(5): 0.6; S(6): 99.7; Y(9): 0.0; S(19): 0.0	0	5.715e-10
D6R938	ESTESSNTTIEDEDVK	T9(Phospho)	S(2): 0.0; T(3): 0.0; S(5): 0.0; S(6): 0.0; T(8): 0.0; T(9): 100.0	0	5.744e-10
B2R7C5	SEDESETEDEEEKSQEDQEQK	S5(Phospho)	S(1): 0.0; S(5): 100.0; T(7): 0.0; S(14): 0.0	0	5.802e-10
Q92917	LADSGDGAGPSPEEK	S11(Phospho)	S(4): 0.0; S(11): 100.0	0	5.808e-10
O60832	AGLESGAEPGDGDSDTTK	S5(Phospho)	S(5): 100.0; S(14): 0.0; T(16): 0.0; T(17): 0.0	0	5.821e-10
F8VS81	YLLSQSSPAPLTAAEEELR	S7(Phospho)	Y(1): 0.0; S(4): 0.0; S(6): 0.0; S(7): 100.0; T(12): 0.0	0	5.823e-10
Q14694	NHSVNEEEQEEQGEGSEDEWEQVGPR	S16(Phospho)	S(3): 0.0; S(16): 100.0	0	5.874e-10
Q96JM3	KTSPASLDFPESQK	S3(Phospho)	T(2): 0.0; S(3): 100.0; S(6): 0.0; S(12): 0.0	0	5.911e-10
A0A087WV66	IPCKSSPELEDTATSSK	C3(Carbamidomethyl); S6(Phospho)	S(5): 0.0; S(6): 100.0; T(12): 0.0; T(14): 0.0; S(15): 0.0; S(16): 0.0	0	5.921e-10
F8W7U3	TPSDDEEDNLFAPPK	S3(Phospho)	T(1): 0.0; S(3): 100.0	0	5.927e-10
B7Z4Z4	SPSPSSPAAVNHHSSSDISPVSNESTSSSPGK	S29(Phospho)	S(1): 0.0; S(3): 0.0; S(5): 0.0; S(6): 0.0; S(14): 0.0; S(15): 0.0; S(16): 0.0; S(19): 0.0; S(22): 0.0; S(25): 0.0; T(26): 0.0; S(27): 4.8; S(28): 4.8; S(29): 90.5	0	5.939e-10
B4DQZ7	EASSPPPHPQLHSEEEIEPMEGPAPPVLIQLSPPNTDADTR	S32(Phospho)	S(3): 0.0; S(4): 0.0; S(13): 0.0; S(32): 99.9; T(36): 0.1; T(40): 0.0	0	5.95e-10
A0A087WV66	IACKSPPPESVDTPTSTK	C3(Carbamidomethyl); S5(Phospho)	S(5): 100.0; S(10): 0.0; T(13): 0.0; T(15): 0.0; S(16): 0.0; T(17): 0.0	0	5.96e-10
B4DN81	HDSIPAADTFEDLSDVEGGGSEPTQR	S14(Phospho)	S(3): 0.0; T(9): 0.0; S(14): 100.0; S(21): 0.0; T(24): 0.0	0	5.979e-10
Q13610	LQEEGGGSDEEETGSPSEDGMQSAR	S8(Phospho)	S(8): 100.0; T(13): 0.0; S(15): 0.0; S(17): 0.0; S(23): 0.0	0	6.024e-10
Q02078	GCDSPDPDTSYVLTPHTEEK	C2(Carbamidomethyl); S4(Phospho); T14(Phospho)	S(4): 100.0; T(9): 0.0; S(10): 0.0; Y(11): 0.0; T(14): 100.0; T(17): 0.0	0	6.079e-10
Q12906	GEDSAEETEAKPAVVAPAPVVEAVSTPSAAFPSDATAEQGPILTK	S4(Phospho)	S(4): 99.9; T(8): 0.1; S(25): 0.0; T(26): 0.0; S(28): 0.0; S(33): 0.0; T(36): 0.0; T(44): 0.0	0	6.141e-10
Q9Y570	DFSPVPWSQYFESMEDVEVENETGKDTFR	S3(Phospho)	S(3): 100.0; S(8): 0.0; Y(10): 0.0; S(13): 0.0; T(23): 0.0; T(27): 0.0	0	6.154e-10
Q9BTU6	VAAAAGSGPSPPGSPGHDR	S10(Phospho)	S(7): 0.0; S(10): 100.0; S(14): 0.0	0	6.163e-10
Q04656	SSEGSQQRSPSYTNDSTATFIIDGMHCK	S2(Phospho); C27(Carbamidomethyl)	S(1): 49.7; S(2): 49.7; S(5): 0.3; S(9): 0.3; S(11): 0.0; Y(12): 0.0; T(13): 0.0; S(16): 0.0; T(17): 0.0; T(19): 0.0	0	6.271e-10
P13645	HYSSSRSGGGGGGGGCGGGGGVSSLR	S5(Phospho); S7(Phospho); C16(Carbamidomethyl)	Y(2): 0.0; S(3): 0.1; S(4): 0.9; S(5): 99.0; S(7): 100.0; S(23): 0.0; S(24): 0.0	0	6.274e-10
Q9H1E3	EKTPSPKEEDEEPESPPEK	S15(Phospho)	T(3): 0.0; S(5): 0.0; S(15): 100.0	0	6.343e-10
Q14814	ERSPAPPPPAVFPAARPEPGDGLSSPAGGSYETGDR	S3(Phospho)	S(3): 100.0; S(24): 0.0; S(25): 0.0; S(30): 0.0; Y(31): 0.0; T(33): 0.0	0	6.349e-10
B3KSZ4	LQQQAALSPTTAPAVSSVSK	S8(Phospho)	S(8): 100.0; T(10): 0.0; T(11): 0.0; S(16): 0.0; S(17): 0.0; S(19): 0.0	0	6.352e-10
J3KP58	TASESISNLSEAGSIK	S14(Phospho)	T(1): 0.0; S(3): 0.0; S(5): 0.0; S(7): 0.0; S(10): 0.0; S(14): 100.0	0	6.369e-10
B3KP82	RDSDGVDGFEAEGK	S3(Phospho)	S(3): 100.0	0	6.396e-10
P30086	NRPTSISWDGLDSGK	S5(Phospho)	T(4): 0.1; S(5): 99.9; S(7): 0.0; S(13): 0.0	0	6.417e-10
Q96B36	SSDEENGPPSSPDLDR	S11(Phospho)	S(1): 0.0; S(2): 0.0; S(10): 0.1; S(11): 99.9	0	6.421e-10
Q8NEJ9	FKPHPSNMMSKLSSEDEEEDEAEDDQSEASGKK	S13(Phospho); S14(Phospho)	S(6): 22.7; S(10): 9.1; S(13): 84.1; S(14): 84.1; S(27): 0.0; S(30): 0.0	0	6.447e-10
Q9UKL0	RSQERDNLGMLVWSPNQNLSEAK	S2(Phospho)	S(2): 100.0; S(14): 0.0; S(20): 0.0	0	6.467e-10
B2RBA0	DHNSEDEDEDKYADDIDMPGQNFDSK	S4(Phospho)	S(4): 100.0; Y(12): 0.0; S(25): 0.0	0	6.5e-10
B2RBJ7	CQSVSSAGELETENYER	C1(Carbamidomethyl); S6(Phospho)	S(3): 0.0; S(5): 0.0; S(6): 100.0; T(12): 0.0; Y(15): 0.0	0	6.559e-10
P31350	VPLAPITDPQQLQLSPLK	S15(Phospho)	T(7): 0.0; S(15): 100.0	0	6.567e-10
B2RA03	STSFRGGMGSGGLATGIAGGLAGMGGIQNEKETMQSLNDR	T2(Phospho)	S(1): 0.7; T(2): 91.5; S(3): 7.8; S(10): 0.0; T(15): 0.0; T(33): 0.0; S(36): 0.0	0	6.575e-10
Q5T8I3	ILQSQDFSLDSSAEEEGLR	S11(Phospho)	S(4): 0.0; S(8): 0.0; S(11): 96.5; S(12): 3.4	0	6.65e-10
Q9BTC0	RNSVERPAEPVAGAATPSLVEQQK	S3(Phospho)	S(3): 100.0; T(16): 0.0; S(18): 0.0	0	6.732e-10
I3L280	KNSTGSGHSAQELPTIR	S3(Phospho)	S(3): 100.0; T(4): 0.0; S(6): 0.0; S(9): 0.0; T(15): 0.0	0	6.74e-10
Q9UHR4	TPASTPVSGTPQASPMIER	S14(Phospho)	T(1): 0.0; S(4): 0.0; T(5): 0.0; S(8): 0.0; T(10): 0.0; S(14): 100.0	0	6.748e-10
E9PM92	SASPDDDLGSSNWEAADLGNEERK	S3(Phospho)	S(1): 5.0; S(3): 95.0; S(10): 0.0; S(11): 0.0	0	6.758e-10
E7ESM9	EGITGPPADSSKPIGPDDAIDALSSDFTCGSPTAAGK	C29(Carbamidomethyl); S31(Phospho)	T(4): 0.0; S(10): 0.0; S(11): 0.0; S(24): 0.0; S(25): 0.0; T(28): 0.0; S(31): 50.0; T(33): 50.0	0	6.769e-10
A0A024R7N3	AVQQHQHGYDSDEEVDSELGTWEHQLR	S11(Phospho)	Y(9): 4.7; S(11): 95.3; S(17): 0.0; T(21): 0.0	0	6.83e-10
H7C4T3	DSSGSVSPNTLSQEEGDQICLYHIR	S3(Phospho); C20(Carbamidomethyl)	S(2): 0.0; S(3): 6.1; S(5): 0.0; S(7): 93.8; T(10): 0.0; S(12): 0.0; Y(22): 0.0	0	6.837e-10
H0YKH0	KDAPTSPASVASSSSTPSSK	S6(Phospho)	T(5): 0.0; S(6): 100.0; S(9): 0.0; S(12): 0.0; S(13): 0.0; S(14): 0.0; S(15): 0.0; T(16): 0.0; S(18): 0.0; S(19): 0.0	0	6.959e-10
B7Z8Z8	SESTDSLGGLSPSEVTAIQCK	T4(Phospho); S6(Phospho); C20(Carbamidomethyl)	S(1): 49.9; S(3): 49.9; T(4): 0.1; S(6): 100.0; S(11): 0.0; S(13): 0.0; T(16): 0.0	0	6.971e-10
P18583	DTEEPLPVKESDQTLAALLSPK	S20(Phospho)	T(2): 0.0; S(11): 0.0; T(14): 0.0; S(20): 100.0	0	7.024e-10
B4E0I5	NHAGSPGCEESDAGKEK	S5(Phospho); C8(Carbamidomethyl)	S(5): 100.0; S(11): 0.0	0	7.135e-10
E9PMS6	LPSPTSPFSSLSQDQAATSK	S3(Phospho); T5(Phospho)	S(3): 100.0; T(5): 0.0; S(6): 100.0; S(9): 0.0; S(10): 0.0; S(12): 0.0; T(18): 0.0; S(19): 0.0	0	7.145e-10
E9PF63	SQLQALHIGLDSSSIGSGPGDAEADDGFPESR	S14(Phospho); S17(Phospho)	S(1): 0.0; S(12): 0.7; S(13): 7.9; S(14): 91.4; S(17): 100.0; S(31): 0.0	0	7.204e-10
H0Y4B4	GSESPEMGPEVTPAPR	S4(Phospho)	S(2): 0.0; S(4): 100.0; T(12): 0.0	0	7.206e-10
Q96JM3	DNQESSDAELSSSEYIK	S6(Phospho)	S(5): 0.1; S(6): 99.9; S(11): 0.0; S(12): 0.0; S(13): 0.0; Y(15): 0.0	0	7.222e-10
Q9H2Y7	LSFASETPLEKEPHSPADQPEQQAESTLTSAETR	S15(Phospho)	S(2): 0.8; S(5): 0.8; T(7): 8.2; S(15): 90.2; S(26): 0.0; T(27): 0.0; T(29): 0.0; S(30): 0.0; T(33): 0.0	0	7.228e-10
Q5JSZ5	EGPGSEPDSQVDGGLSGASLGEK	S5(Phospho)	S(5): 100.0; S(9): 0.0; S(16): 0.0; S(19): 0.0	0	7.271e-10
B4DQF1	VGDSTPVSEKPVSAAVDANASESP	S23(Phospho)	S(4): 0.0; T(5): 0.0; S(8): 0.0; S(13): 0.0; S(21): 0.0; S(23): 100.0	0	7.304e-10
Q14247	GPVSGTEPEPVYSMEAADYR	S13(Phospho)	S(4): 0.0; T(6): 0.0; Y(12): 0.1; S(13): 99.9; Y(19): 0.0	0	7.327e-10
Q9H3Z4	SLSTSGESLYHVLGLDK	S3(Phospho)	S(1): 0.0; S(3): 100.0; T(4): 0.0; S(5): 0.0; S(8): 0.0; Y(10): 0.0	0	7.335e-10
B0AZQ4	KGDVEGSQSQDEGEGSGESER	S9(Phospho)	S(7): 0.0; S(9): 100.0; S(16): 0.0; S(19): 0.0	0	7.365e-10
B3KS28	CPFPAGAALACCSEDEEDDEEHEGGGSR	C1(Carbamidomethyl); C11(Carbamidomethyl); C12(Carbamidomethyl); S13(Phospho)	S(13): 100.0; S(27): 0.0	0	7.368e-10
Q9NY27	NHSDSSTSESEVSSVSPLKNK	S16(Phospho)	S(3): 0.0; S(5): 0.0; S(6): 0.0; T(7): 0.0; S(8): 0.0; S(10): 0.0; S(13): 0.0; S(14): 0.0; S(16): 100.0	0	7.369e-10
Q07021	ALVLDCHYPEDEVGQEDEAESDIFSIR	C6(Carbamidomethyl); S21(Phospho)	Y(8): 0.0; S(21): 100.0; S(25): 0.0	0	7.438e-10
Q86UU0	GPGDLMGPQGLSPEEMAR	S12(Phospho)	S(12): 100.0	0	7.439e-10
Q14247	LPSSPVYEDAASFK	S4(Phospho)	S(3): 0.0; S(4): 100.0; Y(7): 0.0; S(12): 0.0	0	7.446e-10
P55081	EDSSEEEEEEIDDEEIER	S3(Phospho); S4(Phospho)	S(3): 100.0; S(4): 100.0	0	7.465e-10
B3KR38	WSPAYSFSSDSPLDSSPK	S6(Phospho)	S(2): 0.0; Y(5): 0.0; S(6): 96.7; S(8): 3.2; S(9): 0.1; S(11): 0.0; S(15): 0.0; S(16): 0.0	0	7.498e-10
O43719	EFDEDSDEKEEEEDTYEK	S6(Phospho)	S(6): 100.0; T(15): 0.0; Y(16): 0.0	0	7.536e-10
O94874	GRKDDDSDDESQSSHTGK	S7(Phospho)	S(7): 100.0; S(11): 0.0; S(13): 0.0; S(14): 0.0; T(16): 0.0	0	7.591e-10
Q86VQ1	TSSLDTITGPYLTGQWPR	S3(Phospho)	T(1): 33.3; S(2): 33.3; S(3): 33.3; T(6): 0.0; T(8): 0.0; Y(11): 0.0; T(13): 0.0	0	7.656e-10
G3V5V3	KLPSDSGDLEALEGK	S4(Phospho)	S(4): 100.0; S(6): 0.0	0	7.663e-10
P35579	GAGDGSDEEVDGKADGAEAKPAE	S6(Phospho)	S(6): 100.0	0	7.795e-10
Q96EV2	DIKEESDEEEEDDEESGR	S6(Phospho)	S(6): 100.0; S(16): 0.0	0	7.84e-10
O14646	SSVSDAPVHITASGEPVPISEESEELDQK	S4(Phospho)	S(1): 33.3; S(2): 33.3; S(4): 33.3; T(11): 0.0; S(13): 0.0; S(20): 0.0; S(23): 0.0	0	7.862e-10
P07355	LSLEGDHSTPPSAYGSVK	S16(Phospho)	S(2): 0.0; S(8): 0.0; T(9): 0.0; S(12): 0.0; Y(14): 0.0; S(16): 100.0	0	7.921e-10
Q12873	ELQGDGPPSSPTNDPTVK	S10(Phospho)	S(9): 1.8; S(10): 49.1; T(12): 49.1; T(16): 0.0	0	7.995e-10
Q6AI22	AEENTDQASPQEDYAGFER	S9(Phospho)	T(5): 0.0; S(9): 100.0; Y(14): 0.0	0	8.019e-10
A0A075B6E4	KFSMEPGDEDLDCDNDHVSK	S3(Phospho); C13(Carbamidomethyl)	S(3): 100.0; S(19): 0.0	0	8.071e-10
Q96HR8	NDQEPPPEALDFSDDEKEK	S13(Phospho)	S(13): 100.0	0	8.13e-10
P08238	IEDVGSDEEDDSGKDKK	S6(Phospho)	S(6): 100.0; S(12): 0.0	0	8.22e-10
Q4LE79	SSSFSDTLEESSPIAAIFDTENLEK	S2(Phospho); S3(Phospho)	S(1): 51.7; S(2): 51.7; S(3): 96.6; S(5): 0.0; T(7): 0.0; S(11): 0.0; S(12): 0.0; T(20): 0.0	0	8.232e-10
A0A024RCR6	APPQTHLPSGASSGTGSASATHGGGSPPGTR	S26(Phospho)	T(5): 0.0; S(9): 0.0; S(12): 0.0; S(13): 0.0; T(15): 0.0; S(17): 0.0; S(19): 0.0; T(21): 0.0; S(26): 100.0; T(30): 0.0	0	8.277e-10
Q5STZ8	AEQGSEEEGEGEEEEEEGGESKADDPYAHLSK	S5(Phospho)	S(5): 100.0; S(21): 0.0; Y(27): 0.0; S(31): 0.0	0	8.311e-10
Q14978	KKASSSDSEDSSEEEEEVQGPPAK	S4(Phospho)	S(4): 99.2; S(5): 0.3; S(6): 0.3; S(8): 0.3; S(11): 0.0; S(12): 0.0	0	8.366e-10
C9JKA9	QLEHVMDSAAEDPQSPK	S15(Phospho)	S(8): 0.0; S(15): 100.0	0	8.445e-10
Q6WCQ1	TKDQPDGSSLSPAQSPSQSQPPAASSLR	S11(Phospho); S15(Phospho)	T(1): 0.0; S(8): 0.0; S(9): 0.4; S(11): 99.6; S(15): 100.0; S(17): 0.0; S(19): 0.0; S(25): 0.0; S(26): 0.0	0	8.447e-10
Q8IVT2	RALSSDSILSPAPDAR	S4(Phospho)	S(4): 99.9; S(5): 0.1; S(7): 0.0; S(10): 0.0	0	8.493e-10
Q04695	QFTSSSSIKGSSGLGGGSSR	S6(Phospho); S7(Phospho)	T(3): 0.0; S(4): 0.0; S(5): 0.0; S(6): 100.0; S(7): 89.3; S(11): 5.3; S(12): 5.3; S(18): 0.0; S(19): 0.0	0	8.501e-10
Q9H8G2	STDSSSVSGSLQQETK	S1(Phospho)	S(1): 95.6; T(2): 4.4; S(4): 0.0; S(5): 0.0; S(6): 0.0; S(8): 0.0; S(10): 0.0; T(15): 0.0	0	8.531e-10
H0YK04	GGIDNPAITSDQELDDKK	S10(Phospho)	T(9): 0.0; S(10): 100.0	0	8.613e-10
A0A024R095	ESSTESSQSAKPVSGQDTSGNTEGSPAAEK	S25(Phospho)	S(2): 0.0; S(3): 0.0; T(4): 0.0; S(6): 0.0; S(7): 0.0; S(9): 0.0; S(14): 0.0; T(18): 0.0; S(19): 0.0; T(22): 0.0; S(25): 100.0	0	8.621e-10
B5BU38	GGPGSAVSPYPTFNPSSDVAALHK	S8(Phospho)	S(5): 0.2; S(8): 99.7; Y(10): 0.2; T(12): 0.0; S(16): 0.0; S(17): 0.0	0	8.632e-10
B7Z7U0	VPKPEPIPEPKEPSPEK	S14(Phospho)	S(14): 100.0	0	8.635e-10
B4DEY3	GDAASSPAPAASVGSSQGGAR	S6(Phospho)	S(5): 3.8; S(6): 96.2; S(12): 0.0; S(15): 0.0; S(16): 0.0	0	8.71e-10
J3KMX2	AEGDSAGTAGTPGGTPAGDK	T11(Phospho)	S(5): 0.0; T(8): 0.1; T(11): 99.9; T(15): 0.0	0	8.711e-10
Q9BVJ6	SELSQDAEPAGSQETK	S4(Phospho)	S(1): 0.0; S(4): 100.0; S(12): 0.0; T(15): 0.0	0	8.718e-10
B4DFV1	SDSASSEPVGIYQGFEK	S3(Phospho)	S(1): 0.0; S(3): 100.0; S(5): 0.0; S(6): 0.0; Y(12): 0.0	0	8.728e-10
Q9Y3T9	DLFDLNSSEEDDTEGFSER	S7(Phospho); S8(Phospho)	S(7): 100.0; S(8): 100.0; T(13): 0.0; S(17): 0.0	0	8.779e-10
Q8N5P1	SKDYDVYSDNDICSQESEDNFAK	S8(Phospho); C13(Carbamidomethyl)	S(1): 0.0; Y(4): 0.0; Y(7): 4.6; S(8): 95.4; S(14): 0.0; S(17): 0.0	0	8.784e-10
A8K0J3	NGPLNESQEDEEDSEHGTSLNR	S7(Phospho)	S(7): 100.0; S(14): 0.0; T(18): 0.0; S(19): 0.0	0	8.821e-10
P13645	GSLGGGFSSGGFSGGSFSR	S2(Phospho); S16(Phospho)	S(2): 100.0; S(8): 0.0; S(9): 0.0; S(13): 0.0; S(16): 99.8; S(18): 0.2	0	8.83e-10
O00629	NVPHEDICEDSDIDGDYR	C8(Carbamidomethyl); S11(Phospho)	S(11): 100.0; Y(17): 0.0	0	8.831e-10
Q00610	TSIDAYDNFDNISLAQR	S13(Phospho)	T(1): 0.0; S(2): 0.0; Y(6): 0.0; S(13): 100.0	0	8.884e-10
P25490	DIDHETVVEEQIIGENSPPDYSEYMTGK	S17(Phospho)	T(6): 0.0; S(17): 100.0; Y(21): 0.0; S(22): 0.0; Y(24): 0.0; T(26): 0.0	0	8.923e-10
Q9UG54	RRSIQDLTVTGTEPGQVSSR	S3(Phospho)	S(3): 100.0; T(8): 0.0; T(10): 0.0; T(12): 0.0; S(18): 0.0; S(19): 0.0	0	8.972e-10
J3QLL0	NVSSFPDDATSPLQENR	S11(Phospho)	S(3): 0.0; S(4): 0.0; T(10): 0.1; S(11): 99.9	0	9.062e-10
E7ESM9	DTSQSDKDLDDALDKLSDSLGQR	S17(Phospho)	T(2): 0.0; S(3): 0.0; S(5): 0.0; S(17): 99.9; S(19): 0.1	0	9.11e-10
Q8NAN9	GLYDGPVCEVSVTPK	C8(Carbamidomethyl); T13(Phospho)	Y(3): 0.0; S(11): 0.0; T(13): 100.0	0	9.161e-10
Q9H1E3	VVDYSQFQESDDADEDYGR	S10(Phospho)	Y(4): 0.0; S(5): 0.0; S(10): 100.0; Y(17): 0.0	0	9.295e-10
Q9UQ35	FQSDSSSYPTVDSNSLLGQSR	S15(Phospho)	S(3): 0.0; S(5): 0.0; S(6): 0.0; S(7): 0.0; Y(8): 0.0; T(10): 0.0; S(13): 3.6; S(15): 96.4; S(20): 0.0	0	9.359e-10
A9UEZ6	HQDGLPYIDDSPSSSPHLSSK	S11(Phospho)	Y(7): 0.0; S(11): 100.0; S(13): 0.0; S(14): 0.0; S(15): 0.0; S(19): 0.0; S(20): 0.0	0	9.392e-10
A0A087WWP4	SRSPLDKDTYPPSASVVGASVGGHR	S1(Phospho); S3(Phospho)	S(1): 100.0; S(3): 100.0; T(9): 0.0; Y(10): 0.0; S(13): 0.0; S(15): 0.0; S(20): 0.0	0	9.414e-10
Q9H814	SLNFQEDDDTSRETFASDTNEALASLDESQEGHAEAK	S11(Phospho)	S(1): 0.0; T(10): 8.5; S(11): 81.1; T(14): 8.5; S(17): 0.9; T(19): 0.9; S(25): 0.0; S(29): 0.0	0	9.436e-10
Q9BR23	SSPGQTPEEGAQALAEFAALHGPALR	S2(Phospho)	S(1): 50.0; S(2): 50.0; T(6): 0.0	0	9.441e-10
B4DZX7	KVEEEQEADEEDVSEEEAESKEGTNK	S14(Phospho)	S(14): 100.0; S(20): 0.0; T(24): 0.0	0	9.468e-10
B4DN59	TNPEDIYPSNPTDDDVSSGSSSER	S21(Phospho)	T(1): 0.0; Y(7): 0.0; S(9): 0.0; T(12): 0.0; S(17): 0.1; S(18): 2.2; S(20): 47.7; S(21): 47.7; S(22): 2.2	0	9.545e-10
A0A024R4E5	VATLNSEEESDPPTYK	S6(Phospho)	T(3): 0.0; S(6): 100.0; S(10): 0.0; T(14): 0.0; Y(15): 0.0	0	9.592e-10
O43248	NSYSSCYAAADELMHR	S2(Phospho); C6(Carbamidomethyl)	S(2): 99.9; Y(3): 0.1; S(4): 0.0; S(5): 0.0; Y(7): 0.0	0	9.643e-10
Q15751	RVSTDLPEGQDVYTAACNSVIHR	S3(Phospho); C17(Carbamidomethyl)	S(3): 96.5; T(4): 3.5; Y(13): 0.0; T(14): 0.0; S(19): 0.0	0	9.699e-10
A0A024RA66	QTDPSTPQQESSKPLGGIQPSSQTIQPK	S5(Phospho)	T(2): 86.5; S(5): 6.8; T(6): 6.8; S(11): 0.0; S(12): 0.0; S(21): 0.0; S(22): 0.0; T(24): 0.0	0	9.734e-10
Q7L014	AALGLQDSDDEDAAVDIDEQIESMFNSK	S8(Phospho)	S(8): 100.0; S(23): 0.0; S(27): 0.0	0	9.783e-10
Q9BZQ8	RASAILPGVLGSETLSNEVFQESEEEKQPEVPSSLAK	S3(Phospho)	S(3): 100.0; S(12): 0.0; T(14): 0.0; S(16): 0.0; S(23): 0.0; S(33): 0.0; S(34): 0.0	0	9.821e-10
B3KNT3	APRSPPVGSGPASGVEPTSFPVESEAR	S4(Phospho)	S(4): 100.0; S(9): 0.0; S(13): 0.0; T(18): 0.0; S(19): 0.0; S(24): 0.0	0	9.856e-10
B3KNP0	IDENSDKEMEVEESPEK	S5(Phospho)	S(5): 100.0; S(14): 0.0	0	9.933e-10
Q27J81	GARPPAAGPGGDEDEDEEDTAPESALDTSLDK	T20(Phospho)	T(20): 100.0; S(24): 0.0; T(28): 0.0; S(29): 0.0	0	9.987e-10
Q9H6L6	AAPEASSPPASPLQHLLPGK	S7(Phospho)	S(6): 0.0; S(7): 99.8; S(11): 0.2	0	1.01e-09
D3DVC4	DGESDGFADEEESGEEGEEDQEEGREPGAGR	S13(Phospho)	S(4): 0.0; S(13): 100.0	0	1.016e-09
Q15527	KDLGSTEDGDGTDDFLTDKEDEK	T17(Phospho)	S(5): 0.0; T(6): 0.0; T(12): 0.0; T(17): 100.0	0	1.018e-09
B4DQT0	ENENSSPVAGAFGVFSTISTAVQSTGK	S6(Phospho)	S(5): 50.0; S(6): 50.0; S(16): 0.0; T(17): 0.0; S(19): 0.0; T(20): 0.0; S(24): 0.0; T(25): 0.0	0	1.029e-09
A8K4U4	AASPPASASDLIEQQQK	S3(Phospho)	S(3): 100.0; S(7): 0.0; S(9): 0.0	0	1.034e-09
Q96FS1	HYEDGYPGGSDNYGSLSR	S15(Phospho)	Y(2): 0.0; Y(6): 0.0; S(10): 0.0; Y(13): 0.0; S(15): 100.0; S(17): 0.0	0	1.034e-09
B0QY16	VSTGDTSPCGTEEDSSPASPMHER	S7(Phospho); C9(Carbamidomethyl)	S(2): 2.8; T(3): 48.5; T(6): 0.2; S(7): 48.5; T(11): 0.0; S(15): 0.0; S(16): 0.0; S(19): 0.0	0	1.034e-09
Q9UQ35	AGMSSNQSISSPVLDAVPR	S8(Phospho); S11(Phospho)	S(4): 0.0; S(5): 0.0; S(8): 100.0; S(10): 4.7; S(11): 95.3	0	1.036e-09
Q09666	ISMSEVDLNVAAPK	S2(Phospho)	S(2): 100.0; S(4): 0.0	0	1.038e-09
E9PFQ8	VVPGQFDDADSSDSENR	S12(Phospho)	S(11): 50.0; S(12): 50.0; S(14): 0.1	0	1.048e-09
E9PFZ0	VAESAQSPAAAHTTDTAGYNAMEESVSR	S7(Phospho)	S(4): 0.5; S(7): 99.5; T(13): 0.0; T(14): 0.0; T(16): 0.0; Y(19): 0.0; S(25): 0.0; S(27): 0.0	0	1.049e-09
A1L3A9	ASVVDPSTESSPAPQEGSEQPASPASPLSSR	S26(Phospho)	S(2): 0.0; S(7): 0.0; T(8): 0.0; S(10): 0.0; S(11): 0.0; S(18): 0.0; S(23): 0.0; S(26): 99.6; S(29): 0.4; S(30): 0.0	0	1.055e-09
B4DER6	SQSGEDESMNQPGPIK	S3(Phospho)	S(1): 0.0; S(3): 100.0; S(8): 0.0	0	1.061e-09
Q9UPU5	IILNSHSPAGSAAISQQDFHPK	S5(Phospho)	S(5): 50.0; S(7): 50.0; S(11): 0.0; S(15): 0.0	0	1.065e-09
Q8TAQ2	DMDEPSPVPNVEEVTLPK	S6(Phospho)	S(6): 100.0; T(15): 0.0	0	1.069e-09
B7Z6N1	TPADTGFAFPDWAYKPESSPGSR	S19(Phospho)	T(1): 0.0; T(5): 0.0; Y(14): 0.0; S(18): 0.2; S(19): 95.4; S(22): 4.4	0	1.069e-09
Q2M389	EKEEETKTSNGDLSDSTVSADPVVK	T6(Phospho)	T(6): 94.8; T(8): 4.9; S(9): 0.3; S(14): 0.0; S(16): 0.0; T(17): 0.0; S(19): 0.0	0	1.07e-09
B4DWB1	GAVENEEDLPELSDSGDEAAWEDEDDADLPHGK	S13(Phospho); S15(Phospho)	S(13): 100.0; S(15): 100.0	0	1.075e-09
P17096	KLEKEEEEGISQESSEEEQ	S15(Phospho)	S(11): 0.0; S(14): 0.1; S(15): 99.9	0	1.076e-09
Q08945	EGMNPSYDEYADSDEDQHDAYLER	S13(Phospho)	S(6): 0.0; Y(7): 0.0; Y(10): 0.0; S(13): 100.0; Y(21): 0.0	0	1.087e-09
B3KN30	QHSNPGHAGPFPVVSVHNTTINPTSPTTATMANANR	S3(Phospho)	S(3): 100.0; S(15): 0.0; T(19): 0.0; T(20): 0.0; T(24): 0.0; S(25): 0.0; T(27): 0.0; T(28): 0.0; T(30): 0.0	0	1.089e-09
Q9Y3P9	EVLDEDTDEEKETLK	T7(Phospho)	T(7): 100.0; T(13): 0.0	0	1.099e-09
Q9Y4B5	REGPVGGESDSEEMFEK	S9(Phospho)	S(9): 100.0; S(11): 0.0	0	1.101e-09
G3V4C1	MESEGGADDSAEEGDLLDDDDNEDR	S10(Phospho)	S(3): 0.0; S(10): 100.0	0	1.102e-09
H0Y6J6	RPDPDSDEDEDYER	S6(Phospho)	S(6): 100.0; Y(12): 0.0	0	1.105e-09
B2R8R5	LASPSGSTSSGLEVVAPEGTSAPGGGPGTLDDSATICR	S5(Phospho); C37(Carbamidomethyl)	S(3): 45.9; S(5): 45.9; S(7): 0.3; T(8): 0.3; S(9): 3.8; S(10): 3.8; T(20): 0.0; S(21): 0.0; T(29): 0.0; S(33): 0.0; T(35): 0.0	0	1.112e-09
E9PFP1	APPPPSSPPPGGAPDGSEPSPDFPALLVEK	S7(Phospho)	S(6): 6.2; S(7): 93.8; S(17): 0.0; S(20): 0.0	0	1.113e-09
O15047	SGSPAPETTNESVPFAQHSSLDSR	S1(Phospho); S3(Phospho)	S(1): 100.0; S(3): 100.0; T(8): 0.0; T(9): 0.0; S(12): 0.0; S(19): 0.0; S(20): 0.0; S(23): 0.0	0	1.118e-09
Q13442	SLDSDESEDEEDDYQQK	S4(Phospho); S7(Phospho)	S(1): 0.0; S(4): 100.0; S(7): 100.0; Y(14): 0.0	0	1.122e-09
B2RA03	GGMGSGGLATGIAGGLAGMGGIQNEK	S5(Phospho)	S(5): 100.0; T(10): 0.0	0	1.132e-09
Q12872	KSGVSSDNEDDDDEEDGNYLHPSLFASK	S5(Phospho)	S(2): 0.3; S(5): 94.2; S(6): 5.5; Y(19): 0.0; S(23): 0.0; S(27): 0.0	0	1.135e-09
Q9GZP8	QGHHSSSDSSSSSSDSDTDVK	S16(Phospho)	S(5): 0.0; S(6): 0.0; S(7): 0.0; S(9): 0.0; S(10): 0.0; S(11): 0.0; S(12): 0.0; S(13): 0.0; S(14): 0.0; S(16): 95.5; T(18): 4.5	0	1.137e-09
B7Z5N7	VNLEESSGVENSPAGARPK	S12(Phospho)	S(6): 0.0; S(7): 0.0; S(12): 100.0	0	1.156e-09
P04049	AAHTEDINACTLTTSPR	C10(Carbamidomethyl); S15(Phospho)	T(4): 0.0; T(11): 0.0; T(13): 0.0; T(14): 0.1; S(15): 99.9	0	1.162e-09
Q96ST2	TIASDSEEEAGKELSDK	S4(Phospho); S6(Phospho)	T(1): 0.0; S(4): 100.0; S(6): 100.0; S(15): 0.0	0	1.167e-09
Q96FS1	LRSYEDMIGEEVPSDQYYWAPLAQHER	S3(Phospho)	S(3): 4.6; Y(4): 95.4; S(14): 0.0; Y(17): 0.0; Y(18): 0.0	0	1.168e-09
I3L280	SISCEEATCSDTSESILEEEPQENQKK	S3(Phospho); C4(Carbamidomethyl); C9(Carbamidomethyl)	S(1): 0.3; S(3): 99.7; T(8): 0.0; S(10): 0.0; T(12): 0.0; S(13): 0.0; S(15): 0.0	0	1.174e-09
P13645	GSSGGGCFGGSSGGYGGLGGFGGGSFR	S2(Phospho); C7(Carbamidomethyl)	S(2): 94.9; S(3): 5.1; S(11): 0.0; S(12): 0.0; Y(15): 0.0; S(25): 0.0	0	1.178e-09
C9J8L0	ASLVSEEEEDEEEDKATPR	S5(Phospho)	S(2): 0.0; S(5): 100.0; T(17): 0.0	0	1.188e-09
P35606	STAQQELDGKPASPTPVIVASHTANKEEK	S13(Phospho)	S(1): 0.0; T(2): 0.0; S(13): 100.0; T(15): 0.0; S(21): 0.0; T(23): 0.0	0	1.2e-09
Q5STZ8	LSVPTSDEEDEVPAPKPR	S6(Phospho)	S(2): 0.0; T(5): 0.0; S(6): 100.0	0	1.203e-09
B4DMI9	SSIEDAQCPGLPDLIEENHVVNK	S2(Phospho); C8(Carbamidomethyl)	S(1): 50.0; S(2): 50.0	0	1.214e-09
K7EM16	MKSSSSVTTSETQPCTPSSSDYSDLQR	S4(Phospho); C15(Carbamidomethyl)	S(3): 48.8; S(4): 48.8; S(5): 2.3; S(6): 0.1; T(8): 0.0; T(9): 0.0; S(10): 0.0; T(12): 0.0; T(16): 0.0; S(18): 0.0; S(19): 0.0; S(20): 0.0; Y(22): 0.0; S(23): 0.0	0	1.215e-09
Q5UIP0	RRSEVVESTTESQDK	S3(Phospho)	S(3): 100.0; S(8): 0.0; T(9): 0.0; T(10): 0.0; S(12): 0.0	0	1.216e-09
O95365	VRGGAPDPSPGATATPGAPAQPSSPDAR	S24(Phospho)	S(9): 0.0; T(13): 0.0; T(15): 0.0; S(23): 50.0; S(24): 50.0	0	1.217e-09
Q56NI9	VLSEPIGPESPSSTECPR	S10(Phospho); C16(Carbamidomethyl)	S(3): 0.0; S(10): 100.0; S(12): 0.0; S(13): 0.0; T(14): 0.0	0	1.228e-09
M0R3C8	TPESQPDTPPGTPLVSQDEKR	T8(Phospho)	T(1): 0.0; S(4): 0.0; T(8): 100.0; T(12): 0.0; S(16): 0.0	0	1.238e-09
B7Z854	SLSEINKPNFYNNDFDDDFSHR	S3(Phospho)	S(1): 0.0; S(3): 100.0; Y(11): 0.0; S(20): 0.0	0	1.249e-09
O95218	EVEDKESEGEEEDEDEDLSK	S7(Phospho)	S(7): 100.0; S(19): 0.0	0	1.277e-09
P16989	SVGDGETVEFDVVEGEK	S1(Phospho)	S(1): 100.0; T(7): 0.0	0	1.282e-09
O00267	SAAGSEKEEEPEDEEEEEEEEEYDEEEEEEDDDRPPKKPR	S5(Phospho)	S(1): 0.1; S(5): 99.9; Y(23): 0.0	0	1.287e-09
B3KR49	IADPEHDHTGFLTEYVATR	T13(Phospho); Y15(Phospho)	T(9): 0.0; T(13): 100.0; Y(15): 99.8; T(18): 0.2	0	1.298e-09
Q9NQZ2	TSAAACAVTDLSDDSDFDEK	C6(Carbamidomethyl); S12(Phospho); S15(Phospho)	T(1): 0.0; S(2): 0.0; T(9): 0.0; S(12): 100.0; S(15): 100.0	0	1.302e-09
B4DGH9	RGPNYTSGYGTNSELSNPSETESER	S19(Phospho)	Y(5): 0.0; T(6): 0.0; S(7): 0.0; Y(9): 0.0; T(11): 0.0; S(13): 0.0; S(16): 0.0; S(19): 99.8; T(21): 0.2; S(23): 0.0	0	1.303e-09
B2RDT9	KEEENADSDDEGELQDLLSQDWR	S8(Phospho)	S(8): 100.0; S(19): 0.0	0	1.304e-09
F8W7U3	AVASPEATVSQTDENK	S4(Phospho)	S(4): 100.0; T(8): 0.0; S(10): 0.0; T(12): 0.0	0	1.307e-09
Q9UHB7	SSSPGKPQAVSSLNSSHSR	S3(Phospho)	S(1): 3.8; S(2): 3.8; S(3): 92.4; S(11): 0.0; S(12): 0.0; S(15): 0.0; S(16): 0.0; S(18): 0.0	0	1.31e-09
H7C3M7	DSSSSLTDPQVSYVKSPAAER	S16(Phospho)	S(2): 0.0; S(3): 0.0; S(4): 0.0; S(5): 0.0; T(7): 0.0; S(12): 0.0; Y(13): 0.0; S(16): 100.0	0	1.311e-09
P08238	EKEISDDEAEEEKGEK	S5(Phospho)	S(5): 100.0	0	1.318e-09
Q9BXP5	LGSIAEIDLGVPPPVMK	S3(Phospho)	S(3): 100.0	0	1.321e-09
B4DQZ7	ELLVPQHTVQLVGGLSPLSSPSDTK	S16(Phospho)	T(8): 0.0; S(16): 100.0; S(19): 0.0; S(20): 0.0; S(22): 0.0; T(24): 0.0	0	1.324e-09
D6R9B8	KYSISSDNSDTTDSHATSTSASR	S3(Phospho)	Y(2): 0.1; S(3): 99.9; S(5): 0.0; S(6): 0.0; S(9): 0.0; T(11): 0.0; T(12): 0.0; S(14): 0.0; T(17): 0.0; S(18): 0.0; T(19): 0.0; S(20): 0.0; S(22): 0.0	0	1.326e-09
M0R3C8	TPESQPDTPPGTPLVSQDEK	T8(Phospho)	T(1): 0.0; S(4): 0.0; T(8): 100.0; T(12): 0.0; S(16): 0.0	0	1.326e-09
Q9UPT8	ENEEGDTGNWYSSDEDEGGSSVTSILK	S12(Phospho); S13(Phospho)	T(7): 98.6; Y(11): 5.5; S(12): 47.9; S(13): 47.9; S(20): 0.0; S(21): 0.0; T(23): 0.0; S(24): 0.0	0	1.329e-09
O60303	VVSPTKEQVSDTEDKQR	S3(Phospho)	S(3): 100.0; T(5): 0.0; S(10): 0.0; T(12): 0.0	0	1.334e-09
Q8TEW0	RSSDPALIGLSTSVSDSNFSSEEPSR	S3(Phospho)	S(2): 50.0; S(3): 50.0; S(11): 0.0; T(12): 0.0; S(13): 0.0; S(15): 0.0; S(17): 0.0; S(20): 0.0; S(21): 0.0; S(25): 0.0	0	1.337e-09
Q5T8I3	ILQSQDFSLDSSAEEEGLR	S11(Phospho); S12(Phospho)	S(4): 0.0; S(8): 0.0; S(11): 100.0; S(12): 100.0	0	1.356e-09
F1T0I1	SPDPGIVPQEAPVGNSLSELSEENFDGK	S1(Phospho)	S(1): 100.0; S(16): 0.0; S(18): 0.0; S(21): 0.0	0	1.361e-09
A0A024R3M0	GTGSGGQLQDLDCSSSDDEGAAQNSTKPSATK	C13(Carbamidomethyl); S15(Phospho); S16(Phospho)	T(2): 0.0; S(4): 0.0; S(14): 2.6; S(15): 98.7; S(16): 98.7; S(25): 0.0; T(26): 0.0; S(29): 0.0; T(31): 0.0	0	1.363e-09
A2RU67	SPLGEAPEPDSDAEVAEAAKPHLSEVTTEGYPSEPLGGLEQK	S11(Phospho)	S(1): 0.0; S(11): 100.0; S(24): 0.0; T(27): 0.0; T(28): 0.0; Y(31): 0.0; S(33): 0.0	0	1.368e-09
Q6PKG0	TKSDESGEEKNGDEDCQR	T1(Phospho); S6(Phospho); C16(Carbamidomethyl)	T(1): 99.8; S(3): 0.2; S(6): 100.0	0	1.371e-09
A0A024R7U6	GLQVDLQSDGAAAEDIVASEQSLGQK	S8(Phospho)	S(8): 100.0; S(19): 0.0; S(22): 0.0	0	1.411e-09
A1L3A9	ALLSSSDDPPAEVDIFELLK	S4(Phospho)	S(4): 96.1; S(5): 3.9; S(6): 0.0	0	1.417e-09
Q96I24	QSHAASAAPQASSPPDYTMAWAEYYR	S13(Phospho)	S(2): 0.0; S(6): 0.0; S(12): 5.8; S(13): 94.2; Y(17): 0.0; T(18): 0.0; Y(24): 0.0; Y(25): 0.0	0	1.423e-09
S4R3H4	GVPAGNSDTEGGQPGR	S7(Phospho)	S(7): 100.0; T(9): 0.0	0	1.427e-09
A0A024R755	VHNDAQSFDYDHDAFLGAEEAK	S7(Phospho)	S(7): 100.0; Y(10): 0.0	0	1.431e-09
Q6UN15	DHSPTPSVFNSDEER	S3(Phospho)	S(3): 100.0; T(5): 0.0; S(7): 0.0; S(11): 0.0	0	1.438e-09
Q9HB20	TYSDTDSCSDIPLEDPDRPVHCSK	S3(Phospho); C8(Carbamidomethyl); C22(Carbamidomethyl)	T(1): 0.0; Y(2): 0.0; S(3): 100.0; T(5): 0.0; S(7): 0.0; S(9): 0.0; S(23): 0.0	0	1.439e-09
Q12789	RASWASENGETDAEGTQMTPAK	S3(Phospho)	S(3): 100.0; S(6): 0.0; T(11): 0.0; T(16): 0.0; T(19): 0.0	0	1.444e-09
Q5T5U3	KDSSSEVFSDAAK	S3(Phospho)	S(3): 100.0; S(4): 0.0; S(5): 0.0; S(9): 0.0	0	1.455e-09
Q99569	VASPSQGQVGSSSPKR	S13(Phospho)	S(3): 0.0; S(5): 0.0; S(11): 33.3; S(12): 33.3; S(13): 33.3	0	1.469e-09
Q6IEH8	AAMYDIISSPSKDSTK	S9(Phospho)	Y(4): 0.0; S(8): 3.4; S(9): 96.6; S(11): 0.0; S(14): 0.0; T(15): 0.0	0	1.472e-09
P12270	AADSQNSGEGNTGAAESSFSQEVSR	S18(Phospho)	S(4): 0.0; S(7): 0.0; T(12): 0.0; S(17): 0.0; S(18): 99.7; S(20): 0.3; S(24): 0.0	0	1.476e-09
A4LAA3	DKRNSSDSAIDNPKPNK	S5(Phospho)	S(5): 100.0; S(6): 0.0; S(8): 0.0	0	1.478e-09
Q496C9	SASSGAEGDVSSEREP	S12(Phospho)	S(1): 0.0; S(3): 0.0; S(4): 0.0; S(11): 0.1; S(12): 99.9	0	1.502e-09
P04406	IISNASCTTNCLAPLAK	S6(Phospho); C7(Carbamidomethyl); C11(Carbamidomethyl)	S(3): 0.0; S(6): 100.0; T(8): 0.0; T(9): 0.0	0	1.505e-09
A8MQ02	SQDADSPGSSGAPENLTFK	S6(Phospho)	S(1): 0.0; S(6): 100.0; S(9): 0.0; S(10): 0.0; T(17): 0.0	0	1.505e-09
Q9BVV8	RYGLLANTEDPTEMASLDSDEETVFESR	S19(Phospho)	Y(2): 0.0; T(8): 0.0; T(12): 0.0; S(16): 0.0; S(19): 100.0; T(23): 0.0; S(27): 0.0	0	1.508e-09
B4DY23	KPEDVLDDDDAGSAPLK	S13(Phospho)	S(13): 100.0	0	1.51e-09
A0A024R3E4	QASTDAGTAGALTPQHVR	S3(Phospho)	S(3): 100.0; T(4): 0.0; T(8): 0.0; T(13): 0.0	0	1.511e-09
O43719	LFEESDDKEDEDADGKEVEDADEK	S5(Phospho)	S(5): 100.0	0	1.513e-09
Q86U42	QMNMSPPPGNAGPVIMSIEEK	S5(Phospho)	S(5): 100.0; S(17): 0.0	0	1.516e-09
A8K594	SCHDLDLLGQSPGWGQTQAVETNIVCK	S1(Phospho); C2(Carbamidomethyl); C26(Carbamidomethyl)	S(1): 100.0; S(11): 0.0; T(17): 0.0; T(22): 0.0	0	1.527e-09
Q12906	DSSKGEDSAEETEAKPAVVAPAPVVEAVSTPSAAFPSDATAEQGPILTK	S2(Phospho)	S(2): 87.5; S(3): 10.1; S(8): 1.2; T(12): 1.2; S(29): 0.0; T(30): 0.0; S(32): 0.0; S(37): 0.0; T(40): 0.0; T(48): 0.0	0	1.532e-09
B4DQZ7	ELLVPQHTVQLVGGLSPLSSPSDTKAESPAEK	S16(Phospho)	T(8): 0.0; S(16): 100.0; S(19): 0.0; S(20): 0.0; S(22): 0.0; T(24): 0.0; S(28): 0.0	0	1.534e-09
C9JR84	SHSSPASLQLGTGAGAAGSPAQQHAHLR	S3(Phospho)	S(1): 0.4; S(3): 93.7; S(4): 5.6; S(7): 0.4; T(12): 0.0; S(19): 0.0	0	1.538e-09
Q9H9J4	DSALAEAPEGLSPAPPAR	S12(Phospho)	S(2): 0.0; S(12): 100.0	0	1.539e-09
A8K330	VQDTSNTGLGEDIIHQLSK	S5(Phospho)	T(4): 0.0; S(5): 100.0; T(7): 0.0; S(18): 0.0	0	1.541e-09
Q9H6L6	QVVSVVQDEEVGLPFEASPESPPPASPDGVTEIR	S26(Phospho)	S(4): 0.0; S(18): 0.0; S(21): 0.0; S(26): 100.0; T(31): 0.0	0	1.548e-09
Q96FS1	SYEDMIGEEVPSDQYYWAPLAQHER	S1(Phospho)	S(1): 95.1; Y(2): 4.9; S(12): 0.0; Y(15): 0.0; Y(16): 0.0	0	1.549e-09
Q9H1B7	KASPEPPDSAEGALK	S3(Phospho)	S(3): 100.0; S(9): 0.0	0	1.552e-09
B3KNP0	ALEEGDGSVSGSSPR	S13(Phospho)	S(8): 0.0; S(10): 0.0; S(12): 0.0; S(13): 100.0	0	1.568e-09
Q86UP2	EIQNGNLHESDSESVPR	S10(Phospho)	S(10): 100.0; S(12): 0.0; S(14): 0.0	0	1.573e-09
Q5UIP0	RDSFDNCSLGESSK	S3(Phospho); C7(Carbamidomethyl)	S(3): 100.0; S(8): 0.0; S(12): 0.0; S(13): 0.0	0	1.585e-09
Q8IVT2	NALFPEVFSPTPDENSDQNSR	S9(Phospho)	S(9): 100.0; T(11): 0.0; S(16): 0.0; S(20): 0.0	0	1.586e-09
Q5T200	SKGDSDISDEEAAQQSK	S1(Phospho); S5(Phospho); S8(Phospho)	S(1): 100.0; S(5): 100.0; S(8): 100.0; S(16): 0.0	0	1.588e-09
B7Z3B9	TASDTDSSYCIPTAGMSPSR	C10(Carbamidomethyl); S17(Phospho)	T(1): 0.0; S(3): 0.0; T(5): 0.0; S(7): 0.0; S(8): 0.0; Y(9): 0.0; T(13): 0.0; S(17): 4.3; S(19): 95.7	0	1.588e-09
Q32MZ4	ALDSNSLENDDLSAPGREPGHFNPESR	S4(Phospho)	S(4): 100.0; S(6): 0.0; S(13): 0.0; S(26): 0.0	0	1.602e-09
C9JMQ4	RGPSASSVAVMTSSTSDHHLDAAAAR	S16(Phospho)	S(4): 0.0; S(6): 0.0; S(7): 0.0; T(12): 0.0; S(13): 0.0; S(14): 0.1; T(15): 49.9; S(16): 49.9	0	1.614e-09
Q5H924	AGSSTPGDAPPAVAEVQGR	S3(Phospho)	S(3): 99.8; S(4): 0.2; T(5): 0.0	0	1.615e-09
A0A024R4A5	ALSSGGSITSPPLSPALPK	S10(Phospho)	S(3): 0.0; S(4): 0.0; S(7): 0.0; T(9): 0.2; S(10): 99.8; S(14): 0.0	0	1.64e-09
Q9C0C2	SFGTRPLSSGFSPEEAQQQDEEFEK	S8(Phospho)	S(1): 0.2; T(4): 4.0; S(8): 91.8; S(9): 4.0; S(12): 0.0	0	1.644e-09
B4DYT5	TPHDILEDINASPEMR	S12(Phospho)	T(1): 0.0; S(12): 100.0	0	1.646e-09
O95155	SQSSEGVSSLSSSPSNSLETQSQSLSR	S12(Phospho); S13(Phospho)	S(1): 0.0; S(3): 0.0; S(4): 0.0; S(8): 0.0; S(9): 0.0; S(11): 1.0; S(12): 99.1; S(13): 99.8; S(15): 0.1; S(17): 0.0; T(20): 0.0; S(22): 0.0; S(24): 0.0; S(26): 0.0	0	1.649e-09
Q86X27	SVAAEGALLPQTPPSPR	S15(Phospho)	S(1): 0.0; T(12): 4.0; S(15): 96.0	0	1.649e-09
P51116	TGGPAYGPSSDVSTASETESEKR	S16(Phospho)	T(1): 0.0; Y(6): 0.0; S(9): 0.0; S(10): 0.0; S(13): 0.0; T(14): 2.3; S(16): 47.7; T(18): 47.7; S(20): 2.3	0	1.65e-09
O95149	LAEDDWTGMESEEENKKDDEEMDIDTVK	S11(Phospho)	T(7): 0.0; S(11): 100.0; T(26): 0.0	0	1.653e-09
J3KS94	DRPSESDELQTIQEDSAATSESLDVMASQK	S4(Phospho)	S(4): 99.6; S(6): 0.4; T(11): 0.0; S(16): 0.0; T(19): 0.0; S(20): 0.0; S(22): 0.0; S(28): 0.0	0	1.661e-09
Q8N9T8	YVDEENSDGETSNHR	S7(Phospho)	Y(1): 0.0; S(7): 100.0; T(11): 0.0; S(12): 0.0	0	1.661e-09
Q13428	SPAGPAATPAQAQAASTPR	T17(Phospho)	S(1): 0.0; T(8): 0.0; S(16): 3.4; T(17): 96.6	0	1.664e-09
J3KNG8	NESSDSALGDSESEDTGHDMTR	S11(Phospho)	S(3): 0.0; S(4): 0.0; S(6): 0.0; S(11): 100.0; S(13): 0.0; T(16): 0.0; T(21): 0.0	0	1.669e-09
B4E157	RNSLILKPKPDPAQQTDSQNSDTEQYFR	S3(Phospho)	S(3): 100.0; T(16): 0.0; S(18): 0.0; S(21): 0.0; T(23): 0.0; Y(26): 0.0	0	1.671e-09
O75592	SKSDSYTLDPDTLR	S3(Phospho)	S(1): 0.1; S(3): 99.9; S(5): 0.0; Y(6): 0.0; T(7): 0.0; T(12): 0.0	0	1.678e-09
Q14789	QASPETSASPDGSQNLVYETELLR	S3(Phospho)	S(3): 94.7; T(6): 5.0; S(7): 0.3; S(9): 0.0; S(13): 0.0; Y(18): 0.0; T(20): 0.0	0	1.687e-09
P41236	IQEQESSGEEDSDLSPEER	S7(Phospho)	S(6): 3.3; S(7): 96.7; S(12): 0.0; S(15): 0.0	0	1.689e-09
B4DSW1	ESPEGSYTDDANQEVR	S2(Phospho)	S(2): 100.0; S(6): 0.0; Y(7): 0.0; T(8): 0.0	0	1.699e-09
Q96Q15	NLATSADTPPSTVPGTGK	S5(Phospho); T8(Phospho)	T(4): 0.0; S(5): 100.0; T(8): 100.0; S(11): 0.0; T(12): 0.0; T(16): 0.0	0	1.702e-09
B4DMF7	HGSGADSDYENTQSGDPLLGLEGK	S3(Phospho)	S(3): 100.0; S(7): 0.0; Y(9): 0.0; T(12): 0.0; S(14): 0.0	0	1.711e-09
Q86TC9	EAEQAASEAAGGDTTPGSSPSSLYYEEPLGQPPR	S19(Phospho)	S(7): 0.0; T(14): 0.0; T(15): 0.0; S(18): 49.8; S(19): 49.8; S(21): 0.3; S(22): 0.0; Y(24): 0.0; Y(25): 0.0	0	1.738e-09
P18858	EEEEEETPKESLTEAEVATEKEGEDGDQPTTPPKPLK	T31(Phospho)	T(7): 0.0; S(11): 0.0; T(13): 0.0; T(19): 0.0; T(30): 0.5; T(31): 99.5	0	1.739e-09
Q12789	NSSTDQGSDEEGSLQK	S8(Phospho)	S(2): 0.0; S(3): 0.0; T(4): 0.0; S(8): 100.0; S(13): 0.0	0	1.74e-09
P08047	SSSTGSSSSTGGGGQESQPSPLALLAATCSR	S20(Phospho); C29(Carbamidomethyl)	S(1): 0.0; S(2): 0.0; S(3): 0.0; T(4): 0.0; S(6): 0.0; S(7): 0.0; S(8): 0.0; S(9): 0.0; T(10): 0.0; S(17): 0.0; S(20): 100.0; T(28): 0.0; S(30): 0.0	0	1.766e-09
B4DYY5	SPAVATSTAAPPPPSSPLPSK	S16(Phospho)	S(1): 0.0; T(6): 0.0; S(7): 0.0; T(8): 0.0; S(15): 50.0; S(16): 50.0; S(20): 0.1	0	1.768e-09
Q9ULJ3	IQPLEPDSPTGLSENPTPATEK	S8(Phospho)	S(8): 99.7; T(10): 0.3; S(13): 0.0; T(17): 0.0; T(20): 0.0	0	1.817e-09
Q96KQ7	LNSGGGLSEELGSAR	S3(Phospho)	S(3): 100.0; S(8): 0.0; S(13): 0.0	0	1.846e-09
Q14151	VTPDIEESLLEPENEK	S8(Phospho)	T(2): 0.0; S(8): 100.0	0	1.859e-09
P10398	STSTPNVHMVSTTAPMDSNLIQLTGQSFSTDAAGSR	S11(Phospho)	S(1): 7.2; T(2): 7.2; S(3): 76.1; T(4): 7.2; S(11): 0.7; T(12): 0.7; T(13): 0.7; S(18): 0.0; T(24): 0.0; S(27): 0.0; S(29): 0.0; T(30): 0.0; S(35): 0.0	0	1.861e-09
Q9UGU0	QLSGQSTSSDTTYK	S3(Phospho)	S(3): 100.0; S(6): 0.0; T(7): 0.0; S(8): 0.0; S(9): 0.0; T(11): 0.0; T(12): 0.0; Y(13): 0.0	0	1.862e-09
Q8IWZ3	VSTSPVGLPSIDPSGSSPSSSSAPLASFSGIPGTR	S4(Phospho)	S(2): 33.3; T(3): 33.3; S(4): 33.3; S(10): 0.0; S(14): 0.0; S(16): 0.0; S(17): 0.0; S(19): 0.0; S(20): 0.0; S(21): 0.0; S(22): 0.0; S(27): 0.0; S(29): 0.0; T(34): 0.0	0	1.869e-09
P12270	GLQLTPGIGGMQQHFFDDEDR	T5(Phospho)	T(5): 100.0	0	1.875e-09
P20700	LSSEMNTSTVNSAR	S8(Phospho)	S(2): 0.0; S(3): 0.0; T(7): 0.1; S(8): 97.6; T(9): 2.3; S(12): 0.0	0	1.878e-09
B4DL02	ELFDDPSYVNVQNLDK	Y8(Phospho)	S(7): 50.0; Y(8): 50.0	0	1.882e-09
S5FZ81	NKGTSDSSSGNVSEGESPPDSQEDSFQGR	S13(Phospho)	T(4): 0.0; S(5): 0.0; S(7): 0.0; S(8): 0.0; S(9): 0.0; S(13): 100.0; S(17): 0.0; S(21): 0.0; S(25): 0.0	0	1.899e-09
Q60FE6	RAPSVANVGSHCDLSLK	S4(Phospho); C12(Carbamidomethyl)	S(4): 100.0; S(10): 0.0; S(15): 0.0	0	1.913e-09
Q9Y4H2	KSSEGGVGVGPGGGDEPPTSPR	S20(Phospho)	S(2): 0.0; S(3): 0.0; T(19): 2.9; S(20): 97.1	0	1.918e-09
P67809	NEGSESAPEGQAQQR	S6(Phospho)	S(4): 0.0; S(6): 100.0	0	1.937e-09
O43463	MDSNFGLAGLPGSPK	S13(Phospho)	S(3): 0.0; S(13): 100.0	0	1.956e-09
Q9Y4E8	GPSTPKSPGASNFSTLPK	S7(Phospho)	S(3): 0.0; T(4): 0.0; S(7): 100.0; S(11): 0.0; S(14): 0.0; T(15): 0.0	0	1.972e-09
Q9BVJ6	EQMIDLQNLLTTQSPSVK	S14(Phospho)	T(11): 0.0; T(12): 0.0; S(14): 97.0; S(16): 3.0	0	1.986e-09
A0PJD3	RASQEANLLTLAQK	S3(Phospho)	S(3): 100.0; T(10): 0.0	0	1.99e-09
B4DVQ5	QPLLLSEDEEDTKR	S6(Phospho)	S(6): 100.0; T(12): 0.0	0	2.003e-09
Q92667	KTESFQNAQAGSNPK	S4(Phospho)	T(2): 0.0; S(4): 100.0; S(12): 0.0	0	2.004e-09
B7Z6N1	LGRGSVSDCSDGTSELEEPLGEDPR	S7(Phospho); C9(Carbamidomethyl)	S(5): 99.7; S(7): 0.3; S(10): 0.0; T(13): 0.0; S(14): 0.0	0	2.019e-09
B4DYY5	STSAPQMSPGSSDNQSSSPQPAQQK	S8(Phospho)	S(1): 3.0; T(2): 3.0; S(3): 47.0; S(8): 47.0; S(11): 0.0; S(12): 0.0; S(16): 0.0; S(17): 0.0; S(18): 0.0	0	2.039e-09
B9EIS5	NVRSDISDQEEDEESEGCPVSINLSK	S4(Phospho); S7(Phospho); C18(Carbamidomethyl)	S(4): 100.0; S(7): 100.0; S(15): 0.0; S(21): 0.0; S(25): 0.0	0	2.046e-09
Q16626	IQALGLHLPDPPLESEDEDEEGATALNNHSSIPMDPEHVELVK	S15(Phospho)	S(15): 100.0; T(24): 0.0; S(30): 0.0; S(31): 0.0	0	2.055e-09
C9JAT7	SESLIDASEDSQLEAAIR	S3(Phospho); S11(Phospho)	S(1): 0.0; S(3): 100.0; S(8): 0.0; S(11): 100.0	0	2.067e-09
Q12888	KNGSTAVAESVASPQK	S13(Phospho)	S(4): 0.0; T(5): 0.0; S(10): 0.0; S(13): 100.0	0	2.069e-09
Q9NZ63	GDSESEEDEQDSEEVR	S3(Phospho); S5(Phospho)	S(3): 100.0; S(5): 100.0; S(12): 0.0	0	2.087e-09
B4E091	FGESEEVEMEVESDEEDDKQEK	S13(Phospho)	S(4): 0.0; S(13): 100.0	0	2.096e-09
B4DY08	SAAEMYGSSFDLDYDFQR	S9(Phospho)	S(1): 0.0; Y(6): 0.0; S(8): 50.0; S(9): 50.0; Y(14): 0.0	0	2.105e-09
Q5VZL5	VTQHESDNENEIQIQNK	S6(Phospho)	T(2): 0.0; S(6): 100.0	0	2.117e-09
D3DNX8	LLKPGEEPSEYTDEEDTK	T12(Phospho)	S(9): 0.0; Y(11): 0.0; T(12): 100.0; T(17): 0.0	0	2.128e-09
A8KAQ5	GGGGDMAEPSEAGDAPPDDGPPGELGPDGPDGPEEK	S10(Phospho)	S(10): 100.0	0	2.13e-09
Q9C0D5	RADNCSPVAEEETTGSAESTLPK	C5(Carbamidomethyl); S6(Phospho)	S(6): 100.0; T(13): 0.0; T(14): 0.0; S(16): 0.0; S(19): 0.0; T(20): 0.0	0	2.144e-09
A0A075B784	GSSSSSPEHSASSDSTK	S6(Phospho)	S(2): 0.0; S(3): 0.0; S(4): 0.0; S(5): 0.0; S(6): 100.0; S(10): 0.0; S(12): 0.0; S(13): 0.0; S(15): 0.0; T(16): 0.0	0	2.145e-09
E9PEE2	DASPTPSTDAEYPANGSGADR	S3(Phospho)	S(3): 100.0; T(5): 0.0; S(7): 0.0; T(8): 0.0; Y(12): 0.0; S(17): 0.0	0	2.147e-09
B3KSZ4	LTPSPDIIVLSDNEASSPR	S11(Phospho)	T(2): 0.0; S(4): 0.0; S(11): 100.0; S(16): 0.0; S(17): 0.0	0	2.147e-09
Q9NYF8	GRAEGEWEDQEALDYFSDKESGK	S17(Phospho)	Y(15): 0.0; S(17): 100.0; S(21): 0.0	0	2.17e-09
F8W9S7	EVSSRPSTPGLSVVSGISATSEDIPNK	S4(Phospho); S7(Phospho)	S(3): 49.0; S(4): 49.0; S(7): 51.0; T(8): 51.0; S(12): 0.0; S(15): 0.0; S(18): 0.0; T(20): 0.0; S(21): 0.0	0	2.177e-09
B3KUF5	AADRLPNLSSPSAEGPPGPPSGPAPR	S9(Phospho)	S(9): 94.6; S(10): 5.4; S(12): 0.0; S(21): 0.0	0	2.179e-09
Q8NBP1	KYSDSSLPPSNSGK	S3(Phospho)	Y(2): 0.0; S(3): 100.0; S(5): 0.0; S(6): 0.0; S(10): 0.0; S(12): 0.0	0	2.179e-09
Q9Y4H2	KSSEGGVGVGPGGGDEPPTSPR	S3(Phospho); S20(Phospho)	S(2): 0.2; S(3): 99.8; T(19): 0.2; S(20): 99.8	0	2.197e-09
A8K5B0	YNDWSDDDDDSNESK	S5(Phospho)	Y(1): 0.0; S(5): 100.0; S(11): 0.0; S(14): 0.0	0	2.205e-09
K7ELA4	KADSDSEDKGEESKPK	S4(Phospho)	S(4): 100.0; S(6): 0.0; S(13): 0.0	0	2.208e-09
B3KX07	SNSAPLIHGLSDTSPVFQAEAPSAR	S3(Phospho)	S(1): 4.9; S(3): 95.1; S(11): 0.0; T(13): 0.0; S(14): 0.0; S(23): 0.0	0	2.211e-09
Q9NXG2	FTDKDQQPSGSEGEDDDAEAALKK	S9(Phospho)	T(2): 0.0; S(9): 94.9; S(11): 5.1	0	2.213e-09
D6RFG4	HFFHHADEDDEEEDDSPPER	S16(Phospho)	S(16): 100.0	0	2.222e-09
B4DQ46	NSLLAGGDDDTMSVISGISSR	S13(Phospho)	S(2): 0.0; T(11): 0.0; S(13): 100.0; S(16): 0.0; S(19): 0.0; S(20): 0.0	0	2.224e-09
Q7KZ85	DHYQDPVPGITPSSSSR	T11(Phospho)	Y(3): 0.0; T(11): 99.8; S(13): 0.2; S(14): 0.0; S(15): 0.0; S(16): 0.0	0	2.226e-09
H0Y6J6	SPTGPSNSFLANMGGTVAHK	S1(Phospho)	S(1): 99.9; T(3): 0.1; S(6): 0.0; S(8): 0.0; T(16): 0.0	0	2.23e-09
F8WBF5	SVEDDEEGHLICQSGDVLSAR	S1(Phospho); C12(Carbamidomethyl)	S(1): 100.0; S(14): 0.0; S(19): 0.0	0	2.232e-09
B4E091	AEEPPSQLDQDTQVQDMDEGSDDEEEGQK	S21(Phospho)	S(6): 0.0; T(12): 0.0; S(21): 100.0	0	2.244e-09
Q86TR8	TSSASEQETQAPKPEASPSMSVAASEQQEPK	S3(Phospho)	T(1): 6.1; S(2): 6.1; S(3): 87.8; S(5): 0.0; T(9): 0.0; S(17): 0.0; S(19): 0.0; S(21): 0.0; S(25): 0.0	0	2.247e-09
B4DXW2	EGAASPAPETPQPTSPETSPK	S15(Phospho)	S(5): 0.0; T(10): 0.0; T(14): 4.3; S(15): 95.6; T(18): 0.0; S(19): 0.0	0	2.249e-09
F8W7U3	LAAQESSETEDMSVPR	S7(Phospho)	S(6): 2.9; S(7): 97.0; T(9): 0.1; S(13): 0.0	0	2.256e-09
B4DLM0	TDASSASSFLDSDELER	S12(Phospho)	T(1): 0.0; S(4): 0.0; S(5): 0.0; S(7): 0.0; S(8): 0.0; S(12): 100.0	0	2.267e-09
O43432	GGSSKDLLDNQSQEEQR	S3(Phospho)	S(3): 100.0; S(4): 0.0; S(12): 0.0	0	2.271e-09
Q5JSH3	GKELSDQATASPIVAR	S11(Phospho)	S(5): 0.0; T(9): 0.0; S(11): 100.0	0	2.273e-09
B3KMU4	QLLDSDEEQEEDEGR	S5(Phospho)	S(5): 100.0	0	2.282e-09
A0A087WWJ1	AGFDSDYDQALADIR	S5(Phospho)	S(5): 100.0; Y(7): 0.0	0	2.288e-09
Q9NZ53	FVENGCHDNPTLDVASDSQSEMQEK	C6(Carbamidomethyl); S20(Phospho)	T(11): 0.0; S(16): 0.0; S(18): 4.7; S(20): 95.3	0	2.29e-09
J3KPS2	LSSATANALYSSNLR	S3(Phospho)	S(2): 0.0; S(3): 100.0; T(5): 0.0; Y(10): 0.0; S(11): 0.0; S(12): 0.0	0	2.295e-09
Q8N3E9	ALSDREEEEEDDEEEEEEVEAAAQR	S3(Phospho)	S(3): 100.0	0	2.307e-09
Q8WVC0	AQGSDEDKLQNSDDDEK	S4(Phospho)	S(4): 100.0; S(12): 0.0	0	2.316e-09
A0A024QZC2	SSEDLAGPLPSSVSSSSTTSSKPK	S2(Phospho)	S(1): 50.0; S(2): 50.0; S(11): 0.0; S(12): 0.0; S(14): 0.0; S(15): 0.0; S(16): 0.0; S(17): 0.0; T(18): 0.0; T(19): 0.0; S(20): 0.0; S(21): 0.0	0	2.329e-09
E9PM92	SASPDDDLGSSNWEAADLGNEER	S3(Phospho)	S(1): 50.0; S(3): 50.0; S(10): 0.0; S(11): 0.0	0	2.347e-09
Q9NW97	QGEDLAHVQHPTGAGPHAQEEDSQEEEEEDEEAASR	S23(Phospho)	T(12): 0.0; S(23): 100.0; S(35): 0.0	0	2.356e-09
H3BPL0	RRFSDSEGEETVPEPR	S4(Phospho)	S(4): 100.0; S(6): 0.0; T(11): 0.0	0	2.358e-09
A0A024R233	KVQVAALQASPPLDQDDR	S10(Phospho)	S(10): 100.0	0	2.367e-09
K7ESE9	LNSQDSYNNFTNNNPGNPR	S6(Phospho)	S(3): 0.0; S(6): 95.8; Y(7): 4.2; T(11): 0.0	0	2.397e-09
G5E9C0	DNSPEPNDPEEPQEVSSTPSDKK	S3(Phospho)	S(3): 100.0; S(16): 0.0; S(17): 0.0; T(18): 0.0; S(20): 0.0	0	2.399e-09
P16401	SETAPAETATPAPVEKSPAK	S17(Phospho)	S(1): 0.0; T(3): 0.0; T(8): 0.0; T(10): 0.0; S(17): 100.0	0	2.431e-09
Q6FI30	TEMDKSPFNSPSPQDSPR	S12(Phospho)	T(1): 0.0; S(6): 0.0; S(10): 0.0; S(12): 100.0; S(16): 0.0	0	2.436e-09
Q13442	KSLDSDESEDEEDDYQQK	S5(Phospho); S8(Phospho)	S(2): 0.0; S(5): 100.0; S(8): 100.0; Y(15): 0.0	0	2.441e-09
Q6PKG0	GLSASLPDLDSENWIEVK	S5(Phospho)	S(3): 0.0; S(5): 100.0; S(11): 0.0	0	2.442e-09
A4LAA3	MSHSSSSDTDINEIHTNHK	S5(Phospho)	S(2): 0.0; S(4): 0.0; S(5): 93.4; S(6): 3.3; S(7): 3.3; T(9): 0.0; T(16): 0.0	0	2.468e-09
P22670	ASETVSEASPGSTASQTGVPTQVVQQVQGTQQR	S2(Phospho)	S(2): 91.7; T(4): 8.3; S(6): 0.1; S(9): 0.0; S(12): 0.0; T(13): 0.0; S(15): 0.0; T(17): 0.0; T(21): 0.0; T(30): 0.0	0	2.477e-09
M0R3F1	APQQQPPPQQPPPPQPPPQQPPPPPSYSPAR	S28(Phospho)	S(26): 33.3; Y(27): 33.3; S(28): 33.3	0	2.482e-09
B3KMC8	SSDSHSDSDGEQEAEEGGVSTETEKPK	S2(Phospho); S4(Phospho); S6(Phospho)	S(1): 67.4; S(2): 67.4; S(4): 67.4; S(6): 96.4; S(8): 1.5; S(20): 0.0; T(21): 0.0; T(23): 0.0	0	2.49e-09
B2RDV7	QENCGAQQVPAGPGTSTPPSSPVR	C4(Carbamidomethyl); T17(Phospho); S21(Phospho)	T(15): 0.3; S(16): 5.2; T(17): 94.5; S(20): 50.0; S(21): 50.0	0	2.51e-09
Q13523	LCDFGSASHVADNDITPYLVSR	C2(Carbamidomethyl); Y18(Phospho)	S(6): 0.0; S(8): 0.0; T(16): 0.0; Y(18): 99.8; S(21): 0.2	0	2.518e-09
D3DWB6	NGILAIEGTGSDVDDDMSGDEK	S18(Phospho)	T(9): 0.0; S(11): 0.0; S(18): 100.0	0	2.518e-09
Q8NAV1	VSALEEDMDDVESSEEEEEEDEKLER	S13(Phospho); S14(Phospho)	S(2): 0.0; S(13): 100.0; S(14): 100.0	0	2.529e-09
B7Z5N6	HISESCPFPSPGGQLAEVHSVSPEQGAK	C6(Carbamidomethyl); S22(Phospho)	S(3): 0.0; S(5): 0.0; S(10): 0.0; S(20): 4.6; S(22): 95.4	0	2.53e-09
Q59FL8	GSHQISLDNPDYQQDFFPK	S6(Phospho)	S(2): 0.0; S(6): 100.0; Y(12): 0.0	0	2.532e-09
Q7KZE5	GGGSAAAAAAAAASGGGVSPDNSIEHSDYR	S19(Phospho)	S(4): 0.0; S(14): 0.0; S(19): 99.4; S(23): 0.6; S(27): 0.0; Y(29): 0.0	0	2.535e-09
P22059	SLSELESLKLPAESNEK	S1(Phospho)	S(1): 50.0; S(3): 50.0; S(7): 0.0; S(14): 0.0	0	2.554e-09
D6RGI7	TDEVPAGGSRSEAEDEDDEDYVPYVPLR	S9(Phospho)	T(1): 0.0; S(9): 93.5; S(11): 6.5; Y(21): 0.0; Y(24): 0.0	0	2.564e-09
O14646	QIDSSEEDDDEEDYDNDKR	S4(Phospho); S5(Phospho)	S(4): 100.0; S(5): 100.0; Y(14): 0.0	0	2.567e-09
E9PJ38	KLSGDQITLPTTVDYSSVPK	S3(Phospho)	S(3): 100.0; T(8): 0.0; T(11): 0.0; T(12): 0.0; Y(15): 0.0; S(16): 0.0; S(17): 0.0	0	2.569e-09
B3KW33	LIDSSGSASVLTHSSSGNSLK	S16(Phospho)	S(4): 0.0; S(5): 0.0; S(7): 0.0; S(9): 0.0; T(12): 0.0; S(14): 0.2; S(15): 4.6; S(16): 95.2; S(19): 0.0	0	2.571e-09
A0A087WZZ5	SSLGQSASETEEDTVSVSK	S8(Phospho)	S(1): 0.0; S(2): 0.0; S(6): 0.0; S(8): 99.9; T(10): 0.1; T(14): 0.0; S(16): 0.0; S(18): 0.0	0	2.579e-09
P22059	TGSNISGASSDISLDEQYK	S3(Phospho); S6(Phospho)	T(1): 5.6; S(3): 94.4; S(6): 100.0; S(9): 0.0; S(10): 0.0; S(13): 0.0; Y(18): 0.0	0	2.584e-09
O60346	RPGHPAQPLPLPQTASSPQPQQK	S17(Phospho)	T(14): 0.2; S(16): 3.9; S(17): 95.9	0	2.591e-09
Q8ND04	QASTVEYLPGMLHSNCPK	S3(Phospho); C16(Carbamidomethyl)	S(3): 99.8; T(4): 0.2; Y(7): 0.0; S(14): 0.0	0	2.601e-09
Q2T9J0	GRPGLCTPQCASLEPGPPAPSR	C6(Carbamidomethyl); T7(Phospho); C10(Carbamidomethyl)	T(7): 100.0; S(12): 0.0; S(21): 0.0	0	2.622e-09
Q8TB45	RSSMSSCGSSGYFSSSPTLSSSPPVLCNPK	S3(Phospho); C7(Carbamidomethyl); C27(Carbamidomethyl)	S(2): 7.3; S(3): 90.8; S(5): 0.6; S(6): 0.1; S(9): 0.6; S(10): 0.6; Y(12): 0.1; S(14): 0.0; S(15): 0.0; S(16): 0.0; T(18): 0.0; S(20): 0.0; S(21): 0.0; S(22): 0.0	0	2.633e-09
Q13610	EKLQEEGGGSDEEETGSPSEDGMQSAR	S10(Phospho); S17(Phospho)	S(10): 100.0; T(15): 0.0; S(17): 100.0; S(19): 0.0; S(25): 0.0	0	2.659e-09
E7ESM9	SESELIDELSEDFDR	S10(Phospho)	S(1): 0.0; S(3): 0.0; S(10): 100.0	0	2.666e-09
A0JLU2	TLAPSPKSPGDFTSAAQLASTPFHK	S5(Phospho); S8(Phospho)	T(1): 11.1; S(5): 94.5; S(8): 94.5; T(13): 0.0; S(14): 0.0; S(20): 0.0; T(21): 0.0	0	2.681e-09
Q9Y343	AESCGSFDETESEESSK	C4(Carbamidomethyl); S6(Phospho)	S(3): 0.0; S(6): 100.0; T(10): 0.0; S(12): 0.0; S(15): 0.0; S(16): 0.0	0	2.713e-09
P35611	SPGSPVGEGTGSPPK	S4(Phospho)	S(1): 0.0; S(4): 100.0; T(10): 0.0; S(12): 0.0	0	2.717e-09
P18858	GQKPALDCSQVSPPRPATSPENNASLSDTSPMDSSPSGIPK	C8(Carbamidomethyl); S12(Phospho)	S(9): 9.9; S(12): 89.8; T(18): 0.1; S(19): 0.0; S(25): 0.1; S(27): 0.0; T(29): 0.0; S(30): 0.0; S(34): 0.0; S(35): 0.0; S(37): 0.0	0	2.724e-09
B3KXA1	RGSLEMSSDGEPLSR	S3(Phospho)	S(3): 100.0; S(7): 0.0; S(8): 0.0; S(14): 0.0	0	2.758e-09
Q6FI30	NWTEDMEGGISSPVKK	S12(Phospho)	T(3): 0.0; S(11): 2.8; S(12): 97.2	0	2.766e-09
P15036	VPSFESFEDDCSQSLCLNKPTMSFK	S3(Phospho); C11(Carbamidomethyl); C16(Carbamidomethyl)	S(3): 100.0; S(6): 0.0; S(12): 0.0; S(14): 0.0; T(21): 0.0; S(23): 0.0	0	2.779e-09
B3KN49	SDDTSDDDFMEEGGEEDGGSDGMGGDGSEFLQR	S1(Phospho)	S(1): 81.5; T(4): 9.2; S(5): 9.2; S(20): 0.0; S(28): 0.0	0	2.78e-09
A0A087WWJ1	SEEDNEIESEEEVQPK	S9(Phospho)	S(1): 0.0; S(9): 100.0	0	2.78e-09
E5KLB6	FSGFSAKPNNSGEAPSSPTPK	S17(Phospho)	S(2): 0.0; S(5): 0.0; S(11): 0.0; S(16): 0.1; S(17): 99.9; T(19): 0.0	0	2.782e-09
Q15651	EGTAPSENGETKAEEAQK	S6(Phospho)	T(3): 0.0; S(6): 96.4; T(11): 3.6	0	2.788e-09
E9PK01	KPATPAEDDEDDDIDLFGSDNEEEDK	S19(Phospho)	T(4): 0.0; S(19): 100.0	0	2.79e-09
Q12888	NGSTAVAESVASPQK	S12(Phospho)	S(3): 0.0; T(4): 0.0; S(9): 0.0; S(12): 100.0	0	2.795e-09
B4E0B7	YQPLASTASDNDFVTPEPR	S6(Phospho); S9(Phospho)	Y(1): 0.0; S(6): 96.7; T(7): 3.3; S(9): 100.0; T(15): 0.0	0	2.799e-09
Q96ST2	KAAVLSDSEDEEKASAK	S6(Phospho); S8(Phospho)	S(6): 100.0; S(8): 100.0; S(15): 0.0	0	2.812e-09
S4R3H4	LSEGSQPAEEEEDQETPSR	T16(Phospho)	S(2): 0.0; S(5): 0.0; T(16): 96.8; S(18): 3.2	0	2.815e-09
B4DKX3	SNSEVEDVGPTSHNR	S3(Phospho)	S(1): 0.0; S(3): 100.0; T(11): 0.0; S(12): 0.0	0	2.818e-09
B2RAH5	DKKSPLIESTANMDNNQSQK	S4(Phospho)	S(4): 100.0; S(9): 0.0; T(10): 0.0; S(18): 0.0	0	2.827e-09
D6W5Z8	GGPGAAPGGASPASSSSAASSPSSGR	S21(Phospho)	S(11): 0.0; S(14): 0.0; S(15): 0.0; S(16): 0.0; S(17): 0.0; S(20): 4.6; S(21): 90.5; S(23): 4.6; S(24): 0.2	0	2.829e-09
Q09666	HRSNSFSDEREFSGPSTPTGTLEFEGGEVSLEGGK	S3(Phospho); S5(Phospho)	S(3): 10.9; S(5): 10.9; S(7): 2.5; S(13): 10.9; S(16): 78.1; T(17): 86.5; T(19): 0.0; T(21): 0.0; S(30): 0.0	0	2.835e-09
Q8IVT2	ASTPDWVSEGPQPGLR	T3(Phospho)	S(2): 0.1; T(3): 99.9; S(8): 0.0	0	2.861e-09
B4E1K0	SVSPSPVPLLFQPDQNAPPIR	S1(Phospho)	S(1): 50.0; S(3): 50.0; S(5): 0.0	0	2.863e-09
Q6IQ22	AGGGGGLGAGSPALSGGQGR	S11(Phospho)	S(11): 100.0; S(15): 0.0	0	2.865e-09
B7Z4K4	YTPPTQPPISPPYQEACTLK	S10(Phospho); C17(Carbamidomethyl)	Y(1): 0.0; T(2): 0.0; T(5): 0.0; S(10): 100.0; Y(13): 0.0; T(18): 0.0	0	2.878e-09
Q9Y6D5	QSLSSADNLESDAQGHQVAAR	S4(Phospho); S5(Phospho)	S(2): 0.0; S(4): 100.0; S(5): 100.0; S(11): 0.0	0	2.9e-09
P08238	IEDVGSDEEDDSGKDK	S6(Phospho); S12(Phospho)	S(6): 100.0; S(12): 100.0	0	2.917e-09
Q4KMP7	RASAGPAPGPVVTAEGLHPSLPSPTGNSTPLGSSK	S3(Phospho)	S(3): 100.0; T(13): 0.0; S(20): 0.0; S(23): 0.0; T(25): 0.0; S(28): 0.0; T(29): 0.0; S(33): 0.0; S(34): 0.0	0	2.917e-09
Q9UQ35	AGMSSNQSISSPVLDAVPRTPSR	S11(Phospho); T20(Phospho)	S(4): 0.0; S(5): 0.0; S(8): 0.0; S(10): 0.0; S(11): 100.0; T(20): 99.7; S(22): 0.3	0	2.935e-09
B4DKA9	GSLVGLVDYPDDEEEDEEEESSPR	S22(Phospho)	S(2): 0.0; Y(9): 0.0; S(21): 0.2; S(22): 99.8	0	2.935e-09
Q14684	VFCVEEEDSESSLQK	C3(Carbamidomethyl); S9(Phospho)	S(9): 99.9; S(11): 0.1; S(12): 0.0	0	2.945e-09
Q96GY3	ERECSPSSPLPPLPEDEEGSEVTNSK	C4(Carbamidomethyl); S8(Phospho)	S(5): 0.4; S(7): 5.8; S(8): 93.8; S(20): 0.0; T(23): 0.0; S(25): 0.0	0	2.947e-09
Q08211	AENNSEVGASGYGVPGPTWDR	S5(Phospho)	S(5): 100.0; S(10): 0.0; Y(12): 0.0; T(18): 0.0	0	2.948e-09
Q12982	KGSITEYTAAEEK	S3(Phospho)	S(3): 100.0; T(5): 0.0; Y(7): 0.0; T(8): 0.0	0	2.948e-09
Q86VQ1	GSQHSPTRPPVAAAAASLGSLPGPGAAR	S5(Phospho)	S(2): 0.1; S(5): 49.9; T(7): 49.9; S(17): 0.0; S(20): 0.0	0	2.958e-09
Q75N11	SAYQEYDSDSDVPEELKR	S8(Phospho)	S(1): 0.0; Y(3): 0.0; Y(6): 0.0; S(8): 96.8; S(10): 3.2	0	2.962e-09
Q96T58	VVAPVESHVPESNQAQGESPAANEGTTVQHPEAPQEEK	S19(Phospho)	S(7): 0.0; S(12): 0.0; S(19): 99.9; T(26): 0.1; T(27): 0.0	0	2.975e-09
Q9UKJ3	GSEGDCSPEDKNSVTAK	C6(Carbamidomethyl); S7(Phospho)	S(2): 0.0; S(7): 100.0; S(13): 0.0; T(15): 0.0	0	2.98e-09
Q9Y4F5	QESFTKEPASGPPAPGKPPHISSHPLLQDLAATR	S3(Phospho)	S(3): 99.4; T(5): 0.6; S(10): 0.0; S(22): 0.0; S(23): 0.0; T(33): 0.0	0	2.98e-09
A4LAA3	RPTETNPVTSNSDEECNETVKEK	S12(Phospho); C16(Carbamidomethyl)	T(3): 0.0; T(5): 0.0; T(9): 0.0; S(10): 0.0; S(12): 100.0; T(19): 0.0	0	3e-09
B5BUB5	FASDDEHDEHDENGATGPVKR	S3(Phospho)	S(3): 100.0; T(16): 0.0	0	3.013e-09
B4DHL7	VERLSSGPEQITLEASSTEGHPGAPSPQHTDQTEAFQK	S5(Phospho)	S(5): 92.3; S(6): 7.7; T(12): 0.0; S(16): 0.0; S(17): 0.0; T(18): 0.0; S(26): 0.0; T(30): 0.0; T(33): 0.0	0	3.013e-09
P12270	TDGFAEAIHSPQVAGVPR	S10(Phospho)	T(1): 0.0; S(10): 100.0	0	3.016e-09
H7C4P8	QASDTEEDDITDNQK	S3(Phospho)	S(3): 100.0; T(5): 0.0; T(11): 0.0	0	3.022e-09
Q92508	DPGLEPGPDSPGGSSPPR	S10(Phospho)	S(10): 100.0; S(14): 0.0; S(15): 0.0	0	3.035e-09
C9K0P9	TGGIGDSRPPSFHPHAGGGSQENLDNDTETDSLVSAQR	S7(Phospho)	T(1): 0.7; S(7): 91.4; S(11): 7.9; S(20): 0.0; T(28): 0.0; T(30): 0.0; S(32): 0.0; S(35): 0.0	0	3.052e-09
Q96FS1	TVQPVAMGPDGLPVDASSVSNNYIQTLGR	T26(Phospho)	T(1): 0.0; S(17): 0.0; S(18): 0.0; S(20): 0.0; Y(23): 0.0; T(26): 100.0	0	3.054e-09
A0A087WU18	AGDTSDQEGHSLEEK	S5(Phospho)	T(4): 0.0; S(5): 100.0; S(11): 0.0	0	3.063e-09
Q15699	LERTSPCQDSSVNYGITK	S5(Phospho); C7(Carbamidomethyl)	T(4): 3.7; S(5): 96.3; S(10): 0.0; S(11): 0.0; Y(14): 0.0; T(17): 0.0	0	3.066e-09
Q8N556	KKPSTDEQTSSAEEDVPTCGYLNVLSNSR	S10(Phospho); S11(Phospho); C19(Carbamidomethyl)	S(4): 27.1; T(5): 27.1; T(9): 27.1; S(10): 27.1; S(11): 91.4; T(18): 0.0; Y(21): 0.0; S(26): 0.0; S(28): 0.0	0	3.084e-09
Q9UQ35	TPAALAALSLTGSGTPPTAANYPSSSR	T15(Phospho)	T(1): 0.0; S(9): 0.0; T(11): 0.0; S(13): 0.0; T(15): 100.0; T(18): 0.0; Y(22): 0.0; S(24): 0.0; S(25): 0.0; S(26): 0.0	0	3.084e-09
A0A087WZZ5	SSLGQSASETEEDTVSVSK	S6(Phospho); S8(Phospho)	S(1): 0.0; S(2): 0.0; S(6): 100.0; S(8): 100.0; T(10): 0.0; T(14): 0.0; S(16): 0.0; S(18): 0.0	0	3.085e-09
Q9Y2W1	WAHDKFSGEEGEIEDDESGTENR	S7(Phospho)	S(7): 100.0; S(18): 0.0; T(20): 0.0	0	3.109e-09
Q9H7G7	TPPDTTFPEPTCLSASPPNAPPR	C12(Carbamidomethyl); S16(Phospho)	T(1): 0.0; T(5): 0.0; T(6): 0.0; T(11): 0.0; S(14): 0.0; S(16): 100.0	0	3.119e-09
P50747	RGSASGSEPAGDSDR	S3(Phospho)	S(3): 100.0; S(5): 0.0; S(7): 0.0; S(13): 0.0	0	3.137e-09
Q9BVV8	RYGLLANTEDPTEMASLDSDEETVFESR	S16(Phospho); S19(Phospho)	Y(2): 0.0; T(8): 0.0; T(12): 0.0; S(16): 100.0; S(19): 100.0; T(23): 0.0; S(27): 0.0	0	3.162e-09
Q86WR7	KQDAETPPPPDPPAPETLLAPPPLPSTPDPPRR	T6(Phospho); T27(Phospho)	T(6): 100.0; T(17): 0.0; S(26): 50.0; T(27): 50.0	0	3.172e-09
Q6PKG0	KNTFTAWSDEESDYEIDDRDVNK	S8(Phospho); S12(Phospho)	T(3): 0.0; T(5): 0.0; S(8): 100.0; S(12): 100.0; Y(14): 0.0	0	3.18e-09
P23497	RFSSSDFSDLSNGEELQETCSSSLR	S3(Phospho); S4(Phospho); C20(Carbamidomethyl)	S(3): 99.6; S(4): 50.2; S(5): 50.2; S(8): 0.0; S(11): 0.0; T(19): 0.0; S(21): 0.0; S(22): 0.0; S(23): 0.0	0	3.224e-09
A8KAH7	RVSVCAETYNPDEEEEDTDPR	S3(Phospho); C5(Carbamidomethyl)	S(3): 100.0; T(8): 0.0; Y(9): 0.0; T(18): 0.0	0	3.229e-09
Q15751	HESEEKGDVEQKPESESALDMR	S3(Phospho)	S(3): 100.0; S(15): 0.0; S(17): 0.0	0	3.231e-09
Q9NYF8	SSATSGDIWPGLSAYDNSPR	S18(Phospho)	S(1): 0.0; S(2): 0.0; T(4): 0.0; S(5): 0.0; S(13): 0.0; Y(15): 0.0; S(18): 100.0	0	3.235e-09
Q09666	SNSFSDEREFSGPSTPTGTLEFEGGEVSLEGGK	S1(Phospho)	S(1): 92.6; S(3): 7.3; S(5): 0.1; S(11): 0.0; S(14): 0.0; T(15): 0.0; T(17): 0.0; T(19): 0.0; S(28): 0.0	0	3.244e-09
Q8TEK3	VAGPADAPMDSGAEEEK	S11(Phospho)	S(11): 100.0	0	3.248e-09
B0AZQ4	GSGSQSSVPSVDQFTGVGIR	S2(Phospho)	S(2): 96.0; S(4): 4.0; S(6): 0.0; S(7): 0.0; S(10): 0.0; T(15): 0.0	0	3.276e-09
Q7KZ85	MSDDEDDDEEEYGKEEHEK	S2(Phospho)	S(2): 100.0; Y(12): 0.0	0	3.289e-09
P85037	AASEQQADTSGGDSPKDESKPPFSYAQLIVQAISSAQDR	S10(Phospho); S14(Phospho)	S(3): 0.0; T(9): 47.5; S(10): 47.5; S(14): 97.8; S(19): 7.2; S(24): 0.0; Y(25): 0.0; S(34): 0.0; S(35): 0.0	0	3.293e-09
Q15645	QALPCVAESPTVHVEVHQR	C5(Carbamidomethyl); S9(Phospho)	S(9): 100.0; T(11): 0.0	0	3.297e-09
B4DP61	RGTGQSDDSDIWDDTALIK	T3(Phospho); S6(Phospho); S9(Phospho)	T(3): 100.0; S(6): 100.0; S(9): 100.0; T(15): 0.0	0	3.319e-09
Q6PII6	SVSEINSDDELSGK	S7(Phospho)	S(1): 0.0; S(3): 0.0; S(7): 100.0; S(12): 0.0	0	3.319e-09
J3KP58	QLSSSSGNTDTQADEDER	S4(Phospho); S6(Phospho)	S(3): 89.2; S(4): 5.8; S(5): 5.8; S(6): 93.6; T(9): 5.7; T(11): 0.0	0	3.32e-09
Q0JRZ9	LSGINEIPRPFSPPVTSNTSPPPAAPLAR	S17(Phospho)	S(2): 0.0; S(12): 0.0; T(16): 6.3; S(17): 86.9; T(19): 6.3; S(20): 0.5	0	3.356e-09
A0A087WZZ5	IEEAMDGSETPQLFTVLPEK	T10(Phospho)	S(8): 0.0; T(10): 100.0; T(15): 0.0	0	3.381e-09
A0A024R6P8	DGSTEDTASSLCGEEDTEDEELEAAASHLNK	C12(Carbamidomethyl); T17(Phospho)	S(3): 0.0; T(4): 0.0; T(7): 0.0; S(9): 0.0; S(10): 0.0; T(17): 100.0; S(27): 0.0	0	3.382e-09
B7Z8L3	AQSSPASATFPVSVQEPPTKPR	S3(Phospho)	S(3): 95.1; S(4): 4.9; S(7): 0.0; T(9): 0.0; S(13): 0.0; T(19): 0.0	0	3.395e-09
A8K6X9	KGGEFDEFVNDDTDDDLPISK	T13(Phospho)	T(13): 100.0; S(20): 0.0	0	3.399e-09
A0A024R0X0	QLSLEGSGLGVEDLK	S3(Phospho)	S(3): 100.0; S(7): 0.0	0	3.407e-09
Q27J81	GARPPAAGPGGDEDEDEEDTAPESALDTSLDK	T28(Phospho); S29(Phospho)	T(20): 0.0; S(24): 0.0; T(28): 100.0; S(29): 100.0	0	3.415e-09
Q9Y5B6	LVREDENDASDDEDDDEKR	S10(Phospho)	S(10): 100.0	0	3.45e-09
H3BU99	DKDQPPSPSPPPQSEALSSTSR	S9(Phospho)	S(7): 0.0; S(9): 100.0; S(14): 0.0; S(18): 0.0; S(19): 0.0; T(20): 0.0; S(21): 0.0	0	3.456e-09
G5E953	TRSYDNLTTACDNTVPLASR	T1(Phospho); C11(Carbamidomethyl)	T(1): 91.8; S(3): 4.1; Y(4): 4.1; T(8): 0.0; T(9): 0.0; T(14): 0.0; S(19): 0.0	0	3.459e-09
Q8N1G4	EEGSLSDTEADAVSGQLPDPTTNPSAGK	S6(Phospho)	S(4): 5.4; S(6): 89.3; T(8): 5.4; S(14): 0.0; T(21): 0.0; T(22): 0.0; S(25): 0.0	0	3.464e-09
Q59FS7	SPGKAEAESDALPDDTVIESEALPSDIAAEAR	S1(Phospho)	S(1): 100.0; S(9): 0.0; T(16): 0.0; S(20): 0.0; S(25): 0.0	0	3.483e-09
Q8TEQ0	GHSESPEKPLEGNTCLSQMHSWAPLK	S3(Phospho); C15(Carbamidomethyl)	S(3): 99.6; S(5): 0.4; T(14): 0.0; S(17): 0.0; S(21): 0.0	0	3.497e-09
Q0MQR4	LENVSQLSLDKSPTEK	S12(Phospho)	S(5): 0.0; S(8): 0.0; S(12): 100.0; T(14): 0.0	0	3.528e-09
O75420	ALSGGGSVASPPPSPAMPK	S10(Phospho)	S(3): 0.0; S(7): 0.0; S(10): 100.0; S(14): 0.0	0	3.535e-09
B3KWI5	ESCSSPSTVGSSLTTR	C3(Carbamidomethyl); S5(Phospho)	S(2): 0.0; S(4): 0.0; S(5): 100.0; S(7): 0.0; T(8): 0.0; S(11): 0.0; S(12): 0.0; T(14): 0.0; T(15): 0.0	0	3.537e-09
O75475	QVETEEAGVVTTATASVNLKVSPK	S22(Phospho)	T(4): 0.0; T(11): 0.0; T(12): 0.0; T(14): 0.0; S(16): 0.0; S(22): 100.0	0	3.538e-09
Q5JS72	TQSSSCEDLPSTTQPK	S5(Phospho); C6(Carbamidomethyl)	T(1): 0.0; S(3): 0.0; S(4): 0.0; S(5): 100.0; S(11): 0.0; T(12): 0.0; T(13): 0.0	0	3.543e-09
Q9UQ35	SSTPPGESYFGVSSLQLK	T3(Phospho)	S(1): 0.0; S(2): 0.0; T(3): 100.0; S(8): 0.0; Y(9): 0.0; S(13): 0.0; S(14): 0.0	0	3.548e-09
A8K8N5	SYSSPDITQAIQEEEK	S3(Phospho)	S(1): 0.0; Y(2): 0.0; S(3): 99.9; S(4): 0.1; T(8): 0.0	0	3.561e-09
Q6AHX7	EGNTTEDDFPSSPGNGNK	S12(Phospho)	T(4): 0.0; T(5): 0.0; S(11): 0.2; S(12): 99.8	0	3.586e-09
B4DV82	VNNGNTAPEDSSPAK	S12(Phospho)	T(6): 0.0; S(11): 50.0; S(12): 50.0	0	3.589e-09
V9GYZ0	ASATSVSSAGEQAAGDPEGR	S5(Phospho)	S(2): 0.0; T(4): 0.0; S(5): 100.0; S(7): 0.0; S(8): 0.0	0	3.6e-09
O95400	GKHSLDSDEEEDDDDGGSSK	S7(Phospho)	S(4): 0.0; S(7): 100.0; S(18): 0.0; S(19): 0.0	0	3.601e-09
Q9NWH9	ISSKSPGHMVILDQTK	S3(Phospho)	S(2): 0.0; S(3): 0.1; S(5): 99.9; T(15): 0.0	0	3.601e-09
P18583	CVSVQTDPTDEIPTKK	C1(Carbamidomethyl); S3(Phospho)	S(3): 100.0; T(6): 0.0; T(9): 0.0; T(14): 0.0	0	3.605e-09
H3BQP2	STSATDTHHVEMAR	S1(Phospho)	S(1): 50.0; T(2): 50.0; S(3): 0.0; T(5): 0.0; T(7): 0.0	0	3.609e-09
A0A024R869	SVSKESVASMGADSGDDFASDGSSSR	S9(Phospho); S14(Phospho)	S(1): 0.5; S(3): 99.5; S(6): 0.0; S(9): 0.0; S(14): 100.0; S(20): 0.0; S(23): 0.0; S(24): 0.0; S(25): 0.0	0	3.613e-09
Q9NYF8	AEGEWEDQEALDYFSDKESGK	S15(Phospho)	Y(13): 0.0; S(15): 100.0; S(19): 0.0	0	3.622e-09
Q8IWX8	SRSPTPPSSAGLGSNSAPPIPDSR	S1(Phospho); S3(Phospho); T5(Phospho)	S(1): 100.0; S(3): 100.0; T(5): 100.0; S(8): 0.0; S(9): 0.0; S(14): 0.0; S(16): 0.0; S(23): 0.0	0	3.624e-09
A8MXP9	DTSENADGQSDENKDDYTIPDEYR	S10(Phospho)	T(2): 0.0; S(3): 0.0; S(10): 100.0; Y(17): 0.0; T(18): 0.0; Y(23): 0.0	0	3.656e-09
F8VWH9	TRKSPSSDSWTCADTSTER	S4(Phospho); C12(Carbamidomethyl)	T(1): 0.0; S(4): 99.7; S(6): 0.2; S(7): 0.0; S(9): 0.0; T(11): 0.0; T(15): 0.0; S(16): 0.0; T(17): 0.0	0	3.656e-09
C9JXI1	VTLYNTDQDGSDSPR	S13(Phospho)	T(2): 0.0; Y(4): 0.0; T(6): 0.0; S(11): 0.0; S(13): 100.0	0	3.665e-09
Q12872	SGVSSDNEDDDDEEDGNYLHPSLFASK	S5(Phospho)	S(1): 0.0; S(4): 5.4; S(5): 94.6; Y(18): 0.0; S(22): 0.0; S(26): 0.0	0	3.669e-09
K7EJ05	SPSDLLDASAVSATSR	S3(Phospho)	S(1): 0.0; S(3): 100.0; S(9): 0.0; S(12): 0.0; T(14): 0.0; S(15): 0.0	0	3.675e-09
H7C2Y0	IYHLPDAESDEDEDFKEQTR	S9(Phospho)	Y(2): 0.0; S(9): 100.0; T(19): 0.0	0	3.681e-09
Q8WXG6	KRSPTESVNTPVGK	S3(Phospho)	S(3): 96.4; T(5): 3.6; S(7): 0.0; T(10): 0.0	0	3.688e-09
Q9BVJ6	DYLLSESEDEGDNDGER	S7(Phospho)	Y(2): 0.0; S(5): 0.0; S(7): 100.0	0	3.692e-09
F8WBJ7	GESAPTLSTSPSPSSPSPTSPSPTLGR	S22(Phospho)	S(3): 0.0; T(6): 0.0; S(8): 0.0; T(9): 0.0; S(10): 0.0; S(12): 0.0; S(14): 0.0; S(15): 0.0; S(17): 0.0; T(19): 0.0; S(20): 0.0; S(22): 93.8; T(24): 6.2	0	3.715e-09
B7Z2F6	TDCEPVGLEPAVEQSSAASELAEASSEELAEAPTEAPSPEAR	C3(Carbamidomethyl); S38(Phospho)	T(1): 0.0; S(15): 0.0; S(16): 0.0; S(19): 0.0; S(25): 0.0; S(26): 0.0; T(34): 0.0; S(38): 100.0	0	3.723e-09
Q13428	TQPSSGVDSAVGTLPATSPQSTSVQAK	S18(Phospho)	T(1): 0.0; S(4): 0.0; S(5): 0.0; S(9): 0.0; T(13): 0.0; T(17): 0.2; S(18): 49.8; S(21): 49.8; T(22): 0.2; S(23): 0.0	0	3.727e-09
E9PMS6	TSTTGVATTQSPTPR	S11(Phospho)	T(1): 0.0; S(2): 0.0; T(3): 0.0; T(4): 0.0; T(8): 0.0; T(9): 0.0; S(11): 99.9; T(13): 0.1	0	3.767e-09
Q03252	ATSSSSGSLSATGR	S8(Phospho)	T(2): 0.0; S(3): 0.0; S(4): 0.0; S(5): 0.0; S(6): 0.0; S(8): 96.3; S(10): 3.7; T(12): 0.0	0	3.771e-09
P33981	VPVNLLNSPDCDVK	S8(Phospho); C11(Carbamidomethyl)	S(8): 100.0	0	3.776e-09
A0A059XAM1	SQIDVALSQDSTYQGER	S8(Phospho); S11(Phospho)	S(1): 0.0; S(8): 100.0; S(11): 93.0; T(12): 3.5; Y(13): 3.5	0	3.791e-09
E5RFM9	HPRPTETASDSEGNFETPEAETPIR	S9(Phospho)	T(5): 0.0; T(7): 4.6; S(9): 95.4; S(11): 0.0; T(17): 0.0; T(22): 0.0	0	3.81e-09
Q32MZ4	KALDSNSLENDDLSAPGREPGHFNPESR	S5(Phospho)	S(5): 96.0; S(7): 4.0; S(14): 0.0; S(27): 0.0	0	3.81e-09
Q9NYF8	FNDSEGDDTEETEDYR	S4(Phospho); T9(Phospho)	S(4): 100.0; T(9): 100.0; T(12): 0.0; Y(15): 0.0	0	3.82e-09
A8K5A5	APYQENDGYCPDLELSDSEAESDGNKEK	C10(Carbamidomethyl); S16(Phospho); S18(Phospho)	Y(3): 0.0; Y(9): 0.0; S(16): 100.0; S(18): 100.0; S(22): 0.0	0	3.86e-09
B2R8U0	ESSEPTGSPAPVIQHSSATAPSNGLSVR	T6(Phospho)	S(2): 0.0; S(3): 0.0; T(6): 50.0; S(8): 50.0; S(16): 0.0; S(17): 0.0; T(19): 0.0; S(22): 0.0; S(26): 0.0	0	3.871e-09
B4E2A4	KSVSSPTSSNTPTPTK	S2(Phospho)	S(2): 100.0; S(4): 0.0; S(5): 0.0; T(7): 0.0; S(8): 0.0; S(9): 0.0; T(11): 0.0; T(13): 0.0; T(15): 0.0	0	3.885e-09
B4DPK7	SASEFQELDSPDDTMGTIK	S10(Phospho)	S(1): 0.0; S(3): 0.0; S(10): 100.0; T(14): 0.0; T(17): 0.0	0	3.889e-09
Q9NWH9	DGQDAIAQSPEKESKDYEMNANHK	S9(Phospho)	S(9): 100.0; S(14): 0.0; Y(17): 0.0	0	3.941e-09
Q12906	GSSEQAESDNMDVPPEDDSK	S8(Phospho)	S(2): 0.0; S(3): 0.0; S(8): 100.0; S(19): 0.0	0	3.965e-09
P22059	MLAESDESGDEESVSQTDKTELQNTLR	S8(Phospho)	S(5): 0.0; S(8): 100.0; S(13): 0.0; S(15): 0.0; T(17): 0.0; T(20): 0.0; T(25): 0.0	0	3.974e-09
Q9C0C9	NMTVEQLLTGSPTSPTVEPEKPTR	S14(Phospho)	T(3): 0.0; T(9): 0.0; S(11): 0.0; T(13): 0.2; S(14): 95.0; T(16): 4.8; T(23): 0.0	0	3.995e-09
A8K3R2	IGDEYAEDSSDEEDIR	S9(Phospho); S10(Phospho)	Y(5): 0.0; S(9): 100.0; S(10): 100.0	0	4.005e-09
B4DM10	KKPCSETSQIEGSPTEFLEEK	C4(Carbamidomethyl); S13(Phospho)	S(5): 0.0; T(7): 0.0; S(8): 0.0; S(13): 100.0; T(15): 0.0	0	4.012e-09
C9JA69	TADGRVSPAGGTLDDKPK	S7(Phospho)	T(1): 0.0; S(7): 100.0; T(12): 0.0	0	4.055e-09
Q9ULM3	QPGQVIGATTPSTGSPTNK	S15(Phospho)	T(9): 0.0; T(10): 0.0; S(12): 0.0; T(13): 0.0; S(15): 96.0; T(17): 4.0	0	4.057e-09
B4DNC7	AHGLSLIPSTGLCSPDLVNR	C13(Carbamidomethyl); S14(Phospho)	S(5): 0.0; S(9): 0.0; T(10): 0.0; S(14): 100.0	0	4.059e-09
Q9H8M2	EHCDTEGEADDFDPGK	C3(Carbamidomethyl); T5(Phospho)	T(5): 100.0	0	4.061e-09
A6NDA1	GGDDYSEDEGDSSVSR	S6(Phospho)	Y(5): 0.0; S(6): 100.0; S(12): 0.0; S(13): 0.0; S(15): 0.0	0	4.065e-09
Q8WYH5	YTGEEDGAGGHSPAPPQTEECLR	S12(Phospho); C21(Carbamidomethyl)	Y(1): 0.0; T(2): 0.0; S(12): 100.0; T(18): 0.0	0	4.101e-09
B3KP49	SQHHSSTSNQETSDSEMEMEAEHYPNGVLGSMSTR	S13(Phospho)	S(1): 0.0; S(5): 0.0; S(6): 0.0; T(7): 0.0; S(8): 0.0; T(12): 1.0; S(13): 98.1; S(15): 1.0; Y(24): 0.0; S(31): 0.0; S(33): 0.0; T(34): 0.0	0	4.13e-09
P18858	TIQEVLEEQSEDEDREAK	S10(Phospho)	T(1): 0.0; S(10): 100.0	0	4.142e-09
P13051	KAPAGQEEPGTPPSSPLSAEQLDR	T11(Phospho)	T(11): 100.0; S(14): 0.0; S(15): 0.0; S(18): 0.0	0	4.156e-09
Q8WWM7	LQPSSSPENSLDPFPPR	S6(Phospho)	S(4): 0.0; S(5): 0.0; S(6): 100.0; S(10): 0.0	0	4.166e-09
Q13546	MQSLQLDCVAVPSSR	S3(Phospho); C8(Carbamidomethyl)	S(3): 100.0; S(13): 0.0; S(14): 0.0	0	4.189e-09
C9J8F8	KPEEMPTACPGHSPR	C9(Carbamidomethyl); S13(Phospho)	T(7): 0.0; S(13): 100.0	0	4.222e-09
Q53FR4	PTTQQSPQDEQEKLLDEAIQAVK	S6(Phospho)	T(2): 0.3; T(3): 5.1; S(6): 94.6	0	4.242e-09
Q9Y5B6	EDENDASDDEDDDEK	S7(Phospho)	S(7): 100.0	0	4.266e-09
B3KX07	RSNSAPLIHGLSDTSPVFQAEAPSAR	S4(Phospho)	S(2): 5.8; S(4): 94.2; S(12): 0.0; T(14): 0.0; S(15): 0.0; S(24): 0.0	0	4.29e-09
A0A087WUT6	KWDGSEEDEDNSKK	S5(Phospho)	S(5): 100.0; S(12): 0.0	0	4.323e-09
B3KN82	HIKEEPLSEEEPCTSTAIASPEK	C13(Carbamidomethyl); S20(Phospho)	S(8): 0.0; T(14): 0.0; S(15): 0.0; T(16): 0.0; S(20): 100.0	0	4.334e-09
O95218	YNLDASEEEDSNKKK	S6(Phospho)	Y(1): 0.0; S(6): 100.0; S(11): 0.0	0	4.334e-09
Q06587	VRRPIPGSDQTTTMSGGEGEPGEGEGDGEDVSSDSAPDSAPGPAPK	S32(Phospho)	S(8): 0.0; T(11): 0.0; T(12): 0.0; T(13): 0.0; S(15): 0.0; S(32): 89.2; S(33): 9.7; S(35): 1.1; S(39): 0.0	0	4.349e-09
P35269	GNSRPGTPSAEGGSTSSTLR	T7(Phospho)	S(3): 0.0; T(7): 100.0; S(9): 0.0; S(14): 0.0; T(15): 0.0; S(16): 0.0; S(17): 0.0; T(18): 0.0	0	4.379e-09
A0A087WUT6	VEMYSGSDDDDDFNKLPK	S5(Phospho)	Y(4): 0.0; S(5): 100.0; S(7): 0.0	0	4.425e-09
P19338	AAAAAPASEDEDDEDDEDDEDDDDDEEDDSEEEAMETTPAK	S30(Phospho)	S(8): 0.0; S(30): 100.0; T(37): 0.0; T(38): 0.0	0	4.432e-09
B4DN01	SMGSQEDDSGNKPSSYS	S17(Phospho)	S(1): 0.0; S(4): 0.0; S(9): 0.0; S(14): 0.0; S(15): 0.0; Y(16): 0.0; S(17): 100.0	0	4.434e-09
Q99856	EGPGEEHFEDMASDEDMKPK	S13(Phospho)	S(13): 100.0	0	4.44e-09
P16383	NEETSEESQEDEKQDTWEQQQMR	S5(Phospho)	T(4): 0.0; S(5): 0.0; S(8): 100.0; T(16): 0.0	0	4.482e-09
J3KNG9	TSPSSPAPLPHQEATPR	S5(Phospho)	T(1): 0.0; S(2): 0.0; S(4): 0.0; S(5): 100.0; T(15): 0.0	0	4.485e-09
P23497	LNECISPVANEMNHLPAHSHDLQR	C4(Carbamidomethyl); S6(Phospho)	S(6): 100.0; S(19): 0.0	0	4.487e-09
Q08945	SKEFVSSDESSSGENK	S6(Phospho)	S(1): 0.0; S(6): 97.2; S(7): 2.8; S(10): 0.0; S(11): 0.0; S(12): 0.0	0	4.491e-09
Q68EM7	SPSPPTQHTGQPPGQPSAPSQLSAPR	S3(Phospho)	S(1): 25.0; S(3): 25.0; T(6): 25.0; T(9): 25.0; S(17): 0.0; S(20): 0.0; S(23): 0.0	0	4.51e-09
G3V1B8	IYCVACQELDSDVDKDNPALNAQAALSQAR	C3(Carbamidomethyl); C6(Carbamidomethyl); S11(Phospho)	Y(2): 0.0; S(11): 100.0; S(27): 0.0	0	4.512e-09
H0YKH0	ESSANNSVSPSESLR	S9(Phospho)	S(2): 0.0; S(3): 0.0; S(7): 0.0; S(9): 100.0; S(11): 0.0; S(13): 0.0	0	4.522e-09
P26038	TAMSTPHVAEPAENEQDEQDENGAEASADLR	S4(Phospho)	T(1): 8.0; S(4): 84.0; T(5): 8.0; S(27): 0.0	0	4.533e-09
H3BS86	LGAGGGSPEKSPSAQELK	S7(Phospho); S11(Phospho)	S(7): 100.0; S(11): 100.0; S(13): 0.0	0	4.534e-09
H0Y4E0	QLAEEEPMDTDQGNSMLSAIQSEVAK	S15(Phospho)	T(10): 0.0; S(15): 100.0; S(18): 0.0; S(22): 0.0	0	4.54e-09
Q09666	ISMQDVDLSLGSPK	S12(Phospho)	S(2): 0.0; S(9): 0.0; S(12): 100.0	0	4.548e-09
A0A024R8V0	SFEVEEVETPNSTPPR	S1(Phospho)	S(1): 100.0; T(9): 0.0; S(12): 0.0; T(13): 0.0	0	4.607e-09
Q86U86	GEADDEDDDEDGQDNQGTVTEGSSPAYLK	S24(Phospho)	T(18): 0.0; T(20): 0.0; S(23): 0.3; S(24): 99.5; Y(27): 0.3	0	4.623e-09
Q96T23	GRSTDEYSEADEEEEEEEGKPSR	S3(Phospho); T4(Phospho); S8(Phospho)	S(3): 100.0; T(4): 100.0; Y(7): 0.3; S(8): 99.7; S(22): 0.0	0	4.664e-09
P41236	IDEPSTPYHSMMGDDEDACSDTEATEAMAPDILAR	C19(Carbamidomethyl); T22(Phospho)	S(5): 0.0; T(6): 0.0; Y(8): 0.0; S(10): 0.0; S(20): 50.0; T(22): 50.0; T(25): 0.0	0	4.672e-09
P49327	ADEASELACPTPKEDGLAQQQTQLNLR	C9(Carbamidomethyl); T11(Phospho)	S(5): 0.0; T(11): 100.0; T(22): 0.0	0	4.721e-09
Q9H307	QQDSQPEEVMDVLEMVENVK	S4(Phospho)	S(4): 100.0	0	4.739e-09
P35579	KGAGDGSDEEVDGKADGAEAKPAE	S7(Phospho)	S(7): 100.0	0	4.753e-09
Q92766	QVAGDAPVEQATAETASPVHR	S17(Phospho)	T(12): 0.0; T(15): 3.5; S(17): 96.5	0	4.768e-09
Q9C0C2	YSSQDADEQDWEFQKR	S3(Phospho)	Y(1): 0.0; S(2): 0.0; S(3): 100.0	0	4.816e-09
Q96ST2	MDSDEDEKEGEEEK	S3(Phospho)	S(3): 100.0	0	4.836e-09
Q96FW1	QEPLGSDSEGVNCLAYDEAIMAQQDR	S6(Phospho); C13(Carbamidomethyl)	S(6): 95.4; S(8): 4.6; Y(16): 0.0	0	4.858e-09
H0YEY1	SWCSEATSGQELADLESEHDER	S1(Phospho); C3(Carbamidomethyl)	S(1): 100.0; S(4): 0.0; T(7): 0.0; S(8): 0.0; S(17): 0.0	0	4.873e-09
B2RAL9	SNISPNFNFMGQLLDFER	S4(Phospho)	S(1): 0.0; S(4): 100.0	0	4.893e-09
Q9NR09	LEGDSDDLLEDSDSEEHSR	S12(Phospho)	S(5): 0.0; S(12): 99.9; S(14): 0.1; S(18): 0.0	0	4.897e-09
Q9UQ35	TPAAAAAMNLASPR	S12(Phospho)	T(1): 0.0; S(12): 100.0	0	4.902e-09
P16383	AADSSDSDGAEESPAEPGAPR	S5(Phospho); S7(Phospho)	S(4): 0.4; S(5): 99.6; S(7): 100.0; S(13): 0.0	0	4.916e-09
A8K940	CGEASPPSAACGSPASQLVATPSLELGPIPAGEEK	C1(Carbamidomethyl); S5(Phospho); C11(Carbamidomethyl)	S(5): 100.0; S(8): 0.0; S(13): 0.0; S(16): 0.0; T(21): 0.0; S(23): 0.0	0	4.934e-09
A0A087X1L5	NLSNEEMIQAADELEEMKR	S3(Phospho)	S(3): 100.0	0	4.944e-09
Q5QNY5	AKPSPAPPSTTTAPDASGPQK	S4(Phospho)	S(4): 100.0; S(9): 0.0; T(10): 0.0; T(11): 0.0; T(12): 0.0; S(17): 0.0	0	4.958e-09
P19838	QMGYTEAIEVIQAASSPVK	S16(Phospho)	Y(4): 0.0; T(5): 0.0; S(15): 0.2; S(16): 99.8	0	4.976e-09
P13051	HAPSPEPAVQGTGVAGVPEESGDAAAIPAK	S4(Phospho)	S(4): 100.0; T(12): 0.0; S(21): 0.0	0	5.014e-09
P54259	SEEISESESEETNAPK	S5(Phospho)	S(1): 0.0; S(5): 100.0; S(7): 0.0; S(9): 0.0; T(12): 0.0	0	5.032e-09
Q9UBB9	TTQSMQDFPVVDSEEEAEEEFQK	S13(Phospho)	T(1): 0.0; T(2): 0.0; S(4): 0.0; S(13): 100.0	0	5.035e-09
P22466	LLDLPAAASSEDIERS	S9(Phospho)	S(9): 99.9; S(10): 0.1; S(16): 0.0	0	5.041e-09
Q9UQ35	GRGPSPEGSSSTESSPEHPPK	S5(Phospho)	S(5): 100.0; S(9): 0.0; S(10): 0.0; S(11): 0.0; T(12): 0.0; S(14): 0.0; S(15): 0.0	0	5.096e-09
B3KMY8	SLSFEMQQDELIEKPMSPMQYAR	S3(Phospho)	S(1): 0.3; S(3): 99.7; S(17): 0.0; Y(21): 0.0	0	5.101e-09
Q13428	AGKPEEDSESSSEESSDSEEETPAAK	S18(Phospho)	S(8): 0.0; S(10): 0.0; S(11): 0.0; S(12): 0.0; S(15): 0.0; S(16): 0.0; S(18): 95.9; T(22): 4.1	0	5.116e-09
Q96T88	ERDSELSDTDSGCCLGQSESDK	S7(Phospho); S11(Phospho); C13(Carbamidomethyl); C14(Carbamidomethyl)	S(4): 0.4; S(7): 99.6; T(9): 0.0; S(11): 100.0; S(18): 0.0; S(20): 0.0	0	5.12e-09
P27448	GIAPASPMLGNASNPNK	S6(Phospho)	S(6): 100.0; S(13): 0.0	0	5.14e-09
Q9H6F5	LGGLRPESPESLTSVSR	S8(Phospho)	S(8): 100.0; S(11): 0.0; T(13): 0.0; S(14): 0.0; S(16): 0.0	0	5.145e-09
A0A087WU64	SIGASPNPFSVHTATAVPSGK	S1(Phospho)	S(1): 100.0; S(5): 0.0; S(10): 0.0; T(13): 0.0; T(15): 0.0; S(19): 0.0	0	5.198e-09
Q9BTC0	SKHDSSAPDPAPDSADEVMPEAVPEVASEPGLESASHPNVDR	S14(Phospho)	S(1): 0.0; S(5): 1.4; S(6): 1.4; S(14): 97.1; S(28): 0.0; S(34): 0.0; S(36): 0.0	0	5.207e-09
Q12789	RASWASENGETDAEGTQMTPAK	S3(Phospho); S6(Phospho)	S(3): 100.0; S(6): 100.0; T(11): 0.0; T(16): 0.0; T(19): 0.0	0	5.23e-09
Q9Y232	WKGYDSEDDTWEPEQHLVNCEEYIHDFNR	S6(Phospho); C20(Carbamidomethyl)	Y(4): 88.1; S(6): 6.0; T(10): 6.0; Y(23): 0.0	0	5.234e-09
P02545	ASSHSSQTQGGGSVTK	S6(Phospho)	S(2): 0.0; S(3): 0.2; S(5): 0.2; S(6): 99.7; T(8): 0.0; S(13): 0.0; T(15): 0.0	0	5.264e-09
Q8ND56	SPTMEQAVQTASAHLPAPAAVGR	S1(Phospho)	S(1): 99.8; T(3): 0.2; T(10): 0.0; S(12): 0.0	0	5.27e-09
U3KQ48	SPVFSDEDSDLDFDISK	S1(Phospho); S5(Phospho); S9(Phospho)	S(1): 100.0; S(5): 100.0; S(9): 100.0; S(16): 0.0	0	5.282e-09
P49792	EDALDDSVSSSSVHASPLASSPVRK	S21(Phospho)	S(7): 0.0; S(9): 0.0; S(10): 0.0; S(11): 0.0; S(12): 0.0; S(16): 4.9; S(20): 0.3; S(21): 94.8	0	5.284e-09
D6RD37	LDCRSPVGLDCCNCCLDLAHR	C3(Carbamidomethyl); S5(Phospho); C11(Carbamidomethyl); C12(Carbamidomethyl); C14(Carbamidomethyl); C15(Carbamidomethyl)	S(5): 100.0	0	5.284e-09
A0A024R4A5	ALSSGGSITSPPLSPALPK	S10(Phospho); S14(Phospho)	S(3): 0.0; S(4): 0.0; S(7): 0.0; T(9): 0.0; S(10): 100.0; S(14): 100.0	0	5.302e-09
B4DVP2	CSDVSELSSSPPGPYHQEPYVCKPEER	C1(Carbamidomethyl); S8(Phospho); C22(Carbamidomethyl)	S(2): 0.0; S(5): 6.3; S(8): 86.9; S(9): 6.3; S(10): 0.5; Y(15): 0.0; Y(20): 0.0	0	5.303e-09
H7BXQ8	SAGALEEGTSEGQLCGR	S1(Phospho); C15(Carbamidomethyl)	S(1): 100.0; T(9): 0.0; S(10): 0.0	0	5.345e-09
Q7Z6E9	VTGTEGSSSTLVDYTSTSSTGGSPVRK	S23(Phospho)	T(2): 0.0; T(4): 0.0; S(7): 0.0; S(8): 0.0; S(9): 0.0; T(10): 0.0; Y(14): 0.0; T(15): 0.0; S(16): 0.0; T(17): 0.0; S(18): 0.0; S(19): 5.6; T(20): 5.6; S(23): 88.8	0	5.358e-09
Q9H4L7	KLSSSSEPYEEDEFNDDQSIKK	S3(Phospho); S4(Phospho); S5(Phospho)	S(3): 100.0; S(4): 99.5; S(5): 93.5; S(6): 7.0; Y(9): 0.0; S(19): 0.0	0	5.365e-09
B4DZC3	KAEDSDSEPEPEDNVR	S5(Phospho); S7(Phospho)	S(5): 100.0; S(7): 100.0	0	5.373e-09
B2RAX6	VQEHEDSGDSEVENEAK	S7(Phospho); S10(Phospho)	S(7): 100.0; S(10): 100.0	0	5.381e-09
Q14160	RSEACPCQPDSGSPLPAEEEKR	C5(Carbamidomethyl); C7(Carbamidomethyl); S13(Phospho)	S(2): 0.0; S(11): 0.0; S(13): 100.0	0	5.413e-09
Q59GB9	IACDEEFSDSEDEGEGGR	C3(Carbamidomethyl); S8(Phospho); S10(Phospho)	S(8): 100.0; S(10): 100.0	0	5.472e-09
B4DS13	TGSESSQTGTSTTSSR	S3(Phospho)	T(1): 0.0; S(3): 100.0; S(5): 0.0; S(6): 0.0; T(8): 0.0; T(10): 0.0; S(11): 0.0; T(12): 0.0; T(13): 0.0; S(14): 0.0; S(15): 0.0	0	5.489e-09
Q9HC52	RQDSDLVQCGVTSPSSAEATGK	C9(Carbamidomethyl); S13(Phospho)	S(4): 0.0; T(12): 0.0; S(13): 92.8; S(15): 0.0; S(16): 3.6; T(20): 3.6	0	5.514e-09
Q13136	RSSDGSLSHEEDLAK	S6(Phospho)	S(2): 0.0; S(3): 0.0; S(6): 99.9; S(8): 0.1	0	5.519e-09
Q8N1G0	SDPDGGDSPLPASGGPLTCK	S8(Phospho); C19(Carbamidomethyl)	S(1): 0.0; S(8): 100.0; S(13): 0.0; T(18): 0.0	0	5.519e-09
Q15149	RGSFDATGSGFSMTFSSSSYSSSGYGR	S3(Phospho)	S(3): 100.0; T(7): 0.0; S(9): 0.0; S(12): 0.0; T(14): 0.0; S(16): 0.0; S(17): 0.0; S(18): 0.0; S(19): 0.0; Y(20): 0.0; S(21): 0.0; S(22): 0.0; S(23): 0.0; Y(25): 0.0	0	5.56e-09
E9PMS6	ATLSSTSGLDLMSESGEGEISPQR	S21(Phospho)	T(2): 0.0; S(4): 0.0; S(5): 0.0; T(6): 0.0; S(7): 0.0; S(13): 0.0; S(15): 0.0; S(21): 100.0	0	5.592e-09
Q9ULT8	KGSSSSVCSVASSSDISLGSTK	S6(Phospho); C8(Carbamidomethyl)	S(3): 25.0; S(4): 25.0; S(5): 25.0; S(6): 25.0; S(9): 0.0; S(12): 0.0; S(13): 0.0; S(14): 0.0; S(17): 0.0; S(20): 0.0; T(21): 0.0	0	5.597e-09
A0A087X1N2	SQLDDHPESDDEENFIDANDDEDMEKFTDADKETEIVK	S9(Phospho)	S(1): 0.0; S(9): 100.0; T(28): 0.0; T(34): 0.0	0	5.609e-09
O15061	QFTQSPETEASADSFPDTK	S5(Phospho)	T(3): 0.0; S(5): 5.0; T(8): 95.0; S(11): 0.0; S(14): 0.0; T(18): 0.0	0	5.614e-09
O75475	TGVTSTSDSEEEGDDQEGEKK	S7(Phospho); S9(Phospho)	T(1): 0.0; T(4): 0.0; S(5): 0.0; T(6): 0.0; S(7): 100.0; S(9): 100.0	0	5.615e-09
Q8TC07	KDSSSVVEWTQAPK	S3(Phospho)	S(3): 100.0; S(4): 0.0; S(5): 0.0; T(10): 0.0	0	5.637e-09
B4E106	KESKEEETSIDVAGKPNEVTK	S3(Phospho)	S(3): 100.0; T(8): 0.0; S(9): 0.0; T(20): 0.0	0	5.649e-09
Q9H1E3	TPSPKEEDEEPESPPEKK	S13(Phospho)	T(1): 0.0; S(3): 0.0; S(13): 100.0	0	5.674e-09
Q6PL18	KPNIFYSGPASPARPR	S11(Phospho)	Y(6): 0.0; S(7): 0.0; S(11): 100.0	0	5.679e-09
P54259	GRASPGGVSTSSSDGK	S4(Phospho)	S(4): 100.0; S(9): 0.0; T(10): 0.0; S(11): 0.0; S(12): 0.0; S(13): 0.0	0	5.711e-09
Q9NZB2	APSHSESALNNDSK	S3(Phospho)	S(3): 100.0; S(5): 0.0; S(7): 0.0; S(13): 0.0	0	5.723e-09
B3KP82	RRDSDGVDGFEAEGK	S4(Phospho)	S(4): 100.0	0	5.769e-09
Q86VQ1	VPCNVEGISPELEK	C3(Carbamidomethyl); S9(Phospho)	S(9): 100.0	0	5.785e-09
P12270	RPSTSQTVSTPAPVPVIESTEAIEAK	T4(Phospho)	S(3): 5.2; T(4): 89.5; S(5): 5.2; T(7): 0.0; S(9): 0.0; T(10): 0.0; S(19): 0.0; T(20): 0.0	0	5.786e-09
B3KY47	TVSTSSTSGNDFEETK	S3(Phospho)	T(1): 0.0; S(3): 100.0; T(4): 0.0; S(5): 0.0; S(6): 0.0; T(7): 0.0; S(8): 0.0; T(15): 0.0	0	5.814e-09
E9PGM9	VVNPLIGLLGEYGGDSDYEEEEEEEQTPPPQPR	Y18(Phospho)	Y(12): 99.0; S(16): 0.5; Y(18): 0.5; T(27): 0.0	0	5.822e-09
A0A060VCU4	KGGSYSQAASSDSAQGSDVSLTACK	S4(Phospho); C24(Carbamidomethyl)	S(4): 48.7; Y(5): 48.7; S(6): 2.7; S(10): 0.0; S(11): 0.0; S(13): 0.0; S(17): 0.0; S(20): 0.0; T(22): 0.0	0	5.831e-09
B3KT25	QPATPTAAESSEGEGEEGDDGGETESR	S10(Phospho); S11(Phospho)	T(4): 0.0; T(6): 13.6; S(10): 93.2; S(11): 93.2; T(24): 0.0; S(26): 0.0	0	5.835e-09
D6PAV9	SAFTPATATGSSPSPVLGQGEK	S12(Phospho); S14(Phospho)	S(1): 0.0; T(4): 0.0; T(7): 0.2; T(9): 0.2; S(11): 49.9; S(12): 49.9; S(14): 99.8	0	5.9e-09
B2RA91	TEELIESPKLESSEGEIIQTVDR	S7(Phospho)	T(1): 0.0; S(7): 100.0; S(12): 0.0; S(13): 0.0; T(20): 0.0	0	5.936e-09
A0A087WV66	IACKSPPPESMDTPTSTR	C3(Carbamidomethyl); S5(Phospho)	S(5): 100.0; S(10): 0.0; T(13): 0.0; T(15): 0.0; S(16): 0.0; T(17): 0.0	0	5.954e-09
Q76I76	SHSDSDLSDHHEPICKPGLELNKK	S3(Phospho); C15(Carbamidomethyl)	S(1): 5.4; S(3): 89.2; S(5): 5.4; S(8): 0.0	0	5.966e-09
Q8WWQ0	TAFYNEDDSEEEQR	S9(Phospho)	T(1): 0.0; Y(4): 0.0; S(9): 100.0	0	5.974e-09
Q9Y266	QDTEEDEEEDEKDKGK	T3(Phospho)	T(3): 100.0	0	5.982e-09
B2RDP6	RRTCETGEPMEAESGDTSSEGPAQVYLPGR	T3(Phospho); C4(Carbamidomethyl)	T(3): 99.6; T(6): 0.4; S(14): 0.0; T(17): 0.0; S(18): 0.0; S(19): 0.0; Y(26): 0.0	0	6.043e-09
Q6UN15	ERDHSPTPSVFNSDEER	S5(Phospho)	S(5): 100.0; T(7): 0.0; S(9): 0.0; S(13): 0.0	0	6.053e-09
P51532	DSDAGSSTPTTSTR	T8(Phospho)	S(2): 0.0; S(6): 0.0; S(7): 0.0; T(8): 96.8; T(10): 0.1; T(11): 3.0; S(12): 0.1; T(13): 0.0	0	6.096e-09
Q9BTC0	QEAIPDLEDSPPVSDSEEQQESAR	S10(Phospho); S14(Phospho)	S(10): 100.0; S(14): 100.0; S(16): 0.0; S(22): 0.0	0	6.096e-09
J3KS94	TTSEDNEVFGEADANQNNGTSSQDTAVTDSKR	S3(Phospho)	T(1): 33.3; T(2): 33.3; S(3): 33.3; T(20): 0.0; S(21): 0.0; S(22): 0.0; T(25): 0.0; T(28): 0.0; S(30): 0.0	0	6.123e-09
Q9H063	LSKSQGGEEEGPLSDK	S4(Phospho)	S(2): 0.0; S(4): 100.0; S(14): 0.0	0	6.132e-09
A0A024R2H0	TSSTLDSEGTFNSYR	S2(Phospho)	T(1): 50.0; S(2): 50.0; S(3): 0.0; T(4): 0.0; S(7): 0.0; T(10): 0.0; S(13): 0.0; Y(14): 0.0	0	6.143e-09
Q9C0C2	RDSLGAYASQDANEQGQDLGK	S3(Phospho)	S(3): 100.0; Y(7): 0.0; S(9): 0.0	0	6.18e-09
Q96DP0	KVTSPSSSSSSSSSDSESDDEADVSEVTPR	S14(Phospho); S16(Phospho); S18(Phospho)	Too many isoforms	0	6.229e-09
Q14978	ASESSSSEESSDDDDEEDQKKQPVQK	S10(Phospho)	S(2): 0.0; S(4): 0.0; S(5): 0.0; S(6): 0.0; S(7): 0.0; S(10): 92.7; S(11): 7.3	0	6.243e-09
Q9NYF8	KAEGEPQEESPLK	S10(Phospho)	S(10): 100.0	0	6.271e-09
Q96DP0	VTSPSSSSSSSSSDSESDDEADVSEVTPR	S17(Phospho)	T(2): 0.0; S(3): 0.0; S(5): 0.0; S(6): 0.0; S(7): 0.0; S(8): 0.0; S(9): 0.0; S(10): 0.0; S(11): 0.0; S(12): 0.0; S(13): 0.0; S(15): 0.0; S(17): 100.0; S(24): 0.0; T(27): 0.0	0	6.372e-09
D3DVC4	SLGEQDQMTLRPPEK	S1(Phospho)	S(1): 100.0; T(9): 0.0	0	6.383e-09
P25054	ALEAELDAQHLSETFDNIDNLSPK	S22(Phospho)	S(12): 0.0; T(14): 0.0; S(22): 100.0	0	6.413e-09
Q9UKS6	DGTAPPPQSPGSPGTGQDEEWSDEESPR	S22(Phospho)	T(3): 0.0; S(9): 0.0; S(12): 0.0; T(15): 0.0; S(22): 100.0; S(26): 0.0	0	6.43e-09
Q5T1M5	RPSQEQSASASSGQPQAPLNR	S3(Phospho)	S(3): 100.0; S(7): 0.0; S(9): 0.0; S(11): 0.0; S(12): 0.0	0	6.439e-09
A8K9U6	FLENGSQEDLLHGNPGSTYLASNSTSAPNWK	S6(Phospho)	S(6): 100.0; S(17): 0.0; T(18): 0.0; Y(19): 0.0; S(22): 0.0; S(24): 0.0; T(25): 0.0; S(26): 0.0	0	6.44e-09
Q96T23	LHRIETDEEESCDNAHGDANQPAR	T6(Phospho); C12(Carbamidomethyl)	T(6): 100.0; S(11): 0.0	0	6.481e-09
Q9Y2W1	SSSKDSRPSQAAGDNQGDEAKEQTFSGGTSQDTK	S2(Phospho)	S(1): 48.1; S(2): 48.1; S(3): 3.9; S(6): 0.0; S(9): 0.0; T(24): 0.0; S(26): 0.0; T(29): 0.0; S(30): 0.0; T(33): 0.0	0	6.548e-09
A6N6J7	NHSNAQFIESYVCR	S3(Phospho); C13(Carbamidomethyl)	S(3): 100.0; S(10): 0.0; Y(11): 0.0	0	6.605e-09
A8K5Q1	CAPSAGSPAAAVGRESPGAAATSSSGPQAQQHR	C1(Carbamidomethyl); S16(Phospho)	S(4): 0.0; S(7): 0.0; S(16): 100.0; T(22): 0.0; S(23): 0.0; S(24): 0.0; S(25): 0.0	0	6.653e-09
J3KSY7	SEANDAVNSSTKEEK	S9(Phospho)	S(1): 0.0; S(9): 49.5; S(10): 49.5; T(11): 1.0	0	6.669e-09
Q6PKG0	NTFTAWSDEESDYEIDDRDVNK	S7(Phospho)	T(2): 0.0; T(4): 0.0; S(7): 100.0; S(11): 0.0; Y(13): 0.0	0	6.685e-09
S4R3H4	SSSISEEKGDSDDEKPR	S11(Phospho)	S(1): 0.0; S(2): 0.0; S(3): 0.0; S(5): 0.0; S(11): 100.0	0	6.686e-09
F6SS63	SSSSGSDDYAYTQALLLHQR	S1(Phospho)	S(1): 4.8; S(2): 0.3; S(3): 94.9; S(4): 0.0; S(6): 0.0; Y(9): 0.0; Y(11): 0.0; T(12): 0.0	0	6.709e-09
Q68CX0	ELDDDVTESVKDLLSNEDAADDAFK	T7(Phospho)	T(7): 50.0; S(9): 50.0; S(15): 0.0	0	6.736e-09
B3KNP0	IDENSDKEMEVEESPEK	S5(Phospho); S14(Phospho)	S(5): 100.0; S(14): 100.0	0	6.741e-09
Q5H924	LGSSGLGSASSIQAAVR	S8(Phospho)	S(3): 0.0; S(4): 0.0; S(8): 100.0; S(10): 0.0; S(11): 0.0	0	6.749e-09
Q96AP5	SSDKFCSPISSELAQNHEFYK	S2(Phospho); C6(Carbamidomethyl)	S(1): 50.0; S(2): 50.0; S(7): 0.0; S(10): 0.0; S(11): 0.0; Y(20): 0.0	0	6.757e-09
P10398	IRSTSTPNVHMVSTTAPMDSNLIQLTGQSFSTDAAGSR	T6(Phospho)	S(3): 45.0; T(4): 5.0; S(5): 5.0; T(6): 45.0; S(13): 0.0; T(14): 0.0; T(15): 0.0; S(20): 0.0; T(26): 0.0; S(29): 0.0; S(31): 0.0; T(32): 0.0; S(37): 0.0	0	6.817e-09
Q71RC2	ASTASPCNNNINAATAVALQEPR	S2(Phospho); C7(Carbamidomethyl)	S(2): 96.0; T(3): 4.0; S(5): 0.0; T(15): 0.0	0	6.826e-09
Q5T6F0	APASPGAGSDAQGPQFGWDHSLHK	S4(Phospho)	S(4): 100.0; S(9): 0.0; S(21): 0.0	0	6.835e-09
H0YB24	SVASNQSEMEFSSLQDMPK	S1(Phospho); S4(Phospho); S7(Phospho)	S(1): 100.0; S(4): 100.0; S(7): 100.0; S(12): 0.0; S(13): 0.0	0	6.845e-09
A0A087WZ06	ELEEEEENSDEDELDSHTMVK	S9(Phospho)	S(9): 100.0; S(16): 0.0; T(18): 0.0	0	6.848e-09
Q5STZ8	KLSVPTSDEEDEVPAPKPR	S7(Phospho)	S(3): 0.0; T(6): 3.4; S(7): 96.6	0	6.859e-09
A0A024R9Y2	TFPLAHSPQAECEDQLDAQER	S7(Phospho); C12(Carbamidomethyl)	T(1): 0.0; S(7): 100.0	0	6.871e-09
Q9NTI5	AESPESSAIESTQSTPQK	S3(Phospho)	S(3): 100.0; S(6): 0.0; S(7): 0.0; S(11): 0.0; T(12): 0.0; S(14): 0.0; T(15): 0.0	0	6.906e-09
A0A024R228	KIIPTLEEGLQLPSPTATSQLPLESDAVECLNYQHYK	S14(Phospho); C30(Carbamidomethyl)	T(5): 0.0; S(14): 91.3; T(16): 8.6; T(18): 0.1; S(19): 0.0; S(25): 0.0; Y(33): 0.0; Y(36): 0.0	0	6.922e-09
B3KN82	HIKEEPLSEEEPCTSTAIASPEKK	C13(Carbamidomethyl); S20(Phospho)	S(8): 0.0; T(14): 0.0; S(15): 0.0; T(16): 0.0; S(20): 100.0	0	7.017e-09
Q9BSK3	ILDPNTGEPAPVLSSPPPADVSTFLAFPSPEK	S15(Phospho); S29(Phospho)	T(6): 0.0; S(14): 6.7; S(15): 93.3; S(22): 0.0; T(23): 0.0; S(29): 100.0	0	7.03e-09
O43719	AEEGDADEKLFEESDDKEDEDADGK	S14(Phospho)	S(14): 100.0	0	7.034e-09
Q7Z309	RIDFTPVSPAPSPTR	S8(Phospho); S12(Phospho)	T(5): 0.0; S(8): 100.0; S(12): 100.0; T(14): 0.0	0	7.06e-09
Q68CX0	TSELIVDGQEEKDTDVEEGSEVEDERPAWNSK	T14(Phospho)	T(1): 0.0; S(2): 0.0; T(14): 100.0; S(20): 0.0; S(31): 0.0	0	7.168e-09
A1L020	QNSLGCIGECGVDSGFEAPR	S3(Phospho); C6(Carbamidomethyl); C10(Carbamidomethyl)	S(3): 100.0; S(14): 0.0	0	7.192e-09
O60763	LKDLGHPVEEEDELESGDQEDEDDESEDPGK	S16(Phospho)	S(16): 100.0; S(26): 0.0	0	7.216e-09
Q9H9J4	SKPSPQKDQALGDGIAPPQK	S4(Phospho)	S(1): 0.0; S(4): 100.0	0	7.251e-09
C9JAT7	SESLIDASEDSQLEAAIR	S11(Phospho)	S(1): 0.0; S(3): 0.0; S(8): 0.0; S(11): 100.0	0	7.255e-09
B3KTG4	ASGEMASAQYITAALR	S2(Phospho)	S(2): 100.0; S(7): 0.0; Y(10): 0.0; T(12): 0.0	0	7.256e-09
B2R7C5	SEDESETEDEEEKSQEDQEQKR	S5(Phospho)	S(1): 0.0; S(5): 100.0; T(7): 0.0; S(14): 0.0	0	7.261e-09
Q96RK0	FAELPEFRPEEVLPSPTLQSLATSPR	S15(Phospho); S24(Phospho)	S(15): 100.0; T(17): 0.0; S(20): 0.0; T(23): 0.4; S(24): 99.5	0	7.265e-09
F8W7U3	ASALLFSSDEEDQWNIPASQTHLASDSR	S7(Phospho); S8(Phospho)	S(2): 0.1; S(7): 99.9; S(8): 99.9; S(19): 0.0; T(21): 0.0; S(25): 0.0; S(27): 0.0	0	7.275e-09
R4GMM2	LTGPPSAGPGPAEPDSDDDSSDLVIENR	S16(Phospho)	T(2): 0.0; S(6): 0.0; S(16): 100.0; S(20): 0.0; S(21): 0.0	0	7.295e-09
H0YB24	LEDSEVRSVASNQSEMEFSSLQDMPK	S4(Phospho)	S(4): 95.2; S(8): 4.8; S(11): 0.0; S(14): 0.0; S(19): 0.0; S(20): 0.0	0	7.314e-09
B3KPT0	RGSQKSTDSPGADAELPESAAR	S3(Phospho); T7(Phospho)	S(3): 100.0; S(6): 50.0; T(7): 50.0; S(9): 0.0; S(19): 0.0	0	7.333e-09
B7Z4W0	KKEPAITSQNSPEAR	S11(Phospho)	T(7): 0.0; S(8): 0.0; S(11): 100.0	0	7.341e-09
E7EMW7	KTASPEDSDMPDHDLEPPR	S4(Phospho)	T(2): 3.7; S(4): 96.3; S(8): 0.0	0	7.351e-09
F8W7U3	KSPYGPPPTGLFDDDDGDDDDDFFSAPHSKPSK	S2(Phospho)	S(2): 50.0; Y(4): 50.0; T(9): 0.0; S(25): 0.0; S(29): 0.0; S(32): 0.0	0	7.386e-09
Q9UQ98	QLSSSSSYSGDISR	S3(Phospho)	S(3): 99.8; S(4): 0.2; S(5): 0.0; S(6): 0.0; S(7): 0.0; Y(8): 0.0; S(9): 0.0; S(13): 0.0	0	7.402e-09
Q96HA1	SSSMSSLTGAYASGIPSSSR	S3(Phospho)	S(1): 0.2; S(2): 0.2; S(3): 99.7; S(5): 0.0; S(6): 0.0; T(8): 0.0; Y(11): 0.0; S(13): 0.0; S(17): 0.0; S(18): 0.0; S(19): 0.0	0	7.435e-09
Q9H2Y7	ATGDGSSPELPSLER	S7(Phospho)	T(2): 0.0; S(6): 0.0; S(7): 100.0; S(12): 0.0	0	7.44e-09
B2RWP4	MQESPKLPQQSYNFDPDTCDESVDPFK	S4(Phospho); C19(Carbamidomethyl)	S(4): 100.0; S(11): 0.0; Y(12): 0.0; T(18): 0.0; S(22): 0.0	0	7.442e-09
Q8WUZ0	GTEPSPGGTPQPSRPVSPAGPPEGVPEEAQPPR	S17(Phospho)	T(2): 0.0; S(5): 0.0; T(9): 0.0; S(13): 0.7; S(17): 99.3	0	7.443e-09
Q6PKG0	ESPRPLQLPGAEGPAISDGEEGGGEPGAGGGAAGAAGAGR	S17(Phospho)	S(2): 9.8; S(17): 90.2	0	7.463e-09
B4DI17	RQESSSSLEMPSGVALEEGAHVLR	S4(Phospho)	S(4): 98.9; S(5): 0.4; S(6): 0.4; S(7): 0.4; S(12): 0.0	0	7.464e-09
A0A087WXV6	ASPPPQGPLPGPPGALHR	S2(Phospho)	S(2): 100.0	0	7.521e-09
O75396	NLGSINTELQDVQR	S4(Phospho)	S(4): 100.0; T(7): 0.0	0	7.571e-09
Q7Z6E9	WDKDDFESEEEDVK	S8(Phospho)	S(8): 100.0	0	7.572e-09
Q9BSC0	AYLGYQAVPSGSSGSLSTSSSSSPPGTPSPADAK	S23(Phospho); T27(Phospho)	Y(2): 0.0; Y(5): 0.0; S(10): 0.0; S(12): 0.0; S(13): 0.0; S(15): 0.0; S(17): 0.0; T(18): 0.0; S(19): 0.0; S(20): 0.0; S(21): 0.0; S(22): 10.5; S(23): 89.5; T(27): 98.6; S(29): 1.4	0	7.578e-09
Q96C19	ADLNQGIGEPQSPSR	S12(Phospho)	S(12): 50.0; S(14): 50.0	0	7.593e-09
Q13523	EQPEMEDANSEKSINEENGEVSEDQSQNK	S10(Phospho); S13(Phospho)	S(10): 100.0; S(13): 100.0; S(22): 0.0; S(26): 0.0	0	7.608e-09
A0A024RAP0	DDSIISSLDVTDIAPSR	S7(Phospho)	S(3): 0.0; S(6): 0.0; S(7): 100.0; T(11): 0.0; S(16): 0.0	0	7.612e-09
I3L213	RQSSTPSAPELGQQPDVNISEWK	S7(Phospho)	S(3): 25.0; S(4): 25.0; T(5): 25.0; S(7): 25.0; S(20): 0.0	0	7.62e-09
H0YE82	SLGLSLSGGDQEDAGR	S7(Phospho)	S(1): 0.0; S(5): 0.0; S(7): 100.0	0	7.633e-09
A1L3A9	KASVVDPSTESSPAPQEGSEQPASPASPLSSR	S3(Phospho); S31(Phospho)	S(3): 100.0; S(8): 0.0; T(9): 0.0; S(11): 0.0; S(12): 0.0; S(19): 0.0; S(24): 0.0; S(27): 99.9; S(30): 0.1; S(31): 0.0	0	7.652e-09
Q9H1B7	TTPPESAPQNGPSPMAALMSVADTLGTAHSPK	S30(Phospho)	T(1): 0.0; T(2): 0.0; S(6): 0.0; S(13): 0.0; S(20): 0.0; T(24): 0.0; T(27): 0.1; S(30): 99.9	0	7.69e-09
E7EMW7	QEPVKTEMGPPPSPASTCSDASSIASSASMPYK	S13(Phospho); C18(Carbamidomethyl)	T(6): 0.8; S(13): 99.2; S(16): 0.0; T(17): 0.0; S(19): 0.0; S(22): 0.0; S(23): 0.0; S(26): 0.0; S(27): 0.0; S(29): 0.0; Y(32): 0.0	0	7.691e-09
Q9Y4B5	GAPPGSPEPPALLAAPLAAGACPGGR	S6(Phospho); C22(Carbamidomethyl)	S(6): 100.0	0	7.71e-09
Q15750	SLLQSEQQPSWTDDLPLCHLSGVGSASNR	S1(Phospho); C18(Carbamidomethyl)	S(1): 100.0; S(5): 0.0; S(10): 0.0; T(12): 0.0; S(21): 0.0; S(25): 0.0; S(27): 0.0	0	7.752e-09
E5RJY1	SHTSEGAHLDITPNSGAAGNSAGPK	T3(Phospho)	S(1): 0.2; T(3): 99.6; S(4): 0.2; T(12): 0.0; S(15): 0.0; S(21): 0.0	0	7.759e-09
U3KQ48	SDLRKSPVFSDEDSDLDFDISK	S6(Phospho); S14(Phospho)	S(1): 0.0; S(6): 100.0; S(10): 0.0; S(14): 100.0; S(21): 0.0	0	7.787e-09
Q15717	NVALLSQLYHSPAR	S11(Phospho)	S(6): 0.0; Y(9): 0.0; S(11): 100.0	0	7.802e-09
A4LAA3	RPTETNPVTSNSDEECNETVK	S12(Phospho); C16(Carbamidomethyl)	T(3): 0.0; T(5): 0.0; T(9): 0.0; S(10): 0.0; S(12): 100.0; T(19): 0.0	0	7.876e-09
A0A024R3E4	AMLSQMNVTAPTSPPVQQNMMNSASAMNQR	T12(Phospho)	S(4): 0.0; T(9): 48.0; T(12): 48.0; S(13): 4.0; S(23): 0.0; S(25): 0.0	0	7.884e-09
B2RA91	SPISDNSGCDAPGNSNPSLSVPSSAESEK	S1(Phospho); C9(Carbamidomethyl)	S(1): 100.0; S(4): 0.0; S(7): 0.0; S(15): 0.0; S(18): 0.0; S(20): 0.0; S(23): 0.0; S(24): 0.0; S(27): 0.0	0	7.922e-09
Q5W9G0	TRSPSPTLGESLAPHK	S3(Phospho); S5(Phospho)	T(1): 50.1; S(3): 50.1; S(5): 99.9; T(7): 0.0; S(11): 0.0	0	7.967e-09
B4DVQ5	QNPEQSADEDAEKNEEDSEGSSDEDEDEDGVSAATFLKK	S6(Phospho); S18(Phospho); S21(Phospho); S22(Phospho)	S(6): 100.0; S(18): 100.0; S(21): 100.0; S(22): 100.0; S(32): 0.0; T(35): 0.0	0	8.058e-09
Q9BTE3	SYEDDDDMDLQPNK	S1(Phospho)	S(1): 97.7; Y(2): 2.3	0	8.085e-09
C9JE98	TDDTSGEDNDEKEAVASK	T4(Phospho); S5(Phospho)	T(1): 0.0; T(4): 100.0; S(5): 100.0; S(17): 0.0	0	8.117e-09
O43237	KTGSPGSPGAGGVQSTAK	S7(Phospho)	T(2): 0.0; S(4): 0.0; S(7): 100.0; S(15): 0.0; T(16): 0.0	0	8.119e-09
O75376	SHVSSEPYEPISPPQVPVVHEK	S12(Phospho)	S(1): 0.0; S(4): 0.0; S(5): 0.0; Y(8): 0.0; S(12): 100.0	0	8.186e-09
F8W7U3	VQSTADIFGDEEGDLFKEK	T4(Phospho)	S(3): 4.2; T(4): 95.8	0	8.207e-09
N0E638	IHPMAYQLQLQAASNFKSPVK	S18(Phospho)	Y(6): 0.0; S(14): 0.0; S(18): 100.0	0	8.211e-09
P67809	AADPPAENSSAPEAEQGGAE	S10(Phospho)	S(9): 3.4; S(10): 96.6	0	8.228e-09
C9JRJ5	LSPTSLVHPVMSTLPELSCK	S2(Phospho); C19(Carbamidomethyl)	S(2): 100.0; T(4): 0.0; S(5): 0.0; S(12): 0.0; T(13): 0.0; S(18): 0.0	0	8.25e-09
K7ER16	QETELSPEMISSGSWR	S6(Phospho)	T(3): 0.0; S(6): 100.0; S(11): 0.0; S(12): 0.0; S(14): 0.0	0	8.288e-09
B4DJ12	RGAAAADLLSSSPESQHGGTQSPGGGQPLLQPTK	S11(Phospho)	S(10): 7.2; S(11): 85.6; S(12): 7.2; S(15): 0.0; T(20): 0.0; S(22): 0.0; T(33): 0.0	0	8.315e-09
P60468	PGPTPSGTNVGSSGRSPSK	S16(Phospho)	T(4): 0.0; S(6): 0.0; T(8): 0.0; S(12): 0.0; S(13): 0.0; S(16): 100.0; S(18): 0.0	0	8.317e-09
A0A024RDB2	NLEELEEKSTTPPPAEPVSLPQEPPKPR	T11(Phospho)	S(9): 3.1; T(10): 48.5; T(11): 48.5; S(19): 0.0	0	8.321e-09
B7Z990	SIEDDEEGHLICQSGDVLR	S1(Phospho); C12(Carbamidomethyl)	S(1): 100.0; S(14): 0.0	0	8.35e-09
Q9Y446	SLSLSLADSGHLPDVHGFNSYGSHR	S1(Phospho)	S(1): 99.8; S(3): 0.2; S(5): 0.0; S(9): 0.0; S(20): 0.0; Y(21): 0.0; S(23): 0.0	0	8.367e-09
Q59FL8	ELVEPLTPSGEAPNQALLR	T7(Phospho)	T(7): 100.0; S(9): 0.0	0	8.377e-09
O43719	HFSEHPSTSKMNAQETATGMAFEEPIDEK	S7(Phospho)	S(3): 86.3; S(7): 6.6; T(8): 6.6; S(9): 0.5; T(16): 0.0; T(18): 0.0	0	8.4e-09
Q13428	LGAGEGGEASVSPEKTSTTSK	S12(Phospho)	S(10): 0.0; S(12): 100.0; T(16): 0.0; S(17): 0.0; T(18): 0.0; T(19): 0.0; S(20): 0.0	0	8.402e-09
F8WAE5	SDKSPDLAPTPAPQSTPR	S4(Phospho)	S(1): 0.0; S(4): 100.0; T(10): 0.0; S(15): 0.0; T(16): 0.0	0	8.409e-09
E7EVA0	AGGPSDDDNADKPK	S5(Phospho)	S(5): 100.0	0	8.44e-09
D6W5C0	GEQVSQNGLPAEQGSPR	S15(Phospho)	S(5): 0.0; S(15): 100.0	0	8.441e-09
Q6P4Q7	MENSPQFPIDGCTTHMENLAEK	S4(Phospho); C12(Carbamidomethyl)	S(4): 100.0; T(13): 0.0; T(14): 0.0	0	8.455e-09
Q9NZ53	HPSLNGGGALNGPGSWGALMGGK	S3(Phospho)	S(3): 100.0; S(15): 0.0	0	8.468e-09
Q8IVT2	QGVSYSVHAYTGQPSPR	S15(Phospho)	S(4): 0.0; Y(5): 0.0; S(6): 0.0; Y(10): 0.0; T(11): 0.0; S(15): 100.0	0	8.522e-09
Q53SF7	SNTISKPYISNTLPSDAPK	T3(Phospho)	S(1): 0.1; T(3): 99.9; S(5): 0.0; Y(8): 0.0; S(10): 0.0; T(12): 0.0; S(15): 0.0	0	8.528e-09
B4DKX3	QDNDTGNEEQEEEEDDEEEMEEK	T5(Phospho)	T(5): 100.0	0	8.629e-09
B4E106	AAESPDQKDTEGGPKEEESPV	S4(Phospho)	S(4): 100.0; T(10): 0.0; S(19): 0.0	0	8.671e-09
B3KTR0	NSTGGTSVGWDSPPASPLQR	S12(Phospho); S16(Phospho)	S(2): 0.0; T(3): 0.0; T(6): 0.0; S(7): 0.0; S(12): 100.0; S(16): 100.0	0	8.677e-09
B9EIS5	VTNDISPESSPGVGR	S6(Phospho)	T(2): 0.0; S(6): 100.0; S(9): 0.0; S(10): 0.0	0	8.7e-09
Q9H8R7	AQDPAAATASSPSTPDPASAPSTTPASPATPAQPSTSGSASSDAGSGSR	S48(Phospho)	T(8): 0.0; S(10): 0.0; S(11): 0.0; S(13): 0.0; T(14): 0.0; S(19): 0.0; S(22): 0.0; T(23): 0.0; T(24): 0.0; S(27): 0.0; T(30): 0.0; S(35): 0.9; T(36): 7.8; S(37): 73.1; S(39): 7.8; S(41): 0.9; S(42): 0.9; S(46): 0.9; S(48): 7.8	0	8.711e-09
Q12888	NSPEDLGLSLTGDSCK	S2(Phospho); C15(Carbamidomethyl)	S(2): 100.0; S(9): 0.0; T(11): 0.0; S(14): 0.0	0	8.763e-09
Q14247	TQTPPVSPAPQPTEER	T3(Phospho)	T(1): 0.0; T(3): 100.0; S(7): 0.0; T(13): 0.0	0	8.766e-09
B9EIS5	ILEDHGSPAGEIDDEDKDKDETETVK	S7(Phospho)	S(7): 100.0; T(22): 0.0; T(24): 0.0	0	8.849e-09
P16949	ASGQAFELILSPR	S11(Phospho)	S(2): 0.0; S(11): 100.0	0	8.907e-09
A0JP10	KVPVQEIDDDFFPSSGEEAEAASVGEGGGGGR	S14(Phospho); S15(Phospho)	S(14): 100.0; S(15): 100.0; S(23): 0.0	0	8.948e-09
F1T0I1	QNPHDGVVTPAASPSLPQPGLQMPGQWGPVQGGPQPSGQHR	T9(Phospho); S13(Phospho)	T(9): 86.7; S(13): 97.8; S(15): 15.4; S(37): 0.0	0	8.981e-09
Q59FS7	KAQAVSEEEEEEEGK	S6(Phospho)	S(6): 100.0	0	9.077e-09
Q68CX0	KQSGSPTLDTAPNGR	S3(Phospho); S5(Phospho)	S(3): 100.0; S(5): 100.0; T(7): 0.0; T(10): 0.0	0	9.079e-09
B4DYT5	AVSLDSPVSVGSSPPVK	S3(Phospho)	S(3): 100.0; S(6): 0.0; S(9): 0.0; S(12): 0.0; S(13): 0.0	0	9.098e-09
B4DZW3	KSEAPAEVTHFSPK	S12(Phospho)	S(2): 0.0; T(9): 0.0; S(12): 100.0	0	9.147e-09
E5RJM0	QQLSPSPGQEAGILPETEK	S4(Phospho)	S(4): 100.0; S(6): 0.0; T(17): 0.0	0	9.197e-09
Q9H2Y7	AAHVPENSDTEQDVLTVKPVR	S8(Phospho)	S(8): 99.9; T(10): 0.1; T(16): 0.0	0	9.207e-09
A8K5D9	QPLSEASNQQPLSGGEEK	S13(Phospho)	S(4): 0.0; S(7): 0.0; S(13): 100.0	0	9.237e-09
M0QZ22	QNLWFANPGGSNSMPSQSR	S13(Phospho)	S(11): 0.2; S(13): 99.8; S(16): 0.0; S(18): 0.0	0	9.384e-09
Q96N67	MSSHTETSSFLQTLTGR	S3(Phospho)	S(2): 4.3; S(3): 95.7; T(5): 0.0; T(7): 0.0; S(8): 0.0; S(9): 0.0; T(13): 0.0; T(15): 0.0	0	9.413e-09
Q9NR30	VTKNEEPSEEEIDAPKPK	S8(Phospho)	T(2): 0.0; S(8): 100.0	0	9.429e-09
B2R749	VLGRSPLTILQDDNSPGTLTLR	S5(Phospho); S15(Phospho)	S(5): 100.0; T(8): 0.0; S(15): 100.0; T(18): 0.0; T(20): 0.0	0	9.442e-09
Q96C19	RADLNQGIGEPQSPSR	S13(Phospho)	S(13): 97.0; S(15): 3.0	0	9.475e-09
G5E9C0	VTQGAASPGHGIQEK	S7(Phospho)	T(2): 0.0; S(7): 100.0	0	9.51e-09
H3BS86	LGAGGGSPEKSPSAQELK	S11(Phospho)	S(7): 0.0; S(11): 100.0; S(13): 0.0	0	9.515e-09
Q71RC2	SNVVSPTKNEDNGAPENSVEKPHEKPEAR	T7(Phospho)	S(1): 0.0; S(5): 6.3; T(7): 93.7; S(18): 0.0	0	9.524e-09
P02545	NKSNEDQSMGNWQIK	S3(Phospho)	S(3): 100.0; S(8): 0.0	0	9.568e-09
Q9HCK8	APGYPSSPVTTASGTTLR	S7(Phospho)	Y(4): 0.0; S(6): 0.1; S(7): 99.9; T(10): 0.0; T(11): 0.0; S(13): 0.0; T(15): 0.0; T(16): 0.0	0	9.595e-09
Q9UKL0	REREESEDELEEANGNNPIDIEVDQNK	S6(Phospho)	S(6): 100.0	0	9.616e-09
Q5STZ8	KAEQGSEEEGEGEEEEEEGGESKADDPYAHLSK	S6(Phospho)	S(6): 100.0; S(22): 0.0; Y(28): 0.0; S(32): 0.0	0	9.623e-09
G5EA03	SPEPEATLTFPFLDK	S1(Phospho)	S(1): 100.0; T(7): 0.0; T(9): 0.0	0	9.632e-09
Q9H4L5	TYSAPAINAIQGGSFESPKK	S3(Phospho)	T(1): 0.0; Y(2): 0.2; S(3): 99.8; S(14): 0.0; S(17): 0.0	0	9.638e-09
Q8N556	EAYSGCSGPVDSECPPPPSSPVHK	C6(Carbamidomethyl); C14(Carbamidomethyl); S20(Phospho)	Y(3): 0.0; S(4): 0.0; S(7): 0.0; S(12): 0.0; S(19): 50.0; S(20): 50.0	0	9.655e-09
A0A087WUT6	KQSFDDNDSEELEDKDSK	S3(Phospho); S9(Phospho)	S(3): 100.0; S(9): 100.0; S(17): 0.0	0	9.659e-09
Q7Z497	WDQTADQTPGATPK	T12(Phospho)	T(4): 0.0; T(8): 0.0; T(12): 100.0	0	9.664e-09
Q5SXM2	WGEASNDEDDPKDK	S5(Phospho)	S(5): 100.0	0	9.667e-09
Q3B726	HQEVQDQDPVFQGSDSSGYQSDHK	S21(Phospho)	S(14): 0.0; S(16): 0.2; S(17): 0.2; Y(19): 0.0; S(21): 99.7	0	9.688e-09
H3BQZ7	SGDETPGSEVPGDKAAEEQGDDQDSEK	T5(Phospho)	S(1): 0.4; T(5): 99.6; S(8): 0.0; S(25): 0.0	0	9.689e-09
Q8WX93	QFIAAQNLGPASGHGTPASSPSSSSLPSPMSPTPR	S31(Phospho)	S(12): 0.0; T(16): 0.0; S(19): 0.0; S(20): 0.0; S(22): 0.0; S(23): 0.0; S(24): 0.0; S(25): 0.0; S(28): 9.7; S(31): 89.3; T(33): 1.1	0	9.73e-09
B2R7C5	RSEDESETEDEEEKSQEDQEQK	S6(Phospho)	S(2): 0.0; S(6): 99.8; T(8): 0.2; S(15): 0.0	0	9.741e-09
S5FZ81	GTSDSSSGNVSEGESPPDSQEDSFQGR	S11(Phospho)	T(2): 0.0; S(3): 0.0; S(5): 0.0; S(6): 0.0; S(7): 0.0; S(11): 100.0; S(15): 0.0; S(19): 0.0; S(23): 0.0	0	9.765e-09
B3KMD2	QRSHILEDDENSVDISMLK	S3(Phospho)	S(3): 100.0; S(12): 0.0; S(16): 0.0	0	9.807e-09
Q92733	IAAPELHKGDSDSEEDEPTK	S11(Phospho)	S(11): 100.0; S(13): 0.0; T(19): 0.0	0	9.848e-09
K7ENH8	TSSTDEVLSLEEK	S3(Phospho)	T(1): 0.0; S(2): 0.0; S(3): 97.0; T(4): 3.0; S(9): 0.0	0	9.887e-09
D6W5C0	AQTLPTSVVTITSESSPGK	T3(Phospho)	T(3): 100.0; T(6): 0.0; S(7): 0.0; T(10): 0.0; T(12): 0.0; S(13): 0.0; S(15): 0.0; S(16): 0.0	0	9.89e-09
B3KRT9	KQQHVISTEEGDMMETNSTDDEKSTAK	S18(Phospho); T19(Phospho)	S(7): 0.0; T(8): 0.0; T(16): 0.0; S(18): 100.0; T(19): 100.0; S(24): 0.0; T(25): 0.0	0	1.004e-08
H0YBN6	NQVVSSTNGELNTDDPTAGR	S6(Phospho)	S(5): 0.0; S(6): 99.8; T(7): 0.2; T(13): 0.0; T(17): 0.0	0	1.006e-08
H0Y704	GGQGDPAVPTQQPADPSTPEQQNSPSGSEQFVR	S24(Phospho)	T(10): 0.0; S(17): 0.0; T(18): 0.0; S(24): 100.0; S(26): 0.0; S(28): 0.0	0	1.016e-08
H7BZV4	SAGEEEDGPVLTDEQK	S1(Phospho)	S(1): 100.0; T(12): 0.0	0	1.019e-08
C9J0I9	SQDATFSPGSEQAEK	S7(Phospho)	S(1): 0.0; T(5): 0.0; S(7): 100.0; S(10): 0.0	0	1.019e-08
P07900	ESEDKPEIEDVGSDEEEEKK	S13(Phospho)	S(2): 0.0; S(13): 100.0	0	1.02e-08
A8K8G0	SCVEEPEPEPEAAEGDGDK	S1(Phospho); C2(Carbamidomethyl)	S(1): 100.0	0	1.022e-08
Q5VWN6	NGTKSPEAATPVGK	S5(Phospho)	T(3): 0.0; S(5): 100.0; T(10): 0.0	0	1.025e-08
Q14542	AELLQSDENGIPSSPQK	S14(Phospho)	S(6): 0.0; S(13): 0.1; S(14): 99.9	0	1.026e-08
O95714	KQSPVPALPIVVQLMEMGFSR	S3(Phospho)	S(3): 100.0; S(20): 0.0	0	1.027e-08
Q12982	KGSITEYTAAEEKEDGR	S3(Phospho)	S(3): 100.0; T(5): 0.0; Y(7): 0.0; T(8): 0.0	0	1.028e-08
Q5W7F7	IGDSSQGDNNLQK	S5(Phospho)	S(4): 0.0; S(5): 100.0	0	1.029e-08
H7C3B5	ALSAAVADSLTNSPR	S13(Phospho)	S(3): 0.0; S(9): 0.0; T(11): 50.0; S(13): 50.0	0	1.038e-08
Q15751	SRSESDLSQPESDEEGYALSGR	S3(Phospho)	S(1): 50.0; S(3): 50.0; S(5): 0.0; S(8): 0.0; S(12): 0.0; Y(17): 0.0; S(20): 0.0	0	1.045e-08
A0A024RA27	GFGDGYNGYGGGPGGGNFGGSPGYGGGR	S21(Phospho)	Y(6): 0.0; Y(9): 0.0; S(21): 100.0; Y(24): 0.0	0	1.046e-08
H7C4T3	KDSSGSVSPNTLSQEEGDQICLYHIR	S8(Phospho); C21(Carbamidomethyl)	S(3): 0.0; S(4): 0.0; S(6): 0.1; S(8): 98.4; T(11): 0.7; S(13): 0.7; Y(23): 0.0	0	1.046e-08
A8K9K6	KSFSKEELMSSDLEETAGSTSIPK	S11(Phospho)	S(2): 0.0; S(4): 0.0; S(10): 6.1; S(11): 93.9; T(16): 0.0; S(19): 0.0; T(20): 0.0; S(21): 0.0	0	1.05e-08
Q5JWB9	LSSTDDGYIDLQFK	S3(Phospho)	S(2): 0.0; S(3): 100.0; T(4): 0.0; Y(8): 0.0	0	1.054e-08
E9PMS6	TPNNVVSTPAPSPDASQLASSLSSQK	T8(Phospho); S12(Phospho)	T(1): 0.0; S(7): 0.5; T(8): 99.5; S(12): 100.0; S(16): 0.0; S(20): 0.0; S(21): 0.0; S(23): 0.0; S(24): 0.0	0	1.06e-08
A0A087WY61	APVPSTCSSTFPEELSPPSHQAK	C7(Carbamidomethyl); S16(Phospho)	S(5): 0.0; T(6): 0.0; S(8): 0.0; S(9): 0.0; T(10): 0.0; S(16): 100.0; S(19): 0.0	0	1.062e-08
A6NNN6	TGSDFSMFEALR	S3(Phospho)	T(1): 0.0; S(3): 100.0; S(6): 0.0	0	1.07e-08
Q86U42	APPGAPGPGPGSGAPGSQEEEEEPGLVEGDPGDGAIEDPELEAIK	S17(Phospho)	S(12): 9.1; S(17): 90.9	0	1.074e-08
B7Z3Y3	GALTGGTEVSALPCTTNAPGNGKPVGSPHVVTSHQSK	C14(Carbamidomethyl); S27(Phospho)	T(4): 0.0; T(7): 0.0; S(10): 0.0; T(15): 0.0; T(16): 0.0; S(27): 100.0; T(32): 0.0; S(33): 0.0; S(36): 0.0	0	1.078e-08
K7EIY0	ELSKEDLSPAFDHSPNK	S14(Phospho)	S(3): 0.0; S(8): 0.0; S(14): 100.0	0	1.079e-08
Q9NZ63	RRGDSESEEDEQDSEEVR	S5(Phospho); S7(Phospho)	S(5): 100.0; S(7): 100.0; S(14): 0.0	0	1.079e-08
O75113	KQFSLENVQEGEILHDAK	S4(Phospho)	S(4): 100.0	0	1.084e-08
Q4KMP7	ASAGPAPGPVVTAEGLHPSLPSPTGNSTPLGSSK	S22(Phospho)	S(2): 0.0; T(12): 0.0; S(19): 0.0; S(22): 47.0; T(24): 47.0; S(27): 4.9; T(28): 0.5; S(32): 0.1; S(33): 0.5	0	1.085e-08
Q8IXQ3	IDAGTMAEPSASPSK	S12(Phospho)	T(5): 0.0; S(10): 3.3; S(12): 93.4; S(14): 3.3	0	1.088e-08
Q14191	STEHLSPNDNENDTSYVIESDEDLEMEMLK	S20(Phospho)	S(1): 0.0; T(2): 0.0; S(6): 0.0; T(14): 0.0; S(15): 0.0; Y(16): 0.0; S(20): 100.0	0	1.094e-08
A8K8G0	GNAEGSSDEEGKLVIDEPAK	S6(Phospho); S7(Phospho)	S(6): 100.0; S(7): 100.0	0	1.097e-08
Q9Y5B6	MADHLEGLSSDDEETSTDITNFNLEK	S9(Phospho); S10(Phospho)	S(9): 100.0; S(10): 100.0; T(15): 0.0; S(16): 0.0; T(17): 0.0; T(20): 0.0	0	1.099e-08
Q9NR30	KAEPSEVDMNSPK	S11(Phospho)	S(5): 0.0; S(11): 100.0	0	1.109e-08
A0A087WVV2	SHVEDGDIAGAPASSPEAPPAEQDPVQLK	S15(Phospho)	S(1): 0.0; S(14): 0.4; S(15): 99.6	0	1.109e-08
Q9Y2W1	ASESSKPWPDATYGTGSASR	S17(Phospho)	S(2): 0.0; S(4): 0.0; S(5): 0.0; T(12): 0.0; Y(13): 0.0; T(15): 0.0; S(17): 96.2; S(19): 3.8	0	1.117e-08
K7EIY0	EDLSPAFDHSPNK	S10(Phospho)	S(4): 0.0; S(10): 100.0	0	1.12e-08
Q9H6Y2	TCEERPAEDGSDEEDPDSMEAPTR	C2(Carbamidomethyl); S11(Phospho)	T(1): 0.0; S(11): 100.0; S(18): 0.0; T(23): 0.0	0	1.12e-08
Q09666	LPSGSGAASPTGSAVDIR	S3(Phospho); S9(Phospho)	S(3): 100.0; S(5): 0.0; S(9): 99.9; T(11): 0.0; S(13): 0.1	0	1.125e-08
E7EPN9	AAGSPSSSDQDEKLPGQDESTAGTSEQNDILK	S6(Phospho); S7(Phospho)	S(4): 99.2; S(6): 8.5; S(7): 7.8; S(8): 84.6; S(20): 0.0; T(21): 0.0; T(24): 0.0; S(25): 0.0	0	1.13e-08
Q86VM9	GPSQEEEDNHSDEEDR	S11(Phospho)	S(3): 0.0; S(11): 100.0	0	1.136e-08
Q9NYF8	SPHSPSPIATPPSQSSSCSDAPMLSTVHSAK	S4(Phospho); S6(Phospho); C18(Carbamidomethyl)	S(1): 87.9; S(4): 13.9; S(6): 97.9; T(10): 0.3; S(13): 0.0; S(15): 0.0; S(16): 0.0; S(17): 0.0; S(19): 0.0; S(25): 0.0; T(26): 0.0; S(29): 0.0	0	1.137e-08
Q8TEK3	VAGPADAPMDSGAEEEKAGAATVK	S11(Phospho)	S(11): 100.0; T(22): 0.0	0	1.142e-08
B3KRA8	VSGQVGSRSPSMISNDSETLEECMVCSDMK	S9(Phospho); C23(Carbamidomethyl); C26(Carbamidomethyl)	S(2): 0.0; S(7): 6.3; S(9): 93.2; S(11): 0.4; S(14): 0.0; S(17): 0.0; T(19): 0.0; S(27): 0.0	0	1.142e-08
B4DT31	QQAAYYAQTSPQGMPQHPPAPQGQ	S10(Phospho)	Y(5): 0.0; Y(6): 0.0; T(9): 50.0; S(10): 50.0	0	1.146e-08
B4E2T1	HADNSSDTEMEDMIAEETLEEMDSELLK	S5(Phospho); S6(Phospho)	S(5): 100.0; S(6): 100.0; T(8): 0.0; T(18): 0.0; S(24): 0.0	0	1.147e-08
Q9BY89	GGSSVEAPCPSDVTPEDDR	C9(Carbamidomethyl); T14(Phospho)	S(3): 0.0; S(4): 0.0; S(11): 0.0; T(14): 100.0	0	1.15e-08
Q96T23	IESDEEEDFENVGK	S3(Phospho)	S(3): 100.0	0	1.154e-08
H3BM18	EVDATSPAPSTSSTVK	S6(Phospho)	T(5): 0.0; S(6): 100.0; S(10): 0.0; T(11): 0.0; S(12): 0.0; S(13): 0.0; T(14): 0.0	0	1.155e-08
E7EX40	HLFSSTENLAAGSWKEPAEGGGLSSDR	S5(Phospho)	S(4): 6.1; S(5): 93.9; T(6): 0.0; S(13): 0.0; S(24): 0.0; S(25): 0.0	0	1.155e-08
Q9BTC0	KPSKYPLCSADAAVSTTPPGSPPPPPPLPEPPVLK	C8(Carbamidomethyl); T17(Phospho); S21(Phospho)	S(3): 0.0; Y(5): 0.0; S(9): 0.0; S(15): 0.9; T(16): 0.9; T(17): 98.3; S(21): 100.0	0	1.155e-08
Q15365	QICLVMLETLSQSPQGR	C3(Carbamidomethyl); S13(Phospho)	T(9): 0.0; S(11): 0.0; S(13): 100.0	0	1.156e-08
Q15365	VMTIPYQPMPASSPVICAGGQDR	S12(Phospho); C17(Carbamidomethyl)	T(3): 0.0; Y(6): 0.0; S(12): 95.0; S(13): 5.0	0	1.162e-08
Q9BY89	KEESDEEETASK	S4(Phospho)	S(4): 100.0; T(9): 0.0; S(11): 0.0	0	1.165e-08
B4DTZ6	SKETSSPGTDDVFTPAPSDSPSSQR	S20(Phospho)	S(1): 0.0; T(4): 0.0; S(5): 0.0; S(6): 0.0; T(9): 0.0; T(14): 0.0; S(18): 0.0; S(20): 99.7; S(22): 0.3; S(23): 0.0	0	1.165e-08
Q32P44	VLGAGGAGPAPATPSR	S15(Phospho)	T(13): 0.0; S(15): 100.0	0	1.166e-08
B5BUB5	TKFASDDEHDEHDENGATGPVK	S5(Phospho)	T(1): 0.0; S(5): 100.0; T(18): 0.0	0	1.169e-08
B2RBM8	LSNPQIEWQNSTIDSEDGEQFDNMTDGVAEPMHGSLAGVK	S15(Phospho)	S(2): 0.0; S(11): 0.1; T(12): 1.1; S(15): 98.8; T(25): 0.0; S(35): 0.0	0	1.17e-08
Q9NR30	SDAGLESDTAMK	S7(Phospho)	S(1): 0.0; S(7): 98.1; T(9): 1.9	0	1.183e-08
O43432	QEEKPKPDPVLKSPSPVLR	S13(Phospho); S15(Phospho)	S(13): 100.0; S(15): 100.0	0	1.184e-08
C9JY26	INSDDSNLYLTASK	S6(Phospho)	S(3): 0.0; S(6): 100.0; Y(9): 0.0; T(11): 0.0; S(13): 0.0	0	1.188e-08
Q9UKX7	VAAETQSPSLFGSTK	S7(Phospho)	T(5): 0.0; S(7): 100.0; S(9): 0.0; S(13): 0.0; T(14): 0.0	0	1.194e-08
Q9NYF8	QKFNDSEGDDTEETEDYR	S6(Phospho)	S(6): 100.0; T(11): 0.0; T(14): 0.0; Y(17): 0.0	0	1.205e-08
Q6PK21	KVEEEGSPGDPDHEASTQGR	S7(Phospho)	S(7): 100.0; S(16): 0.0; T(17): 0.0	0	1.208e-08
Q71UH4	VVEAVNSDSDSEFGIPKK	S7(Phospho); S9(Phospho)	S(7): 100.0; S(9): 100.0; S(11): 0.0	0	1.209e-08
E5KLB6	LTTTGQVTSPVKGASFVTSTNPR	T8(Phospho)	T(2): 0.0; T(3): 0.0; T(4): 0.0; T(8): 95.1; S(9): 4.9; S(15): 0.0; T(18): 0.0; S(19): 0.0; T(20): 0.0	0	1.213e-08
P00558	ALESPERPFLAILGGAK	S4(Phospho)	S(4): 100.0	0	1.214e-08
A8KAH7	GDSESEEDEDLEVPVPSR	S3(Phospho); S5(Phospho)	S(3): 100.0; S(5): 100.0; S(17): 0.0	0	1.214e-08
C9J0I9	NWGAVVRSPEGTPQK	S8(Phospho)	S(8): 100.0; T(12): 0.0	0	1.215e-08
B4E0B7	YQPLASTASDNDFVTPEPR	S6(Phospho)	Y(1): 0.0; S(6): 99.9; T(7): 0.1; S(9): 0.0; T(15): 0.0	0	1.222e-08
O94979	AQGEPVAGHESPKIPYEK	S11(Phospho)	S(11): 100.0; Y(16): 0.0	0	1.223e-08
B7Z843	SLLSHEFQDETDTEEETLYSSK	T11(Phospho)	S(1): 0.0; S(4): 0.0; T(11): 100.0; T(13): 0.0; T(17): 0.0; Y(19): 0.0; S(20): 0.0; S(21): 0.0	0	1.232e-08
Q9Y4H2	SSSSNLGADDGYMPMTPGAALAGSGSGSCR	S3(Phospho); C29(Carbamidomethyl)	S(1): 32.4; S(2): 32.4; S(3): 32.4; S(4): 2.8; Y(12): 0.0; T(16): 0.0; S(24): 0.0; S(26): 0.0; S(28): 0.0	0	1.233e-08
Q9UBB9	GAAEEAELEDSDDEEKPVKQDDFPK	S11(Phospho)	S(11): 100.0	0	1.234e-08
A0A024QZ45	ATPELGSSENSASSPPR	S14(Phospho)	T(2): 0.0; S(7): 0.0; S(8): 0.0; S(11): 0.2; S(13): 4.5; S(14): 95.2	0	1.238e-08
B4DYJ1	NTENCDFLFSPPEVTGR	C5(Carbamidomethyl); S10(Phospho)	T(2): 0.0; S(10): 100.0; T(15): 0.0	0	1.239e-08
A0A024R5L7	ITAAQHSVTGSAVSK	S7(Phospho)	T(2): 0.0; S(7): 100.0; T(9): 0.0; S(11): 0.0; S(14): 0.0	0	1.247e-08
Q6WCQ1	DFTNEAPPAPLPDASASPLSPHR	S20(Phospho)	T(3): 0.0; S(15): 0.0; S(17): 0.0; S(20): 100.0	0	1.249e-08
Q9P2R6	NYAESDHSEDEDNDNNSATAEESTKK	S5(Phospho); S8(Phospho)	Y(2): 0.0; S(5): 100.0; S(8): 100.0; S(17): 0.0; T(19): 0.0; S(23): 0.0; T(24): 0.0	0	1.249e-08
J3KTD8	QQDPSPGSNLGGGDDLK	S5(Phospho)	S(5): 100.0; S(8): 0.0	0	1.253e-08
B4DZR9	TESSPSEASQHSMQSPQK	S15(Phospho)	T(1): 0.0; S(3): 0.0; S(4): 0.0; S(6): 0.0; S(9): 0.0; S(12): 0.0; S(15): 100.0	0	1.256e-08
Q5VT52	SLFSPQNTLAAPTGHPPTSGVEK	S4(Phospho)	S(1): 0.0; S(4): 100.0; T(8): 0.0; T(13): 0.0; T(18): 0.0; S(19): 0.0	0	1.258e-08
P19338	KEDSDEEEDDDSEEDEEDDEDEDEDEDEIEPAAMK	S4(Phospho); S12(Phospho)	S(4): 100.0; S(12): 100.0	0	1.26e-08
Q8N9B5	GAASPVLQEDHCDSLPSVLQVEEK	S4(Phospho); C12(Carbamidomethyl)	S(4): 100.0; S(14): 0.0; S(17): 0.0	0	1.268e-08
G5EA03	MPEANQLHLPNLNSQVDSPSSEKSPVMTPFK	S18(Phospho); S24(Phospho)	S(14): 0.0; S(18): 100.0; S(20): 0.6; S(21): 7.4; S(24): 92.0; T(28): 0.1	0	1.272e-08
Q9H8M2	EREHCDTEGEADDFDPGK	C5(Carbamidomethyl); T7(Phospho)	T(7): 100.0	0	1.273e-08
B4DVR4	GPSHPLDLGTSSPNTSQIHWTPYR	S12(Phospho)	S(3): 0.0; T(10): 0.0; S(11): 4.8; S(12): 95.2; T(15): 0.0; S(16): 0.0; T(21): 0.0; Y(23): 0.0	0	1.274e-08
Q7L804	LSSAHSMSDLSGSHMSSEK	S6(Phospho)	S(2): 0.0; S(3): 0.0; S(6): 99.7; S(8): 0.3; S(11): 0.0; S(13): 0.0; S(16): 0.0; S(17): 0.0	0	1.275e-08
B2RBJ7	GIGLDESELDSEAELMR	S7(Phospho); S11(Phospho)	S(7): 100.0; S(11): 100.0	0	1.282e-08
Q8N5P1	IDDEIDTEVEETQEEK	T7(Phospho)	T(7): 100.0; T(12): 0.0	0	1.284e-08
Q6PK82	HRPSEADEEELAR	S4(Phospho)	S(4): 100.0	0	1.286e-08
H7C3A2	RTSDPSAAVNHVSSTTSLGENYEDDDLVNSDEVMK	S3(Phospho)	T(2): 6.5; S(3): 93.5; S(6): 0.0; S(13): 0.0; S(14): 0.0; T(15): 0.0; T(16): 0.0; S(17): 0.0; Y(22): 0.0; S(30): 0.0	0	1.292e-08
Q96I34	SVSYQLSPLDSTTPHTLVHDK	S3(Phospho)	S(1): 0.2; S(3): 99.8; Y(4): 0.0; S(7): 0.0; S(11): 0.0; T(12): 0.0; T(13): 0.0; T(16): 0.0	0	1.299e-08
A4LAA3	CGLGQENSDNEHLVENEVSLLLEESDLR	C1(Carbamidomethyl); S8(Phospho)	S(8): 100.0; S(19): 0.0; S(25): 0.0	0	1.303e-08
A0A024R228	GSYGDLGGPIITTQVTIPK	S2(Phospho)	S(2): 50.0; Y(3): 50.0; T(12): 0.0; T(13): 0.0; T(16): 0.0	0	1.309e-08
Q96ST3	GDLSDVEEEEEEEMDVDEATGAVK	S4(Phospho)	S(4): 100.0; T(20): 0.0	0	1.312e-08
A0A087WXA6	SGLEELVLSEMNSPSR	S13(Phospho)	S(1): 0.0; S(9): 0.0; S(13): 3.0; S(15): 97.0	0	1.312e-08
H0Y2V6	HDDGTQSDSENAGAHR	S7(Phospho)	T(5): 0.0; S(7): 100.0; S(9): 0.0	0	1.313e-08
Q8IV31	MASEGSMAQEGSPGR	S3(Phospho)	S(3): 100.0; S(6): 0.0; S(12): 0.0	0	1.314e-08
E7EV07	AHSIAGFSPECPEDPVGQNVVK	S3(Phospho); C11(Carbamidomethyl)	S(3): 100.0; S(8): 0.0	0	1.32e-08
J3KTJ1	ATSNVFAMFDQSQIQEFK	T2(Phospho); S3(Phospho)	T(2): 100.0; S(3): 100.0; S(12): 0.0	0	1.323e-08
P18858	VLGSEGEEEDEALSPAK	S4(Phospho); S14(Phospho)	S(4): 100.0; S(14): 100.0	0	1.323e-08
O14497	SHHAPMSPGSSGGGGQPLAR	S7(Phospho)	S(1): 0.0; S(7): 100.0; S(10): 0.0; S(11): 0.0	0	1.325e-08
P05114	TEESPASDEAGEKEAK	S4(Phospho); S7(Phospho)	T(1): 0.0; S(4): 100.0; S(7): 100.0	0	1.327e-08
H3BM18	VSEEQTQPPSPAGAGMSTAMGR	S10(Phospho)	S(2): 0.0; T(6): 0.0; S(10): 100.0; S(17): 0.0; T(18): 0.0	0	1.327e-08
A0A075B797	ALSGTSPDDVQPGPSVGPPSK	S6(Phospho)	S(3): 0.3; T(5): 5.2; S(6): 94.5; S(15): 0.0; S(20): 0.0	0	1.331e-08
A0PJD3	TNSAEVTPPVLSVMGEATPVSIEPR	T7(Phospho); T18(Phospho)	T(1): 0.3; S(3): 0.3; T(7): 99.3; S(12): 0.0; T(18): 100.0; S(21): 0.0	0	1.333e-08
Q5VVD7	NGSPSLGRDSPDTMLASPQEEGEGPSSTTESSER	S5(Phospho)	S(3): 0.1; S(5): 91.9; S(10): 7.4; T(13): 0.6; S(17): 0.0; S(26): 0.0; S(27): 0.0; T(28): 0.0; T(29): 0.0; S(31): 0.0; S(32): 0.0	0	1.335e-08
Q15454	HTDDEMTGYVATR	T7(Phospho); Y9(Phospho)	T(2): 0.0; T(7): 100.0; Y(9): 100.0; T(12): 0.0	0	1.34e-08
O95425	YGSFEEAEASYPILNR	S3(Phospho)	Y(1): 3.1; S(3): 96.9; S(10): 0.0; Y(11): 0.0	0	1.341e-08
Q8IVF2	DAHDVSPTSTDTEAQLTVER	S6(Phospho)	S(6): 100.0; T(8): 0.0; S(9): 0.0; T(10): 0.0; T(12): 0.0; T(17): 0.0	0	1.342e-08
Q9Y5S2	HSTPSNSSNPSGPPSPNSPHR	S15(Phospho); S18(Phospho)	S(2): 0.0; T(3): 0.0; S(5): 0.0; S(7): 0.0; S(8): 0.0; S(11): 0.0; S(15): 100.0; S(18): 100.0	0	1.351e-08
H3BU45	TPQPGSPSPNTPCLPEAAVSQPGSAVASDWR	S6(Phospho); C13(Carbamidomethyl)	T(1): 7.4; S(6): 84.4; S(8): 0.7; T(11): 7.4; S(20): 0.0; S(24): 0.0; S(28): 0.0	0	1.353e-08
Q32MZ4	NMPGLSAATLASLGGTSSR	S18(Phospho)	S(6): 0.0; T(9): 0.0; S(12): 0.0; T(16): 49.1; S(17): 1.8; S(18): 49.1	0	1.355e-08
A0A087WUB0	TPSSSSTLAYSPR	S3(Phospho)	T(1): 0.0; S(3): 96.4; S(4): 3.6; S(5): 0.0; S(6): 0.0; T(7): 0.0; Y(10): 0.0; S(11): 0.0	0	1.361e-08
Q5W9G0	KNSITEISDNEDDLLEYHR	S3(Phospho); T5(Phospho)	S(3): 99.9; T(5): 50.1; S(8): 50.1; Y(17): 0.0	0	1.362e-08
Q5HYD4	IACEEEFSDSEEEGEGGR	C3(Carbamidomethyl); S8(Phospho); S10(Phospho)	S(8): 100.0; S(10): 100.0	0	1.363e-08
F8W7U3	HTTQMSDEEEDDDGCDLFADSEKEEEDIEDIEENTRPK	S6(Phospho); C15(Carbamidomethyl); S21(Phospho)	T(2): 0.0; T(3): 1.1; S(6): 98.9; S(21): 100.0; T(35): 0.0	0	1.37e-08
B3KNQ9	VEEASPGRPSSVDTLLSPTALIDSILR	S5(Phospho)	S(5): 100.0; S(10): 0.0; S(11): 0.0; T(14): 0.0; S(17): 0.0; T(19): 0.0; S(24): 0.0	0	1.372e-08
P08238	EISDDEAEEEKGEK	S3(Phospho)	S(3): 100.0	0	1.373e-08
Q8TBB5	SEDEDSLEEAGSPAPGPCPR	S1(Phospho); S6(Phospho); C18(Carbamidomethyl)	S(1): 100.0; S(6): 100.0; S(12): 0.0	0	1.383e-08
A2AB27	REEQTDTSDGESVTHHIR	S8(Phospho)	T(5): 0.0; T(7): 0.0; S(8): 100.0; S(12): 0.0; T(14): 0.0	0	1.388e-08
Q4LE79	GGGGYTCQSGSGWDEFTK	C7(Carbamidomethyl); S9(Phospho)	Y(5): 0.0; T(6): 0.0; S(9): 50.0; S(11): 50.0; T(17): 0.0	0	1.394e-08
B3KUR4	GGPTSHPSPVPPPASSPSPLSGSALCGGK	S16(Phospho); C26(Carbamidomethyl)	T(4): 0.0; S(5): 0.0; S(8): 0.0; S(15): 0.3; S(16): 99.7; S(18): 0.0; S(21): 0.0; S(23): 0.0	0	1.396e-08
Q9NW22	GKEELAEAEIIKDSPDSPEPPNK	S17(Phospho)	S(14): 0.0; S(17): 100.0	0	1.396e-08
B4DP70	DNTRPGANSPEMWSEAIK	S9(Phospho)	T(3): 0.0; S(9): 100.0; S(14): 0.0	0	1.402e-08
Q8NFC6	RTSTPVIMEGVQEETDTR	T2(Phospho)	T(2): 49.3; S(3): 49.3; T(4): 1.4; T(15): 0.0; T(17): 0.0	0	1.403e-08
Q12888	LSDVDANTAIKHEEQSNEDIPIAEQSSK	S16(Phospho)	S(2): 0.0; T(8): 0.0; S(16): 100.0; S(26): 0.0; S(27): 0.0	0	1.404e-08
H3BU99	DKDQPPSPSPPPQSEALSSTSR	S7(Phospho); S9(Phospho)	S(7): 100.0; S(9): 100.0; S(14): 0.0; S(18): 0.0; S(19): 0.0; T(20): 0.0; S(21): 0.0	0	1.41e-08
Q15527	KDLGSTEDGDGTDDFLTDKEDEK	T12(Phospho); T17(Phospho)	S(5): 0.0; T(6): 0.0; T(12): 100.0; T(17): 100.0	0	1.41e-08
O75592	VNSGDTEVGSSLLR	S3(Phospho)	S(3): 100.0; T(6): 0.0; S(10): 0.0; S(11): 0.0	0	1.423e-08
Q53FE8	VTSFRDLIHDQDEDEEEEEGQR	S3(Phospho)	T(2): 4.9; S(3): 95.1	0	1.423e-08
A0A087WVF1	RDSSESQLASTESDKPTTGR	S3(Phospho)	S(3): 99.9; S(4): 0.1; S(6): 0.0; S(10): 0.0; T(11): 0.0; S(13): 0.0; T(17): 0.0; T(18): 0.0	0	1.428e-08
B7Z8D3	ITSEAEDLVANFFPK	S3(Phospho)	T(2): 0.0; S(3): 100.0	0	1.435e-08
Q8WXE0	SHSLSRPGPTEGDAEGEAEGPVGSTLGSYATLTR	S3(Phospho)	S(1): 7.2; S(3): 92.8; S(5): 0.0; T(10): 0.0; S(24): 0.0; T(25): 0.0; S(28): 0.0; Y(29): 0.0; T(31): 0.0; T(33): 0.0	0	1.436e-08
A1A5C9	KGSISSTQDTPVAVEEDCSLASSK	S3(Phospho); C18(Carbamidomethyl)	S(3): 95.8; S(5): 4.2; S(6): 0.0; T(7): 0.0; T(10): 0.0; S(19): 0.0; S(22): 0.0; S(23): 0.0	0	1.442e-08
Q56NI9	SKSEVIEDSDVETVSEK	S9(Phospho)	S(1): 0.0; S(3): 0.0; S(9): 99.9; T(13): 0.1; S(15): 0.0	0	1.447e-08
Q8IX90	NSVHEQEAINSDPELSNCENFQK	S11(Phospho); C18(Carbamidomethyl)	S(2): 0.0; S(11): 100.0; S(16): 0.0	0	1.448e-08
Q53SF7	SMSVDETDKSPCEAGR	S3(Phospho); C12(Carbamidomethyl)	S(1): 0.0; S(3): 100.0; T(7): 0.0; S(10): 0.0	0	1.453e-08
Q8TDM6	RPQTPPKIDYLLPGPGPAHSPQPSKR	T4(Phospho); S20(Phospho)	T(4): 100.0; Y(10): 0.0; S(20): 99.9; S(24): 0.1	0	1.463e-08
H0YLF2	SYSFEASEEDLDVDDKVEELMR	S3(Phospho)	S(1): 0.0; Y(2): 0.0; S(3): 100.0; S(7): 0.0	0	1.464e-08
Q9UK76	MASNIFGTPEENQASWAK	T8(Phospho)	S(3): 0.0; T(8): 100.0; S(15): 0.0	0	1.466e-08
B4DJ71	NNSYTCYTAAICGLPVHATFR	S3(Phospho); C6(Carbamidomethyl); C12(Carbamidomethyl)	S(3): 99.7; Y(4): 0.3; T(5): 0.0; Y(7): 0.0; T(8): 0.0; T(19): 0.0	0	1.467e-08
Q8WWM7	EVDGLLTSEPMGSPVSSK	S13(Phospho)	T(7): 0.0; S(8): 0.0; S(13): 2.9; S(16): 94.1; S(17): 2.9	0	1.481e-08
B2RNT9	TVSQQSFDGVSLDSSGPEDR	S3(Phospho); S6(Phospho)	T(1): 0.0; S(3): 100.0; S(6): 100.0; S(11): 0.0; S(14): 0.0; S(15): 0.0	0	1.496e-08
H0YE35	GLMAGGRPEGQYSEDEDTDTDEYKEAK	S13(Phospho); T18(Phospho)	Y(12): 6.2; S(13): 93.8; T(18): 100.0; T(20): 0.0; Y(23): 0.0	0	1.498e-08
R4GMM6	QRSDDESPSTSSGSSDADQR	S3(Phospho)	S(3): 50.0; S(7): 50.0; S(9): 0.0; T(10): 0.0; S(11): 0.0; S(12): 0.0; S(14): 0.0; S(15): 0.0	0	1.502e-08
Q8WWM7	GPPQSPVFEGVYNNSR	S5(Phospho)	S(5): 100.0; Y(12): 0.0; S(15): 0.0	0	1.524e-08
B4DFG0	EESEEEEDEDDEEEEEEEKEK	S3(Phospho)	S(3): 100.0	0	1.528e-08
Q09666	GKGGVTGSPEASISGSK	S8(Phospho)	T(6): 0.0; S(8): 100.0; S(12): 0.0; S(14): 0.0; S(16): 0.0	0	1.528e-08
B7Z255	NSVDTATSSSLSTPSEPLSPTSSLGEER	S19(Phospho)	S(2): 0.0; T(5): 0.0; T(7): 0.0; S(8): 0.0; S(9): 0.0; S(10): 0.0; S(12): 0.0; T(13): 0.0; S(15): 0.0; S(19): 100.0; T(21): 0.0; S(22): 0.0; S(23): 0.0	0	1.536e-08
E9PFK5	FGEYNSNMSPEEK	S9(Phospho)	Y(4): 0.0; S(6): 0.0; S(9): 100.0	0	1.537e-08
Q7Z2K8	SPSGAGEGASCSDGPR	S3(Phospho); C11(Carbamidomethyl)	S(1): 0.0; S(3): 100.0; S(10): 0.0; S(12): 0.0	0	1.538e-08
Q9UKS6	EKGGRSPDEVTLTSIVPTR	S6(Phospho)	S(6): 100.0; T(11): 0.0; T(13): 0.0; S(14): 0.0; T(18): 0.0	0	1.539e-08
Q8TEU7	SLSQGSTNSNMLDVQGGAHK	S3(Phospho)	S(1): 4.5; S(3): 95.5; S(6): 0.0; T(7): 0.0; S(9): 0.0	0	1.543e-08
Q7KYM9	GNFGGSFAGSFGGAGGHAPGVAR	S6(Phospho)	S(6): 100.0; S(10): 0.0	0	1.548e-08
Q9Y266	NGSLDSPGKQDTEEDEEEDEKDK	S6(Phospho); T12(Phospho)	S(3): 0.5; S(6): 99.5; T(12): 100.0	0	1.552e-08
Q9UPT8	TGSGSPFAGNSPAR	S5(Phospho)	T(1): 0.0; S(3): 0.0; S(5): 100.0; S(11): 0.0	0	1.558e-08
Q5TH58	KVEGNFNPFASPQK	S11(Phospho)	S(11): 100.0	0	1.562e-08
Q4LE74	SPLEHSSPEKEAPSPEK	S7(Phospho)	S(1): 0.0; S(6): 0.0; S(7): 100.0; S(14): 0.0	0	1.562e-08
Q5H924	ACSPCSSQSSSSGICTDFWDLLVK	C2(Carbamidomethyl); S3(Phospho); C5(Carbamidomethyl); C15(Carbamidomethyl)	S(3): 100.0; S(6): 0.0; S(7): 0.0; S(9): 0.0; S(10): 0.0; S(11): 0.0; S(12): 0.0; T(16): 0.0	0	1.567e-08
P35251	IIYDSDSESEETLQVK	S5(Phospho); S7(Phospho)	Y(3): 0.0; S(5): 100.0; S(7): 100.0; S(9): 0.0; T(12): 0.0	0	1.57e-08
O15085	QPSDASETTGLVQR	S3(Phospho)	S(3): 100.0; S(6): 0.0; T(8): 0.0; T(9): 0.0	0	1.578e-08
A8K5Q1	CAPSAGSPAAAVGRESPGAAATSSSGPQAQQHR	C1(Carbamidomethyl); S7(Phospho); S16(Phospho)	S(4): 0.1; S(7): 99.9; S(16): 100.0; T(22): 0.0; S(23): 0.0; S(24): 0.0; S(25): 0.0	0	1.579e-08
Q9UK76	RNSSEASSGDFLDLK	S3(Phospho)	S(3): 50.0; S(4): 50.0; S(7): 0.0; S(8): 0.0	0	1.579e-08
Q12802	RAETFGGFDSHQMNASK	T4(Phospho)	T(4): 100.0; S(10): 0.0; S(16): 0.0	0	1.587e-08
Q9C0C2	VPSSDEEVVEEPQSR	S3(Phospho); S4(Phospho)	S(3): 100.0; S(4): 100.0; S(14): 0.0	0	1.592e-08
Q8WU40	GSTESCNTTTEDEDLKVR	S5(Phospho); C6(Carbamidomethyl)	S(2): 0.0; T(3): 4.0; S(5): 96.0; T(8): 0.0; T(9): 0.0; T(10): 0.0	0	1.594e-08
I3VM54	YEDDGISDDEIEGK	S7(Phospho)	Y(1): 0.0; S(7): 100.0	0	1.594e-08
B7Z310	SMSAAFCSLLAPER	S3(Phospho); C7(Carbamidomethyl)	S(1): 0.0; S(3): 100.0; S(8): 0.0	0	1.596e-08
P22314	RVSGPDPKPGSNCSPAQSVLSEVPSVPTNGMAK	S3(Phospho); C13(Carbamidomethyl)	S(3): 100.0; S(11): 0.0; S(14): 0.0; S(18): 0.0; S(21): 0.0; S(25): 0.0; T(28): 0.0	0	1.597e-08
C9J0I9	SMGTGDTPGLEVPSSPLR	S14(Phospho)	S(1): 0.0; T(4): 0.0; T(7): 0.0; S(14): 96.9; S(15): 3.1	0	1.6e-08
C9J494	KTQPSMVSNPGSCSDPQPSPEMKPHSYLDAIR	C13(Carbamidomethyl); S19(Phospho)	T(2): 0.0; S(5): 0.0; S(8): 0.0; S(12): 0.0; S(14): 0.0; S(19): 100.0; S(26): 0.0; Y(27): 0.0	0	1.602e-08
B1AMX5	ADDFPVRDDPSDVTDEDEGPAEPPPPPK	S11(Phospho); T14(Phospho)	S(11): 100.0; T(14): 100.0	0	1.605e-08
K7EQA4	SPLTAASPGELPTEGAGPDVVEDISHLLADVAR	S7(Phospho)	S(1): 0.0; T(4): 1.2; S(7): 98.8; T(13): 0.0; S(25): 0.0	0	1.605e-08
Q99549	GLWSTDSAEEDKETK	S7(Phospho)	S(4): 0.0; T(5): 0.0; S(7): 100.0; T(14): 0.0	0	1.607e-08
P51397	EEKDKDDQEWESPSPPKPTVFISGVIAR	S14(Phospho)	S(12): 0.0; S(14): 100.0; T(19): 0.0; S(23): 0.0	0	1.615e-08
Q6PKG0	NTFTAWSDEESDYEIDDR	S7(Phospho); S11(Phospho)	T(2): 0.0; T(4): 0.0; S(7): 100.0; S(11): 99.7; Y(13): 0.3	0	1.615e-08
Q9NY61	AGDRNSEDDGVVMTFSSVK	S6(Phospho)	S(6): 100.0; T(14): 0.0; S(16): 0.0; S(17): 0.0	0	1.619e-08
O60293	TSSSSPANSDVEIDGIGR	S5(Phospho)	T(1): 4.5; S(2): 4.5; S(3): 86.2; S(4): 0.3; S(5): 4.5; S(9): 0.0	0	1.62e-08
Q14160	RSEACPCQPDSGSPLPAEEEK	C5(Carbamidomethyl); C7(Carbamidomethyl); S13(Phospho)	S(2): 0.0; S(11): 0.0; S(13): 100.0	0	1.623e-08
B5BTY4	QSSGASSSSFSSSR	S9(Phospho)	S(2): 0.0; S(3): 0.0; S(6): 0.0; S(7): 0.1; S(8): 3.2; S(9): 93.4; S(11): 3.2; S(12): 0.1; S(13): 0.0	0	1.626e-08
Q9P265	SSLMDTADGVPVSSR	S2(Phospho)	S(1): 4.3; S(2): 95.7; T(6): 0.0; S(13): 0.0; S(14): 0.0	0	1.631e-08
B8ZZ93	RGSTSGAMEAPEPGEALELSLAGAHGHGVHK	S3(Phospho)	S(3): 99.6; T(4): 0.4; S(5): 0.0; S(20): 0.0	0	1.632e-08
P25490	KDIDHETVVEEQIIGENSPPDYSEYMTGK	S18(Phospho)	T(7): 0.0; S(18): 100.0; Y(22): 0.0; S(23): 0.0; Y(25): 0.0; T(27): 0.0	0	1.636e-08
Q9H3Q1	AGPDLPSLPSHALEDEGWAAAAPSPGSAR	S24(Phospho)	S(7): 0.0; S(10): 0.0; S(24): 50.0; S(27): 50.0	0	1.638e-08
Q12846	AIEPQKEEADENYNSVNTR	S15(Phospho)	Y(13): 0.0; S(15): 100.0; T(18): 0.0	0	1.643e-08
E9PGM9	EGETQGVAFEHESPADFQNSQSPVQDQDK	S22(Phospho)	T(4): 0.0; S(13): 0.0; S(20): 0.3; S(22): 99.7	0	1.647e-08
P51116	AGYSTDESSSSSLHATR	T5(Phospho)	Y(3): 0.0; S(4): 0.0; T(5): 100.0; S(8): 0.0; S(9): 0.0; S(10): 0.0; S(11): 0.0; S(12): 0.0; T(16): 0.0	0	1.654e-08
Q5JTV8	GLRDSHSSEEDEASSQTDLSQTISK	S5(Phospho); S7(Phospho)	S(5): 99.8; S(7): 50.1; S(8): 50.1; S(14): 0.0; S(15): 0.0; T(17): 0.0; S(20): 0.0; T(22): 0.0; S(24): 0.0	0	1.668e-08
C9JWF0	RREEGPPPPSPDGASSDAEPEPPSGR	S15(Phospho)	S(10): 0.0; S(15): 95.4; S(16): 4.6; S(24): 0.0	0	1.668e-08
O95218	YNLDASEEEDSNK	S6(Phospho)	Y(1): 0.0; S(6): 100.0; S(11): 0.0	0	1.681e-08
F8WEJ1	VGSPSGDAASSTPPSTR	S3(Phospho)	S(3): 100.0; S(5): 0.0; S(10): 0.0; S(11): 0.0; T(12): 0.0; S(15): 0.0; T(16): 0.0	0	1.684e-08
O15047	RRSSSDTAAYPAGTTAVGTPGNGTPCSQDTSFSSSR	S5(Phospho); C26(Carbamidomethyl)	S(3): 32.4; S(4): 32.4; S(5): 32.4; T(7): 2.7; Y(10): 0.0; T(14): 0.0; T(15): 0.0; T(19): 0.0; T(24): 0.0; S(27): 0.0; T(30): 0.0; S(31): 0.0; S(33): 0.0; S(34): 0.0; S(35): 0.0	0	1.687e-08
O00418	KYESDEDSLGSSGR	S8(Phospho)	Y(2): 0.0; S(4): 0.0; S(8): 100.0; S(11): 0.0; S(12): 0.0	0	1.693e-08
I3L436	VLDTSSLTQSAPASPTNK	S10(Phospho); S14(Phospho)	T(4): 0.0; S(5): 0.0; S(6): 0.0; T(8): 0.0; S(10): 100.0; S(14): 99.9; T(16): 0.1	0	1.695e-08
Q6NUR1	TLHCEGTEINSDDEQESKEVEETATAK	C4(Carbamidomethyl); S11(Phospho)	T(1): 0.0; T(7): 0.0; S(11): 100.0; S(17): 0.0; T(23): 0.0; T(25): 0.0	0	1.698e-08
Q99856	AAAAGLGHPASPGGSEDGPPGSEEEDAAR	S11(Phospho); S15(Phospho)	S(11): 100.0; S(15): 100.0; S(22): 0.0	0	1.699e-08
B4DS13	YAALSVDGEDENEGEDYAE	S5(Phospho)	Y(1): 0.1; S(5): 99.9; Y(17): 0.0	0	1.699e-08
Q9BUA3	NLDPDPEPPSPDSPTETFAAPAEVR	S13(Phospho)	S(10): 0.0; S(13): 50.0; T(15): 50.0; T(17): 0.0	0	1.703e-08
E9PK01	KPATPAEDDEDDDIDLFGSDNEEEDKEAAQLR	T4(Phospho); S19(Phospho)	T(4): 100.0; S(19): 100.0	0	1.704e-08
P49756	QEPESEEEEEEKQEK	S5(Phospho)	S(5): 100.0	0	1.707e-08
B3KSQ7	MAPTPIPTRSPSDSSTASTPVAEQIER	S10(Phospho)	T(4): 0.0; T(8): 5.8; S(10): 93.8; S(12): 0.4; S(14): 0.0; S(15): 0.0; T(16): 0.0; S(18): 0.0; T(19): 0.0	0	1.708e-08
Q9NRY4	NIIEATHMYDNAAEACSTTEEVFNSPR	C16(Carbamidomethyl); S25(Phospho)	T(6): 0.0; Y(9): 0.0; S(17): 0.0; T(18): 0.0; T(19): 0.0; S(25): 100.0	0	1.715e-08
O00418	ESENSGDSGYPSEK	S12(Phospho)	S(2): 0.0; S(5): 0.0; S(8): 0.0; Y(10): 2.9; S(12): 97.1	0	1.726e-08
Q00653	DKLPSTAEVKEDSAYGSQSVEQEAEK	S5(Phospho)	S(5): 50.0; T(6): 50.0; S(13): 0.0; Y(15): 0.0; S(17): 0.0; S(19): 0.0	0	1.729e-08
B3KR49	IADPEHDHTGFLTEYVATR	Y15(Phospho)	T(9): 0.0; T(13): 0.0; Y(15): 99.9; T(18): 0.1	0	1.737e-08
Q9Y5B6	MADHLEGLSSDDEETSTDITNFNLEKDR	S9(Phospho); S10(Phospho)	S(9): 100.0; S(10): 100.0; T(15): 0.0; S(16): 0.0; T(17): 0.0; T(20): 0.0	0	1.75e-08
B4E302	ASYHFSPEELDENTSPLLGDAR	S15(Phospho)	S(2): 0.0; Y(3): 0.0; S(6): 0.0; T(14): 0.0; S(15): 100.0	0	1.751e-08
Q96BZ8	HQNSLPELEAAEAGAPGSGPVDLFR	S4(Phospho)	S(4): 100.0; S(18): 0.0	0	1.751e-08
O94806	TISPSTSNNIPLMR	S3(Phospho)	T(1): 0.0; S(3): 100.0; S(5): 0.0; T(6): 0.0; S(7): 0.0	0	1.752e-08
P07900	DKEVSDDEAEEKEDK	S5(Phospho)	S(5): 100.0	0	1.761e-08
P27816	KCSLPAEEDSVLEK	C2(Carbamidomethyl); S3(Phospho)	S(3): 100.0; S(10): 0.0	0	1.766e-08
Q9NYL2	DSGFSSGNTDTSSER	S12(Phospho)	S(2): 0.0; S(5): 0.0; S(6): 0.0; T(9): 0.0; T(11): 0.2; S(12): 96.1; S(13): 3.7	0	1.779e-08
P02545	ASSHSSQTQGGGSVTKK	S3(Phospho)	S(2): 0.2; S(3): 99.8; S(5): 0.0; S(6): 0.0; T(8): 0.0; S(13): 0.0; T(15): 0.0	0	1.783e-08
P06748	TVSLGAGAKDELHIVEAEAMNYEGSPIKVTLATLK	S25(Phospho)	T(1): 0.0; S(3): 0.0; Y(22): 0.0; S(25): 100.0; T(30): 0.0; T(33): 0.0	0	1.789e-08
Q12888	SATVKPGAVGAGEFVSPCESGDNTGEPSALEEQR	S16(Phospho); C18(Carbamidomethyl)	S(1): 0.0; T(3): 0.0; S(16): 100.0; S(20): 0.0; T(24): 0.0; S(28): 0.0	0	1.79e-08
Q9BY89	VHSEAISPAPEEK	S7(Phospho)	S(3): 0.0; S(7): 100.0	0	1.791e-08
Q8TF01	SKFDSDEEEEDTENVEAASSGK	S5(Phospho)	S(1): 0.0; S(5): 100.0; T(12): 0.0; S(19): 0.0; S(20): 0.0	0	1.794e-08
Q9Y4F5	APGPRDTDDDEEEPDPYGFIVQTAEIAEIAR	T7(Phospho)	T(7): 100.0; Y(17): 0.0; T(23): 0.0	0	1.8e-08
O75128	GCLTTPNSPSMHSR	C2(Carbamidomethyl); S8(Phospho)	T(4): 0.0; T(5): 0.0; S(8): 99.9; S(10): 0.1; S(13): 0.0	0	1.808e-08
P12270	EGVQGPLNVSLSEEGK	S10(Phospho)	S(10): 99.9; S(12): 0.1	0	1.809e-08
C9JGM9	QHSPIQVPMVAGSPLGATQTCNK	S13(Phospho); C21(Carbamidomethyl)	S(3): 0.0; S(13): 100.0; T(18): 0.0; T(20): 0.0	0	1.817e-08
B4DZH5	GGTTSWGTSGQPSPSYDSSR	S13(Phospho)	T(3): 0.0; T(4): 0.0; S(5): 0.0; T(8): 0.0; S(9): 0.0; S(13): 100.0; S(15): 0.0; Y(16): 0.0; S(18): 0.0; S(19): 0.0	0	1.833e-08
J3KP58	ATSPLCTSTASMVSSSPSTPSNIPQKPSQPAAK	T2(Phospho); C6(Carbamidomethyl)	T(2): 92.5; S(3): 7.5; T(7): 0.0; S(8): 0.0; T(9): 0.0; S(11): 0.0; S(14): 0.0; S(15): 0.0; S(16): 0.0; S(18): 0.0; T(19): 0.0; S(21): 0.0; S(28): 0.0	0	1.835e-08
Q9UFC0	ANSPEKPPEAGAAHKPR	S3(Phospho)	S(3): 100.0	0	1.836e-08
Q92610	HGLTSGSASPPPPALPLYPDPVR	S5(Phospho)	T(4): 1.6; S(5): 48.4; S(7): 48.4; S(9): 1.6; Y(18): 0.0	0	1.839e-08
B4DMV9	DKPTYDEIFYTLSPVNGK	S13(Phospho)	T(4): 0.0; Y(5): 0.0; Y(10): 0.0; T(11): 0.0; S(13): 100.0	0	1.847e-08
Q96ST2	AAVLSDSEDEEKASAK	S5(Phospho); S7(Phospho)	S(5): 100.0; S(7): 100.0; S(14): 0.0	0	1.853e-08
A0PJD3	SHESNAPGSAGGQASEKPR	S9(Phospho)	S(1): 0.0; S(4): 0.0; S(9): 100.0; S(15): 0.0	0	1.853e-08
Q15699	TSPCQDSSVNYGITK	S2(Phospho); C4(Carbamidomethyl)	T(1): 50.0; S(2): 50.0; S(7): 0.0; S(8): 0.0; Y(11): 0.0; T(14): 0.0	0	1.857e-08
P51532	KAENAEGQTPAIGPDGEPLDETSQMSDLPVK	S26(Phospho)	T(9): 0.0; T(22): 0.4; S(23): 0.4; S(26): 99.3	0	1.864e-08
Q7Z4V5	GRGPPSSSDSEPEAELER	S6(Phospho); S7(Phospho); S8(Phospho); S10(Phospho)	S(6): 100.0; S(7): 100.0; S(8): 100.0; S(10): 100.0	0	1.867e-08
P18583	SHDDGNIDLESDSFLKFDSEPSAVALELPTR	S11(Phospho)	S(1): 0.0; S(11): 92.7; S(13): 7.3; S(19): 0.0; S(22): 0.0; T(30): 0.0	0	1.868e-08
Q8WWQ0	VLSDSEDEEKDADVPGTSTR	S3(Phospho); S5(Phospho)	S(3): 100.0; S(5): 100.0; T(17): 0.0; S(18): 0.0; T(19): 0.0	0	1.875e-08
Q9Y2U5	DRSSPPPGYIPDELHQVAR	S4(Phospho)	S(3): 50.0; S(4): 50.0; Y(9): 0.0	0	1.88e-08
Q92766	AATTATPAATTSPK	S12(Phospho)	T(3): 0.0; T(4): 0.0; T(6): 0.0; T(10): 33.3; T(11): 33.3; S(12): 33.3	0	1.885e-08
Q15365	CSDAAGYPHATHDLEGPPLDAYSIQGQHTISPLDLAK	C1(Carbamidomethyl); S31(Phospho)	S(2): 0.0; Y(7): 0.0; T(11): 0.0; Y(22): 0.0; S(23): 0.0; T(29): 0.1; S(31): 99.9	0	1.903e-08
Q15714	KLSTTGSSDSITPVAPTSAVSSSGSPASVMTNMR	T12(Phospho)	S(3): 0.7; T(4): 0.7; T(5): 0.7; S(7): 7.0; S(8): 7.0; S(10): 77.0; T(12): 7.0; T(17): 0.0; S(18): 0.0; S(21): 0.0; S(22): 0.0; S(23): 0.0; S(25): 0.0; S(28): 0.0; T(31): 0.0	0	1.906e-08
A0A024R3J3	QLSADSAEAHSLNVNR	S3(Phospho)	S(3): 100.0; S(6): 0.0; S(11): 0.0	0	1.912e-08
P61006	KLEGNSPQGSNQGVK	S10(Phospho)	S(6): 0.0; S(10): 100.0	0	1.914e-08
B3KW08	HSVTAATPPPSPTSGESGDLLSNLLQSPSSAK	T7(Phospho); S11(Phospho)	S(2): 1.1; T(4): 98.8; T(7): 9.2; S(11): 88.9; T(13): 1.0; S(14): 1.0; S(17): 0.1; S(22): 0.0; S(27): 0.0; S(29): 0.0; S(30): 0.0	0	1.915e-08
K7EN42	EKGSETDSAQDQPVK	S4(Phospho)	S(4): 100.0; T(6): 0.0; S(8): 0.0	0	1.94e-08
H7C3A2	RRTSDPSAAVNHVSSTTSLGENYEDDDLVNSDEVMK	T3(Phospho)	T(3): 50.0; S(4): 50.0; S(7): 0.0; S(14): 0.0; S(15): 0.0; T(16): 0.0; T(17): 0.0; S(18): 0.0; Y(23): 0.0; S(31): 0.0	0	1.944e-08
Q12888	MVIQGPSSPQGEAMVTDVLEDQK	S8(Phospho)	S(7): 4.5; S(8): 95.5; T(16): 0.0	0	1.945e-08
Q9Y4E8	GASAATGIPLESDEDSNDNDNDIENENCMHTN	S16(Phospho); C28(Carbamidomethyl)	S(3): 0.0; T(6): 0.0; S(12): 9.6; S(16): 90.4; T(31): 0.0	0	1.947e-08
Q9ULH0	TPSTVTLNNNSAPANR	S3(Phospho)	T(1): 4.1; S(3): 91.7; T(4): 4.1; T(6): 0.0; S(11): 0.0	0	1.95e-08
D6W5C0	VSEEAESQQQWDTSKGEQVSQNGLPAEQGSPR	S30(Phospho)	S(2): 0.0; S(7): 0.0; T(13): 0.0; S(14): 0.0; S(20): 0.0; S(30): 100.0	0	1.99e-08
Q14677	ASPDQNASTHTPQSSVK	T11(Phospho)	S(2): 0.0; S(8): 2.3; T(9): 48.8; T(11): 48.8; S(14): 0.0; S(15): 0.0	0	1.992e-08
B4DU91	GSLAEAVGSPPPAATPTPTPPTR	S9(Phospho)	S(2): 0.0; S(9): 100.0; T(15): 0.0; T(17): 0.0; T(19): 0.0; T(22): 0.0	0	1.993e-08
Q59GK6	NATLAWDSSHSSIQNSPK	S16(Phospho)	T(3): 0.0; S(8): 0.0; S(9): 0.0; S(11): 0.0; S(12): 0.0; S(16): 100.0	0	1.993e-08
A0A024QZ54	ARQEEGADASEEDPTPAGEEDVKDAR	S10(Phospho)	S(10): 100.0; T(15): 0.0	0	1.996e-08
B4E1E0	SGSSSPDSEITELKFPSINHD	S4(Phospho)	S(1): 2.8; S(3): 2.8; S(4): 47.2; S(5): 47.2; S(8): 0.0; T(11): 0.0; S(17): 0.0	0	1.997e-08
B4DYY5	NPSDSAVHSPFTK	S9(Phospho)	S(3): 0.0; S(5): 0.0; S(9): 100.0; T(12): 0.0	0	2.002e-08
Q13136	NSTGSQDGPVSNPSSSNSSQDSLHK	S19(Phospho)	S(2): 0.0; T(3): 0.0; S(5): 0.0; S(11): 0.0; S(14): 0.0; S(15): 0.0; S(16): 0.0; S(18): 33.3; S(19): 33.3; S(22): 33.3	0	2.004e-08
Q9Y2X9	SPGLGGGEGGSHGVIQDLSILHQHVQQQPAQHHR	S1(Phospho)	S(1): 100.0; S(11): 0.0; S(19): 0.0	0	2.007e-08
E7ESG2	VLQDSDSETEDTNASPEK	S5(Phospho); S7(Phospho)	S(5): 100.0; S(7): 95.1; T(9): 4.9; T(12): 0.0; S(15): 0.0	0	2.009e-08
A0A024R6Q8	DGTDTSQSGEDGGCWQR	S6(Phospho); C14(Carbamidomethyl)	T(3): 0.0; T(5): 0.0; S(6): 100.0; S(8): 0.0	0	2.017e-08
Q53SY7	VLGTSPEAIDSAENR	S5(Phospho)	T(4): 0.0; S(5): 100.0; S(11): 0.0	0	2.022e-08
E9PGG1	EAEALLQSMGLTPESPIVPPPMSPSSK	S23(Phospho)	S(8): 0.0; T(12): 0.0; S(15): 0.0; S(23): 3.9; S(25): 3.9; S(26): 92.2	0	2.024e-08
P48634	SETPPVPPPPPYLASYPGFPENGAPGPPISR	S1(Phospho)	S(1): 50.0; T(3): 50.0; Y(12): 0.0; S(15): 0.0; Y(16): 0.0; S(30): 0.0	0	2.028e-08
Q8N573	VVSSTSEEEEAFTEK	S3(Phospho)	S(3): 100.0; S(4): 0.0; T(5): 0.0; S(6): 0.0; T(13): 0.0	0	2.033e-08
O14686	VSPAAAQLADTLFSK	S2(Phospho)	S(2): 100.0; T(11): 0.0; S(14): 0.0	0	2.04e-08
B3KT40	KDSLTQAQEQGNLLN	S3(Phospho)	S(3): 100.0; T(5): 0.0	0	2.048e-08
Q9BXB4	VSESEGKLEGQATAVTPNK	S4(Phospho)	S(2): 3.7; S(4): 96.3; T(13): 0.0; T(16): 0.0	0	2.052e-08
H3BPE1	QGSFSEDVISHK	S3(Phospho)	S(3): 100.0; S(5): 0.0; S(10): 0.0	0	2.071e-08
A0A024RAI5	VNHEPEPAGGATPGATLPKSPSQLR	S20(Phospho)	T(12): 0.0; T(16): 0.0; S(20): 50.0; S(22): 50.0	0	2.071e-08
Q13428	TSQVGAASAPAKESPR	S14(Phospho)	T(1): 0.0; S(2): 0.0; S(8): 0.0; S(14): 100.0	0	2.096e-08
B8ZZ93	AWLDEDSNLSPSPLR	S7(Phospho)	S(7): 100.0; S(10): 0.0; S(12): 0.0	0	2.1e-08
P55081	RPDYAPMESSDEEDEEFQFIKK	S9(Phospho); S10(Phospho)	Y(4): 0.0; S(9): 100.0; S(10): 100.0	0	2.104e-08
F5H478	NVLSSLAVYAEDSEPESDGEAGIEAVGSAAEEK	S13(Phospho); S17(Phospho)	S(4): 0.0; S(5): 0.0; Y(9): 1.0; S(13): 99.0; S(17): 100.0; S(28): 0.0	0	2.111e-08
P18858	GQKPALDCSQVSPPRPATSPENNASLSDTSPMDSSPSGIPK	C8(Carbamidomethyl); S12(Phospho); T18(Phospho)	S(9): 12.8; S(12): 87.0; T(18): 0.1; S(19): 0.1; S(25): 0.0; S(27): 0.3; T(29): 12.3; S(30): 83.6; S(34): 1.9; S(35): 1.9; S(37): 0.0	0	2.122e-08
F8VWH9	SPSSDSWTCADTSTER	S1(Phospho); C9(Carbamidomethyl)	S(1): 99.9; S(3): 0.1; S(4): 0.0; S(6): 0.0; T(8): 0.0; T(12): 0.0; S(13): 0.0; T(14): 0.0	0	2.125e-08
Q53S18	VRDEAEPGGEGDPGPEPAGTPSPSGEADGDCAPEDAAPSSGGAPR	T20(Phospho); S24(Phospho); C31(Carbamidomethyl)	T(20): 99.7; S(22): 12.8; S(24): 87.5; S(39): 0.0; S(40): 0.0	0	2.137e-08
H0Y6J6	RPDPDSDEDEDYERER	S6(Phospho)	S(6): 100.0; Y(12): 0.0	0	2.138e-08
O15047	SGSPAPETTNESVPFAQHSSLDSR	S3(Phospho)	S(1): 6.7; S(3): 93.3; T(8): 0.0; T(9): 0.0; S(12): 0.0; S(19): 0.0; S(20): 0.0; S(23): 0.0	0	2.139e-08
Q9Y4H2	QRSPLSDYMNLDFSSPK	S3(Phospho)	S(3): 50.0; S(6): 50.0; Y(8): 0.0; S(14): 0.0; S(15): 0.0	0	2.14e-08
Q8N556	KLSSERPSSDGEGVVENGITTCNGK	S3(Phospho); S9(Phospho); C22(Carbamidomethyl)	S(3): 94.9; S(4): 5.1; S(8): 0.3; S(9): 99.7; T(20): 0.0; T(21): 0.0	0	2.143e-08
S4R3H4	NLKTEEEEEEEEEEEEDDEEEEGDDEGQK	T4(Phospho)	T(4): 100.0	0	2.152e-08
Q6P6C2	YQEDSDPERSDYEEQQLQKEEEAR	S5(Phospho)	Y(1): 0.0; S(5): 100.0; S(10): 0.0; Y(12): 0.0	0	2.152e-08
O75179	ISSCSDESSNSNSSR	S3(Phospho); C4(Carbamidomethyl)	S(2): 0.0; S(3): 100.0; S(5): 0.0; S(8): 0.0; S(9): 0.0; S(11): 0.0; S(13): 0.0; S(14): 0.0	0	2.153e-08
B3KN82	EEPLSEEEPCTSTAIASPEK	S5(Phospho); C10(Carbamidomethyl); S17(Phospho)	S(5): 100.0; T(11): 0.0; S(12): 0.0; T(13): 0.0; S(17): 100.0	0	2.156e-08
A5PKX7	KSSTSDWPTDNQDGWDGK	S3(Phospho)	S(2): 0.1; S(3): 99.9; T(4): 0.0; S(5): 0.0; T(9): 0.0	0	2.159e-08
B4DQA3	TLSPTPSAEGYQDVR	S3(Phospho)	T(1): 0.0; S(3): 100.0; T(5): 0.0; S(7): 0.0; Y(11): 0.0	0	2.159e-08
Q68CX0	KQSGSPTLDTAPNGR	S5(Phospho)	S(3): 0.0; S(5): 100.0; T(7): 0.0; T(10): 0.0	0	2.164e-08
P27816	KKPCSETSQIEDTPSSKPTLLANGGHGVEGSDTTGSPTEFLEEK	C4(Carbamidomethyl); S36(Phospho)	S(5): 0.0; T(7): 0.0; S(8): 0.0; T(13): 0.0; S(15): 0.0; S(16): 0.0; T(19): 0.0; S(31): 0.1; T(33): 0.1; T(34): 0.9; S(36): 89.9; T(38): 9.0	0	2.167e-08
Q9H8G2	SVNEILGLAESSPNEPK	S12(Phospho)	S(1): 0.0; S(11): 0.1; S(12): 99.9	0	2.168e-08
F2Z2T1	TSDANETEDHLESLICK	S2(Phospho); C16(Carbamidomethyl)	T(1): 50.0; S(2): 50.0; T(7): 0.0; S(13): 0.0	0	2.17e-08
B7Z4V7	DSITPDIATKPGQPLFLDSISPK	S21(Phospho)	S(2): 0.0; T(4): 0.0; T(9): 0.0; S(19): 0.3; S(21): 99.7	0	2.184e-08
C9JRJ5	SNSGLGGEVSGVMSKPNVDPQPWFQDGPK	S3(Phospho)	S(1): 5.7; S(3): 94.3; S(10): 0.0; S(14): 0.0	0	2.187e-08
O60763	DLGHPVEEEDELESGDQEDEDDESEDPGKDLDHI	S14(Phospho)	S(14): 100.0; S(24): 0.0	0	2.188e-08
O95155	SQSSEGVSSLSSSPSNSLETQSQSLSR	S26(Phospho)	S(1): 0.0; S(3): 0.0; S(4): 0.0; S(8): 0.0; S(9): 0.0; S(11): 0.0; S(12): 0.0; S(13): 0.0; S(15): 0.0; S(17): 0.0; T(20): 0.0; S(22): 0.0; S(24): 0.0; S(26): 100.0	0	2.189e-08
B4DYA2	RVENSIPAAGETQNVEVAAGPAGK	S5(Phospho)	S(5): 100.0; T(12): 0.0	0	2.191e-08
Q12888	GNLLHFPSSQGEEEKEK	S9(Phospho)	S(8): 3.9; S(9): 96.1	0	2.198e-08
H0Y9H4	NNLDRNSFEGSAIPEHPEFSTFNPESVHGHR	S7(Phospho)	S(7): 99.9; S(11): 0.1; S(20): 0.0; T(21): 0.0; S(26): 0.0	0	2.203e-08
Q9UQ35	SSGHSSSELSPDAVEK	S10(Phospho)	S(1): 0.0; S(2): 0.0; S(5): 0.0; S(6): 0.0; S(7): 0.0; S(10): 100.0	0	2.205e-08
Q15545	EAENQGLDISSPGMSGHR	S11(Phospho)	S(10): 0.1; S(11): 99.9; S(15): 0.0	0	2.233e-08
B4DZD8	FSTYSQSPPDTPSLR	S7(Phospho)	S(2): 0.0; T(3): 0.0; Y(4): 0.0; S(5): 0.0; S(7): 100.0; T(11): 0.0; S(13): 0.0	0	2.236e-08
P13645	NVSTGDVNVEMNAAPGVDLTQLLNNMR	S3(Phospho)	S(3): 95.2; T(4): 4.8; T(20): 0.0	0	2.239e-08
Q9Y6D5	RCSVTSMESTVSSGTQTTVQDDPEQFEVIK	C2(Carbamidomethyl); S3(Phospho); T5(Phospho)	S(3): 100.0; T(5): 92.8; S(6): 7.2; S(9): 0.0; T(10): 0.0; S(12): 0.0; S(13): 0.0; T(15): 0.0; T(17): 0.0; T(18): 0.0	0	2.25e-08
H0Y8K3	VQAMQISSEKEEDDNEKR	S8(Phospho)	S(7): 0.0; S(8): 100.0	0	2.262e-08
B3KUL5	ATSAGSSPSCSLAGR	S7(Phospho); C10(Carbamidomethyl)	T(2): 0.0; S(3): 0.0; S(6): 0.0; S(7): 100.0; S(9): 0.0; S(11): 0.0	0	2.269e-08
J3KP58	TASESISNLSEAGSIK	S10(Phospho); S14(Phospho)	T(1): 0.0; S(3): 0.0; S(5): 0.0; S(7): 0.0; S(10): 100.0; S(14): 100.0	0	2.272e-08
Q9H6Y2	EEGEDSMAQEEKEETGDDSD	S19(Phospho)	S(6): 0.0; T(15): 0.0; S(19): 100.0	0	2.286e-08
Q96AY2	LLSSESEDEEEFIPLAQR	S4(Phospho); S6(Phospho)	S(3): 4.9; S(4): 95.1; S(6): 100.0	0	2.286e-08
Q5JSH3	ELSDQATASPIVAR	S9(Phospho)	S(3): 0.0; T(7): 0.0; S(9): 100.0	0	2.289e-08
B4DP61	RGTGQSDDSDIWDDTALIK	S6(Phospho)	T(3): 0.0; S(6): 100.0; S(9): 0.0; T(15): 0.0	0	2.293e-08
P07900	ESEDKPEIEDVGSDEEEEKKDGDK	S13(Phospho)	S(2): 0.0; S(13): 100.0	0	2.305e-08
E7EVX2	TSSFTEQLDEGTPNR	S3(Phospho)	T(1): 0.0; S(2): 0.0; S(3): 100.0; T(5): 0.0; T(12): 0.0	0	2.314e-08
P40222	SSPGQPEAGPEGAQERPSQAAPAVEAEGPGSSQAPR	S1(Phospho)	S(1): 49.8; S(2): 49.8; S(18): 0.4; S(31): 0.0; S(32): 0.0	0	2.317e-08
Q13613	QPSVETLDSPTGSHVEWCK	S9(Phospho); C18(Carbamidomethyl)	S(3): 0.0; T(6): 0.0; S(9): 99.8; T(11): 0.2; S(13): 0.0	0	2.318e-08
Q9C0J8	SSSLQGMDMASLPPR	S3(Phospho)	S(1): 0.0; S(2): 0.0; S(3): 100.0; S(11): 0.0	0	2.319e-08
B3KMD2	VVDESDETENQEEK	S5(Phospho)	S(5): 100.0; T(8): 0.0	0	2.321e-08
A0A087WXV6	QAPGVGAVGGGSPEREEVGAGYNSEDEYEAAAAR	S12(Phospho); Y22(Phospho)	S(12): 100.0; Y(22): 89.9; S(24): 9.9; Y(28): 0.1	0	2.332e-08
Q8IVT2	RALSSDSILSPAPDAR	S4(Phospho); S7(Phospho)	S(4): 100.0; S(5): 0.0; S(7): 100.0; S(10): 0.0	0	2.347e-08
B4E302	GGAAGEDEAGGPEGDPEEEDSQAETK	S21(Phospho)	S(21): 50.0; T(25): 50.0	0	2.35e-08
O75128	KSSLGNDETDKEK	S3(Phospho)	S(2): 0.0; S(3): 100.0; T(9): 0.0	0	2.354e-08
Q5H924	AGSSTPGDAPPAVAEVQGR	S3(Phospho); T5(Phospho)	S(3): 96.7; S(4): 51.7; T(5): 51.7	0	2.357e-08
Q86YS7	SQSESSDEVTELDLSHGKK	S3(Phospho); S6(Phospho)	S(1): 5.4; S(3): 94.6; S(5): 5.4; S(6): 94.6; T(10): 0.0; S(15): 0.0	0	2.359e-08
P41743	DSSTMSHTVAGGGSGDHSHQVR	S3(Phospho)	S(2): 4.9; S(3): 90.2; T(4): 4.9; S(6): 0.0; T(8): 0.0; S(14): 0.0; S(18): 0.0	0	2.37e-08
A0A087X0R7	NHLSPQQGGATPQVPSPCCR	S4(Phospho); S16(Phospho); C18(Carbamidomethyl); C19(Carbamidomethyl)	S(4): 100.0; T(11): 0.0; S(16): 100.0	0	2.378e-08
Q5JRU2	DHGFEVASTSPEDESPGSNPEPDATPFQEGLR	S18(Phospho)	S(8): 0.0; T(9): 0.0; S(10): 0.0; S(15): 0.0; S(18): 100.0; T(25): 0.0	0	2.384e-08
Q9NYF8	KAEGEPQEESPLKSK	S10(Phospho)	S(10): 100.0; S(14): 0.0	0	2.405e-08
B7Z8T5	AAVQELSSSILAGEDPEER	S8(Phospho); S9(Phospho)	S(7): 0.0; S(8): 100.0; S(9): 100.0	0	2.406e-08
B4DE42	KNQKPSQVNGAPGSPTEPAGQK	S14(Phospho)	S(6): 0.0; S(14): 100.0; T(16): 0.0	0	2.421e-08
Q6SPF0	AAAAAATAPPSPGPAQPGPR	S11(Phospho)	T(7): 0.0; S(11): 100.0	0	2.422e-08
P42166	QNGSNDSDRYSDNEEGK	S11(Phospho)	S(4): 0.0; S(7): 0.0; Y(10): 0.1; S(11): 99.9	0	2.428e-08
E7EX40	DSGSDTASAIIPSTTPSVDSDDESVVKDK	S20(Phospho)	S(2): 0.0; S(4): 0.0; T(6): 0.0; S(8): 0.0; S(13): 0.0; T(14): 0.0; T(15): 0.0; S(17): 0.0; S(20): 99.7; S(24): 0.3	0	2.43e-08
Q07157	VQIPVSRPDPEPVSDNEEDSYDEEIHDPR	S14(Phospho); S20(Phospho)	S(6): 0.0; S(14): 100.0; S(20): 92.0; Y(21): 8.0	0	2.44e-08
Q9NXG2	FTDKDQQPSGSEGEDDDAEAALKK	S9(Phospho); S11(Phospho)	T(2): 0.0; S(9): 100.0; S(11): 100.0	0	2.441e-08
B2RAG9	AKSPISSGSGGSHMSGTSSSSGMK	S3(Phospho)	S(3): 100.0; S(6): 0.0; S(7): 0.0; S(9): 0.0; S(12): 0.0; S(15): 0.0; T(17): 0.0; S(18): 0.0; S(19): 0.0; S(20): 0.0; S(21): 0.0	0	2.449e-08
B4E2A4	CSTAGSSPNSVSELSLASLTEK	C1(Carbamidomethyl); S7(Phospho); S10(Phospho)	S(2): 0.0; T(3): 0.1; S(6): 92.5; S(7): 7.5; S(10): 99.3; S(12): 0.7; S(15): 0.0; S(18): 0.0; T(20): 0.0	0	2.449e-08
G5EA48	STSSSSDTMSTFKPMVAPR	S6(Phospho)	S(1): 0.0; T(2): 0.0; S(3): 4.4; S(4): 4.4; S(5): 4.4; S(6): 86.6; T(8): 0.2; S(10): 0.0; T(11): 0.0	0	2.45e-08
B4DI25	VLLSPSIPSVGQDQTLSPGSK	S4(Phospho)	S(4): 100.0; S(6): 0.0; S(9): 0.0; T(15): 0.0; S(17): 0.0; S(20): 0.0	0	2.456e-08
B4DYY5	RYPSSISSSPQKDLTQAK	S9(Phospho)	Y(2): 0.0; S(4): 0.0; S(5): 0.0; S(7): 0.0; S(8): 0.1; S(9): 99.9; T(15): 0.0	0	2.462e-08
Q3LIF3	KFTNFQSPNIDPTEENDLDDSLSVK	S23(Phospho)	T(3): 0.0; S(7): 0.0; T(13): 0.0; S(21): 0.0; S(23): 100.0	0	2.466e-08
Q01850	SSSETILSSLAGSDIVK	S3(Phospho)	S(1): 0.2; S(2): 4.5; S(3): 95.2; T(5): 0.0; S(8): 0.0; S(9): 0.0; S(13): 0.0	0	2.475e-08
R4GN35	THSFENVSCHLPDSR	S3(Phospho); C9(Carbamidomethyl)	T(1): 0.0; S(3): 100.0; S(8): 0.0; S(14): 0.0	0	2.479e-08
B2R8U0	TDSVIIADQTPTPTR	T12(Phospho)	T(1): 0.0; S(3): 0.0; T(10): 0.1; T(12): 50.0; T(14): 50.0	0	2.48e-08
Q86TC9	VATIQQCQSPTNYLQGLDGKPIIAAPVFTK	C7(Carbamidomethyl); S9(Phospho)	T(3): 0.1; S(9): 7.2; T(11): 85.6; Y(13): 7.2; T(29): 0.0	0	2.486e-08
Q15185	DWEDDSDEDMSNFDR	S6(Phospho)	S(6): 100.0; S(11): 0.0	0	2.491e-08
A0A087X1N2	SQLDDHPESDDEENFIDANDDEDMEK	S9(Phospho)	S(1): 0.0; S(9): 100.0	0	2.5e-08
B4E1R0	VEHSPGPPPVDK	S4(Phospho)	S(4): 100.0	0	2.506e-08
Q68CZ2	WDSYENLSADGEVLHTQGPVDGSLYAK	S3(Phospho)	S(3): 99.6; Y(4): 0.4; S(8): 0.0; T(16): 0.0; S(23): 0.0; Y(25): 0.0	0	2.511e-08
H7C3Y7	RISQVSSGETEYNPTEAR	S3(Phospho)	S(3): 100.0; S(6): 0.0; S(7): 0.0; T(10): 0.0; Y(12): 0.0; T(15): 0.0	0	2.512e-08
Q6PL18	NNSNTCNIENELEDSRK	S3(Phospho); C6(Carbamidomethyl)	S(3): 100.0; T(5): 0.0; S(15): 0.0	0	2.519e-08
A0A024RCR6	ENASPAPGTTAEEAMSR	S4(Phospho)	S(4): 100.0; T(9): 0.0; T(10): 0.0; S(16): 0.0	0	2.538e-08
B4DN59	KPSGLNGEASKSQEMVHLVNK	S12(Phospho)	S(3): 0.0; S(10): 0.0; S(12): 100.0	0	2.54e-08
O95425	EMEKSFDEQNVPK	S5(Phospho)	S(5): 100.0	0	2.55e-08
Q8N995	RPTPNDDTLDEGVGLVHSNIATEHIPSPAKK	S27(Phospho)	T(3): 0.0; T(8): 0.0; S(18): 0.0; T(22): 0.0; S(27): 100.0	0	2.556e-08
H0YGG4	LGSPGAPQQEDAMDDKELIEYFK	S3(Phospho)	S(3): 100.0; Y(21): 0.0	0	2.562e-08
B2RBM8	VIPEDASESEEKLDQK	S7(Phospho)	S(7): 99.9; S(9): 0.1	0	2.568e-08
F8W1E5	SIGSAVDQGNESIVAK	S1(Phospho)	S(1): 100.0; S(4): 0.0; S(12): 0.0	0	2.578e-08
B4DYT5	VSNQDSKSPLGFYCDQNPVESSMCQSNSR	S8(Phospho); C14(Carbamidomethyl); C24(Carbamidomethyl)	S(2): 33.3; S(6): 33.3; S(8): 33.3; Y(13): 0.0; S(21): 0.0; S(22): 0.0; S(26): 0.0; S(28): 0.0	0	2.578e-08
Q86YR5	APSSDEECFFDLLTK	S3(Phospho); C8(Carbamidomethyl)	S(3): 96.7; S(4): 3.3; T(14): 0.0	0	2.579e-08
P22736	PCIQAQYGTPAPSPGPR	C2(Carbamidomethyl); S13(Phospho)	Y(7): 0.0; T(9): 0.0; S(13): 100.0	0	2.583e-08
O76094	TVSSPPTSPRPGSAATVSASTSNIIPPR	S4(Phospho); T7(Phospho)	T(1): 0.0; S(3): 50.0; S(4): 50.0; T(7): 91.8; S(8): 8.2; S(13): 0.0; T(16): 0.0; S(18): 0.0; S(20): 0.0; T(21): 0.0; S(22): 0.0	0	2.584e-08
A0A024RDY9	MSGFIYQGKLPTTGMTITKLEDSENHR	S2(Phospho)	S(2): 100.0; Y(6): 0.0; T(12): 0.0; T(13): 0.0; T(16): 0.0; T(18): 0.0; S(23): 0.0	0	2.586e-08
C9JE98	MGSKSPGNTSQPPAFFSK	S5(Phospho)	S(3): 0.0; S(5): 100.0; T(9): 0.0; S(10): 0.0; S(17): 0.0	0	2.594e-08
P55081	RPDYAPMESSDEEDEEFQFIK	S9(Phospho); S10(Phospho)	Y(4): 0.0; S(9): 100.0; S(10): 100.0	0	2.594e-08
O14497	VSSPAPMEGGEEEEELLGPK	S2(Phospho)	S(2): 50.0; S(3): 50.0	0	2.601e-08
Q92574	NKSESQCDEDGMTSSLSESLK	S3(Phospho); C7(Carbamidomethyl)	S(3): 99.8; S(5): 0.2; T(13): 0.0; S(14): 0.0; S(15): 0.0; S(17): 0.0; S(19): 0.0	0	2.602e-08
Q5JSH3	EYVSNDAAQSDDEEKLQSQPTDTDGGR	S4(Phospho)	Y(2): 0.0; S(4): 6.3; S(10): 93.7; S(18): 0.0; T(21): 0.0; T(23): 0.0	0	2.605e-08
Q9H1E3	TPSPKEEDEEPESPPEK	S13(Phospho)	T(1): 0.0; S(3): 0.0; S(13): 100.0	0	2.607e-08
B4DY23	KPEDVLDDDDAGSAPLKSSGQHQNDK	S18(Phospho)	S(13): 0.0; S(18): 94.5; S(19): 5.5	0	2.608e-08
Q96B36	AATAARPPAPPPAPQPPSPTPSPPRPTLAR	S18(Phospho); S22(Phospho)	T(3): 0.0; S(18): 100.0; T(20): 0.0; S(22): 100.0; T(27): 0.0	0	2.609e-08
M0QXN6	RTNSDSALHQSTMTPTQPESFSSGSQDVHQK	S4(Phospho)	T(2): 6.8; S(4): 86.5; S(6): 6.8; S(11): 0.0; T(12): 0.0; T(14): 0.0; T(16): 0.0; S(20): 0.0; S(22): 0.0; S(23): 0.0; S(25): 0.0	0	2.612e-08
R4GNJ5	TPSSPLQSCTPSLSPR	S4(Phospho); C9(Carbamidomethyl)	T(1): 0.0; S(3): 0.0; S(4): 100.0; S(8): 0.0; T(10): 0.0; S(12): 0.0; S(14): 0.0	0	2.614e-08
U3KQ48	SDLRKSPVFSDEDSDLDFDISK	S6(Phospho); S10(Phospho); S14(Phospho)	S(1): 0.0; S(6): 100.0; S(10): 100.0; S(14): 100.0; S(21): 0.0	0	2.62e-08
A0A024R637	VASPMNKSPSAMQQQDGLDR	S8(Phospho)	S(3): 0.0; S(8): 99.7; S(10): 0.3	0	2.625e-08
Q13185	KSLSDSESDDSK	S4(Phospho)	S(2): 0.0; S(4): 100.0; S(6): 0.0; S(8): 0.0; S(11): 0.0	0	2.633e-08
A0A087WT18	QPASAQSTPSTTPHSSPK	S16(Phospho)	S(4): 0.0; S(7): 0.0; T(8): 0.0; S(10): 0.0; T(11): 0.2; T(12): 0.2; S(15): 95.0; S(16): 4.5	0	2.637e-08
F8W7U3	KASALLFSSDEEDQWNIPASQTHLASDSR	S9(Phospho)	S(3): 0.0; S(8): 7.3; S(9): 92.7; S(20): 0.0; T(22): 0.0; S(26): 0.0; S(28): 0.0	0	2.654e-08
Q59FH4	AMSTTSISSPQPGK	S3(Phospho)	S(3): 100.0; T(4): 0.0; T(5): 0.0; S(6): 0.0; S(8): 0.0; S(9): 0.0	0	2.659e-08
O95218	LDEDEDEDDADLSKYNLDASEEEDSNK	S20(Phospho)	S(13): 0.0; Y(15): 0.0; S(20): 100.0; S(25): 0.0	0	2.665e-08
Q8IWX8	SRSRSPTPPSSAGLGSNSAPPIPDSR	S1(Phospho); S3(Phospho); S5(Phospho); T7(Phospho)	S(1): 100.0; S(3): 100.0; S(5): 100.0; T(7): 100.0; S(10): 0.0; S(11): 0.0; S(16): 0.0; S(18): 0.0; S(25): 0.0	0	2.668e-08
Q5JPT2	RPPSQSLTSSSLSSPDIFDSPSPEEDKEEHISLAHR	S22(Phospho)	S(4): 0.0; S(6): 0.0; T(8): 0.0; S(9): 0.0; S(10): 0.0; S(11): 0.0; S(13): 0.0; S(14): 0.0; S(20): 0.1; S(22): 99.9; S(32): 0.0	0	2.671e-08
A0JLU2	SPGDFTSAAQLASTPFHK	S1(Phospho)	S(1): 100.0; T(6): 0.0; S(7): 0.0; S(13): 0.0; T(14): 0.0	0	2.678e-08
P13051	KAPAGQEEPGTPPSSPLSAEQLDR	T11(Phospho); S15(Phospho)	T(11): 100.0; S(14): 0.0; S(15): 100.0; S(18): 0.0	0	2.679e-08
E9PM92	RSASPDDDLGSSNWEAADLGNEERK	S12(Phospho)	S(2): 0.3; S(4): 99.7; S(11): 0.0; S(12): 0.0	0	2.69e-08
X5D7P8	TEDGDWEWSDDEMDEK	S9(Phospho)	T(1): 0.0; S(9): 100.0	0	2.705e-08
Q59GL0	TEHSHSPGDSSAPIQNTDCCHSSER	S4(Phospho); C19(Carbamidomethyl); C20(Carbamidomethyl)	T(1): 48.2; S(4): 48.2; S(6): 3.6; S(10): 0.0; S(11): 0.0; T(17): 0.0; S(22): 0.0; S(23): 0.0	0	2.706e-08
Q6QNY0	VAGEAAETDSEPEPEPEPTAAPR	T8(Phospho); S10(Phospho)	T(8): 100.0; S(10): 100.0; T(19): 0.0	0	2.712e-08
H3BPL0	RRFSDSEGEETVPEPR	S4(Phospho); S6(Phospho)	S(4): 100.0; S(6): 100.0; T(11): 0.0	0	2.713e-08
E9PMS6	RRSQFFEQGSSDSVVPDLPVPTISAPSR	S3(Phospho)	S(3): 33.3; S(10): 33.3; S(11): 33.3; S(13): 0.0; T(22): 0.0; S(24): 0.0; S(27): 0.0	0	2.72e-08
Q9Y4H2	ASSPAESSPEDSGYMR	S3(Phospho)	S(2): 0.1; S(3): 99.9; S(7): 0.0; S(8): 0.0; S(12): 0.0; Y(14): 0.0	0	2.721e-08
P02545	ASASGSGAQVGGPISSGSSASSVTVTR	S22(Phospho)	S(2): 0.0; S(4): 0.0; S(6): 0.0; S(15): 0.0; S(16): 0.0; S(18): 0.2; S(19): 3.4; S(21): 48.1; S(22): 48.1; T(24): 0.2; T(26): 0.0	0	2.729e-08
Q9NTI5	AESPESSAIESTQSTPQK	S3(Phospho); T15(Phospho)	S(3): 100.0; S(6): 0.0; S(7): 0.0; S(11): 0.0; T(12): 0.0; S(14): 4.8; T(15): 95.2	0	2.731e-08
Q06210	VDSTTCLFPVEEK	S3(Phospho); C6(Carbamidomethyl)	S(3): 99.9; T(4): 0.1; T(5): 0.0	0	2.733e-08
B4DDR0	EREAANEAGDSSQDEAEDDVK	S11(Phospho)	S(11): 96.0; S(12): 4.0	0	2.736e-08
P55081	KIVEPEVVGESDSEVEGDAWR	S11(Phospho)	S(11): 100.0; S(13): 0.0	0	2.737e-08
Q5JSZ5	SPGSSWQEYGPSDTCGSR	S1(Phospho); C15(Carbamidomethyl)	S(1): 100.0; S(4): 0.0; S(5): 0.0; Y(9): 0.0; S(12): 0.0; T(14): 0.0; S(17): 0.0	0	2.742e-08
A0A024R233	SILKPSTPIPPQEGEEVGESSEEQDNAPK	S20(Phospho)	S(1): 0.0; S(6): 0.0; T(7): 0.0; S(20): 94.3; S(21): 5.7	0	2.758e-08
I3L4A4	LRSDPDACPTMPLLAMLLR	S3(Phospho); C8(Carbamidomethyl)	S(3): 100.0; T(10): 0.0	0	2.761e-08
Q14126	AASYTEEDENHTAK	S3(Phospho)	S(3): 100.0; Y(4): 0.0; T(5): 0.0; T(12): 0.0	0	2.767e-08
O75376	QQQLEEEAAKPPEPEKPVSPPPVEQK	S19(Phospho)	S(19): 100.0	0	2.779e-08
D6RA71	RLPQDHADSCVVSSDDEELSR	C10(Carbamidomethyl); S13(Phospho); S14(Phospho)	S(9): 0.0; S(13): 100.0; S(14): 100.0; S(20): 0.0	0	2.781e-08
Q08J23	AGEPNSPDAEEANSPDVTAGCDPAGVHPPR	S6(Phospho); S14(Phospho); C21(Carbamidomethyl)	S(6): 100.0; S(14): 100.0; T(18): 0.0	0	2.805e-08
A0A024R7K0	EAELESPEVMPEEEDEDDEDGGEEAPAPGGAGK	S6(Phospho)	S(6): 100.0	0	2.816e-08
H0Y7Y8	KDIEVLSEDTDYEEDEVTKK	S7(Phospho); T10(Phospho)	S(7): 100.0; T(10): 100.0; Y(12): 0.0; T(18): 0.0	0	2.823e-08
Q9Y6X9	LMKPPSPEHQSLDTQQEGGEEEVGPVAQQAIAVAEPSTSECLR	S6(Phospho); C41(Carbamidomethyl)	S(6): 98.6; S(11): 1.3; T(14): 0.0; S(37): 0.0; T(38): 0.0; S(39): 0.0	0	2.838e-08
P24534	DDDDIDLFGSDDEEESEEAKR	S10(Phospho)	S(10): 100.0; S(16): 0.0	0	2.84e-08
O00267	DVTNFTVGGFAPMSPR	S14(Phospho)	T(3): 0.0; T(6): 0.0; S(14): 100.0	0	2.849e-08
Q6UUV7	QPPVSPLTLSPGPEAHQGFSR	S10(Phospho)	S(5): 0.0; T(8): 0.0; S(10): 100.0; S(20): 0.0	0	2.856e-08
B4E0X0	NAPAAVDEGSISPR	S12(Phospho)	S(10): 0.0; S(12): 100.0	0	2.859e-08
Q02241	RRSSTVAPAQPDGAESEWTDVETR	S3(Phospho)	S(3): 89.6; S(4): 5.2; T(5): 5.2; S(16): 0.0; T(19): 0.0; T(23): 0.0	0	2.863e-08
P24534	YGPADVEDTTGSGATDSKDDDDIDLFGSDDEEESEEAKR	S28(Phospho)	Y(1): 0.0; T(9): 0.0; T(10): 0.0; S(12): 0.0; T(15): 0.0; S(17): 0.0; S(28): 100.0; S(34): 0.0	0	2.87e-08
F8VWH9	AEGPLDSPSEGHSYQNSGLDHFQNSNIDQSFWETFGSAEPTK	S7(Phospho)	S(7): 88.5; S(9): 10.8; S(13): 0.2; Y(14): 0.2; S(17): 0.2; S(25): 0.2; S(30): 0.0; T(34): 0.0; S(37): 0.0; T(41): 0.0	0	2.896e-08
F8W7U3	VQSTADIFGDEEGDLFK	S3(Phospho)	S(3): 100.0; T(4): 0.0	0	2.901e-08
Q8IVF2	SKSTEDGAELEEQK	S3(Phospho)	S(1): 0.0; S(3): 100.0; T(4): 0.0	0	2.906e-08
Q7Z3K3	SLDSEPSVPSAAKPPSPEK	S16(Phospho)	S(1): 0.0; S(4): 0.0; S(7): 0.0; S(10): 0.0; S(16): 100.0	0	2.922e-08
A8K6N4	ASVSQTSPQSASSPR	S13(Phospho)	S(2): 0.0; S(4): 0.0; T(6): 0.0; S(7): 0.0; S(10): 0.0; S(12): 0.1; S(13): 99.9	0	2.926e-08
E5RJY1	TASGSSVTSLDGTR	T1(Phospho); S3(Phospho)	T(1): 100.0; S(3): 100.0; S(5): 0.0; S(6): 0.0; T(8): 0.0; S(9): 0.0; T(13): 0.0	0	2.927e-08
A0A087WV66	KPMKTSPEMDIQNPDDGAR	S6(Phospho)	T(5): 5.1; S(6): 94.9	0	2.929e-08
Q05BX6	AQSTDSLGTSGSLQSK	S6(Phospho)	S(3): 0.0; T(4): 0.0; S(6): 100.0; T(9): 0.0; S(10): 0.0; S(12): 0.0; S(15): 0.0	0	2.947e-08
Q14694	TCNSPQNSTDSVSDIVPDSPFPGALGSDTR	C2(Carbamidomethyl); S4(Phospho)	T(1): 49.9; S(4): 49.9; S(8): 0.2; T(9): 0.0; S(11): 0.0; S(13): 0.0; S(19): 0.0; S(27): 0.0; T(29): 0.0	0	2.954e-08
P49006	EGGGDSSASSPTEEEQEQGEIGACSDEGTAQEGK	T12(Phospho); C24(Carbamidomethyl)	S(6): 8.9; S(7): 1.0; S(9): 1.0; S(10): 8.9; T(12): 80.0; S(25): 0.0; T(29): 0.0	0	2.965e-08
E7ESG2	KVLQDSDSETEDTNASPEK	S6(Phospho); S8(Phospho)	S(6): 100.0; S(8): 99.8; T(10): 0.2; T(13): 0.0; S(16): 0.0	0	2.971e-08
B4DLR3	SPQPPVEEEDEHFDDTVVCLDTYNCDLHFK	S1(Phospho); C19(Carbamidomethyl); C25(Carbamidomethyl)	S(1): 100.0; T(16): 0.0; T(22): 0.0; Y(23): 0.0	0	2.974e-08
A0A024R2A4	SLSSPTVTLSAPLEGAK	S3(Phospho)	S(1): 0.0; S(3): 100.0; S(4): 0.0; T(6): 0.0; T(8): 0.0; S(10): 0.0	0	2.975e-08
P45973	TADSSSSEDEEEYVVEK	S6(Phospho); S7(Phospho)	T(1): 0.0; S(4): 0.0; S(5): 4.7; S(6): 95.3; S(7): 100.0; Y(13): 0.0	0	2.977e-08
O95218	YNLDASEEEDSNKK	S6(Phospho)	Y(1): 0.0; S(6): 100.0; S(11): 0.0	0	2.978e-08
P04075	GILAADESTGSIAKR	S11(Phospho)	S(8): 0.0; T(9): 0.1; S(11): 99.9	0	2.992e-08
H0YB24	LEDSEVRSVASNQSEMEFSSLQDMPK	S8(Phospho); S11(Phospho)	S(4): 0.4; S(8): 99.6; S(11): 100.0; S(14): 0.0; S(19): 0.0; S(20): 0.0	0	2.993e-08
Q86VM9	DSGSDQDLDGAGVRASDLEDEESAAR	S16(Phospho)	S(2): 0.0; S(4): 0.0; S(16): 100.0; S(23): 0.0	0	3.002e-08
Q9Y2W1	WAHDKFSGEEGEIEDDESGTENR	S7(Phospho); S18(Phospho)	S(7): 100.0; S(18): 50.0; T(20): 50.0	0	3.004e-08
C9J0I9	DTSATSQSVNGSPQAEQPSLESTSK	S12(Phospho)	T(2): 0.0; S(3): 0.0; T(5): 0.0; S(6): 0.0; S(8): 0.0; S(12): 100.0; S(19): 0.0; S(22): 0.0; T(23): 0.0; S(24): 0.0	0	3.011e-08
B5BUB5	FASDDEHDEHDENGATGPVK	S3(Phospho)	S(3): 100.0; T(16): 0.0	0	3.019e-08
H0Y6B5	TYSSSGSSGGSHPSSR	S3(Phospho)	T(1): 0.0; Y(2): 0.0; S(3): 100.0; S(4): 0.0; S(5): 0.0; S(7): 0.0; S(8): 0.0; S(11): 0.0; S(14): 0.0; S(15): 0.0	0	3.025e-08
Q12948	TENGTCPSPPQPLSPAAALGSGSAAAVPK	T1(Phospho); C6(Carbamidomethyl)	T(1): 89.3; T(5): 5.3; S(8): 5.3; S(14): 0.0; S(21): 0.0; S(23): 0.0	0	3.044e-08
Q9H1H9	TGSCSELDACPSK	S3(Phospho); C4(Carbamidomethyl); C10(Carbamidomethyl)	T(1): 0.0; S(3): 100.0; S(5): 0.0; S(12): 0.0	0	3.049e-08
B3KM94	ESISPQPADSACSSPAPSTGK	S4(Phospho); C12(Carbamidomethyl)	S(2): 0.3; S(4): 99.7; S(10): 0.0; S(13): 0.0; S(14): 0.0; S(18): 0.0; T(19): 0.0	0	3.052e-08
Q0VAI6	TPTPSHYPLSCPSGISTQNSLSCSPPHQSPALEDIGCSSCAEK	C11(Carbamidomethyl); C23(Carbamidomethyl); S24(Phospho); C37(Carbamidomethyl); C40(Carbamidomethyl)	T(1): 0.0; T(3): 0.0; S(5): 0.0; Y(7): 0.0; S(10): 0.0; S(13): 0.0; S(16): 0.1; T(17): 0.1; S(20): 0.6; S(22): 49.6; S(24): 49.6; S(29): 0.0; S(38): 0.0; S(39): 0.0	0	3.052e-08
O94864	TEESEPLPSCPGSPPLPDDLLPLDCK	C10(Carbamidomethyl); S13(Phospho); C25(Carbamidomethyl)	T(1): 0.0; S(4): 0.0; S(9): 0.0; S(13): 100.0	0	3.06e-08
B3KMF4	ERVDDSTGTVISDVEEDAGELSR	S12(Phospho)	S(6): 0.0; T(7): 0.0; T(9): 0.0; S(12): 100.0; S(22): 0.0	0	3.061e-08
O15061	QRSPAPGSPDEEGGAEAPAAGIR	S3(Phospho); S8(Phospho)	S(3): 100.0; S(8): 100.0	0	3.067e-08
S4R3H4	LSEGSQPAEEEEDQETPSR	S2(Phospho); S5(Phospho)	S(2): 100.0; S(5): 100.0; T(16): 0.0; S(18): 0.0	0	3.07e-08
H7BXI1	SSSSLLASPGHISVK	S3(Phospho)	S(1): 0.0; S(2): 0.0; S(3): 99.8; S(4): 0.2; S(8): 0.0; S(13): 0.0	0	3.076e-08
Q9UN86	YEDEVFGDSEPELDEESEDEVEEEQEER	S9(Phospho); S17(Phospho)	Y(1): 0.0; S(9): 100.0; S(17): 100.0	0	3.078e-08
C9JWF0	EEGPPPPSPDGASSDAEPEPPSGR	S13(Phospho)	S(8): 0.0; S(13): 50.0; S(14): 50.0; S(22): 0.0	0	3.079e-08
O95365	AGAAAGDSDEESRADDK	S8(Phospho)	S(8): 100.0; S(12): 0.0	0	3.112e-08
Q8N573	MTGSNTEEIDSR	S4(Phospho)	T(2): 0.0; S(4): 96.9; T(6): 3.1; S(11): 0.0	0	3.112e-08
Q12888	KVTEETEEPIVECQECETEVSPSQTGGSSGDLGDISSFSSK	C13(Carbamidomethyl); C16(Carbamidomethyl); T25(Phospho)	T(3): 0.0; T(6): 0.0; T(18): 0.0; S(21): 0.0; S(23): 1.0; T(25): 99.0; S(28): 0.0; S(29): 0.0; S(36): 0.0; S(37): 0.0; S(39): 0.0; S(40): 0.0	0	3.127e-08
B4DFZ3	KLSDINQEEASGTSLHQK	S3(Phospho)	S(3): 100.0; S(11): 0.0; T(13): 0.0; S(14): 0.0	0	3.129e-08
C9JRP1	NGILASPQSAPGNLDNSK	S9(Phospho)	S(6): 0.0; S(9): 99.9; S(17): 0.1	0	3.141e-08
P15056	RDSSDDWEIPDGQITVGQR	S3(Phospho)	S(3): 99.9; S(4): 0.1; T(15): 0.0	0	3.155e-08
C9J5K8	KQSTQDEDAVSLCSLDISEPSNKR	S3(Phospho); C13(Carbamidomethyl)	S(3): 99.9; T(4): 0.1; S(11): 0.0; S(14): 0.0; S(18): 0.0; S(21): 0.0	0	3.158e-08
H0YBZ4	QISLPDLSQEEPQLK	S3(Phospho)	S(3): 100.0; S(8): 0.0	0	3.159e-08
O94776	GHLSRPEAQSLSPYTTSANR	S12(Phospho)	S(4): 0.0; S(10): 0.0; S(12): 100.0; Y(14): 0.0; T(15): 0.0; T(16): 0.0; S(17): 0.0	0	3.164e-08
A8K525	FGQAATMEGIGAIGGTPPAFNR	T16(Phospho)	T(6): 0.0; T(16): 100.0	0	3.169e-08
B2R7X3	TQDPSSPGTTPPQAR	S6(Phospho)	T(1): 0.0; S(5): 0.0; S(6): 100.0; T(9): 0.0; T(10): 0.0	0	3.169e-08
E5RJY1	SRTASGSSVTSLDGTR	T3(Phospho)	S(1): 0.0; T(3): 100.0; S(5): 0.0; S(7): 0.0; S(8): 0.0; T(10): 0.0; S(11): 0.0; T(15): 0.0	0	3.181e-08
F4ZW66	DSSKGEDSAEETEAKPAVVAPAPVVEAVSTPSAAFPSDATAENVK	T12(Phospho)	S(2): 0.0; S(3): 0.0; S(8): 1.4; T(12): 98.6; S(29): 0.0; T(30): 0.0; S(32): 0.0; S(37): 0.0; T(40): 0.0	0	3.184e-08
Q96RL1	VPSPGMEEAGCSR	S3(Phospho); C11(Carbamidomethyl)	S(3): 100.0; S(12): 0.0	0	3.19e-08
B1AKB5	VHGLPTTSPSGMNMAELAQQVVK	T7(Phospho)	T(6): 49.9; T(7): 49.9; S(8): 0.1; S(10): 0.1	0	3.199e-08
Q15149	ELEEVSPETPVVPATTQR	S6(Phospho)	S(6): 100.0; T(9): 0.0; T(15): 0.0; T(16): 0.0	0	3.2e-08
Q96AY2	LLSSESEDEEEFIPLAQR	S4(Phospho)	S(3): 0.1; S(4): 99.7; S(6): 0.1	0	3.201e-08
C9J185	KESETQCQTENKYDSVSGEANDSSWNDIK	S3(Phospho); C7(Carbamidomethyl)	S(3): 99.6; T(5): 0.4; T(9): 0.0; Y(13): 0.0; S(15): 0.0; S(17): 0.0; S(23): 0.0; S(24): 0.0	0	3.211e-08
G3V2W9	YYDDIYFDSDSEDEDR	S9(Phospho); S11(Phospho)	Y(1): 0.0; Y(2): 0.0; Y(6): 0.0; S(9): 100.0; S(11): 100.0	0	3.214e-08
A8MXP9	RDSFDDRGPSLNPVLDYDHGSR	S3(Phospho)	S(3): 94.9; S(10): 5.1; Y(17): 0.0; S(21): 0.0	0	3.236e-08
Q7Z7K6	AQEEGPGEPPPPELALLPPPPPPPPTPATPTSSASNLDLGEQR	T29(Phospho)	T(26): 0.0; T(29): 99.7; T(31): 0.1; S(32): 0.0; S(33): 0.1; S(35): 0.0	0	3.24e-08
Q14160	AFAAVPTSHPPEDAPAQPPTPGPAASPEQLSFR	T20(Phospho); S26(Phospho)	T(7): 0.0; S(8): 0.0; T(20): 100.0; S(26): 50.0; S(31): 50.0	0	3.249e-08
Q5W0B1	TSSEASMDAAYLDK	S3(Phospho)	T(1): 0.0; S(2): 0.0; S(3): 100.0; S(6): 0.0; Y(11): 0.0	0	3.25e-08
Q01650	SADGSAPAGEGEGVTLQR	S5(Phospho)	S(1): 0.0; S(5): 100.0; T(15): 0.0	0	3.257e-08
A8K548	EGESPAAGPPPQELVEEEPSAPPTLLEEETEDGSDK	S4(Phospho)	S(4): 100.0; S(20): 0.0; T(24): 0.0; T(30): 0.0; S(34): 0.0	0	3.266e-08
A0A060VCU4	KGGSYSQAASSDSAQGSDVSLTACKV	S13(Phospho); C24(Carbamidomethyl)	S(4): 0.0; Y(5): 0.0; S(6): 0.0; S(10): 0.0; S(11): 0.0; S(13): 100.0; S(17): 0.0; S(20): 0.0; T(22): 0.0	0	3.268e-08
Q9H2Y7	NRENSPSSQSAGLSSINK	S5(Phospho)	S(5): 100.0; S(7): 0.0; S(8): 0.0; S(10): 0.0; S(14): 0.0; S(15): 0.0	0	3.273e-08
A8K548	AGSNEDPILAPSGTPPPTIPPDETFGGR	T14(Phospho)	S(3): 0.0; S(12): 0.0; T(14): 100.0; T(18): 0.0; T(24): 0.0	0	3.28e-08
Q15454	HTDDEMTGYVATR	Y9(Phospho)	T(2): 0.0; T(7): 3.5; Y(9): 96.5; T(12): 0.0	0	3.28e-08
O14686	FSPPEPGDTPTDEPDALYVACQGQPK	S2(Phospho); C21(Carbamidomethyl)	S(2): 100.0; T(9): 0.0; T(11): 0.0; Y(18): 0.0	0	3.282e-08
A0A024R3M0	GTGSGGQLQDLDCSSSDDEGAAQNSTKPSATK	C13(Carbamidomethyl); S16(Phospho)	T(2): 11.2; S(4): 1.6; S(14): 1.6; S(15): 1.6; S(16): 84.2; S(25): 0.0; T(26): 0.0; S(29): 0.0; T(31): 0.0	0	3.285e-08
A7E2D7	TPGVLLPGAGGAAGFGMTSPPPPTSPSR	T24(Phospho)	T(1): 0.0; T(18): 0.0; S(19): 0.0; T(24): 48.6; S(25): 48.6; S(27): 2.8	0	3.296e-08
P23497	RLNECISPVANEMNHLPAHSHDLQR	C5(Carbamidomethyl); S7(Phospho)	S(7): 100.0; S(20): 0.0	0	3.304e-08
Q13283	SSSPAPADIAQTVQEDLR	S3(Phospho)	S(1): 0.0; S(2): 0.0; S(3): 100.0; T(12): 0.0	0	3.312e-08
B9EIS5	KASAQASLASK	S3(Phospho)	S(3): 100.0; S(7): 0.0; S(10): 0.0	0	3.318e-08
P54105	TEDSIRDYEDGMEVDTTPTVAGQFEDADVDH	S4(Phospho)	T(1): 48.4; S(4): 48.4; Y(8): 3.2; T(16): 0.0; T(17): 0.0; T(19): 0.0	0	3.32e-08
B4DNC7	HANQVLSLPCPNQPGDHVMPPVPGSSAPNSPMAMLTLNSNCEK	C10(Carbamidomethyl); S30(Phospho); C41(Carbamidomethyl)	S(7): 0.0; S(25): 89.8; S(26): 10.0; S(30): 0.1; T(36): 0.0; S(39): 0.0	0	3.332e-08
A8K3X3	SLHLSPQEQSASYQDR	S5(Phospho)	S(1): 0.1; S(5): 99.9; S(10): 0.0; S(12): 0.0; Y(13): 0.0	0	3.349e-08
P05114	KVSSAEGAAKEEPK	S3(Phospho)	S(3): 100.0; S(4): 0.0	0	3.36e-08
P53367	DLKHSLPSGLGLSETQITSHGFDNTK	S5(Phospho)	S(5): 100.0; S(8): 0.0; S(13): 0.0; T(15): 0.0; T(18): 0.0; S(19): 0.0; T(25): 0.0	0	3.369e-08
Q9H4L7	RNDDISELEDLSELEDLKDAK	S12(Phospho)	S(6): 0.0; S(12): 100.0	0	3.383e-08
Q6UUV7	RQPPVSPLTLSPGPEAHQGFSR	S11(Phospho)	S(6): 0.0; T(9): 0.0; S(11): 100.0; S(21): 0.0	0	3.383e-08
Q12802	ALQLSNSPGASSAFLK	S7(Phospho)	S(5): 0.0; S(7): 100.0; S(11): 0.0; S(12): 0.0	0	3.387e-08
Q9C0C2	RDSLGAYASQDANEQGQDLGKR	S3(Phospho)	S(3): 95.8; Y(7): 4.2; S(9): 0.0	0	3.388e-08
B4E1Z2	EGVSCSDEDEKPR	C5(Carbamidomethyl); S6(Phospho)	S(4): 0.0; S(6): 100.0	0	3.39e-08
Q93009	ITQNPVINGNVALSDGHNTAEEDMEDDTSWR	S14(Phospho)	T(2): 0.2; S(14): 98.4; T(19): 1.4; T(28): 0.0; S(29): 0.0	0	3.394e-08
A0PJD3	RRASQEANLLTLAQK	S4(Phospho)	S(4): 100.0; T(11): 0.0	0	3.399e-08
O15047	RPRPSTPAEEDEDDPEQEK	T6(Phospho)	S(5): 0.1; T(6): 99.9	0	3.422e-08
Q7L804	NNMTASMFDLSMKDK	S6(Phospho)	T(4): 0.0; S(6): 100.0; S(11): 0.0	0	3.429e-08
Q8NEF9	AVTIANSPSKPSEK	S7(Phospho)	T(3): 0.0; S(7): 2.4; S(9): 97.6; S(12): 0.0	0	3.438e-08
E9PMR6	HLSTPSSVSPEPQDSAK	S9(Phospho)	S(3): 0.0; T(4): 0.0; S(6): 0.0; S(7): 0.0; S(9): 100.0; S(15): 0.0	0	3.438e-08
Q9Y4E8	GPSTPKSPGASNFSTLPK	S3(Phospho); S7(Phospho)	S(3): 95.3; T(4): 4.7; S(7): 100.0; S(11): 0.0; S(14): 0.0; T(15): 0.0	0	3.439e-08
Q7Z478	FQSPQIQATISPPLQPK	S11(Phospho)	S(3): 0.0; T(9): 0.0; S(11): 100.0	0	3.45e-08
B7Z341	THSTSSSLGSGESPFSR	S5(Phospho); S6(Phospho)	T(1): 0.0; S(3): 100.0; T(4): 0.0; S(5): 0.2; S(6): 99.7; S(7): 0.2; S(10): 0.0; S(13): 0.0; S(16): 0.0	0	3.462e-08
Q86TC9	GNEDLSNNGSLHSANSTTNLAAIEPQPSPPHSEPPSVEQPPKPK	S28(Phospho)	S(6): 0.0; S(10): 0.0; S(13): 0.0; S(16): 0.0; T(17): 0.0; T(18): 0.0; S(28): 100.0; S(32): 0.0; S(36): 0.0	0	3.468e-08
A0A087WV66	IACRSPQPDPVGTPTIFKPQSK	C3(Carbamidomethyl); S5(Phospho)	S(5): 100.0; T(13): 0.0; T(15): 0.0; S(21): 0.0	0	3.47e-08
Q6VMQ6	SKSEDMDNVQSK	S3(Phospho)	S(1): 0.0; S(3): 100.0; S(11): 0.0	0	3.47e-08
A0A087WWS1	TGEDEDEEDNDALLKENESPDVR	S19(Phospho)	T(1): 0.0; S(19): 100.0	0	3.478e-08
H3BUV9	DMPGGFLFEGLSDDEDDFHPNTR	S12(Phospho)	S(12): 100.0; T(22): 0.0	0	3.508e-08
Q53GG0	KISENSYSLDDLEIGPGQLSSSTFDSEKNESR	S3(Phospho)	S(3): 32.6; S(6): 32.6; Y(7): 32.6; S(8): 2.2; S(20): 0.0; S(21): 0.0; S(22): 0.0; T(23): 0.0; S(26): 0.0; S(31): 0.0	0	3.508e-08
Q92917	LADSGDGAGPSPEEKDFLK	S11(Phospho)	S(4): 0.0; S(11): 100.0	0	3.551e-08
Q53SN6	LLNLQDSDSEECTSR	S7(Phospho); C12(Carbamidomethyl)	S(7): 96.0; S(9): 4.0; T(13): 0.0; S(14): 0.0	0	3.558e-08
K7ELR8	RVSSSESDFSDAEGGMQSK	S3(Phospho); S4(Phospho)	S(3): 100.0; S(4): 100.0; S(5): 0.0; S(7): 0.0; S(10): 0.0; S(18): 0.0	0	3.565e-08
E7EPN9	DQMEGSPNSSESFEHIAR	S6(Phospho)	S(6): 99.7; S(9): 0.3; S(10): 0.0; S(12): 0.0	0	3.566e-08
O60502	LENEGSDEDIETDVLYSPQMALK	S6(Phospho)	S(6): 100.0; T(12): 0.0; Y(16): 0.0; S(17): 0.0	0	3.566e-08
Q68DQ2	SHISETPLDSESPQQAEVSPDAK	S19(Phospho)	S(1): 0.0; S(4): 0.0; T(6): 0.0; S(10): 0.0; S(12): 0.0; S(19): 100.0	0	3.595e-08
W0Z7M9	QNSTSLTGKPGALPANLDDMK	T4(Phospho)	S(3): 2.3; T(4): 48.8; S(5): 48.8; T(7): 0.1	0	3.596e-08
F8W9S7	EVSSRPSTPGLSVVSGISATSEDIPNKIEDLR	T8(Phospho)	S(3): 3.6; S(4): 3.6; S(7): 46.2; T(8): 46.2; S(12): 0.3; S(15): 0.0; S(18): 0.0; T(20): 0.0; S(21): 0.0	0	3.603e-08
Q96ST2	EAEDSDSDDNIKR	S5(Phospho)	S(5): 99.9; S(7): 0.1	0	3.612e-08
Q5TDH0	QPPGTQQSHSSPGEITSSPQGLDNPALLR	T5(Phospho)	T(5): 93.1; S(8): 6.1; S(10): 0.4; S(11): 0.4; T(16): 0.0; S(17): 0.0; S(18): 0.0	0	3.613e-08
B4DKU3	TEIMSPLYQDEAPK	S5(Phospho)	T(1): 0.0; S(5): 100.0; Y(8): 0.0	0	3.616e-08
B7Z310	ARSPQELDQGTGAALCFFNPLFPGDLGPTK	S3(Phospho); C16(Carbamidomethyl)	S(3): 100.0; T(11): 0.0; T(29): 0.0	0	3.617e-08
Q4G0J3	SRPTSEGSDIESTEPQK	S8(Phospho)	S(1): 0.0; T(4): 0.0; S(5): 0.0; S(8): 100.0; S(12): 0.0; T(13): 0.0	0	3.645e-08
O60832	SLPEEDVAEIQHAEEFLIKPESK	S1(Phospho)	S(1): 100.0; S(22): 0.0	0	3.654e-08
F8WJN3	EMDTARTPLSEAEFEEIMNR	T7(Phospho)	T(4): 0.2; T(7): 99.8; S(10): 0.0	0	3.662e-08
Q9UQ35	HGGSPQPLATTPLSQEPVNPPSEASPTR	S4(Phospho); T27(Phospho)	S(4): 100.0; T(10): 0.0; T(11): 0.0; S(14): 0.0; S(22): 0.3; S(25): 49.9; T(27): 49.9	0	3.671e-08
O60763	LKDLGHPVEEEDELESGDQEDEDDESEDPGKDLDHI	S16(Phospho)	S(16): 100.0; S(26): 0.0	0	3.676e-08
Q6GYQ0	HFSQSEETGNEVFGALNEEQPLPR	S3(Phospho)	S(3): 94.9; S(5): 5.1; T(8): 0.0	0	3.68e-08
Q12948	IGLNNSPVNGNSSCQMAFPSSQSLYR	S6(Phospho); C14(Carbamidomethyl)	S(6): 100.0; S(12): 0.0; S(13): 0.0; S(20): 0.0; S(21): 0.0; S(23): 0.0; Y(25): 0.0	0	3.695e-08
A8K4T9	KGDGGGASGGGGGGGGSGGGGSGGGGGGGSSRPPAPQENTTSEAGLPQGEAR	S22(Phospho)	S(8): 0.0; S(17): 13.7; S(22): 86.3; S(30): 0.0; S(31): 0.0; T(40): 0.0; T(41): 0.0; S(42): 0.0	0	3.722e-08
D6RD37	GSSGENNNPGSPTVSNFR	S11(Phospho)	S(2): 0.0; S(3): 0.0; S(11): 99.9; T(13): 0.1; S(15): 0.0	0	3.73e-08
D9ZGF8	LLDLSDSTSVASFPSADETDGNLPESR	S12(Phospho)	S(5): 0.0; S(7): 0.0; T(8): 0.3; S(9): 0.3; S(12): 49.7; S(15): 49.7; T(19): 0.0; S(26): 0.0	0	3.741e-08
P38159	GPPSRGGHMDDGGYSMNFNMSSSR	S4(Phospho)	S(4): 100.0; Y(14): 0.0; S(15): 0.0; S(21): 0.0; S(22): 0.0; S(23): 0.0	0	3.748e-08
A0A087X0S7	STQESLTAGGTDLKR	T2(Phospho)	S(1): 50.0; T(2): 50.0; S(5): 0.0; T(7): 0.0; T(11): 0.0	0	3.755e-08
P05787	LESGMQNMSIHTK	S9(Phospho)	S(3): 0.0; S(9): 100.0; T(12): 0.0	0	3.765e-08
A0A087WVU5	DPGTPNDDSDIKECNSADHIK	T4(Phospho); C14(Carbamidomethyl)	T(4): 100.0; S(9): 0.0; S(16): 0.0	0	3.772e-08
Q9H4G0	GAPSQDDESGGIEDSPDRGACSTPDMPQFEPVK	S15(Phospho); C21(Carbamidomethyl)	S(4): 0.0; S(9): 50.0; S(15): 50.0; S(22): 0.0; T(23): 0.0	0	3.781e-08
O00767	EKGSTLDLSDLEAEK	S4(Phospho)	S(4): 99.9; T(5): 0.1; S(9): 0.0	0	3.782e-08
O60930	SASPEVSEGHENQHGQESEAK	S3(Phospho)	S(1): 0.2; S(3): 99.8; S(7): 0.0; S(18): 0.0	0	3.795e-08
[truncated: 10,135 more rows]

## Sheet: Table S2
UniProt ID	Peptide Modified Sequence	Precursor Mz	ControlDIA_1	ControlDIA_2	ControlDIA_3	5minDIA_1	5minDIA_2	5minDIA_3	20minDIA_1	20minDIA_2	20minDIA_3
O75822	VLT[+80]PEEQLADK	661.816							3165266	3526315	3267108
O75822	LQEES[+80]DLELAK	677.811	13665989	13819633	17440316	14623664	14725224	14734461		13054272	11908105
Q6SPF0	RGAT[+80]PPAPPR	550.274
Q6SPF0	AAAAAATAPPS[+80]PGPAQPGPR	918.444	228698464	147423520	166018608	154541456			68290600		96175240
P19338	KVVVS[+80]PTK	469.26	479931392	546127616	637903104	803230592	840168576	783604992	585564032	750684544	593291776
P19338	KVVVS[+80]PTKK	533.307	1385174272	1291836288	548327104	1418468096	1913340160	1227310848	598000000	896658944	684560000
P19338	VVVS[+80]PTK	405.212	102430920	95716152	87595464	98425880	89250552	89239968		119655648	104470608
P19338	VVVS[+80]PTKK	469.26	989465408	944710080	949515392		1174887296	1122240000	608503040	851606976	674272384
P19338	VAVAT[+80]PAKK	482.765	23795954	26476630			37874028	32589124		12474568
P19338	AAVT[+80]PGKK	426.223	7989932				14485280		663382		3341532
P19338	AVT[+80]TPGKK	441.228							166613
P19338	S[+80]ISLYYTGEK	620.778	7416614	6519554	8385526	8697738	7696748	8163233		6145639	5542649
P19338	LELQGPRGS[+80]PNAR	737.862	529935040	327252096	589850240	304930976		124103248
P19338	GLS[+80]EDTTEETLK	701.803
P19338	GFGFVDFNS[+80]EEDAK	821.327	19461044	16361183	18816312	24025990	22847556	19720228	14090826	12292009	13218481
Q99856	EGTPGS[+80]PGR	469.192		13294046		990130			7190698		10266045
B2RD09	QLEEPGAGTPS[+80]PVR	759.353	57704472	51501464	67804952	62290588	67227768	58101644	27971518	41207520	31900282
B2RD09	AAAGACT[+80]PPCT	578.712		4457636
Q9Y4H2	S[+80]KSQSSGSSATHPISVPGAR	1010.98	32327172	44979492	50089956	43773492	46551968	37938240	12275282	7560737	12248417
Q9Y4H2	SKS[+80]QSSGSSATHPISVPGAR	1010.98	43897220	44547624	43879488	46783796	34576912		13610147	18932708	14473347
Q9Y4H2	S[+80]QSSGSSATHPISVPGAR	903.413	82209824	79469992	93789480	63873780	70006168	56612128	55120356	74440144	66520632
Q9Y4H2	TDS[+80]LAATPPAAK	611.789	10428765			39439012	33072128	33065674	15443760	30593770	24915578
Q9Y4H2	S[+80]HTLSGGCGGR	584.732		45777652	32268998	53508172	56551256	51498044	20193978	25692576	21523756
Q9Y4H2	SHT[+80]LSGGCGGR	584.732	50037484	45412952	42037400	53197420	56283928	50477380	19900976	26878176	21108280
Q9Y4H2	SNT[+80]PESIAETPPAR	775.348	142206160	134279408	156890992	135330144	140235072	129080272	60574608	89102544	79222816
Q9Y4H2	SNTPESIAET[+80]PPAR	775.348	19274984	21053134	37858848	50030468	54874932	48267556	33889620	52973380	36338136
Q9Y4H2	RVS[+80]GDAAQDLDR	691.807	163018928	273105856	282040544	361324384	383737312	352444000		243238128	233303760
Q9Y4H2	TYS[+80]LTTPAR	545.252	174476720	189223696	190209232	237778656	186317280	142790128	115652952	153808128	122248200
Q9Y4H2	ATFSGS[+80]AGR	467.195	52539584	52343168	52607340	46330612	47780912	47962584	21817198	25115024	21831426
Q9Y4H2	LCPSCPASS[+80]PK	642.262	183814896	256267136	276432064	308537760	326923232	307851328	172168880	189649712	162910672
Q9Y4H2	SDDYMPMS[+80]PASVSAPK	881.857	15538776		63012780	173763936			97053096	116372232
Q9Y4H2	ASS[+80]PAESSPEDSGYMR	875.835	439061440	348309952		372076192	353395200	412725024	171333248	258314912	213994896
Q9Y4H2	AS[+80]SPAESS[+80]PEDSGYMR	915.818	237079616	304415264	216962880	440167648	550823872	491092864	106772664	115759496
Q9Y4H2	AS[+80]SPAES[+80]S[+80]PEDSGYMR	955.801	27627950					16832004	28954230	39533304
Q9Y4H2	GVPGCCYS[+80]SLPR	716.791	60099928	93761032	113202920		66331772	55797364	24381186	27002506	26032252
Q9Y4H2	GVPGCCYSS[+80]LPR	716.791	59114872	94270144	113399720		66134564	55893316	25432146	27859694	25787488
Q9Y4H2	S[+80]PGEYINIDFGEPGAR	901.393	360910208	258708432	296356960	327317856	279691040	227562416	247590464	221191392	188696512
Q9Y4H2	QRS[+80]PLSDYMNLDFSSPK	1032.96	29761704	36957268	18409022	57123072	42304192		32459602	25964792
Q9Y4H2	VAS[+80]PTSGVK	463.223	421672480	440588416	420687552	457574336	499617152	361688608	249961360	343179840	274630400
Q9Y4H2	VAS[+80]PTSGVKR	541.274	58954164	59349812	41681448	33710036	24920078	26299686
Q9Y4H2	RHNS[+80]ASVENVSLR	774.868	46553900	49006844	50336612	82055656	69583760		17399702	25899902	18291176
Q9Y4H2	RHNSAS[+80]VENVSLR	774.868									86520
Q9Y4H2	RHNS[+80]AS[+80]VENVSLR	814.851	8662304	6366274		40986756	37979928	33430334	3787642
Q9Y4H2	HNS[+80]ASVENVSLR	696.817	212286544	218869200	288916512	389855872	389155584	316438688	237972608	428177856	334660992
Q9Y4H2	HNSAS[+80]VENVSLR	696.817	212816016	195622464	242142512	157115600	146923200	141803488	101397896	150701024	131871872
Q9Y4H2	HNSAS[+80]VENVSLRK	760.864	9385967	14560202	11861488		1816000			969793
Q9Y4H2	KSSEGGVGVGPGGGDEPPTS[+80]PR	1052.47	105334256	37067268	65728892	57084996	59801856	36772212	5928160		20594376
Q9Y4H2	KS[+80]SEGGVGVGPGGGDEPPTS[+80]PR	1092.45	26077858				67771752	92589600	42596596	40652764	48742984
Q9Y4H2	KSS[+80]EGGVGVGPGGGDEPPTS[+80]PR	1092.45	24483930	4353207			69564096		42942952	40916088	48288744
Q9Y4H2	SSEGGVGVGPGGGDEPPT[+80]SPR	988.423	1010458304	671638144	924733184	579222400	413932032	578421568	218018112	304417632	249453920
Q9Y4H2	SSEGGVGVGPGGGDEPPTS[+80]PR	988.423		666520000	926549504	583703808	411100640	577102528	223879344	310718144	245031408
B2R8U0	TDSVIIADQTPT[+80]PTR	847.903	24808694	27686386	30012234	35194304	17558518	28237336	20166978	23989560	20695072
B2R8U0	TDSVIIADQT[+80]PT[+80]PTR	887.887	131265736		137409824	323245120	276430624	268569952	58080128	80884248	64263916
B2R8U0	T[+80]DSVIIADQT[+80]PT[+80]PTR	927.87		2735683		2429200	2068204	1173869		723040
B2R8U0	TDS[+80]VIIADQT[+80]PT[+80]PTR	927.87	22607774	20811376	23335794	75408536	66111708	75587688	11782293	10791697	7888835
B2R8U0	AAAGPLDMS[+80]LPSTPDIK	882.418	14630210	11421081		24077866	20332756	24345044	7800948
B2R8U0	AAAGPLDMSLPS[+80]TPDIK	882.418	17673536	12622782		73360088	67359864		9393571	10666847	13243093
B2R8U0	AAAGPLDMS[+80]LPST[+80]PDIK	922.401	75080336	70455760	96237232	177728912	175404688	143991776		15880749	20911522
B2R8U0	RRT[+80]VDEDPDER	734.315					31909
B2R8U0	T[+80]VDEDPDER	578.214	20141398	17610474	19357612	32487792	33176578	31332018	26448790	28417744	23569756
B2R8U0	T[+80]VDEDPDERR	656.264	13488451			20052396			9229335
B7Z1X9	YS[+80]GAYGASVSDEELK	828.345	64320528	55754804	83021792	55951932	62081916	59693380	35058208	47327620	44882004
B7Z1X9	YS[+80]GAYGASVSDEELKR	906.396
H0Y6H0	AAATGNAS[+80]PGKLEHSK	809.883			448104	13475446
P49006	GDVTAEEAAGAS[+80]PAK	727.314	23555410	49630812	20384344
P49006	LSGLS[+80]FK	416.204	15584123	14261295	13737609	18966590	19315440	17225320	21668200	23914266	17750734
P49006	LSGLS[+80]FKR	494.255	117887640	124952224	144686720	129163488	137446592	131316584	33062828	42516600	39453272
P49006	AAAT[+80]PESQEPQAK	704.311	3092579	2778131		16629733	15006978	14952428	5878402	8483458	6455346
B4E322	ELNVS[+80]FINEK	636.797	3811283	4706048		4332634	5388869	4428588	2364630	1457273	1781930
B4E322	MLQAIS[+80]PKQS[+80]PS[+80]SSPTR	1027.92			29146126	23654812	83660624		5422246	15925852	13738028
B4E322	QSPSSS[+80]PTR	513.716		13658292	12325372					339134	5224124
B4E322	ERS[+80]PSPSFR	571.753	15802395		1152641		343728		8675179
B4E322	ERS[+80]PS[+80]PSFR	611.736	281410720	240832496	267777472	339792768	326502528	244554656	246196512	228813072	216584640
B4E322	SPS[+80]PSFR	429.181	88760368	58533320			7882049	82116504		50339440
B4E322	T[+80]SPPCS[+80]PANLSR	723.778	198508240	201144848	375292960		231910752	220617840	76716240	209048016	171868192
B4E322	TS[+80]PPCS[+80]PANLSR	723.778	196837520	200816256	375420832		232812752	221230016	76539968	208242592	171743344
B4E322	AAAYDIS[+80]EDEED	704.245	77569256		72899984	37188904	34430784		29991678	59780868	42676216
Q12888	SEDMPFS[+80]PK	559.217	100338456	101445360	117171984	126725072	137111024	123726128	41243696	53023888	45914820
Q12888	TVSS[+80]DGCSTPSR	667.258	20614852	20905578	25370870	21933836	23064786	21201620	25827548	29817750	24174580
Q12888	TVS[+80]S[+80]DGCSTPSR	707.241	294808	412832		364292	311021	331221			5727421
Q12888	STPFIVPSS[+80]PTEQEGR	906.414	658323392	653166976	669960960	747919040	780303104	739639680	462728032	386115264	357946976
Q12888	NS[+80]PEDLGLSLTGDSCK	886.874	183748256	233001504	300627232	254771200	237945792	224694032	180623488		140790976
Q12888	SEALS[+80]S[+80]VLDQEEAMEIK	1019.92		9175357	20496220	18437328	6461330	10441427		5922365
Q12888	VDVS[+80]CEPLEGVEK	770.834	19133564	21156994	23293684	32253380	30529222	30885440	11242457	13596876	11652657
Q12888	TSNS[+80]LTEDSK	581.237	15271274	6797219	10723772			19590638	607252
Q12888	KNGSTAVAESVAS[+80]PQK	827.396	172904528	215376864	244424032	195250016	194512096	153357312	75978880	88655232	44806468
Q12888	NGSTAVAESVAS[+80]PQK	763.348	103692888		87781936	90528648	85281328	92137920	42743312	38800676	42547212
Q12888	SEDPPTT[+80]PIR	596.766	183839904	46326288		447022304	234711760	233183264	76771864	104529128	88027816
Q12888	TSS[+80]GTSLSAMHSSGSSGK	874.861	189826544	175057408	200730512	158727984	169074432	128327944	37751624	39552776	43094268
Q12888	TSS[+80]GT[+80]SLSAMHSSGSSGK	914.845	69626872	77729216	86010816	57580456	60094360	53604996	20428368	23314414	20825482
Q12888	TSSGT[+80]S[+80]LSAMHSSGSSGK	914.845	70352128	80555592	89402072		62452848	51202976	20132792	23596606	20835250
Q12888	GGPGKLS[+80]PR	474.737	303014496	315098176	221130128	328779008	279805760	277047776	103381192	157208416	126254944
Q12888	AADIS[+80]LDNLVEGK	712.837		26811442		36254456	38978108	33461778	10390026		10660141
Q12888	SNVSSPATPTASSSSSTT[+80]PTR	1051.97				13720038	4015039	8136324
Q12888	KITES[+80]PR	455.723	28588190		25440100	29091488	29595980	26512876	7362994	14921305	10935882
Q12888	KLITS[+80]EEERSPAK	784.39
Q12888	LITSEEERS[+80]PAK	720.343		42102912	48366568	38204880	49234312	44174428	21574732	19626590	19241520
Q12888	LITS[+80]EEERS[+80]PAK	760.326	11647024	15943701		35043116		26737400		6384349	4789733
P67809	NYQQNYQNS[+80]ESGEK	884.844	63186100	80218208	86142208	101434872	103285752	85324408	107000424	124148248	118586864
P67809	NEGSES[+80]APEGQAQQR	834.336		134913552	119453728	113389864	125495632	106805096	153727600	187817536	158727936
P67809	NEGS[+80]ES[+80]APEGQAQQR	874.32	17402470	19947478	21713702	20538554	21050800	20930678	26956410	29459244	25054424
P67809	AADPPAENSS[+80]APEAEQGGAE	989.389	533528448		665438592	474500800	546768064	440965984	212354736	285191232	261254976
B3KUF5	GSS[+80]LADQR	457.192	5512442	672384					659165		1109784
B3KUF5	LPNLSS[+80]PSAEGPPGPPSGPAPR	1081.52				68991048	60297272	60585952	60859264	58695364	57502016
P12270	GAILSEEELAAMS[+80]PTAAAVAK	1055.51				76669328		92650608		20900496
P12270	EGVQGPLNVS[+80]LSEEGK	861.901				36382996			942286	21957452	807285
P12270	TVPST[+80]PTLVVPHR	742.387		1155737		50050648	49844732	39610336
P12270	TDGFAEAIHS[+80]PQVAGVPR	966.454	253825312	262908384	238535744	390997472	428862336	450566944	209049392	237384960	291269024
P16383	AADSSDS[+80]DGAEESPAEPGAPR	1048.41	12361040	9876112	11251426	9698388	9684951	6998346	1474041	2714286	2224299
P16383	AADS[+80]SDS[+80]DGAEESPAEPGAPR	1088.39	30754112	22969350	32046426	26646014	26852034	21548826	3960996	6190838	4925982
P16383	AADSS[+80]DS[+80]DGAEESPAEPGAPR	1088.39	29984502	23427030	29918386	26521220	25767340	23276916	2909363	4761687	4921159
P16383	RES[+80]EDDPES[+80]EPDDHEK	1037.35	58003148	61432164	64444708	52943844	59198960	50124328	36567304	42246088	25667142
P16383	ESEDDPES[+80]EPDDHEK	919.318	72890592	61388472	75475624	66075652	68842936	64911260	22746164	44484296	30368384
P80723	S[+80]DGAPASDSKPGSSEAAPSSK	1006.93	22308156	38158708	38237080
P80723	SDGAPAS[+80]DSKPGSSEAAPSSK	1006.93	32319692	39778164	38728800	44243752	32979182	29602820	25092716	28017418	31045076
P80723	SDGAPASDSKPGS[+80]SEAAPSSK	1006.93	34422124	19511208	24150856	33516460	30272626	23421886	29589598	25100620
P80723	SDGAPASDSKPGSSEAAPSS[+80]K	1006.93			4857263	33984156		19170102
P80723	SDGAPASDS[+80]KPGS[+80]SEAAPSSK	1046.91	13015455	13917773	13987753	10241802	9794094	10563524	3598984	3909745	3079817
P80723	ETPAATEAPSS[+80]TPK	733.824	382441536	448475744	437749568	502362368	430727200	479097728	243587328	252213248	214730800
H0YB24	S[+80]VASNQSEMEFSSLQDMPK	1097.96
H0YB24	SVAS[+80]NQSEMEFSSLQDMPK	1097.96
H0YB24	SVASNQS[+80]EMEFSSLQDMPK	1097.96
H0YB24	ADSWVEKEEPAPS[+80]N	819.838		15669242	28361014	14570040	27492126	27668580	10353824	13339414	10577337
H3BQZ7	S[+80]GDETPGSEVPGDK	727.788						152145520	258803136	287419072	244279808
H3BQZ7	SGDET[+80]PGSEVPGDK	727.788	129528896	126166744	56846984	163569232	179570480	60389256	257501456	288956576	241395184
H3BQZ7	SGDET[+80]PGS[+80]EVPGDK	767.771	26693794			34143564		32178612	28999732	32639838	29263612
H3BQZ7	AAEEQGDDQDS[+80]EK	751.27	11768128	5447037						21878206	18356342
Q32Q62	ATNES[+80]EDEIPQLVPIGK	960.454	4673699840	4827714560	5092859904	4068355840	3901171968	3686184192	2190585344	1651490560	2195000576
Q32Q62	KS[+80]PAKS[+80]PNPSTPR	763.842	13098238	15706353	13935537	19377098	18589450	15511828	7999022	9323218
Q32Q62	AAESET[+80]PGKSPEK	705.811		280276640	302208576	425647424	490096544		301814272	411749216	292043616
Q32Q62	AAESETPGKS[+80]PEK	705.811		267814384	348048064	421512128	458063008	467066720	295446656	417643168	287826816
Q32Q62	AAESET[+80]PGKS[+80]PEK	745.794		9296308		11091581			10771532	12340552	8758329
Q32Q62	AAESET[+80]PGKSPEKKPK	882.432	62292872			71637824	50227	45755932			7955402
Q32Q62	AAESETPGKS[+80]PEKKPK	882.432	46786504	31041252		70564648	57602736	55628428	7652523	12121064	6531385
Q32Q62	EKS[+80]PSLGK	463.223	240929600	299952000	164574720	272490400	309049280	186999440	167970240		175738368
Q32Q62	EKS[+80]PSLGKK	527.271	36746156	35682340	26242820	34872960		29624952		2935814	3811521
B4E106	SKAS[+80]LEK	421.705		227997632			120579632		14297971	58456892	32844996
B4E106	EEETS[+80]IDVAGKPNEVTK	963.441	39473348	31407890	42305472	41917380	44200176	8760439	22877948	30998764	27467798
B4E106	AAES[+80]PDQKDTEGGPK	805.341	4776607	5220194		5846566				4224914	2999098
B4E106	DTEGGPKEEES[+80]PV	727.29	326461248	353728224	318875360	370568032	341372064	325690400	265464608	294616064	215818800
Q9BY89	TSS[+80]PLFNK	487.223	11530779				6845398	6514215			3630088
Q9BY89	AAESPS[+80]PR	447.689	93307632		71847648						44415780
Q9BY89	GGSSVEAPCPSDVT[+80]PEDDR	1027.9						45779100	39606452	51163100
Q9BY89	VHSEAIS[+80]PAPEEK	737.335				270239712	19116368	15758033	5966698	8172872	82050528
Q9BY89	MS[+80]PSGGAPQTTPTLR	790.861				27484344	31527986	29380210	7801368	11543503	8697364
Q9BY89	S[+80]PTVEPSTLPR	632.303	25641828	31430650	35349604	39212256	38268748	29598978	17804258	25718974	19365318
Q9BY89	VSPKS[+80]PPTDQK	632.303	31331752	5670835				38891908	15398559	18497304
Q9BY89	KEES[+80]DEEETASK	731.285	124770064	121609040	115360832	111133224	121001136	105484584	64339160	92858992	71841552
Q14978	IT[+80]PVTVK	419.228		3330076	2797601	4853577		5681984	3484545		3774098
Q14978	S[+80]PAVKPAAAPK	558.794	59209300	57268004	60325208	63797144	67715360	59778704		70324776	58434368
Q14978	VAGGAAPSKPAS[+80]AK	646.324	53623836	64552180	69617232	67477912	74428184	67718480	34602588	45805376
Q14978	VAGGAAPSKPAS[+80]AKK	710.371	16166139			17927902	17736120	12597515		5370685	2570788
Q14978	GKGS[+80]PRPQAPK	601.806		774988224	504080992	642523392	567060160	635128960	159746016	153776480	202425712
Q14978	GS[+80]PRPQAPK	509.247	314516224			509465216		353558176	220647072
Q14978	AAKNS[+80]EEEEEEK	736.793	738303488	757404544	603505216	730739072	731671040	673412864	770844800	1006990016	796145152
Q14978	AAKNS[+80]EEEEEEKK	800.841	230471744			10358815		3434359296	1065975168	76707176
Q14978	NS[+80]EEEEEEKKK	729.803	296228352	282998048	279536320	276351648	310206752	249952800	219238032	261105152	237898752
Q14978	EAET[+80]PQAK	477.202			9604374				2041734	974872
Q14978	LQT[+80]PNT[+80]FPK	603.254	228130096	192201952	264741312	201857600	212969280	201087872	61210660	107840208	96465008
Q14978	LQT[+80]PNT[+80]FPKR	681.304	25079174	21788058	36802456	23355914		23314234			7884197
Q14978	RAS[+80]SPFR	450.708	102522776			155006864	159294752			92684496
Q14978	RASS[+80]PFR	450.708	1584547072	1553167872	1250148992	150879408	163489072			166002656
Q14978	RAS[+80]S[+80]PFRR	568.742	171515856	177169344	154624928	131578696	138624592	124021072		578990	38583456
Q14978	ASS[+80]PFRR	450.708	1549478272	1532865536	1565613184	1616365824	1642292736	1529498880	699665344	850113728	703140736
Q14978	VADNS[+80]FDAK	523.713	193334448	166650736	186700016	220340144	206493296	228502464	121886152	154585088	135920288
Q14978	VADNS[+80]FDAKR	601.764	150687680	160994112	163613104	163181280	160290528	139303728		37174280	29956734
Q14978	GGSISVQVNSIKFDS[+80]E	873.901			32792160
P62258	NLLS[+80]VAYK	494.249	13726167	12998505	15368628	14836224	13564855	15844858	7210164	6278735	5132453
P62258	AAFDDAIAELDTLS[+80]EESYK	1084.47		20291456				23934770	37548008	21880492	34130668
O75385	NLQS[+80]PTQFQTPR	748.848	17106716	21003220		18436406	19712622	17383814	10244102	13027928
O75385	SGSTS[+80]PLGFAR	580.261	8414679	9403972	10542514	10052509	11136021	9660617
O75385	NPLPPILGS[+80]PTK	657.347	27036730	24422650	33331576	37713084	38179780	34488864	19056458	11833785	19305508
M0QZ22	MGLLS[+80]PSGIGGVSPR	754.371				4257404					1005324
M0QZ22	HALTS[+80]PSLGGQGR	680.822		6569559	8474877			21800034		11724841
M0QZ22	HALTSPS[+80]LGGQGR	680.822		6743234	8819151		20598276	21796122			6747344
Q86UP2	EIQNGNLHES[+80]DSESVPR	995.929	152032224	97557552	126004504	99430320	79221960	77480400	45627560	70592320	63323892
Q86UP2	QPT[+80]PPSEAAASK	632.284	21125290	18411712	8867952	2547503
Q4KMP7	AAGGAPS[+80]PPPPVR	627.306	66902532	12117253						30109450
D6REM1	SS[+80]GLVQR	413.695						9327722		5191387	4987638
D6REM1	AAGGGAGS[+80]SEDDAQSR	758.289	23942578	26718210	25413446	21953708	22958380	21317348	11094825	14752128	11254158
D6REM1	AAGGGAGSS[+80]EDDAQSR	758.289	21983558		23529258	30425702	28367812	18242534	6167221	11829182	9532751
F2Z357	SQS[+80]MDAMGLSNK	674.767		14976809	17833346	19235966		15681840
F2Z357	RSS[+80]AIGIENIQEVQEK	940.959	3388784	6607757	7812827		8804420	8669685	6414775	9487589	5569170
F2Z357	RES[+80]PPAGQK	525.242				496025		792527
F2Z357	SENSSTQSS[+80]PEMPTTK	895.861	9801852	9293532				8097783
Q4LE74	AAGMSS[+80]PGAQSHPEELPR	951.414	9675477	12364678	1156786304	12558311	1475728000	16248140		5069388
Q4LE74	SPLEHSS[+80]PEK	595.758	150017712	131475272	454629					2302022
Q4LE74	SPLEHSS[+80]PEKEAPS[+80]PEK	1004.92	3207012
Q4LE74	VSPPAPGS[+80]APETPEDK	829.869		3834246		58274496	6264137			1013179
Q4LE74	VSPPAPGS[+80]APET[+80]PEDK	869.852	19395252		13186513	42615496	100782168			72160976	62771908
Q4LE74	VQEKPDS[+80]PGGSTQIQR	903.923	45086396	43524756	49177244	135379904	128609352	116280184	50159996	53826744	47174916
E7EPN9	SFS[+80]SQRPVDR	629.782	18140562	177373184	18649660	152292944	4988550	4328865	98942072	109937568	2043015
E7EPN9	LPDLS[+80]PVENK	596.286	50820832	38599672	50425188	65147204	67071572	60715460	42810368	47706660	43277812
P04049	RAS[+80]DDGKLTDPSK	735.335	17821546	17111166		26229604	28086724	24353076			94425
P04049	S[+80]TSTPNVHMVSTTLPVDSR	1054.99	109889120	90335528	100549296	98211584	88581408	92245200		45442564	40826552
P04049	SAS[+80]EPSLHR	532.232	321520992	327069888	280403616	322686496		452500736	252500416	311175296
P04049	AAHTEDINACTLTTS[+80]PR	969.425	47264232	39527096	46102408	80138480	77023624	72396760	30903988	43710832	25193226
Q9H2Y7	ELSTS[+80]PCNPIVR	726.831	68229608	62395804	75827120	56373892	63467128	51777184		35946516	31607066
Q9H2Y7	S[+80]LSESSVIMDR	652.284	53348808	41000584	51517528		41798932	35603836	34887228	38767864	33716340
Q9H2Y7	SLS[+80]ESS[+80]VIMDR	692.267	29310440	26465806	41042684	15162033		18744766		6018599	7702057
Q9H2Y7	RATGDGS[+80]S[+80]PELPSLER	916.385	30259274		155420352	32410232	22805758	20782124	27038226
Q9H2Y7	RATGDGS[+80]SPELPS[+80]LER	916.385	63299452				22583136	106240656	5933201	27022566
Q9H2Y7	RAT[+80]GDGS[+80]S[+80]PELPSLER	956.368	22299934	17284884				13160196	9375098	17074414	14955117
Q9H2Y7	ATGDGSS[+80]PELPSLER	798.351	39683488	16178871	36547788	28473162	24015940	27555756	6571269	14643592	7080045
Q9H2Y7	NRENS[+80]PSSQSAGLSSINK	978.445	26573610	39307856	49354616			39139704	567701	21753538	437702
Q9H2Y7	ENS[+80]PSSQSAGLSSINK	843.373			5836700		17550020		21322260		25019514
Q9H2Y7	GS[+80]KQDAAGHIER	674.804	263242848	582034	434190	184193136	196971936	159239520		471582	561222
H0Y6J6	RPDPDS[+80]DEDEDYER	909.329	597460288		791812544	504700960	543430272	484624640	412463328	463745344	433630720
H0Y6J6	RPDPDS[+80]DEDEDYERER	1051.9	113609904	139366528	113800600	74203512		65964204		1435995
H0Y6J6	S[+80]MGGAAIAPPTSLVEK	804.889	4358907	2966413	1499668	3801580		3578073		2144256	1619511
C9JIG9	RVPGSS[+80]GR	448.211	129913696	217307136	181377648	188503728	169309904	164324912	143104192	183229408	148434080
C9JIG9	TAQALSSGS[+80]GSQETK	766.335	40969428	40488680	39106716	34555872	36674004	40085460	20537824	22350770	19035472
C9JIG9	TAQALSSGSGS[+80]QETK	766.335	40813652	40354584	39429292	34505972	36600680	39905564	20153400	22301348	19100180
C9JIG9	TAQALSSGSGSQET[+80]K	766.335	40951344	40626484	39416424	34508292	37037696	39803092	20414660	22670244	19469078
S4R3H4	KSSSISEEKGDS[+80]DDEKPR	1037.45	10655911	9178291	11631766	24211632		3378846	1750760	2392624	2509948
S4R3H4	KS[+80]SSISEEKGDS[+80]DDEKPR	1077.44				22182764
S4R3H4	KSS[+80]SISEEKGDS[+80]DDEKPR	1077.44	66095400			39079744	74553760	72606000
S4R3H4	SSSISEEKGDS[+80]DDEKPR	973.405	525174720	483019680	454143520	410052160	459428256	368079968	150000144	242173328	181500800
S4R3H4	S[+80]SSISEEKGDS[+80]DDEKPR	1013.39	31550270	31097672	29925882	54143772	56324780	50473072	23927582	29168508	24398952
S4R3H4	SSS[+80]ISEEKGDS[+80]DDEKPR	1013.39	31053088	31000622	30841832	55563068	57125492	51439056	24789010	29144874	24379462
S4R3H4	LS[+80]EGSQPAEEEEDQETPSR	1099.44		3665256					11587358	20307852	14748319
S4R3H4	LSEGS[+80]QPAEEEEDQETPSR	1099.44	1500059					16759862	662413	20247350	1051527
S4R3H4	LSEGSQPAEEEEDQET[+80]PSR	1099.44	5626520		2529902
S4R3H4	TRS[+80]QEQEVLER	727.835	107869472					150033328	8361787
S4R3H4	S[+80]QEQEVLER	599.261	29199902	35908912	36052780	30851984	29994420	26946762	13302868	19232032	16998888
S4R3H4	TTS[+80]PLEEEER	635.764	53731680	53009064	59557488	65250552	70029552	64434156	44849500	56658628	45800420
S4R3H4	EKS[+80]KS[+80]PS[+80]PPR	676.756	97757432	136184912			138134064		102519504
S4R3H4	SKSPS[+80]PPR	468.221		11733639	9080670	461954176				5938312	578124992
S4R3H4	S[+80]KSPS[+80]PPR	508.204	525093312	336016704			802045888	584498880	203851712	452364672	339151584
S4R3H4	SKS[+80]PS[+80]PPR	508.204	525889792	336709408	846970176	700069312	677883136	588656256	199866272	452288032	341445856
S4R3H4	S[+80]KSPSPPRLT[+80]EDR	815.355	133308616	859554944		1361420672	1164847360	1246687744	686149376		559736064
S4R3H4	GITEECLKQPS[+80]LEQK	920.432	2851665	12177966				11089063	463895		612886
S4R3H4	KSLS[+80]PGVSR	505.755		34053272	34887656	35157396	34108572	38493012	6857203		11331939
S4R3H4	KS[+80]LS[+80]PGVSR	545.738	100365632	109097088	110602016	95062464	102221744	92472064	52722952	68117288	57896800
S4R3H4	SLS[+80]PGVSR	441.708	69995808	59699780	75610704	72806872	74473368	68062800	41699988	46577068	45482104
S4R3H4	S[+80]LS[+80]PGVSR	481.691	34859284	40959552	36481332	21734090		24759342	23975374	27294060	25394084
S4R3H4	ERTS[+80]TSSSSVQAR	738.328	28654202	20973980	821286	63571204	63817560	57157996	22402864	30143438	22446344
S4R3H4	RLS[+80]QPESAEK	612.785	2067380992	2165730560	2135886592	2276175872	2096587136	2155813888	996262592	1382192768	1106082944
S4R3H4	RLS[+80]QPES[+80]AEK	652.768	6682060								698475
S4R3H4	LQPERGS[+80]PK	546.266	1595501824	1629097728	1560813824	1605103232	1664722944	1508664320	470541728	627351488	528913472
S4R3H4	KIS[+80]VVSATK	506.776	30748082	26551966	25895110	44274084	46361936	41137912	14471856	15509148	13689974
S4R3H4	GVPAGNS[+80]DTEGGQPGR	789.831	303563328	304699168	346710432	267988208	266265504	220308976	146084000	184711392	184980800
S4R3H4	GVPAGNS[+80]DTEGGQPGRK	853.878	51427160	54300144	56653296	31916520	39971060	30306918
S4R3H4	KPS[+80]ISITTESLK	692.36	4741897	3691573		2767280		2248401		861555	2405366
S4R3H4	IS[+80]EDETER	529.706	16803840	19357412		34724360			67968096	83662176	65404636
S4R3H4	TAQVPS[+80]PPR	516.747	1332988672	1003819328	194413680	1976243584	2033687936	1636595200		1339746560	1056520384
S4R3H4	TAQVPS[+80]PPRGK	609.306		17349126
Q9UPT8	TGSGS[+80]PFAGNSPAR	693.296			67709288		50570668	47279912	15484745	29813452	22369678
Q9UPT8	TGSGSPFAGNS[+80]PAR	693.296	47961764	51262540	57012336	85709664	94665040	76744320	39480712	75467608	63930032
Q9UPT8	TGSGS[+80]PFAGNS[+80]PAR	733.279		100511448	108795344	118296608	145878256	75127200
Q13428	LAS[+80]TNSSVLGADLPSSMK	929.437			57415204			145217168
Q13428	TVANLLSGKS[+80]PR	661.845	173766096	195977488	192414976	175339360	185371600	174717632	37365448	49624576	43679836
Q13428	ASSVSTKES[+80]PAR	650.301	242293712	351357248	223313760	377582912	370820992	305952832	176023104	242909792	184339440
Q13428	ASSVSTKES[+80]PARK	714.348	69036232	63661184	61506844	43324276	59781112	60757448	13398488	18922904	15963906
Q13428	AASAPAKGT[+80]PGK	568.279	9240416	541370				6984527
Q13428	TSQVGAASAPAKES[+80]PR	818.888	692732736	721082816	705218752	675066944	659456576	573163712	190391536	267419232	200380816
Q13428	AASAPAKES[+80]PR	582.774	1231385088	1434557056	1189732992	1247865216	1274481792	1194325632	473758624	685671424	522905472
Q13428	AASAPAKES[+80]PRK	646.822	44404864	41446172	43158064	44376168	35699108	35682052	11712418	17392774	15314817
Q13428	VGPAT[+80]PSAQVGK	596.292	17397486	16112406	15222603	35988012	37890680	34243748	18023974	20767742	18790638
Q13428	AALAPAKES[+80]PR	595.8	848594176	814820352	823101824	899691008	459689344	431214016	279963200	374089536	330977280
Q13428	AALAPAKES[+80]PRK	659.848	19069806			17173402	17312184	14402796	5923461	6895701	6488100
Q13428	KGAAPT[+80]PPGK	502.252	71906176	63949532	81483512	85208800	61410392	58540288		38822624
Q13428	SPAGPAATPAQAQAAST[+80]PR	915.431	220742784	213333440	256812112	237489760	255823136	228980624	54469320	92263632	69453832
Q13428	LDSS[+80]PSVSSTLAAK	721.842	380924288	410339360	475652064	402124448	402166848	371474656	178295776	251517376	223099008
Q13428	QEAKPQQAAGMLS[+80]PK	832.397	50422104			79216728		53048732	42471556	73142168	67042724
Q13428	EAASGT[+80]TPQK	535.232		123307880	56005380			139596272		23132400	30018674
Q13428	EAASGTT[+80]PQK	535.232	79525712		69059480	229059280		140395056			30702690
Q13428	RKLS[+80]GDQPAAR	639.819	3815097	535727	12940351	14215158	20812344			2819627	2437307
Q13428	KLS[+80]GDQPAAR	561.769	1777755136	1892258432	1982569472	1906213504	1966430720	1821478656	987072576	1355195136	1101147264
Q13428	KLGAGEGGEASVS[+80]PEK	798.369		122003464	69148496	98552672	91015856	131689144	67214536	72668408	71359704
Q13428	LGAGEGGEASVS[+80]PEK	734.322	34755324	316092544	321731648	255105680				281503616
Q13428	LGAGEGGEASVS[+80]PEKTSTTSK	1036.97	144491904	208703776	218529760	140932352	130755504	132905496	15991794	21088022	21107924
Q13428	LGAGEGGEAS[+80]VS[+80]PEKTSTTSK	1076.96	11037858	16928178	12631798				8897001	168452
Q7L014	QDGGQNES[+80]FKR	673.28	2072095872	2022864768	1534040192	1285149184	1504560000	1632392320	754989824	994226432	634475840
P18858	EWNGVVSESDS[+80]PVK	806.848	104128720	89238056	113002960	114891944	113363800	108154008	77767832	92029272	86714072
P18858	VLGS[+80]EGEEEDEALSPAK	920.398	258434096	215621120	284751424	261221328	243913968	248159968	129048024	156892336	143688704
P18858	VLGSEGEEEDEALS[+80]PAK	920.398	260583696	256525824	356390528	292720096	343909952	394560832	132282136	156707072	140346064
P18858	VLGS[+80]EGEEEDEALS[+80]PAK	960.382	511414560	431970336	603454464	417837536	405696576	374426240	214513264	286473312	254267296
P18858	TIQEVLEEQS[+80]EDEDR	950.396	45508228			116930512		129445520	116018088	123512864	111524040
P18858	AET[+80]PTESVSEPEVATK	877.89	91307520	145216864	163867216	172091888	179821456	139291888	62448232	114609504	100873904
P18858	AET[+80]PTESVS[+80]EPEVATK	917.873	24802770		44932712	25667344	21488446	31682748	39823756	49764332
P50914	AALLKAS[+80]PK	489.773	699342144	691145152	719533248	529877344	528475616	510431104	199764528	232695184	199921136
A0A087WY61	QAAS[+80]PLEPK	510.742	25585026			68219288	71538704	63601952	41842560	47048936	36833980
A0A087WY61	TQPDGTSVPGEPAS[+80]PISQR	1002.46	2179250176	1736504448	2336244224	2786291712	2402600960	2712756480	1241377280	1640399488	1389667584
A0A087WY61	RVSLEPHQGPGT[+80]PESK	899.928		6108541	3780490
A0A087WY61	VSLEPHQGPGT[+80]PESK	821.877	278134624	278511744	257267360	270871488	266789200	204071216	44694756	78680672	54038952
B2R6A3	SAS[+80]SDTSEELNSQDSPPK	979.897	237830208	263870112	313715008	234320048	308212992	322867776	317163872	434411776	304952704
B2R6A3	SASSDTS[+80]EELNSQDSPPK	979.897	226995856	266163040	306891488	270023648	301866656	270233216	291177504	438712800	291081984
B2R6A3	SASS[+80]DT[+80]SEELNSQDSPPK	1019.88		23982868	30544758	21192102	17082744	17918956	28250930	38092812	30065522
B2R6A3	SASSDT[+80]S[+80]EELNSQDSPPK	1019.88	21502712	23928532			17468072	17854998	28193068	36955816	32802982
B4E1P9	AALQTAPESADDS[+80]PSQLSK	998.449		21109698	23123812	13261142	13601717	13311121	3478081	4436681	5054977
D6W5C0	KLT[+80]GMER	457.712		158249		8536920		875931	340048	676106
D6W5C0	RRPPS[+80]PEPSTK	666.327			172989	14452751	16804024	11672977
D6W5C0	RPPS[+80]PEPSTK	588.276	398036480	930570816	483251936		801169408	563173376	368907232	401295968	564629760
D6W5C0	GEQVSQNGLPAEQGS[+80]PR	917.41	225909760	207323536	244042656	206895680	154541024	189782416	123263688	259332784	174204640
D6W5C0	TSS[+80]KES[+80]SPIPSPTSDR	918.377	15503102	51413144			144898672				35970228
D6W5C0	TSSKES[+80]S[+80]PIPSPTSDR	918.377					15151276	3477034	214173344		5128515
D6W5C0	TSS[+80]KES[+80]S[+80]PIPSPTSDR	958.36	389853664	464158368	444557216	310807552	323260192	299216896	154116144	243526912	187811408
D6W5C0	TSSKES[+80]S[+80]PIPS[+80]PTSDR	958.36	364834112	320604768	402373792	275688448	316805856	304685152	152394800	273127456	165823888
D6W5C0	TSSKES[+80]S[+80]PIPS[+80]PTSDRK	1022.41	520912448	561187200	515805376	433191232	561490432	415576192		139964416	145298096
D6W5C0	ES[+80]SPIPS[+80]PTSDR	716.773	60031636	66506280					45314452
D6W5C0	AQT[+80]LPTSVVTITSESSPGK	991.988			708382	7950959	501838	2918737	482323	7812423
D6W5C0	AQTLPTSVVTITSESS[+80]PGKR	1070.04	111594056	104450240	118434488	103320352			25211270	28048540	27848302
Q6IEH8	SPQPVCS[+80]PAGSEGTPK	839.861	14917111	22677460	53849992	51017160	42652152	52755452	15439675	16751138	13387946
Q6IEH8	SPQPVCS[+80]PAGS[+80]EGTPK	879.844	19190112	23921048	42860352			7432305
Q6IEH8	SPQPVCS[+80]PAGSEGT[+80]PK	879.844
Q6IEH8	DVPPDILLDS[+80]PER	773.363	11554994		4512185				2044817
Q6IEH8	AAMYDIISS[+80]PSKDSTK	897.405	73896680	55024876	76596640	79488656	67683528	81872448	28487916	25816090	29433758
Q6IEH8	GESRPET[+80]PKQK	668.816					4846065
Q6IEH8	S[+80]TVNEKPK	491.734	15655512	115781				7194084		287873
Q6IEH8	AITSLLGGGS[+80]PK	590.802		288585440	347199616	283439008	297752224	266580496	153114656	174838624
Q6IEH8	NNTAAETEDDES[+80]DGEDR	974.34	25013252	27670396	28158112	23962824	24298348	24335700	22449264	26583852	21217354
Q6IEH8	NNTAAET[+80]EDDES[+80]DGEDR	1014.32								12770745	11110822
Q5VZL5	VTQHES[+80]DNENEIQIQNK	1053.46	70423184	57159252	69292048	63650740	64553156	61766008	22450246	38913896	28537280
Q5VZL5	ENS[+80]KETFSGK	603.756			66069152	66131176	65888304	59922296	22286924	29406362	23427118
Q5VZL5	CGGVEQASSS[+80]PR	657.761	205035536	113888000	101864984	90956952	89197856	81680720	47930656	55635668
Q5VZL5	AKSEDS[+80]DVELS[+80]D	727.752				67072784	430681	566801	17102920
B7Z3Y3	S[+80]VSTMNLSK	523.733	16373083	16791350	17723064	13664765	13690592	11744290	4743255	5126735	9720162
B7Z3Y3	SVS[+80]TMNLSK	523.733	30388298	25254312	31737008	25242078	25571144	21739438	7278234	12209236	9718219
B7Z3Y3	RLSS[+80]SSATLLNSPDR	842.407	4197872		6660321	7053658		4693480
B7Z3Y3	RLSSS[+80]SATLLNSPDR	842.407	5596173		5300831	7080689	6668113	4013873		2677284	527826
B7Z3Y3	LSS[+80]SSATLLNSPDR	764.356	45598992	43490752	65859544	41004600	11200701	41337488	12757295
B7Z3Y3	LSSSSATLLNS[+80]PDR	764.356		35862772	38275424	19420466	18225492	29746252	13890320		12508219
B7Z3Y3	LQLS[+80]PWESSVVNR	797.885	11405562	15648915	18313342	18762272	22081436	17287738	12152130	9100446	11437517
B7Z3Y3	RAVS[+80]PSNPK	518.253				143938
B7Z3Y3	AVS[+80]PSNPK	440.202	148607088	143803440	166748384	148154480	130687576	84893136	52058496	77882344	64217928
Q9H6L6	AAPEASS[+80]PPASPLQHLLPGK	1024.51					45227376		16253575
Q9H6L6	AAPEAS[+80]SPPAS[+80]PLQHLLPGK	1064.5	869469888			1091374848	1133053696	1264956288	606348864	560813120	192019680
Q9H6L6	AAPEASS[+80]PPAS[+80]PLQHLLPGK	1064.5	871249856		821892672	1521691520		1138421888	702370880	562090496	700808192
A0A024QZH6	QRS[+80]PS[+80]PAPAPAPAAAAGPPTR	1064.49	142908688	171691648	156989152	110602440	174338128	132237896	42439200	81422088	66754096
A0A024QZH6	S[+80]PS[+80]PAPAPAPAAAAGPPTR	922.411		14517280		11031155
A0A024QZH6	S[+80]AS[+80]PPPATSSSSSSR	783.298	55282224		28574100	50851576		106303536	39813476	51012568	16242521
A0A024QZH6	GPSPAPASS[+80]PKR	616.295			17122116		22826696	18918526		11606865
A0A024QZH6	GPS[+80]PAPAS[+80]SPKR	656.278	113869744	111363280	129108696	183870992	187505328	164933280	60063324	84328960	59146148
A0A024QZH6	GPS[+80]PAPASS[+80]PKR	656.278	106522696	115012720	112355672	41021608	171747184	160324368	60173808	86242360	59143020
A0A024QZH6	REVLYDS[+80]EGLS[+80]GEER	949.882	45125528		51435160					35349540	26836400
A0A024QZH6	EVLYDS[+80]EGLS[+80]GEER	871.832	116558944	95895720	96917536	72581624	64315520	85715720	64879840	78916880	76797992
A0A024QZH6	S[+80]PFLKPDER	584.774	30687890	114260464	145114560	107500464	89426840	94977784	45195276	80565136	64900816
A0A024QZH6	GAEETSWS[+80]GEER	709.267	100720856	66083136	85465720		78226952			39780020
A0A024QZH6	AAPPPPALT[+80]PDSQTVDSSCK	1059.97				69110352	71439384	61864080		7426740
A0A024QZH6	AAPPPPALTPDS[+80]QTVDSSCK	1059.97	61351232			64225952	76163224	22421686
Q5T4S7	AAPPPPPPPPPLES[+80]SPR	892.443	65145352	12127599	88032616		29492906	7672813	14496493	15844797
Q5T4S7	HAS[+80]T[+80]SSPADKAK	680.271		511540			212186	765748	146148	802961
Q5T4S7	HAS[+80]TSS[+80]PADKAK	680.271	77523064	72887264		78721688			66101
Q5T4S7	HVTLPSS[+80]PR	537.261					125830600		80548264	73686104	88863672
Q5T4S7	S[+80]NTPMGDKDDDDDDDADEK	1089.37	39849632	47438408	53005064	50612440	45207128	40905096	26501474	32388266	37701232
Q5T4S7	SNT[+80]PMGDKDDDDDDDADEK	1089.37	41623628	46775004	53349176	48288844	39746716	41093140	26071466	33187748	38724092
E9PF10	AAPQS[+80]PSVPK	531.255	214515792		295914656	396195200	423136544	381557952	213198672	225796432	214237008
E9PF10	AAPQSPS[+80]VPK	531.255		182224192	247397952	341116608	287727488	370300256	187190224	194714432	188324928
Q86U86	TPS[+80]NLAAAR	490.732					5078611	5424084	527969
Q86U86	TYS[+80]QDCSFK	608.223				44587652	38237160	44684560	9063461	15914583
Q86U86	AAQQQQPSAS[+80]PR	674.804		40876276	40867580			19527418	13407914	14385159	11172444
Q8NHG8	S[+80]LGGAVGSVASGAR	634.803	28338198			36384840	35501932	33928732			34507096
Q8NHG8	DRPVGGS[+80]PGGPR	616.283	195790064	218496656	208800080	216411344	216790352	205031424	97188992	140236944	108643872
B2R8R5	SRS[+80]GEGEVSGLMR	722.816	2243482624	2141613056	2359182080	3884231680	4068138752	3743862784	808381504	1039771584	831541184
B2R8R5	S[+80]GEGEVSGLMR	601.25	388082624	374382272	468002272	647703488	676626368	587324864	243619488	353857088	284427136
B2R8R5	LDLDLTADS[+80]QPPVFK	869.919						4374882	6827458
B2R8R5	LS[+80]PANQR	433.2	148901664	159628128	145114496	153307856	123373976		48797548	74505776	74277672
B2R8R5	LSPPYSS[+80]PQEFAQDVGR	979.438	16294290	29304584	3647409	15263796	4625468	1567711
A8K4T9	AAS[+80]AIYR	416.192	8978423	13557592	5976812	12575478		14968615	6503817	6966220	6009878
A8K4T9	GRLS[+80]PVPVPR	579.313	929758528	903313152	862484160	709948928	814921088	728899712	273142272	393207968	259277424
F5H672	AAS[+80]ALLLR	447.744	1614980	1586613	878298	2365332	1798273	1646895	1111433	1673135	1160919
F5H672	ELS[+80]APAR	412.189	30057880	33844800	30886330	32146404	31817900	30632194	16007871	18681062	16746108
B4DIA5	AASDPLLSSVS[+80]PAVSK	804.898	73905984		69212640	52993620	68005744	65032796	37627164	40108036	28948304
B4DIA5	RSS[+80]FSMEEES	634.729
B4DIA5	RSSFS[+80]MEEES	634.729
Q9BUU2	AAS[+80]DSNPAGPLR	618.274		28907282	29656868	29763824	23342916		9419385	12871384	9539560
Q96RK0	RTQS[+80]LSALPK	590.808	1945108		16779310				5805804	11419916
Q96RK0	TQS[+80]LSALPK	512.757	35231592	27936290	34334096	32367576	32518110	30832288	12824551	17335950	15093831
Q96RK0	AAS[+80]EDMTS[+80]DEER	750.734			25348688
Q96RK0	KVFS[+80]PVIR	513.281			2387522	5476765	3842474	4455196	1808145	2623357	2538879
Q96RK0	S[+80]SPPLPPPAEER	678.813				5391009		4252276
Q96RK0	SS[+80]PPLPPPAEER	678.813	111680864	75359544				79659304		80701392
Q96RK0	KNS[+80]TDLDSAPEDPTS[+80]PK	981.392	58968016	41152040			93823352	80228680	13183557
P85037	QS[+80]PGPALAR	488.734	127269392	130968168	141091872		130851632	124843952			65695628
P85037	AASEQQADT[+80]SGGDSPK	814.825
P85037	S[+80]APASPTHPGLMSPR	793.363	135623424	132744288	131020176	98302928	108304360	82958344	60897096	91270136	68438048
P85037	SAPAS[+80]PTHPGLMSPR	793.363	69417360	101872696	77102464	84469584	129258920	104041040	60298072	91274832	70012840
P85037	S[+80]APAS[+80]PTHPGLMSPR	833.346	1880826112	1806387584	2179305472	1220292224	1257975040	1131986304	380125216	435513408	423930080
P85037	S[+80]APAS[+80]PTHPGLMS[+80]PR	873.33	186977008	200107040	265298480		275188928	156074096	66865392	74932120	76479624
P85037	SGGLQT[+80]PECLSR	692.8			68405960	44689808	59254828	17993882	16044705
P85037	SGGLQTPECLS[+80]R	692.8	78167536	85284528	99117544	87026480	85450160	86792800	59298804	124924608	93737672
P85037	SGGLQT[+80]PECLS[+80]R	732.783	48396168	77021744					35110688		41656124
P85037	EGS[+80]PIPHDPEFGSK	788.838	318377600	276954176	300039744	391289568	417760800	377892320	185638304	247946768	205592352
U3KQ26	AASEQQADTSGGDS[+80]PKV	864.36		25672434	22946788	41482356	13062549	4517451		3825650	16615126
F8W7U3	AGNS[+80]DS[+80]EEDDANGR	798.746	8934081	22857694	17726104		3609627			10940532	10883228
F8W7U3	S[+80]RPTSFADELAAR	750.846	107115064	82316048	103599256	84859616	88895736	84279432	46053136	44201340	55137708
F8W7U3	SRPTS[+80]FADELAAR	750.846				89121832	91719368	81509792	41654996	55257288	30619610
F8W7U3	S[+80]RPTS[+80]FADELAAR	790.829	333350080	291153888	345016640	394403616	432606656	388711712	221954272	234796736	215526960
F8W7U3	SRPT[+80]S[+80]FADELAAR	790.829	345707808	343668288	347056544	398146816	413212736	390337568	217073552	249438976	215492128
F8W7U3	RTPS[+80]DDEEDNLFAPPK	955.912	293086592	324585376	246195760	222484992	243921664	258133104	157644240	167950704	178822416
F8W7U3	RT[+80]PS[+80]DDEEDNLFAPPK	995.895				32483302	37306444	31172672	16515418	12752371
F8W7U3	TPS[+80]DDEEDNLFAPPK	877.861		10645938	40359732			7585193
F8W7U3	LTDEDFS[+80]PFGSGGGLFSGGK	1027.94	51501184	41179496	47623820	181638032	179184976	169854640	88694664	60617972	101514632
F8W7U3	EPQKPEQPT[+80]PR	693.824								1973303
F8W7U3	VQS[+80]TADIFGDEEGDLFK	975.922	3467426		2852852			16263649	10975065	6922484
F8W7U3	AVAS[+80]PEATVSQTDENK	863.88	26356346	45651572	56852844	54378176	49211304	64671164	21896694	40796416	31649244
F8W7U3	KTS[+80]LFEEDEEDDLFAIAK	1090.49			5948760		31384020			3183443
F8W7U3	RLAAQESS[+80]ETEDMSVPR	993.435	8204648	681102	10508214		10570800	14343823	1421703
F8W7U3	LAAQESS[+80]ETEDMSVPR	915.385	28172134	28132154	33714988	27602646	25775422	28593470	15826025	21799166	19007356
Q9NSK0	RTS[+80]QEGPGDSVK	670.796	9171626	48841100	20321954	41180772	42001240	38442692		27688476
Q9NSK0	AAS[+80]LNYLNQPSAAPLQVSR	1040.51	198542240	172842528	219106256	202718032	198025120	149638304	98968176	86624376	78257888
Q9NSK0	GLS[+80]ASTMDLSSSS	661.763	29889688	38272236	56439888	38891932	41151040	36653496			21067214
E7EX73	ITKPGS[+80]IDSNNQLFAPGGR	1026.5		6285365			13813575	1805519			11172256
E7EX73	SSLS[+80]RER	457.708	112077656	131056880	109244400	160662032	163314064	146711008	29647234	39411216	29486898
E7EX73	RS[+80]FSKEVEER	673.809	2848417	9385033	30656032	6473838			6237817		8184033
E7EX73	RS[+80]FS[+80]KEVEER	713.792					36338536	46184068	2620788		64660568
E7EX73	S[+80]FSKEVEER	595.758	1104112128	1108152064	1168326656	1036240512	1062216960	958577728	91799784	116256440	111533736
E7EX73	SFS[+80]KEVEER	595.758	409903488	419863904	492187744	351879328	387777696	360605952	245201216	378756608
E7EX73	S[+80]FS[+80]KEVEER	635.741	35580140	33269210	43202592	25993508	24066870	21234146	19839454	32269716	27605618
E7EX73	S[+80]FSKEVEERS[+80]R	757.308							38771164	40641056
E7EX73	KAAS[+80]LTEDR	535.748	19378460	18036474	34015080	44177036	44769056	41382140	39970124	50464668	40745100
E7EX73	KAAS[+80]LTEDRDR	671.312	80907472	119417024	103596488	98977328	100349624	86303256		28988494	26374382
E7EX73	AAS[+80]LTEDR	471.7	20608772	23769904	22799398	28373942	22574132	22611662	29883954	38530628	32462080
E7EX73	AAS[+80]LTEDRDR	607.264	506553472	496128384	484554688	555546176	562234944	542691008	194744384	245661616	194091776
E7EX73	EAALPPVS[+80]PLK	601.315	81372832		102929416		305499136	263294768	186476160
A7MD96	S[+80]PPSYSVLYPSSDPK	852.382						42177632	39809760	40087260
A7MD96	CPS[+80]PTMSLPSSWK	779.328					22159312		10414077	13971686	4668940
A7MD96	CPS[+80]PTMS[+80]LPSSWK	819.311			24324938		10032628	4651289	1845091	12877
A7MD96	S[+80]PLPAGPSSCTSPR	747.326		13126939	35994640	6542380	47854536		13528356	20605800
Q9H6H8	AAS[+80]PHQVTPQADEK	779.849	9794198	32866252	31320272			24429080			10320364
A8K4U4	AAS[+80]PPASASDLIEQQQK	910.925	211316416	159944896	141488784				67863448		79383304
B4DSL6	AAS[+80]PPKPLLSNASATPVGR	957.496	122157496	59088868	53592988	143475600		117726240	35424804	55965856	44562248
B4DSL6	QNS[+80]VQEQPGTACLSK	863.877				2079570		1112795
B4DSL6	TPIS[+80]PLK	418.22	32748502	44069436	40389804	37720000	40854824	36209736	16711835	31654876	22496464
B4DSL6	QDTSSS[+80]TTHLAQQLK	862.896
B4DSL6	TQS[+80]LPVTEK	541.76	87663416	93127072	92321192	88971688	89945944	84816144	52002812	80183736	62846660
B4DSL6	SDES[+80]PKPGK	512.721	7409436	17035582			20625594	16476934	7233580	9284349
B4DSL6	NKAS[+80]PQSEFMPSK	765.837	20753284	15571759	24822070	33758292	36427008	40152296	15672476	16490482	18628708
B7Z7U0	RS[+80]S[+80]PVRR	509.223	334473824	414967680	482611648	485625920	141641056	484049792	82253960	144612512	115400920
B7Z7U0	KEKT[+80]PELPEPSVK	781.397				15566563	6901263
B7Z7U0	EKT[+80]PELPEPSVK	717.35	581659200	549548352	743094208	458895808	645086784	480173472	103634576	377680800	280311168
B7Z7U0	T[+80]PELPEPSVK	588.781	21086248		28176616			19885546	7716336
B7Z7U0	VPKPEPIPEPKEPS[+80]PEK	989.5	4611152	114024760	250945216
B7Z7U0	RLS[+80]PS[+80]ASPPR	614.268	1165393920	1406156160	1385846272	833368512	998294784	719103488	469966976	590521024	524298976
B7Z7U0	RLS[+80]PSAS[+80]PPR	614.268	1174455936	1474202880	1118713344	850858112	954393152	716212992		601312640	544383424
B7Z7U0	RLS[+80]PS[+80]AS[+80]PPR	654.251		2375655424			1615675136	1489748864	908534848
B7Z7U0	HRPS[+80]PPAT[+80]PPPK	721.323	778406976	404464288		195142224	304657344	574724352	121986104	195798512	160701408
B7Z7U0	TRHS[+80]PTPQQSNR	744.839	134822400	156039392	137165168	137616448	134531424	127000520	72511904	67625208	72903520
B7Z7U0	TRHS[+80]PT[+80]PQQSNR	784.822	309017248	319431520	288766944	246529552	273580608	230810928	54708732	63581744	60805504
B7Z7U0	HS[+80]PTPQQSNR	616.264	99723048	110274064	81447544	80692176	24474682	77564432	30413918	62290536	48372884
B7Z7U0	VS[+80]VS[+80]PGR	431.167	337119360		286264896	303854848	287139552	295948960	216390832	228730240	210176096
B7Z7U0	VS[+80]VS[+80]PGRTS[+80]VTK	729.296				8263018		19819186	8246939
B7Z7U0	RES[+80]PSPAPKPR	651.322	76997920	231163216	214615808	285030208	303610624	278412000	84693920	134069696	104925904
B7Z7U0	RES[+80]PS[+80]PAPKPR	691.305	801301824	1116676096	896890304	1292978432	918544064	1200270720	375204640	505203168	335639584
B7Z7U0	ES[+80]PSPAPKPR	573.271	20728580	21281562	25847932	29477388	26865162	23926234	9084866	13419717	10748513
B7Z7U0	KVELS[+80]ESEEDKGGK	807.867	64727736	44463684	55682660	67183040	60100220	66420568	19521506	34122648	30614406
B7Z7U0	KVELS[+80]ES[+80]EEDKGGK	847.85	1988479232	2048923264	2030986496	2011365376	1908694144	1905561984	852695296	1167574656	888309568
B7Z7U0	VELS[+80]ESEEDKGGK	743.819	1510464			8075502	7272263	3786902	2777354	3434325	2948256
B7Z7U0	VELS[+80]ES[+80]EEDKGGK	783.802	18156888	20689796	16281036		15368900	14332056	13816252	16876878	13298842
B7Z7U0	RWQS[+80]PVTK	541.263	32985396	31186234	37035552	40629796	43847812	38766772	21493888	20523236	19627522
B7Z7U0	WQS[+80]PVTK	463.213	320852224	391518624	310121312	356039168	385123744	329792736	186083152	213705120	195846240
B7Z7U0	RRS[+80]PS[+80]PPPTR	655.792	121628784	158172352	97249832	693731392	253710960	288094176	192080048	79284536	271731136
B7Z7U0	RS[+80]PS[+80]PPPTR	577.741	141427936	179339328		35709420	12665239	152554848	59165184	27264004
B7Z7U0	S[+80]PS[+80]PPPTR	499.691	96683272	286679936	204971152		81690968	126667424	369754080	46879228
B7Z7U0	RRS[+80]PS[+80]PAPPPR	689.313	590216448	661426496	636094528	637202176			335632064	257843712
B7Z7U0	RS[+80]PS[+80]PAPPPR	611.262	240658352	84715104		54134452	422074112				3707773
B7Z7U0	S[+80]PS[+80]PAPPPR	533.212	395216160	152448576	578405888	257377456				60054552	161783808
B7Z7U0	RRT[+80]PT[+80]PPPR	619.284	286641280	357766464	335968960	317524864	252831904	236588304	141998320		152792864
B7Z7U0	RT[+80]PT[+80]PPPR	541.233	27312626	37117392	36941236		19909046	20255048	19550352		1025881
B7Z7U0	T[+80]PT[+80]PPPR	463.183					7159322			14803223	12776879
B7Z7U0	RRT[+80]PS[+80]PPPR	612.276	651058880	738288768	627694208	616890816	643349696	468466496	73092432	133933048	238468048
B7Z7U0	T[+80]PS[+80]PPPR	456.175	6109237	12578470			26347328				11359420
B7Z7U0	RYS[+80]PPIQR	548.769	998427200	699538880	1449900544	1348610432	1408575104		560133888	797889088
B7Z7U0	RY[+80]SPS[+80]PPPK	594.746	1135290752	1234721152	1172192640	1068929984	2525201664	2587456256	1169863680	1464353920	1423852288
B7Z7U0	RYS[+80]PS[+80]PPPK	594.746	1063112320	1239322368	1163706496		2584524032	2623681024		1496713600	1424348928
B7Z7U0	RY[+80]SPS[+80]PPPKR	672.797	96611560	100651680	77491720		106011272	86814720	19771768	16070099
B7Z7U0	RRT[+80]AS[+80]PPPPPK	682.318	208552848	30424712		176509200		163584208
B7Z7U0	TAS[+80]PPPPPK	486.234	167908144				170681568		33567312
B7Z7U0	T[+80]AS[+80]PPPPPK	526.217	308461792	114984920	123270144	205676336	229142336		185127984	275206496	88191184
B7Z7U0	TAS[+80]PPPPPKR	564.284	59252416			15426926	17876514		17232918		14559455
B7Z7U0	T[+80]AS[+80]PPPPPKR	604.267	358586400		763756544	145778816	228182448	566182592	278497952		268743104
B7Z7U0	RAS[+80]PS[+80]PPPK	548.733	190790848		295231872	96297424			52745144	13915037
B7Z7U0	RAS[+80]PS[+80]PPPKR	626.784	1789467904	1084306944	856745792	857004224	333670208	876564160	398242336	524253664	497984896
B7Z7U0	AS[+80]PS[+80]PPPK	470.682		18341680		3609894	14333239		8866862
B7Z7U0	AS[+80]PS[+80]PPPKR	548.733	212136160	337143296	387076704	167227232				46601856	74735616
B7Z7U0	RVS[+80]HS[+80]PPPK	582.752	2691602688	2151270400	1406417664	371357312		1484090496	258356640	689514176
B7Z7U0	RVS[+80]HS[+80]PPPKQR	724.832	20564384		29582668		3689646	596648
B7Z7U0	VSHS[+80]PPPK	464.718	65788872	40699192	47306388		21159680			19183470
B7Z7U0	RRSPS[+80]LSSK	549.277	195019840	161824160	152206576	153604912	174501920	159095392	39416196	54121900	50244356
B7Z7U0	EARS[+80]PQPNK	553.753	692824384	947067840	396554752	248958480		470631840	80209696	320292480	69577912
B7Z7U0	RHS[+80]PS[+80]PRPR	625.271	492081408	784314624	717598656	660652864			254283376		245040048
B7Z7U0	HS[+80]PS[+80]PRPR	547.221	243841904	231381376	216250112		198854656	178933680	79247432	137555056	117251288
B7Z7U0	APQTSSS[+80]PPPVR	652.306	1748853760	1193710080	1667648512	2894884608	2714911232	932144576	1280183424	1536631680	595111936
B7Z7U0	APQT[+80]SSS[+80]PPPVR	692.289		107187336	476738976	256115504		419814560	84063648		45301728
B7Z7U0	APQTS[+80]SS[+80]PPPVR	692.289	168187216	106007808	504886144	247028448
B7Z7U0	APQTSSS[+80]PPPVRR	730.356	87565288	116361480		41218688		71131808
B7Z7U0	APQT[+80]SSS[+80]PPPVRR	770.339		2144198				2394705		629909	1073959
B7Z7U0	RQS[+80]PSPSTRPIR	731.37	23252260	49245820	63528048	14825080	28236670	32295440	15712283	20455372	17298402
B7Z7U0	RQS[+80]PSPST[+80]RPIR	771.353	760919744	847671040	1287367936	659640064	1090916480	914546944	463122880	724481856	374187104
B7Z7U0	QSPS[+80]PSTRPIR	653.319	970748		40304540
B7Z7U0	QS[+80]PSPST[+80]RPIR	693.302			212548672	153158720
B7Z7U0	RVS[+80]RT[+80]PEPK	615.276	2633639936	3327709696	2718214400	3008415744	2864030720	2696848128	1351772160	1775906048	1184267648
B7Z7U0	KAAS[+80]PSPQSVR	604.295	255014064	284805728	269813696	253667568	263691680	240974192	118206336	149333344	116926936
B7Z7U0	KAAS[+80]PS[+80]PQSVR	644.278	817545536	689289280	694877056	759591104	786828224	596464000	340263264	453267904	287363808
B7Z7U0	KAAS[+80]PSPQS[+80]VR	644.278	793231616	654721728	721128128	531541504	787571968	602521280	259038256	363687392	285849504
B7Z7U0	KAAS[+80]PS[+80]PQS[+80]VR	684.262	395501920	388592544	429543744	352931808	309129760	395725792	147719984	268282896	164878768
B7Z7U0	KAAS[+80]PS[+80]PQS[+80]VRR	762.312
B7Z7U0	AAS[+80]PSPQSVR	540.248	341215232	452732288	509168032	490808416	470920896	509331872	262577008	329538848	277338240
B7Z7U0	AAS[+80]PS[+80]PQSVR	580.231	764439040	870568640	898162624	620290304	522284480	627963264	373711264	411215104	362183552
B7Z7U0	AAS[+80]PSPQS[+80]VR	580.231		858792768	891487040	505082528	534015200	564998464	324340576	405073056	296455776
B7Z7U0	AAS[+80]PS[+80]PQS[+80]VR	620.214		366704288		345641536	222713360	221878768		225477200
B7Z7U0	SVS[+80]GSPEPAAK	555.247	22559012	26360462	32338478				5061513	6496221
B7Z7U0	SVSGS[+80]PEPAAK	555.247	25247660	4973267	32644220	6623497	6889367	5895426		20993806
B7Z7U0	S[+80]VSGS[+80]PEPAAK	595.231	36784904	36212260	38180456	30764310	33069584	31826154	21766156	24476880	22240698
B7Z7U0	SVS[+80]GS[+80]PEPAAK	595.231	32435250	30247296	49894592	33644992	24048864	27384750		24936394	23530312
B7Z7U0	S[+80]VS[+80]GS[+80]PEPAAK	635.214	47503812		101275960	158833600	139420592		99028736	115350520	106341136
B7Z7U0	KETES[+80]EAEDNLDDLEK	972.902	2899587840	2435333888	3073595136	2963897600	2724940544	2631432704	1472391552	1724865152	1528143104
B7Z7U0	KET[+80]ES[+80]EAEDNLDDLEK	1012.88	905601152	1553984640	1890155264	1346952064	1501906944	1393337728	702443136	734623488	701473088
B7Z7U0	KAQVS[+80]PQS	462.713		392466144
A0A075B797	AAS[+80]QDHVR	482.206	2264372	32395456	14237706	5459619	15307807		3417326	496142
A0A075B797	ALSGTS[+80]PDDVQPGPSVGPPSK	1036.98	87533904	106132688	80323888	82153088	86785408	78241048	57186320	66341080	58808336
A0A024R233	KVQVAALQAS[+80]PPLDQDDR	1016				12400015		14311025
A0A024R233	SRS[+80]WEDSPER	664.767	40083044	42890216	46479564	52941852		50525852	30137992	33451628
A0A024R233	SRS[+80]WEDS[+80]PER	704.75	260418912	277086784	295249696	233840928	240772352	221540096	115272856	127363808	100893592
A0A024R233	SWEDS[+80]PER	543.2	37338908	39749396		39483428		35751112	20955574	30827272	25267714
A0A024R233	GRS[+80]IDQDYER	659.775	354485312	393249952	809694528		318088640		109260904	138177808	118706832
A0A024R233	S[+80]IDQDYER	553.214	29700608			32320022	32484426	27194718	30006216	33410498	24953776
A0A024R233	AYS[+80]PEYR	483.192	115131232	99449688	107603824	127499816	119276248	115801400	54571712	63379984	52132012
A0A024R233	MSYLTAMGADYLS[+80]CDSR	1010.9	6063816	5614970	5882514	6329991	5411734		3520260
A0A024R233	RAAS[+80]SDQLR	542.251	24801546	4632520		35339568	35147272		16601942	23816200	17445058
A0A024R233	RAASS[+80]DQLR	542.251		23396288	4270653	35043648	34826444		16679276	24201804	17517946
A0A024R233	DNS[+80]PPPAFKPEPPK	800.874	105581592		34271836	96810304	16900920	25284536		11774970	153836624
A0A024R233	GSYGS[+80]DAEEEEYR	786.28	88651112	99571464	56102032	63492364	64791520	67603112	50554304	86988240	75278504
A0A024R233	GS[+80]YGS[+80]DAEEEEYR	826.263									3160005
Q86YV5	SAS[+80]FAFEFPK	605.763	1155568	738634			552158
Q86YV5	VSQGSAESLS[+80]PSFR	766.343	9696213	8541028	9737190	12678631	17287482	15529775	5419839	7278799	6741108
E7EMW7	WLDGAS[+80]FDNER	695.277	12932889	8806086		8449692	14938546	13521623	9641487	10526697	9412525
E7EMW7	RIS[+80]QSQPVR	575.79	312400544	321360640	309093824		343777600	280709504	162269360	232088880	182304368
Q14126	VVPSFLPVDQGGS[+80]LVGR	903.961	174479216	149740432	152680640	189206816	163117424	146038272	80159928	63784064	94442720
Q14126	GSSSAS[+80]IVK	458.213	43364420		37965004	45783284	41731508	40942372	19386616	17010398	15337116
Q14126	GQHEMS[+80]EMDGR	678.739				13669560	13420432	11446649			5550906
Q14126	AAS[+80]YTEEDENHTAK	823.323	78991672	83930088	232986144	89611584	92395416	91985680	43125596	54136304	41470512
Q96B36	SSDEENGPPSS[+80]PDLDR	891.347	108725192	102862376	122318096	79589792	81081544	58425380	39598768	65796060	41689676
Q96B36	S[+80]SDEENGPPS[+80]SPDLDR	931.33	26049994		131336840		20157884	42902864	61041216	100989888	73193672
Q96B36	S[+80]SDEENGPPSS[+80]PDLDR	931.33			114639968	65401936		15467955	61085508	113766608	72026000
Q96B36	SS[+80]DEENGPPSS[+80]PDLDR	931.33			105008248	65402776		38457288	62537840	113735720	71565464
Q96B36	LNT[+80]SDFQK	516.724	33204498	37481076	29999686	63952504	75976536	68703064	47187080	53377852	46989476
Q6WCQ1	MEVDRS[+80]PGLPMSDLK	877.896			6870918	47130060			23999278	21735674
Q6WCQ1	SKS[+80]NPDFLK	558.26
Q6WCQ1	SKS[+80]VIEQVSWDT	729.829			23133100				13361067
O94761	AATKS[+80]PQPTPGR	645.814	13435309	13704295	12572759	11740717	12646267	11098664	3978969	5316688	3981160
O94761	VGS[+80]PQPSSSGGEK	648.777	19596584	412031	19390378		474399		6227852
Q92766	ANS[+80]GGVDLDSSGEFASIEK	981.92	8970404		7932914			2425548
B3KMN2	AAVGQES[+80]PGGLEAGNAK	818.372	134930480	136929712	75041792	129372320	180637392	132894296	45211500	79066912	65225108
Q9NR30	SDAGLES[+80]DTAMK	652.757			11669818	18879172				24800974	20114094
Q9NR30	KKAEPSEVDMNS[+80]PK	820.373			5220096
Q9NR30	KAEPSEVDMNS[+80]PK	756.326	20184968	67797456	73800400	22662646	41699676	32230972	42799284	45101064	47561644
Q9NR30	AEPSEVDMNS[+80]PK	692.279			7133179		15806747			25825976
Q9NR30	KKEEPSQNDIS[+80]PK	790.372	485544320	522980640	524304128	258724848	347494848	334405600	186271600	278310592	173362832
Q9NR30	KEEPSQNDIS[+80]PK	726.324	28188552		23291146	29021544	1048029	6760693	13995274		13552570
Q9NR30	EEPSQNDIS[+80]PK	662.277	8889541	52862576		10882976	21337518	11099273		42077480	42398044
Q9NR30	VTKNEEPS[+80]EEEIDAPKPK	1060.49	39585744		34341072	10967553	23005684	13955825	2741614	6127280
Q9NR30	NEEPS[+80]EEEIDAPKPK	896.388		773769984	1166268032	743910848			277422144	530170112
Q96ST2	HSENET[+80]SDREDGLPK	897.371	4320826	2126700	4705280		9867086		415961	1448419
Q96ST2	QKDS[+80]DS[+80]ESEER	735.245							3299988	17389314
Q96ST2	HQAS[+80]DS[+80]ENEEPPKPR	940.864	15690073	18632560			28219578		20376982		25429102
Q96ST2	HQAS[+80]DS[+80]ENEELPKPR	948.88	147431264	117656320	149300336	145672352	160381936	135838848	110401832	193989184	164884784
Q96ST2	IS[+80]DSESEDPPR	656.259	62961664	67608016	80517184		85654776	77527072	48446476		46750828
Q96ST2	IS[+80]DS[+80]ESEDPPR	696.242	225447456	234164128	246562128	208687776	256700880	245632496	359120032	388002624	308739968
Q96ST2	VS[+80]DS[+80]ESEGPQK	661.731				7846047	9136289	7431163		18044262
Q96ST2	GPAS[+80]DSETEDASR	701.262	635687				116222328		6673745	6827264
Q96ST2	GPASDS[+80]ETEDASR	701.262	12523869	10963352	3871813		7226794		14217550	22413602	19796392
Q96ST2	FHSS[+80]DS[+80]EEEEHKK	874.814	67895128				46789072	57020620			13330024
Q96ST2	FHS[+80]S[+80]DS[+80]EEEEHKK	914.797				55763504		53502088		36112860	25824086
Q96ST2	MDS[+80]DEDEKEGEEEK	875.306	436351840	417576928	396675200	422518016	440894752	399835456	254257616	314569280	216981072
Q96ST2	MDS[+80]DEDEKEGEEEKVAK	1024.41	34781252	25193524	38551116	28108982	33066388	26496780
Q96ST2	KAAVLS[+80]DS[+80]EDEEK	790.81		9825162				820983232	44534496		111173064
Q96ST2	KAAVLS[+80]DS[+80]EDEEKASAK	969.411	94543168	107477448	106367136	94569976	87783224	77662288	22441744	27007168	22767208
Q96ST2	AAVLS[+80]DS[+80]EDEEK	726.763							39780428	86075280	65722648
Q96ST2	AAVLS[+80]DSEDEEKASAK	865.38			2605887						3500386
Q96ST2	AAVLSDS[+80]EDEEKASAK	865.38			60023784		8682961				556716
Q96ST2	AAVLS[+80]DS[+80]EDEEKASAK	905.363	569892096	596863872	584410944	501991040	573087488	473782752	169051760	266349968	176934880
Q96ST2	AAVLS[+80]DS[+80]EDEEKASAKK	969.411	44950152	49717860	32461990	29782512	26065988	26797894	21493194	27997644	22890182
Q96ST2	VVS[+80]DADDS[+80]DSDAVSDK	892.811			12159771	13537924	16501965	14840106	8329286	8046192	8514470
Q96ST2	VVS[+80]DADDS[+80]DS[+80]DAVSDK	932.794	34037464	45740340		67809864	65688844	60140564	9945804	17273596	11234828
Q96ST2	EKTIAS[+80]DS[+80]EEEAGK	827.318
Q96ST2	TIAS[+80]DS[+80]EEEAGK	698.749	52612796	30009370	54365564	49841284	44093468	47097208	59233348	74271664	63773796
Q96ST2	TIAS[+80]DS[+80]EEEAGKELSDK	984.89	393708544	389658016	457570048	389214144	353853952	364506464	230255904	299352864	244096608
Q96ST2	TIAS[+80]DS[+80]EEEAGKELSDKK	1048.94	101236472	81528672	88838728	76077624	61129656	63701340	24907142	33617692	38353872
Q96ST2	EAEDS[+80]DS[+80]DDNIK	749.237			12051477
Q96ST2	EAEDS[+80]DSDDNIKR	787.304	21921672	29539540	30338248	11248293	13868241	17378834	11160376	11945378	10504305
Q96ST2	EAEDSDS[+80]DDNIKR	787.304	10807039	9720407	30328966	1061827	8160067		11305005	11494408	10312202
Q96ST2	EAEDS[+80]DS[+80]DDNIKR	827.287	741115456	715286144	807723584	728726720	599676352	601416256	327338656	393614112	325176448
Q96ST2	RMNS[+80]TGGQTPR	642.779		70690696		179911328	177235840		37446516	50653844	38517932
Q96ST2	MNS[+80]TGGQTPR	564.729	188693632	188464944	177369440	267581680	276391552	208752032	84237904	163330432	125229192
P06733	S[+80]GKYDLDFK	576.752	24075224	22385454		21608152	24677964	20712942	5281234	7797659	7970334
P06733	IEEELGS[+80]KAK	592.284		35609412		37976552	52385768	42970288	18467662	15092576	16964298
B7Z8T5	AAVQELSS[+80]SILAGEDPEER	1040.98	174580720	199181280	174877440	242161632	273896640	215389088	101666400	105851912	95574776
B7Z8T5	AAVQELSSS[+80]ILAGEDPEER	1040.98	163374064	182883056	178288448	216126944	263661552	213976176	101953320	108271440	98700856
B7Z8T5	AAVQELS[+80]S[+80]SILAGEDPEER	1080.96	63333900	72233896		76274040	86073728	55214800	35887732	40319136	34278972
B7Z8T5	AAVQELSS[+80]S[+80]ILAGEDPEER	1080.96	66594264	74054664	86155152	69770328	88960992	58077164	36090952	36700552	34113872
Q9Y3T1	AAVS[+80]PQKR	468.737	60953968	73630528	54992076	43903712	53865016	52725272	23824964	35246320	30229122
P35611	AAVVTS[+80]PPPTTAPHK	777.39		49519500		32567900	41253260	28122514
P35611	SPGS[+80]PVGEGTGSPPK	717.319	145402368	157268160	157113392	162400880	172102768	149717296	78365536	104872784	78090104
P35611	GDEASEEGQNGSS[+80]PK	786.296	114741264	113843760	116966992	104360000	106801064			68006264	42038828
P35611	TPS[+80]FLKK	450.733					28451120			17416852
P00558	ALES[+80]PERPFLAILGGAK	924.985	22890554	13193688	21418322				6926817		4174265
Q96AY4	NTCFS[+80]PDHK	593.223		4680208				1870578	2328969	4709709
Q96AY4	GSISTPNS[+80]PVK	583.776				279566272
Q96AY4	MTLIPSPNS[+80]PFQK	770.367	3107495	570532		8306887	7517982	6778352
O95685	SLS[+80]CLSDLDGGVALEPR	934.927	26079426	20203534	29195294	22140252	25442270	21842616	10365158	8183981
O95685	ACRPPGS[+80]PGR	567.747				19894044	38888312		14994518	17260420	12317688
O95685	ARS[+80]LPS[+80]SPER	630.263	28942328	30196944	22080126		27411100	31524480		13608032	14657602
Q8N5J2	ACSMPQELPQS[+80]PR	790.833	37126188	28857926	36334492	63582044	64168548	56080968	27878244	33540242	31655494
Q8N5J2	VLS[+80]LQGR	426.721	12961672	12343789	13271745	13497803	14533970	12978982	5415856	9304234	5663209
Q5H924	S[+80]HHAASTTTAPTPAAR	828.878	112118776	13334526		16648657	15735795	17230014	35703132	36449340	24145198
Q5H924	DLS[+80]MSEEDQMMR	776.28	38522348	40143420	40898632	65803704	70398384	62359300	21025588		19878506
Q5H924	AES[+80]PEEVACR	614.239	243321952	224598816	244909360	235661952	183515312	120452536	153981888	133227536	162623328
Q5H924	GNDT[+80]PLALESTNTEK	835.369	4487657	2710391	3816747		4750401	4890746	1055662		7297246
Q5H924	GSGTAS[+80]DDEFENLR	789.309	1284807168	1127189504	1303585152	1018266176	1034956544	928509184	540603520	634382144	573200192
Q5H924	DGGS[+80]GNSTIIVSR	671.804	17450236	22664134	29009354	15851623	19108878	11297069		24343018	22793640
Q5H924	DGGSGNS[+80]TIIVSR	671.804	12339960	23364996	28892190	9014531				9001273
Q5H924	AGS[+80]STPGDAPPAVAEVQGR	923.92	180825680	142745472	176195408	134177352	149181072	136152304		98163696	114128304
Q5H924	AGSST[+80]PGDAPPAVAEVQGR	923.92	180053264	147349968	80410096	107423936	115825536	81538368	50806116	85419168	75187984
Q5H924	AGS[+80]ST[+80]PGDAPPAVAEVQGR	963.903			1725488					1709081
Q5H924	LGSSGLGS[+80]ASSIQAAVR	820.904	23240944	20590386	26339848	31786206	36307156	29313506	17383192	20154912	17247794
C9J5X1	ALPLPQS[+80]STC	577.252	33255706	36476400	37789788	23222044		19240728		8039085	12587483
C9J5X1	ALPLPQSST[+80]C	577.252	34078712	36527380	37866364	27303698	26498730	23015134	5415089	29131
Q96HC9	ACTLTVFPPEET[+80]TPSPSR	1035.47		3393881		1220102			6033523	2439547
Q96HC9	ACTLTVFPPEETTPS[+80]PSR	1035.47	5878797			2429154			3953245		2711438
Q53HM1	ADADPSPTS[+80]PPTAR	731.814		16989850	7751928				8185217		6006932
Q53HM1	LLPPVGT[+80]GRSPR	665.356			7328503
Q53HM1	LLPPVGTGRS[+80]PR	665.356			10141169
B1AMX5	GPAPAPQQCS[+80]EPETK	838.853	40214216	38042668	13568307		37175404	30819134
B1AMX5	GPAPAPQQCSEPET[+80]K	838.853
D6W625	LNSEAS[+80]PSR	520.724	103816792	111543960	74711416	120212616	125829376	101843048	82177264	77947240	85427656
D6W625	RGDS[+80]QECSPR	636.245	143136768	124872424	78871904	75635776		67846392		49956120	50365520
D6W625	RGDSQECS[+80]PR	636.245	142974064	121337056	79340880	78087728		66654476		50554568	49217760
D6W625	S[+80]CPELTSGPR	592.244	35622768	35881928	38394872	29637544	28454520	28607274	17652462	30735370	23470902
D6W625	GLLSNHTGS[+80]PR	609.785	10914262	33841388	12727557	8433689			16241995	16784502	17663638
D6W625	ATLTAS[+80]PLGAS	534.752	11480139	12404392	13846903	11207739		11230865	3996219	4417807	3049497
P49327	LGMLS[+80]PEGTCK	636.772	67246320	54424180	71175768	69684016	70490800	77324088	36711968	47136396	40519716
P49327	ADEAS[+80]ELACPTPK	734.805	7583286		7888813			121753920	123366520	195679232	134247472
P49327	ADEASELACPT[+80]PK	734.805	41841284	31199828		106594792	110636640	94813384	123043544	171496864	149320448
A8KAH7	QS[+80]LGHPPPEPGPDR	782.351	34604480	24361866	30866728	91255632	69695488	70930144	28215060	52206376	27244126
A8KAH7	GDS[+80]ESEEDEDLEVPVPSR	1034.92	10896569			9177342	13819515	9947001	16450935	13066983	15437042
A8KAH7	GDSES[+80]EEDEDLEVPVPSR	1034.92			20437654	14366738	14360924	9545108	15976689	13440993	15275993
A8KAH7	GDS[+80]ES[+80]EEDEDLEVPVPSR	1074.9	347581408	418700000	411017632		380366848	236039088	473136576	515169664	443618016
A0A024RAI5	GNKS[+80]PSPPDGSPAATPEIR	979.454			31615450			40535856
A0A024RAI5	GNKS[+80]PSPPDGS[+80]PAATPEIR	1019.44		24435228	27381108	8653269	18260936		4886863
A0A024RAI5	GNKS[+80]PS[+80]PPDGS[+80]PAATPEIR	1059.42					6815774			78635904	60235960
A0A024RAI5	SPS[+80]PPDGS[+80]PAATPEIR	869.858	10129325	16061039		762568
D6RAT0	LMELHGEGS[+80]SSGK	706.3	40441600	51984896		75970440	89165040	77995200	35943832	48342324	37542432
D6RAT0	ADGYEPPVQES[+80]V	685.779	91721792	87661496	96950424	71021552	58370524	62316388	36273736	43953988	39848700
P08238	EKEIS[+80]DDEAEEEK	815.822	243516992	257125120	241098016	327538592	338135200	298412160	355291040	505046208	407817024
P08238	EKEIS[+80]DDEAEEEKGEK	972.902	108848280	93533032	97077520	114155120	118832352	89039232	77670872	124238328	104078120
P08238	EIS[+80]DDEAEEEK	687.253	11343530	12997108	15716973	16658011	18965142	19973704	32811486	35799876	29857016
P08238	EIS[+80]DDEAEEEKGEK	844.333	42253352	31684518	35215812	48739428	48938468	42244712	75411400	86958040	75898528
P08238	IEDVGS[+80]DEEDDSGK	787.791	1738562560	2001789952	1686875648	2228468736	2416254208	1999830912	4082385408	4422842368	3849659648
P08238	IEDVGS[+80]DEEDDSGKDK	909.352	11969346560	13207422976	14608929792	15482518528	17060941824	15363896320	11860629504	15587587072	13776844800
P08238	IEDVGSDEEDDS[+80]GKDK	909.352	12021473280	13597920256	14564037632	15664279552	17223694336	15309528064	12290147328	16238759936	13725993984
P08238	IEDVGS[+80]DEEDDS[+80]GKDK	949.335	105639336	79171744	116006896	119060904	118576344	83493352	104893584	125977288	113094536
P08238	IEDVGS[+80]DEEDDSGKDKK	973.399	8006598656	8703504384	7607921152	9181386752	14951241728	11272564736	4601555968	10232896512	8552472064
P08238	IEDVGSDEEDDS[+80]GKDKK	973.399	8339411968	8380505088	7425198080	9135230976	14929920000	11140206592	4598801920	10232506368	8608076800
P08238	IEDVGS[+80]DEEDDS[+80]GKDKK	1013.38	243341632	250635792	1498187	265822944		247354272	161722272	228398416	208484848
P08238	LGIHEDS[+80]TNR	611.267		19601890			25744628			1806230
P08238	EFDGKS[+80]LVSVTK	695.337	9296305	6889355	7978901	10208091	512565	8365078		3200425
Q09666	DDGVFVQEVTQNS[+80]PAAR	956.925	101494592	105210408	113309368	95256392	98727664	93531032	65525132	70271792	49763216
Q09666	KGDRS[+80]PEPGQTWTR	847.886	705769856	734017088	1070445696	951687680	858459072	643709760	314461152	339504896	275272544
Q09666	GDRS[+80]PEPGQTWTR	783.838	99790280	89530048	89826008	118860176	123102552	105619408	50004020	75841040	66597584
Q09666	S[+80]PEPGQTWTR	619.764	35471620			48923816	39800040	60340368	69287656	100211168	74924200
Q09666	LKS[+80]EDGVEGDLGETQSR	950.42	2492067328	2331496704	2634109184	3307003648	3338511616	3011153152	1373273344	1865481472	1591585408
Q09666	DIDISS[+80]PEFK	615.768	379744416	363137728	399665184	473327744	448904512	448086336	247077744	272392640	250566320
Q09666	LPS[+80]GSGAASPTGSAVDIR	861.907	1225218304	1393592832	1323135616	2282798080	2490995456	1844656128	935107904	1116541440	966297024
Q09666	LPSGSGAAS[+80]PTGSAVDIR	861.907	808107584	840978368	912112000	668447744	607508096	617136576	302762720	393258432	333053056
Q09666	LPS[+80]GSGAAS[+80]PTGSAVDIR	901.89	297001728	387800096	438031360	820713920	873362752	764602368	413465792	528987232	462719776
Q09666	LPSGSGAAS[+80]PTGS[+80]AVDIR	901.89			14806698	3903261			398843712	501344384
Q09666	LPS[+80]GSGAAS[+80]PTGS[+80]AVDIR	941.873			9320231		13589461	19150716			5647963
Q09666	ISMQDVDLSLGS[+80]PK	785.365		274237184	375117344	334855360		435155296		88409312
Q09666	IS[+80]MSEVDLNVAAPK	777.368	45213860	46216592	53198620	79859848	54819472	62361752	37894820	38769216	37660656
Q09666	ISMS[+80]EVDLNVAAPK	777.368	45292612	46110736	48870552	79969912	54538400	54650004	37271176	39864008	37765156
Q09666	MS[+80]LPDVDLDLK	663.307	1688434	1510557		8226822	6488216			2051094	1656396
Q09666	MS[+80]LPDVDLDLKGPK	804.391			5796215	8147796	4740238			370361	124289
Q09666	MPEMS[+80]IKPQK	634.793	33531844	26188660	32530342	20780342	18622598	18182708		61859
Q09666	ISMPDLDLHLKS[+80]PK	837.42		7806118	45937932	127607624	68665048	60551348		14080057	16364190
Q09666	FNFS[+80]GSK	433.676	46889012	79225536	94628488	45560632	49035832	42817492	16234849	31917454	27077696
Q09666	FNFSGS[+80]KVQTPEVDVK	931.44	31259846		53007516	18513124		26928150			3712750
Q09666	MPFLSISS[+80]PK	593.783	122517600	119215952	115568160	204156080	201437664	169585344	67541104	45887204	60014316
Q09666	VSMPDVELNLKS[+80]PK	818.904		504596448	302172896	750127616	409294912	486299264	173521392
Q09666	GPSLDIDT[+80]PDVNIEGPEGK	1016.96	22599132	7279743		24193472		26295696
Q09666	FKMPEMS[+80]IK	595.771	32506176	28046450	28337756	26044012	23029654	20303596	785447
Q09666	MPEMS[+80]IK	458.189	33622280	37226604	37050200	31836876	36570544	29818920		11270235	8173951
Q09666	LSGPS[+80]LKMPSLEISAPK	917.973	4249565		19587068		18171182		3426561		542144
Q09666	FGFGAKS[+80]PK	509.742	52144068	54378820	58757012	68508216	80546488	73751256			3452829
Q09666	VDVKS[+80]PK	426.715	800041472	937491584	773452288	1452964352	1261124224	1126529792	494186848	873570112	743628672
Q09666	MYFPDVEFDIKS[+80]PK	898.404	61257004	18237956	16048577	106146000	85334952	55185580	15975214	6491283
Q09666	FKAEAPLPS[+80]PK	632.82	489890400	602035072	630757568	1107032320	971694848	918862848	350050624	416676192	387080256
Q09666	AEAPLPS[+80]PK	495.239	106400312	106298616	116757288	191590144	160846992	151695216	97854368	149042432	109867600
Q09666	GDLDASVPS[+80]MK	600.254			31690972						7313682
Q09666	VSVGAPDLSLEAS[+80]EGSIKLPK	1089.06
Q09666	IS[+80]APNVDFNLEGPK	790.871	67502688	69081704	78966496	41869968	51588488	49087496	17762782	16333353	21772280
Q09666	GPAFNMAS[+80]PESDFGINLK	987.937	78996448	46175576	56840164	142115088	175726816	104530896	51460752	33912956	53902488
Q09666	GPAFNMASPES[+80]DFGINLK	987.937	39860960	59040580	37143880	127790088	149785728	132802264	52369164	34001384	47119748
Q09666	FNFS[+80]KPK	474.223	44214012	39469156	44279572	24998444	23724380	20696922
Q09666	GKGGVTGS[+80]PEASISGSK	799.875	239792656	245515040	268906496	190899376	215050304	181344224	44201384	53498588
Q09666	GKGGVTGSPEAS[+80]ISGSK	799.875	61918856	58448548	60208120	31074790		34702164
Q09666	GKGGVTGS[+80]PEAS[+80]ISGSK	839.858	12028239	12769282	13116472	10594904	4482986
Q09666	GGVTGS[+80]PEASISGSK	707.317	450845504	513682496	563473280	334815392	349301472	329148608	137008752	260991072	228597584
Q09666	GGVTGSPEAS[+80]ISGSK	707.317	160149168	146637584	168826144	90999904	243715872	95356472	40120492	49636856	31472494
Q09666	GGVTGSPEASISGS[+80]KGDLK	913.93		18944900	25090358			2184723	1614867	2476595
Q09666	AS[+80]LGSLEGEAEAEASSPK	906.899	102293272	11658036	197840928	125743456	189811216	90168528	47534264	42039092	55519040
Q09666	ASLGS[+80]LEGEAEAEASSPK	906.899	100389152	220387216	160843552	130925280	187777424	107334048	47004320	32753158	39300260
Q09666	ASLGSLEGEAEAEASS[+80]PK	906.899			397924384	402780000	556161664	501107136	484308768	539513088	469995200
Q09666	AS[+80]LGS[+80]LEGEAEAEASSPK	946.882	60291920	65685516		53960028	55744240	43650068			9914052
Q09666	ASLGS[+80]LEGEAEAEASS[+80]PK	946.882	70663480	77866008	89317528	60311924	68772360	51416244		24304956
Q09666	GKFS[+80]LFK	453.728	7030991	6715751	6263051		3694691	4165664
Q09666	FSLFKS[+80]K	468.733	6152087	4529983	6876891			1059418
Q09666	HRS[+80]NSFSDER	657.765		99163800	98481624	131111128	114533816	98866320		51490336	33538112
Q09666	HRS[+80]NS[+80]FSDER	697.748	1004910208	1331182720	1148730112	1231645312	1202548992	1077131520	819496320	1121316992	764341888
Q09666	S[+80]NSFSDER	511.185	220894224		242495904	82910696		80460552	27560446	26803042	24303882
Q09666	SNS[+80]FSDER	511.185	216309232	165129744	241388896	82432072		80459968	61865928		67877272
Q09666	S[+80]NS[+80]FSDER	551.168						4226446
Q09666	LKFGTFGGLGS[+80]K	646.326	8029335	7356285	6045211	3420912	1932507	1783438			271054
Q09666	FGT[+80]FGGLGSK	525.736	661001600	644795136	615393216	461724384	496369984	472339616	169831344	196641520	179812352
Q09666	FGTFGGLGS[+80]K	525.736	661313984	652169088	623778240	451432384	499195200	468407776	172575120	195921952	180561328
Q09666	S[+80]KGHYEVTGSDDETGK	895.367			35645220	395169	238387		3430529		5784074
Q09666	SKGHYEVT[+80]GSDDETGK	895.367	26808714	26019142	38527884	14389703	16528371	18076302			5598803
Q09666	S[+80]KGHYEVT[+80]GSDDETGK	935.351		10647857	4744456					5721059
Q09666	GHYEVTGS[+80]DDETGK	787.804	266596688	273256192	282520448	362192160	393270336	343365344	623650880	737198784	645287424
Q09666	LQGSGVSLAS[+80]KK	627.826	81389312	89195112	84979288	46139296	47086476	42237120	16421645	23047766	17162432
Q09666	LQGSGVSLAS[+80]KKS[+80]R	789.376	528303520	289405	457940704		365484608	380834240			5428436
B2RBM8	NVHS[+80]EDFENR	663.759	52671352	60671764	64971128	57126712	57415664		28367274		27190326
B2RBM8	VIPEDAS[+80]ESEEKLDQK	948.927	49105532		62540892	56719292	46729028	62693544	38249752	50901792	48891920
P06748	SIRDT[+80]PAK	484.234	241779200	366172288	364103968	488280032	493056672	442302656	107831592	175338128	126543776
P06748	DSKPSS[+80]TPR	527.732	193490800		212788160	150528096	167320080	205743264	83095528	88442584	85110808
P06748	DSKPSST[+80]PR	527.732	229196768	203703152	213467360	150528096	169265184	297285344	78583984	90595320	92291280
P06748	SKGQES[+80]FK	495.718			10573299	10582445	14921404	10248128		3802862	2622244
P06748	GQES[+80]FKK	452.202			3487140	199754368	220706592	211820704			175711056
P06748	GQES[+80]FKKQEK	644.8		29408244	26944982	19077320	20859378	16312128
P06748	QEKT[+80]PKT[+80]PK	608.772	45495196	22291224			18041284		21207718	20166196
P06748	GPSS[+80]VEDIK	506.223	106889824		109878592	89510720		85911192	42173732	53363844	42317784
P06748	MQAS[+80]IEK	443.691	521299808	565250304	523220480	578938816	608414848	590389504	301152864	390106592	359529472
P06748	GGS[+80]LPKVEAK	533.271	139215200	193867184		112027520	163034128	166291440	44351304		44253404
P06576	ADKLAEEHS[+80]S	583.74
P06576	ADKLAEEHSS[+80]	583.74								2756260	2282435
A0A087X1K6	ADLES[+80]PQRK	562.261	540907264			25066220		19001724
A0A087X1K6	TGS[+80]LSDYSR	533.216
Q8WUA4	DLDRPESQS[+80]PK	676.298	196219120	230772256	256195872	205285472	166786976	137352496	50560512	67015584	61459656
Q8WUA4	VSS[+80]PTKPK	462.234	141784000			228835664	202793472		70705968		119163752
Q8WUA4	AHFNAMFQPSS[+80]PTR	835.861	214622336	218151392	248419136	324127552	263845024	250178560	127578304	171975872	135056448
Q8WUA4	AHFNAMFQPSSPT[+80]R	835.861	198269408	217544192	267314688	322898720	366886560	322502656	151971984	171643472	131723096
Q96C19	RADLNQGIGEPQS[+80]PSR	902.921	186617552	182860848		156323056		135616832	59568216	85585152	71767416
Q96C19	RADLNQGIGEPQSPS[+80]R	902.921	188393424	182595888	185261168	158274080	160805616	142908800	61894344	87176496	73093432
Q96C19	ADLNQGIGEPQS[+80]PSR	824.87			168779712	109002856	105904416			145973888	120989160
Q96C19	ADLNQGIGEPQSPS[+80]R	824.87			168730768				82521120	136494224	104146656
Q9NUQ3	NLVS[+80]PAYCTQESR	802.842	57696812	57382872	62648976	95280744	81230672	80290944	49108180	55036620	57798088
Q9NUQ3	NLVSPAYCTQES[+80]R	802.842			6806639	1216764
A0A024QZ44	ADPHLEFQQFPQS[+80]P	860.872
P62263	IEDVTPIPSDS[+80]TR	755.345		13720648	8408666			5537644	358288		6588345
E9PG73	S[+80]PPKADEK	476.213			13881179		9560255		10347498	11250427
E9PG73	S[+80]PPKADEKER	618.785	20360700		16556650	15822505	117821	137136			30903
E9PG73	RS[+80]ET[+80]PPHWR	663.263
E9PG73	SET[+80]PPHWR	545.229	6807087	4107884	7599169	5097149	8669406	2837303		4541106	3537086
E9PG73	S[+80]ET[+80]PPHWR	585.212	23170308	39081548	22816166	2265954	26685944	25571812	22854168	37467804	31428648
E9PG73	SELNEIKENQRS[+80]PVR	939.957	604261		44258796
E9PG73	ENQRS[+80]PVR	533.245	286540416	322776704	238632160	299463712	99248696	201111536	109828872	351992064	88534464
E9PG73	NVS[+80]ES[+80]PNR	531.686
E9PG73	NVSES[+80]PNRK	555.751	105286984	111124992	88626528	90151760	93337336	89113952	50338368		51358840
E9PG73	NVS[+80]ES[+80]PNRK	595.734			138990976	235189392		130761744	110336648	102584360	109365304
E9PG73	NVS[+80]ES[+80]PNRKNEK	781.324	196559136	258171472	117789592	280832768	193655424	214240928	10380310	14948666
E9PG73	S[+80]RECDITK	544.726			30483372	26225726	26777764	23541848	28218290	40438676	31203438
E9PG73	KADRDQS[+80]PFSK	679.809									460054
E9PG73	ADRDQS[+80]PFSK	615.761	174145280				3815919			2380461	126409656
E9PG73	DQS[+80]PFSK	444.679	234209520	284495104	197812368	263025856	220676240	232382448	180013504	196014976	192121264
E9PG73	IRS[+80]SVEKENQK	699.343	139169008	180935360	49020060	175003856	150592592	131987088	43929132	58400932	54196244
E9PG73	IRSS[+80]VEKENQK	699.343	139332608	181526464	51222108	173598896	150905824	131173440	43804208
E9PG73	IRS[+80]S[+80]VEKENQK	739.326	17754790	20768824	18898158	14010683	15484243	14338920	3430338	10482748	1857239
E9PG73	KFDHES[+80]S[+80]PGT[+80]DEDK	916.297		5431105	8654420	8636768	4289698	3820776	15558309	17320890	13964433
E9PG73	KFDHES[+80]SPGT[+80]DEDKSG	948.34	10406740	25796806	32306912	15120076	21636234	8420819
E9PG73	KFDHESS[+80]PGT[+80]DEDKSG	948.34	9702672	25813504	31360322	17029158	19520246	10056638		4443070
E9PG73	KFDHES[+80]S[+80]PGT[+80]DEDKSG	988.323	92156320	91756792	78957432	89664736	80401632	90576400	37932160	36526888	27049430
E9PG73	FDHES[+80]S[+80]PGT[+80]DEDK	852.249
E9PG73	FDHES[+80]SPGT[+80]DEDKSG	884.293
Q9Y388	APKDS[+80]EEIDDVTR	777.838	6746555				5277856	5583104
Q9Y388	EVQAEQPSSSS[+80]PR	741.317	283439712	293893440	229971968	347270240			139094496	145220576	141047888
K7ELA4	KADS[+80]DSEDKGEESKPK	915.394	629197632	493836800	380807840	480754368	440696064	389581888	160544160	202884880	110043768
K7ELA4	KADS[+80]DS[+80]EDKGEESKPK	955.377	43500988	44783476	35945256		36563452	33850836		14847967
K7ELA4	ADS[+80]DSEDKGEESKPK	851.346	53072108	68019440	46116660	60863328	40881156	38630692	23357626	27428128	25149606
B7Z5N6	ADSEPES[+80]PLNASYVYK	925.398		32946232	26087722	44358816	43890340	46187352		21982218	20865298
F1T0I1	IVNHWAS[+80]PELR	701.337		100414688
F1T0I1	AQQELVPPQQQAS[+80]PPQLPK	1082.54			16876924			24183934		12614290
F1T0I1	EHS[+80]AFGDRPEK	676.785			477797	5537523	898120	5777582
F1T0I1	S[+80]LHS[+80]AHSLASR	663.274	28790460	97760				872294
F1T0I1	S[+80]LHSAHS[+80]LASR	663.274	25953072	29767928	29935480	32324588	31257136	26219914	8298878	13935202	10710436
F1T0I1	S[+80]LHS[+80]AHS[+80]LASR	703.257	11520890	15512090	12042247		10848497	9227644	13081135	15838276
F1T0I1	LLPSAPQTLPDGPLAS[+80]PAR	991.011	202645456	202068144	201785824	338518272	396875104	325216896	176083936	175901360	155878800
F1T0I1	FANLT[+80]PSR	493.229	11253927	5459164	2855379	16838302	18899910	20589790	8499867	11057495	9408303
F1T0I1	ADSGPTQPPLSLS[+80]PAPETK	986.967	253210960	299000544	275183104	416929376	403477312	466254624			161233200
Q14CB2	ADS[+80]HEGEVAEGK	654.759	9981244	3138176			27360876	26645476	8128169	14072276	11082221
A0A087WWC4	T[+80]ISGIPR	412.207	3975663	2604988	2883205
A0A087WWC4	QDFS[+80]PERPK	592.261						31632732
A0A087WWC4	AT[+80]TPSLPSVDNEFK	793.361	2264975	2426014	1748002	9088848		4266631	2220295
B2R9G9	ADS[+80]PVHMEQQSR	732.8	16963190	21742938	18469702	20926518	22293356	20787194	17920046	18003982	16988616
A0A024R077	LVES[+80]PKEGK	533.763				23776794	85867696			55262108	5446792
A0A024R077	GSKPS[+80]PLSVK	540.278	35179748	37185960		33193818		31388392	13571130	16899822	13454523
A0A024R077	AKADS[+80]PVNGLPK	638.818		22463698
A0A024R077	ADS[+80]PVNGLPK	539.252		11428719
A0A024R077	SREQSYSRS[+80]PSR	760.336			19780774	34112300	34985272	44753968		28372764	2166938
Q02952	SPPS[+80]PVER	474.713	7465794	15119422	8633648	12379423		25346076		9327585	4067206
Q53F19	AEAPAGPALGLPS[+80]PEAESGVDR	1086
Q53F19	MISTPS[+80]PK	470.714	40020340	22666438	23807048	38140612	47007536	40293900	29012686	37758188	32703074
Q53F19	MIST[+80]PS[+80]PKK	574.745	56290288	45960196	54573996	51030080	52176740	47750484	14438888	17999432	13708176
Q53F19	ADS[+80]VSSSNIK	544.237		7063468	5844611	10000233	12003307	10475504
P52948	NPMS[+80]DPK	434.667				12396449					9338589
P52948	NPMS[+80]DPKK	498.715	15270423	15656929		856116	518954			9324047
P52948	NLNNS[+80]NLFSPVNR	784.864	178802688	74295840	84644240	273283584	286074912	316449024	194295456	207887968	204306512
P52948	NLNNSNLFS[+80]PVNR	784.864	130198360	52723532	84890008	218220944	271747392	273226080	138616112	162127584	213557632
P52948	DSENLAS[+80]PSEYPENGER	987.392	962422016	932257344	1224875392	873562880	893270912	786091776	538292352	638046784	466595200
P52948	CLIKS[+80]PDR	534.749	24106262	27424138		34749336	36955392	28416900	13237095	25242518	18043164
P52948	YGLQDS[+80]DEEEEEHPSK	986.378	706198528	642208192	570779776	671654016	679536384	619601664	331578464	439890240	380338688
P52948	ADTS[+80]QEICSPR	672.268		77857152	71554632		37480988		34593392	46064564	38997328
P52948	ADTSQEICS[+80]PR	672.268		77483536	63781316		76234408				38046076
P52948	ADTS[+80]QEICS[+80]PR	712.252				17270096	16193470
P52948	TSDST[+80]PDPQR	592.235		28197604	27173080	28241578	26581160	21066882	18086330
Q9NW97	ADVEASPGNPPDRQNS[+80]K	931.407									49702
B7ZLW1	ADVVPQQADPEFPRAS[+80]PR	1030.48	23087282	21420980	24281262	22926814	21337544		5306728	7904747	6541833
B7ZLW1	RPS[+80]EGPQPLVR	658.33	305603232		305037248		291216096		123685640	146831312	126051952
B7ZLW1	S[+80]VHREESCSDSGTK	829.827	3607726	11790850	12016457		1804994	8421461	3940181	5187511	4558665
Q9Y446	S[+80]AVDLSCSR	537.718	112543368	141004048	133299056	83503416	98047304	100996072	31040872	43289036	30442864
Q9Y446	ADYDTLS[+80]LR	567.247	10939122	14388135	15337578	15223320	14498947	15725844	6710942	7656375	6937712
Q9Y446	AGGLDWPEATEVS[+80]PSR	876.385	138334832	141487104	123794376	118560120	123919608	118380296	53309324	45791992	50226764
Q9Y446	LSS[+80]GFDDIDLPSAVK	822.382	199033808	225975840	251266544	245495392	299997600	286304096	160878544	125597920	164032960
Q9Y446	T[+80]ADHHQLR	529.232	2501422592	2404701184	2867479040	2355934976	2551995904	2343038976	1611081984	1611181440	1617447552
P58107	AEAEAGS[+80]PRPDPR	716.814	47679160	62926068	71248440	94979616	94576424	85798712	37265672	31308976	37170856
P58107	QVS[+80]ASELHTSGILGPETLR	1038.01		558466496	549765248	418894656	477966880	534882400		237915376
Q59FS7	KAQAVS[+80]EEEEEEEGK	886.367			8210217			15257740	10323244	12641048	11093399
Q59FS7	AQAVS[+80]EEEEEEEGK	822.32	53679944	65146320	70793704	50679964	60084940	49745476	50167616	79580504	59531592
Q59FS7	AQAVS[+80]EEEEEEEGKSSSPK	1065.44	65522044	68962864	71387392	49003852	44883012	44055884		12075890	2912500
Q59FS7	AQAVSEEEEEEEGKS[+80]SSPK	1065.44	90351944		90973832		69646560	56669612			5751784
Q59FS7	AQAVSEEEEEEEGKSSS[+80]PK	1065.44	91338528	71851904	73263824	59883772	72724672	63507276	21370500
G5E9Q4	EDS[+80]GTFSLGK	560.732	56397960	58665816	61593804	75577920	83781824	69020136	35009720	52286264	46001664
B2R9U2	AKES[+80]WEMNSEEK	774.308	41367200		5156796	43185104	6671358	5384793	11229361	13351611	13157297
B2R9U2	SNT[+80]AGSQSQVETEA	744.796					778927	2428222		1509080
B2R9U2	SNTAGS[+80]QSQVETEA	744.796	86107944		58040072	85407448	85278576	66830952			44862852
B2R9U2	SNTAGSQS[+80]QVETEA	744.796	86084656	77355512		1877669	85404776	66809152		574675	43829636
Q07157	S[+80]VASSQPAKPTK	640.816	12699633	13624728	17155090		20041474	12944608	9364133	10920788	10037782
Q07157	S[+80]VAS[+80]SQPAKPTK	680.799			392410
Q07157	S[+80]VAS[+80]S[+80]QPAKPTK	720.782	5683701	15319868							23701106
Q07157	HS[+80]PQQPSNGSLR	694.309	95968912	100615616	102013616	80943536	91073120	77698888	50685932	71292688	52658700
Q07157	S[+80]REDLSAQPVQTK	769.864	132586720	117211096	142278096			474193056	23440084	28455754	28103552
Q07157	IDS[+80]PGFKPASQQK	741.853				28722394	6697634	24981468		8033812	6783457
P07355	LS[+80]LEGDHSTPPSAYGSVK	962.938		39351332		44806376				13906885	7811590
P07355	LSLEGDHST[+80]PPSAYGSVK	962.938	32914838	34575324	54148528					24362766
P07355	LSLEGDHSTPPSAYGS[+80]VK	962.938		51282756	50804124		53901356		17238230	14508899	13960904
P07355	GLGTDEDS[+80]LIEIICSR	929.419			5274486	2405797	9658412		5799250	1011589
Q9BU76	AEDQT[+80]ESSCESHR	808.288	34983952	36742148	22521710	30567750	35480900	29295358	31277392	38909756	29287420
Q9BU76	AEDQTES[+80]SCESHRK	872.336	16474026	20193100	11276677		13596861	9840053	2323616	7671341	448241
Q9BU76	AEDQTESS[+80]CESHRK	872.336	16238931	20365334	11322387	12380205	13554515	9915384	5054353	8027757	5829481
Q9BU76	RPAEAT[+80]SSPT[+80]SPERPR	949.912	297880832	308711488	244215984	288028416	287458208	254104224	110373936	131591888	103535456
Q9BU76	RPAEATSSPT[+80]S[+80]PERPR	949.912	299398240	312198112	298947648	288220256	285170624	256152256	111576568	130928672	104747328
B4DZC3	NS[+80]PGSQVASNPR	647.283	146471088	182332256	169572400	131763648	135446512	135156320	60589024	74913072	64507724
B4DZC3	RKAEDS[+80]DS[+80]EPEPEDNVR	1066.91	66659632	60036232	64540688	53429704	52875628	51253048	12689763	2232640	13479896
B4DZC3	KAEDS[+80]DSEPEPEDNVR	948.878		26994290	93585344	21802240			8011692		9822975
B4DZC3	KAEDS[+80]DS[+80]EPEPEDNVR	988.862	741054784	1066376960	921274880	616312640	790843200	691325696	415186496	499579712	410771040
B4DZC3	AEDS[+80]DS[+80]EPEPEDNVR	924.814	113614464		90516176			79420488	55978844	71758520	57071452
B2RTX8	RPES[+80]PSEISPIK	710.348	147958	87145128	117364184				35651600	46271268
B2RTX8	RPES[+80]PSEIS[+80]PIK	750.331	100055024	94233392	131536648	127963368	122718776	131372912	119177304	141043760	129850416
B2RTX8	RPES[+80]PS[+80]EISPIKGSVR	949.942	290138656		309757056	233109984	251884912	237466816	53813316	86513584	76127344
Q15651	EGTAPS[+80]ENGETK	650.259	28443534	37183936	31267114	37742708	32492892	33206560	29394290	35579004	40901008
Q15651	EGTAPS[+80]ENGETKAEEAQK	978.415	60632564	49034524	59128652	45266368	50802640	42324612	18839518	32810154	27460564
Q15651	AEEAQKTES[+80]VDNEGE	858.336	27461848				29526264	30987618	787600		923762
P27824	QKS[+80]DAEEDGGTVSQEEEDR	1094.93	49773316	46007636	28082498	21027472	20992822	20749092	21830374	27035786	21935472
P27824	QKSDAEEDGGTVS[+80]QEEEDR	1094.93	948531	2297460		344067		21005834	1251164	27043514	1945339
P27824	SDAEEDGGTVS[+80]QEEEDR	966.853	22010880	25151678		10933042	10938666	13640677	43740948	46722432	42194884
P27824	AEEDEILNRS[+80]PR	754.841	3225692416	3590397952		2907780864	2657808896	2448118528	1150823680	1900712704	1651454720
O43719	RSDS[+80]VSASER	587.248	1123204736	1067112192	1045615808	1316834944	1382024064	1287580032	337319168	632783616	444888992
O43719	RSDS[+80]VS[+80]ASER	627.232		164799744	40191804	121005528	237093920			48114608	766044
O43719	SDS[+80]VSASER	509.198	440587808	476159456	417314432	549998144	528411872		224842224	330492704	280134464
O43719	HFS[+80]EHPSTSK	618.756	416829248	450098912	395499296	460321280	452184384	388840192	148404576	223812528	179306384
O43719	HFSEHPSTS[+80]K	618.756	412331040	450599168	398076768	474537280	370575200	279611520	130568392	221170544	158624192
O43719	HFS[+80]EHPS[+80]TSK	658.739		123806248					143472
O43719	HFS[+80]EHPSTS[+80]K	658.739	123776392	39443552	97553488	130087472	121884080	53293236	119253216	79766056
O43719	HFSEHPS[+80]TS[+80]K	658.739	72329760		76261128					48791812
O43719	HFSEHPST[+80]S[+80]K	658.739	103325656			115655040
O43719	TEDGGEFEEGAS[+80]ENNAK	932.349				11430384
O43719	ES[+80]SPEKEAEEGCPEK	893.348		185445280	201399152		209437168	174660224	182013152	190806768	164139984
O43719	RGFEGSCS[+80]QK	618.247				29323464	27025970	26170254
O43719	GFEGSCS[+80]QKESEEGNPVR	1038.92	10597398	17209156		13746278	15681441	14641701		10658644	9560870
O43719	ESEDDLNKES[+80]EEEVGPTK	1057.94	14868857	12198819		18874136	18536680	17267546	5532026	17520366	9358186
O43719	DLDEEGS[+80]EK	551.203								31886544	28281060
O43719	DLDEEGS[+80]EKELHENVLDK	1089.98			5132504	4233763		4756918	2212827	8719863	8458221
O43719	VLDEEGS[+80]ER	557.227	16423594	15615964	25245024	19619262			31153276	36198096	31811770
O43719	LFEES[+80]DDKEDEDADGK	961.365	34573464		12365095				41279632	60398896	52585584
O43719	LFEDDDS[+80]NEK	646.24	20048482	13946825	21459380	23494160	24307196	22055742	55928368	81899184	64033384
O43719	LFDDS[+80]DER	538.7							8156936	16860042	10384025
O15014	FCDS[+80]PTSDLEMR	769.289	28836762	28140970	33105778	30570904	31287000	27268646	12802718	15158772	11853753
O15014	FCDS[+80]PTS[+80]DLEMR	809.272		603217	33747664	24911372	25854748	21135754		10196655
O15014	TNS[+80]MGSATGPLPGTK	749.834	52117676	56069720	61855076		76304928	51081428	30137048	35056976	30087350
O15014	NCPS[+80]PVLIDCPHPNCNK	1051.44	618434944						210855088	289922528
O15014	LVEPHS[+80]PSPSSK	672.813	37069908	39990552	38994848	49844128	45737180	42294792	18582398	24573238	20566130
O15014	APS[+80]LTDLVK	512.26	3246079					1852798
O15014	SKS[+80]PTISDK	521.744	41572268	39482252				34265184			13062217
Q9UK58	AEEKS[+80]PISINVK	697.85	264045936	258122352	273629600	280392512	290832896	270963104	97857328	140400544	105000536
Q9UK58	AEEKS[+80]PIS[+80]INVK	737.833	24269858	23477460	30134262	29737146	13128301		8738910	11293876	5008380
Q9UK58	QQASKS[+80]PYNGVR	707.827	138342784	141207568	142548336	123164824	129377984	116039608	35774980	41173404	31280016
Q9UK58	S[+80]PYNGVR	436.687		22207316	19675702	22578040	21068988	20881558	25402130	25952206	24055294
Q9UK58	HHNHGS[+80]PHLK	622.278			2665447	2820730	1714929	1913045	702588	731835	492979
Q9UQ80	ALLQSSAS[+80]R	506.745	37902736	45268804	42611912	24413254	29821452	28967114	14051363	16251745	11548058
Q9UQ80	TAENATS[+80]GETLEENEAGD	959.365	85781344
Q9UQ80	TAENATSGET[+80]LEENEAGD	959.365	8487130							106681136
Q6UN15	AEFTS[+80]PPSLFK	652.302	4129573	9909148	5769909			1820753	895987		2082650
Q6UN15	AES[+80]PDLR	434.184	124387368	83591744	129425240	119065632	112041952	120841144
Q6UN15	ERDHS[+80]PTPSVFNSDEER	1041.43	37921476	539277312	698218624	398103168					139629136
Q6UN15	ERDHS[+80]PTPSVFNS[+80]DEER	1081.41	21045992	22734012		13757763	17685132	16509153	7076755	8630528	7731750
Q6UN15	DHS[+80]PTPSVFNSDEER	898.86	308933952	274589408	320517248	276603488	271554976	261395952	103293080	158891824	132937784
Q6UN15	DHS[+80]PT[+80]PSVFNSDEER	938.843	240736928	213341328	218770048	210302672	194718256	178323008	78688240	96301152	85877448
Q6UN15	DHS[+80]PTPSVFNS[+80]DEER	938.843	108316568	175996416	109412552	160760288	159197680	86891608	50504440	47857332	46981600
Q6UN15	DHS[+80]PT[+80]PSVFNS[+80]DEER	978.826	9506791		61994012	30639240	50973712			21179774	846124
Q60FE6	AFGPGLQGGS[+80]AGSPAR	755.346	175352400	173472544	216769584	168200688	173834704	161000496	72458600	75063816	77551232
Q60FE6	AFGPGLQGGSAGS[+80]PAR	755.346	177982752	181513824	189779744	153914848	174758400	149662496	72492384	89777816	80200056
Q60FE6	CSGPGLS[+80]PGMVR	649.275	876990144	836060096	958018368	900654656	694538240	669707968	535245824	614430848	586373760
Q60FE6	RAPS[+80]VANVGSHCDLSLK	945.948	3303369	1997768	609135	10904730	13027577			8645296	10956953
J3KMX2	AEGDSAGTAGT[+80]PGGTPAGDK	898.87	6087653	571860	961677	10113851	12745852	9613281
Q9NYF8	SKSRS[+80]QS[+80]S[+80]SR	675.236	1474983296	1062812416	1445905408	1423832576	1255574528	1230397440	699144576	835781824	742103104
Q9NYF8	KAEGEPQEES[+80]PLK	761.345	1033719168	1036733760	1422498304	1575738752	1610029184	1375901440	953034752	1177829504	951317696
Q9NYF8	KAEGEPQEES[+80]PLKSK	868.909	250560528	292577824	393447936	312760160	382871008	336696576	52052108	67836816	57761652
Q9NYF8	AEGEPQEES[+80]PLK	697.298		68335384	58256084	49063948	55718180	52012484	61257340	79687760	53357476
Q9NYF8	AEGEPQEES[+80]PLKSK	804.861	11041691	13256470	76390784	65106696	105933856		8670886	8387879
Q9NYF8	SSATSGDIWPGLSAYDNS[+80]PR	1080.97	74278648		71572936				76185192	87507192	82047608
Q9NYF8	NTPSQHSHSIQHS[+80]PER	961.419	196991648	119494424	215975456		132276776	110219584		42860500	28590308
Q9NYF8	NTPS[+80]QHSHS[+80]IQHSPER	1001.4	29117324		28125988		22509446	22888668	9939867	7428658	16553384
Q9NYF8	NTPS[+80]QHSHSIQHS[+80]PER	1001.4	28929778	37014748	31984818			16110427	10665518	6478127	10885340
Q9NYF8	SGS[+80]GSVGNGSSR	566.225			768713	1552555	3373145	4066441	1487637	3661834	1626003
Q9NYF8	YS[+80]PSQNSPIHHIPSR	900.415	35241932			57149000		45565924
Q9NYF8	Y[+80]SPSQNS[+80]PIHHIPSR	940.398	932908288	1015941504	1232112896	766290048	1012056832	706137600	359368896	515618656	474700800
Q9NYF8	AEGEWEDQEALDYFS[+80]DK	1056.41		5559838		1738860				4617450
Q9NYF8	FNDS[+80]EGDDTEETEDYR	1001.35				702764			1751690		2899100
Q9NYF8	FNDS[+80]EGDDT[+80]EETEDYR	1041.33					157900880
Q9NYF8	GNRES[+80]DGFREEK	752.315	13015517		11859514				4573844	6840886	5113079
Q9NYF8	KETQS[+80]PEQVK	627.292	1124904064	1226830592	659370560	1055028224	980614272	899810048	699045952	990465280	638641408
Q9NYF8	KETQS[+80]PEQVKSEK	799.377	8930310	37153884	64913708	60047632	55847324	56248720	445417	761812	538623
Q9NYF8	ETQS[+80]PEQVK	563.245	906888896	890858944	1171466240	1324144384	1058782464	1024976064	561485504	922003648	709209152
Q9NYF8	ET[+80]QSPEQVKSEK	735.33	349669408	353941344	362233280	223729280	234552256	211184176	7244090	11191506
Q9NYF8	ETQS[+80]PEQVKSEK	735.33	319717152	361118816	311937088	209522272	239844608	186349968	5684149	7904091	3468254
Q9NYF8	ETQS[+80]PEQVKS[+80]EK	775.313
Q9NYF8	LKDLFDYS[+80]PPLHK	826.908		28238282		8391823			10361513	4139356
Q9NYF8	DLFDYS[+80]PPLHK	706.318	98754528	41020400	87127568	144026576	115843968	116818856	90068760	43065496	63691752
Q9NYF8	STFREES[+80]PLR	651.298	948346560	891194560	946806592	1017182336	1041294208	895076544	253201840	396616128	290464512
Q9NYF8	QKS[+80]PEIHR	537.758	701872832	801203392	710306560	657318272	664565632	648915968	282501920	437661408	297526112
Q9NYF8	RIDIS[+80]PSTLR	619.319	568252672	513189632	583049728	664131456	630728960	633173824	241849648	321854912	280311584
Q9NYF8	IDIS[+80]PSTLR	541.268	776394432	719175104	823651456	887459648	727383424	763948864	556668416	681189248	541673664
Q9NYF8	IDIS[+80]PSTLRK	605.316	30919906	39517004	38140772	16060281	19760544	25767566
Q9NYF8	IDISPST[+80]LRK	605.316	29072310	27719240	30672668	25341432	18596314	24190868
Q9NYF8	LRCDS[+80]ADLR	593.258	74941584	85803208	86468792	148094240	158848944	143032032	38959836	39933944	37484452
Q9NYF8	CDS[+80]ADLR	458.665			93472376	169009440	166402688	137203392	55902548	80666464	65953940
Q9NYF8	SSSSSASPS[+80]SPSSR	695.778		102437656	90120488	57332052	41306172	49328384			27390340
Q9NYF8	SSSSSASPSS[+80]PSSREEK	888.868	9370994	11188204	3822376
Q9NYF8	EEEWDPEYT[+80]PK	751.79	33188038	27907372	38727008				6062878	7293888	6247183
F8VWH9	EWSLESSPAQNWT[+80]PPQPR	1095.49
F8VWH9	KS[+80]PSSDSWTCADTSTER	997.894	463787		46304128	8062516				8360196
F8VWH9	S[+80]PSSDSWTCADTSTER	933.846	35188824	35566248	34448168	47908204	49810080	38199368	38343720	50632584	39169756
A8K8B2	QEESES[+80]PVERPLK	804.369	5012133	10018035	7281371	5244848	4609368		12027931	22962704	9546587
A8K8B2	QEES[+80]ES[+80]PVERPLK	844.352	4004201		16239424	21451402	5713257	17145656	29258366	38947864	32472508
B4DF30	ESS[+80]PFLSPLEASR	750.343				15841398	5849896				4486027
B4DF30	T[+80]LMMEQR	494.703	22314554	16276849	18053212	15742954	19706782	13633360	15709606	28253100	23054564
B4DF30	LESLYS[+80]DEEDESAVGADK	1018.91	89014216	89793832	110191296	96282552	106564064	91564112	59384016	62117452	52574076
H0UIA1	ARS[+80]WSPPPEVS[+80]R	764.821		59661876	119211960	34954616	15886759	10065944		15814648
H0UIA1	SWS[+80]PPPEVSR	611.269	583962816	563182144	1175936768	781352256	1397560832	873468224	329581088	460101952
H0UIA1	AELGMGDSTSQS[+80]PPIK	849.376	7411668		27399966	15367248	33695332
H0UIA1	AELGMGDSTSQS[+80]PPIKR	927.427		187869936		33902424				68110448	64240464
Q14542	AELLQSDENGIPSS[+80]PQK	946.936	21721992	22892208	31949852	62192408	67807488	70322288	31179878	34902016	34170640
Q14247	HCS[+80]QVDSVR	584.234	5248983			22122438	21983864	20211674
Q14247	HAS[+80]QKDYSSGFGGK	774.828		8373015		6622751
Q14247	AKTQT[+80]PPVSPAPQPTEER	1007.49		34074688	27004092	14749906	12426054
Q14247	AKT[+80]QTPPVS[+80]PAPQPTEER	1047.47	505073248	548393600	595686784	719465088	835960128	792651776	184634128	273959520	252681952
Q14247	TQT[+80]PPVSPAPQPTEER	907.92	249666384	249448144	343243680	235856320	258986208	221579536	178109584	281598912	211018304
Q14247	TQTPPVS[+80]PAPQPTEER	907.92	37563992	20049382	349040960				12077563
Q14247	T[+80]QTPPVS[+80]PAPQPTEER	947.903	1356124800	1767032704	2241303040	2254061312	2230500352	2350030080	2191745280	3491073024	2651804672
Q14247	TQT[+80]PPVS[+80]PAPQPTEER	947.903	1358254208	1741298048	2240578304	2594564096	2221428736	2347910912	2191800320	3523393280	2682206720
Q14247	LPS[+80]SPVYEDAASFK	795.858	611601088	735882944	719390080	1262337408	1267072896	1516311296	1316161536	968873472	744130368
Q14247	LPSS[+80]PVYEDAASFK	795.858	647032128	732024192	725841984	1330513280	1650088064	1549013632	1271738624	1007441920	944918272
P51532	KIPDPDS[+80]DDVSEVDAR	919.396		26887754						18140528
P51532	KRDS[+80]DAGS[+80]STPTTSTR	913.87	9243211	9646671	8284098	12571125	8701703	14900542		4850459	4060419
P51532	DSDAGSS[+80]TPTTSTR	731.788	39371696	49567804	51638956	29309878	29991278	28491322	6343842	14838917	11408994
Q5STU3	GSYVS[+80]IHSSGFR	688.803	61145		6114421		7340379	6964075	2200382		3516212
Q5STU3	NKS[+80]LNLK	448.734	14215509			16777994	16085672		7413568	10652927	8781093
Q8WU90	FSTYTS[+80]DKDENK	757.806	57189468	56289668					37118828		28429428
Q8WU90	AENGERS[+80]DLEEDNER	921.861	101446456	72636216	98426216	105955968	88906896	96808608	110961960	141860704	126975536
B7Z2K7	AYS[+80]FCGTVEYMAPEVVNR	1086.96	494644896	293376160	401244000	582394560	538938432	483954080	313959136	152603200	213233936
B7Z2K7	GFS[+80]FVATGLMEDDGKPR	953.924	41655208			72089624	92864544	66462080	33215290	22275782	26863980
Q05CR1	NEEPVRS[+80]PER	646.785				92123384			99658840	145930096
Q05CR1	KHS[+80]PS[+80]PPPPTPTESR	887.882	273431488		433095968	275524544	526473152	89162936	197462048	138180816	158830816
Q05CR1	KHS[+80]PSPPPPT[+80]PTESR	887.882	294176256		425780224	251282944		80337848	154354528	152496912
Q05CR1	KHS[+80]PSPPPPTPTES[+80]R	887.882	290266400	500880992	428421984			86547736	157136080	148567728
Q05CR1	S[+80]QKEEDEQEDLTK	829.843	8948486	7252471	9470851						30267320
Q05CR1	S[+80]PQVPAAQQMLNFPEK	932.937			10189390		3978035			7155203	7550376
P22314	NGS[+80]EADIDEGLYSR	803.325	141060288	135047616	148420576	234940336	202249488	216575728	101670472	130076152	119805608
B9EG73	ALS[+80]KPGTAAELR	647.332	10033678	10288974	10161332	11218570	12685789	11542526	4350840	8127557	5617714
B9EG73	AEPYVAS[+80]EYK	618.763	12437911		13635326	13721089	14579659	11306961	8475800	10434260	7622463
Q5STZ8	LSVPTS[+80]DEEDEVPAPKPR	1023.47	472553696	399981568	475873408	215043376	204213456	193094352	67690648	93539112	92801504
H7C1N2	KSS[+80]LGNDETDKEK	765.838	55801012	60499184	36907544	74989008	78507104	71186880	22944974	37892708	28181584
H7C1N2	AEQLVLSGADS[+80]DEDTSR	936.897	28686348	33219854	30412742		23740226	20770366	7794944	11994059	23805290
H7C1N2	VSLGS[+80]QIDLQK	634.318	13220889	13394055	14143337	9448225	10151480	9674143	2932571	3118671	3038114
H7C1N2	GQNPGKS[+80]YR	543.74
H7C1N2	LQADPKPIS[+80]PQQK	765.39			64895824	72116608	85023784	37411588			44364256
E9PNJ4	AEQS[+80]LHDLQER	703.309	33058684	30781552	31382756	28848610	24309196	23097876			6544283
Q9Y343	AESCGS[+80]FDETESEESSK	979.846	3406506		4119262				157685		5335257
O75691	SLSDNGQPGT[+80]PDPADSGGTSAK	1069.95	143315488	200715968	148655456	88496112	91753928	101485184	62622740	71502864	71756776
O75691	AES[+80]DGEEKEEVK	715.29		1304061			183162		4793899	1175733	937053
B4DH02	AFS[+80]DPFVEAEK	660.281				2341783	2407156	3582986		899456
B4DH02	AES[+80]EEMETSQAGSK	782.298	2499027						5548949	5867532	4944568
A8K5D9	QPLSEASNQQPLS[+80]GGEEK	989.941	72188752	68047696	73105200			35341784	43621496	56409712	46491216
A8K5D9	SCTKPS[+80]PSK	536.231		62514252		83629808		78422480	36190896
Q4LE79	AES[+80]GPDLR	462.695	173158944	175932304	172514432	154967552	154599248	155390000	43680376	59778176	52806844
Q4LE79	GVITDQNS[+80]DGYCQTGTMSR	1085.43		10432844	2634467		4998123				3097472
Q4LE79	GGGGYTCQS[+80]GSGWDEFTK	987.372				243886896			209759040	204964304	230439872
Q4LE79	GAGSIAGASAS[+80]PK	577.266	10871777					24418230
Q4LE79	S[+80]MSFQGIR	503.215	688342144	568113344	787130496	666489984	717503744	681475904	259278864	310946464	270492096
Q4LE79	SMS[+80]FQGIR	503.215	689723392	584033088	792215040	682642432	735007296	679692288	258444912	310615584	273807200
Q4LE79	KTGS[+80]QY[+80]DIQDAIDK	871.358	187515184	217586592	256258224	262574752	4098877	235977920	214799696	271764800	283559552
Q4LE79	GLPS[+80]PYNMSSAPGSR	800.845			309601312		57483108
Q4LE79	GLPSPYNMSSAPGS[+80]R	800.845	226571808	294852160	316835040	318665792	302796480	307947968	140870832	156557104	137899456
Q4LE79	GLPSPYNMSS[+80]APGS[+80]R	840.828	1265991552	1146908544	1274469248		786133184	713339648	292363360	285689056	288127296
Q4LE79	GLPS[+80]PY[+80]NMSSAPGS[+80]R	880.811								51783496
A8K0G7	EEAGETS[+80]PADESGAPK	827.828				10253714		5315779	6311467	8664980	7973155
Q8WWW0	AES[+80]KESVGSR	565.248	826686		8219619	7817862	7621941
Q8WWW0	T[+80]PS[+80]PESHR	535.689				11896368
Q8WWW0	LSLS[+80]PLR	433.231	27247036	31140986	29685110	39020892	36972216	31536228	18206892	22140884	18521176
Q8WWW0	KAVPMAPAPAS[+80]PGSSNDSSAR	1039.47		6731702	12770698	15709865		13066966	646080
Q8WWW0	AVPMAPAPAS[+80]PGSSNDSSAR	975.425	305382912	280450336	365596000	301158208	336202464	301399392	198064368	257293328	227055184
Q6ZV73	KAAS[+80]EELLEK	599.292	17723088	14920352	16373085					9862566
Q6ZV73	GVSSS[+80]FDMPK	567.73		7695040	8840026	6405259	8095326	6716452			3984135
Q6ZV73	AKS[+80]LSAMDVEK	629.791				9809274		10455401		1592753	4460309
Q6ZV73	AYS[+80]TENYSLESQK	800.332	17243216	22203054		10386679	18100072	19380680	6813826	9590998	9989158
Q6ZV73	AES[+80]LDDQMLSR	672.779	23167284	19995592	26124564	22754570	22169746	20549898	11468524	14091563	12247609
Q6ZV73	AESLDDQMLS[+80]R	672.779	3650506496		2528033280	3024501504	3138036224	2858016000	1239322752	1968413568
Q6ZV73	S[+80]LDEADSENKEEVSPLGSK	1057.46	20695366	19112024	27077492		14414616		9340666	14081570	12093123
Q9NTI5	METVSNASSSSNPSS[+80]PGR	937.883	155818928	151394560	185718848	124725272	125285328	96532584	72676328	71626072	72181640
Q9NTI5	METVSNASSSS[+80]NPS[+80]SPGR	977.866		21594108
Q9NTI5	GHTAS[+80]ESDEQQWPEEK	969.381	303627840	190228048	368892704	276327456	315413728	233454400	101940408	142462512	113359400
Q9NTI5	GHT[+80]AS[+80]ESDEQQWPEEK	1009.36		20108668	1806685	1891352		2053365	231176
Q9NTI5	LKEDILENEDEQNS[+80]PPK	1039.47	77779528	69656160	60257100	46724392	48234680	41561292	24646768	26140760	25545496
Q9NTI5	AES[+80]PESSAIESTQSTPQK	978.925	137419648	168636848	232369136	128044792	114612880	74989656	78580248	127720448	110463352
Q9NTI5	AES[+80]PESSAIESTQST[+80]PQK	1018.91	101461592	30989252	72236288	24701856	42113936	3005697		42014604	40902652
Q9NTI5	GRPS[+80]KTPS[+80]PSQPK	763.842					21162446			9203794
Q9NTI5	TPS[+80]PSQPK	461.208	923890816		1175303296	45801184		29851504
O75592	QVS[+80]TENDSTLVHR	783.351	11083371		11865378	25115484	26043172	22608660
O75592	SLS[+80]PNHNTLQTLK	766.877	61614908	58406748	62618348	61439968	60970200	53754080	16650565	24388334	21708890
O75592	AES[+80]PGPGSR	469.192	24053566		10145796	21414044			267311
O75592	SKS[+80]DSYTLDPDTLR	839.372	96905928	82613104	117176664	123152336	129401336	107954664	47086212	49706416	49327372
O75592	SYS[+80]VVASEYDK	664.276		12588735		15091378	17048396	14537972	10455818	14717334	10922152
O75592	VNS[+80]GDTEVGSSLLR	757.348	37747536	52405716	55272372	61382556	71995224	48059296	52573544	51968784	40791832
Q9BUA3	AES[+80]PSPAPPPGLR	678.321	112837848	134489136	134520400	129868048	121772032	110053104		71257120	56582824
Q9C0D5	GVSMS[+80]LPSS[+80]PLLPR	800.864	18840082	27351426	21884492			7358535	12193085		13354134
Q9C0D5	QIASNSPGS[+80]SPK	626.782	4350470	4278844				2661893
B7Z9D0	SSDITSDLGNVLTST[+80]PNAK	1000.46		3218856
B7Z9D0	MQHLS[+80]EGTK	555.736	32068566	31627820	33253978	31672674	32563304	31262542	15784725	19941736	15879430
P46063	AESS[+80]QTCHSEQGDK	822.304
B2RA91	VETVSQPS[+80]ESPKDTIDK	970.448		6353425	7865670	8003426			8502527	14310815	12707550
B2RA91	VETVSQPSES[+80]PKDTIDK	970.448		5955633	6794312	7824326			8476010		12616059
B2RA91	VET[+80]VSQPS[+80]ESPKDTIDK	1010.43
B2RA91	FHS[+80]PSTTWSPNK	734.816	85764952	86128640	93616744	74060584	66331336		24735724	35984764	31987820
B2RA91	KRPQS[+80]PSPR	566.785			30388658		30361956	27388058	13301325	17664590	15970123
B2RA91	KRPQS[+80]PS[+80]PR	606.768
B2RA91	RPQS[+80]PSPR	502.737
B2RA91	ESRRS[+80]ES[+80]LS[+80]PR	772.289		22673996		127211840	118597152	109661488	20568990		21770622
B2RA91	RS[+80]ESLS[+80]PR	546.218								28705446	98258
B2RA91	RSES[+80]LS[+80]PR	546.218		11454059			8712701	7314630	21802920		24087862
B2RA91	IDRDSYS[+80]PR	594.756	87899024	160483584					1028252672
B2RA91	NSS[+80]GPQSGWMK	629.75	24005734	12703625	40331404		29275390	25190316	10434256	8799892	11399110
P13645	YSS[+80]SKHYSSS[+80]R	724.766	406032	19230816	17450518	13474088	19676740	17216638
P13645	YSSS[+80]KHYSSS[+80]R	724.766	14954822	18971058	17790870	14104948		16778388
P13645	S[+80]GGGGGGGGCGGGGGVSSLR	815.325	5168952320	5045528576	5553892352	5461271552	5761546752	5062802944	2959562752	3454560000	2987701504
P13645	SGGGGGGGGCGGGGGVSS[+80]LR	815.325		124355272	140208384		105664984	52084344	47088920	49451252	43789696
P13645	GS[+80]LGGGFSSGGFSGGSFSR	894.373	352593504	326294432	389827968	491983712	535428960	333433408	170665664	199310832	192330160
P13645	GSLGGGFS[+80]SGGFSGGSFSR	894.373	354052320	328981760	372217152	498885920	542300480	351044896	198713456	200879200	205400704
P13645	GSLGGGFSS[+80]GGFSGGSFSR	894.373		9553101	7703666	5600023			7169264	2772341
P13645	GSLGGGFSSGGFS[+80]GGSFSR	894.373			25659296	10307436		7921966	12219037	7199359	7455452
P13645	GSLGGGFSSGGFSGGS[+80]FSR	894.373	1519577472	1484714240	1329178624	1129138048	1177387392	1158939264	1075181952	895059648	971117376
P13645	GSLGGGFSSGGFSGGSFS[+80]R	894.373				17827338		10806929	5525436
P13645	GS[+80]LGGGFSSGGFSGGS[+80]FSR	934.356	95386136	65264868	79780520	66469404	70574848	70101504	69799264	50284224	71821024
P13645	ALEES[+80]NYELEGK	731.311	3214677	2789210	2717325	2425516				881886	898239
P13645	SLLEGEGS[+80]SGGGGR	671.785	126622456	162795296	166579408	132550248	141844976	126953712	60240604	101248272	87730000
P13645	SSS[+80]SGSVGESSSK	633.248	1406498560	2308272128	1864717312	2943697664	1614107904	1977196800	816218368
P13645	SSSS[+80]GSVGESSSK	633.248	1406498560	2308272128	1864717312	2943697664		1977196800	231419744		363090144
P13645	SSSSGS[+80]VGESSSK	633.248	735507968	308579936	1864717312	2943697664	1614107904	1977196800	231730528
P13645	SS[+80]S[+80]SGSVGESSSK	673.231		28454430	72905544	67735912			13201310	7443941
P13645	SSS[+80]S[+80]GSVGESSSK	673.231	4274366	2631464	1327754		804986	3857082	1866367	4922509
P13645	SSSS[+80]GS[+80]VGESSSK	673.231			100999224	118704280		147025600	18569244	4922509	57185264
P13645	SSSSGSVGES[+80]SSKGPR	788.336			368800	421688	305474	235273		309310	170160
P13645	SSSSGS[+80]VGES[+80]SSKGPR	828.319	48920312	54243004	66116888	64696588	63487512	56938108
P13645	SSSSGSVGES[+80]S[+80]SKGPR	828.319	255371408		51593668	65300216	63707028
A0A075BPH5	AETSEGSGSAPAVPEASAS[+80]PK	1005.44	58401040	59553480	67495784	45868104	57324684	40159100	23974188	56461640	47131820
Q5W0B1	LKAEVDNRS[+80]PQK	732.864	21351148	22155348	21089174	18144358		19703536
Q5W0B1	AEVDNRS[+80]PQK	612.274	11158257		17511826		8522530	24634960	7312806	18755104
Q5W0B1	TSS[+80]EASMDAAYLDK	784.813	23937090		35571468	25839824	39497916	24059256	11884179	13467416	23916250
Q5W0B1	KIQSSLSSAS[+80]PSK	700.345	18245948		19511762			15935577
Q14160	LPLLPPES[+80]PGPLR	733.394	31507098	22875274		38709700	83344032		2158441	9220700	15520540
Q14160	NS[+80]LESISSIDR	650.793	46113840	48018488	49233904	62059656	59237604	46779172	52537372	60182956	51415792
Q14160	NSLES[+80]ISSIDR	650.793	18632512	14903717	15451265		16823994	17567930	17354820	18604494	18682092
Q14160	NS[+80]LES[+80]ISSIDR	690.776				2784334				9176859	6765875
Q14160	RVS[+80]LVGADDLR	640.822		2069465	1686423	464420	2475432	2915065	1074982	7864120	1211575
Q14160	QSPAS[+80]PPPLGGGAPVR	784.385	246034768	289087360	189401920	364993696	379046688	343638240	161860496	147757744	177055952
Q14160	LRVQS[+80]PEPPAPER	778.385			16392032	29718472	24102196	25478414	2536719
Q14160	VQS[+80]PEPPAPER	643.792	57329732	91965136	52422516	155956112	181334288	175238976	89371496	93168312	81036336
Q14160	ALS[+80]PAELR	468.731			13035376	18170728	17924758	17142688		7800097
Q14160	MKS[+80]LEQDALR	635.797	109557208	97681056	109754952	107124344	112656456	98169976	46922556	60922600	55739384
Q14160	LS[+80]PDFAEELR	628.782		896123			1583087			2945892	3075174
P84103	RRS[+80]PPPR	473.243	978392896	715078720	1031701568	696798080	49324116	206413280	140105856	272614016	390209120
P84103	ERS[+80]LS[+80]RER	596.747	23412934656	15691883520	20987127808	20633165824	21222129664	18374735872	7448905728	10087664640	7424009728
A0A087WV66	RVS[+80]RSS[+80]FSSDPDEK	878.851					63230220	56372556		25452152
A0A087WV66	SS[+80]FSSDPDEK	589.716	43421236	47504436	43644004	36742744		34743372	36016108	36211044	31391108
A0A087WV66	MKTPVQYS[+80]QQQNSPQK	986.453	20392386	3740068	25842850	48595108	3117199	20091802
A0A087WV66	MKTPVQYSQQQNS[+80]PQK	986.453	20392386		25805520			3521040	174480	170294	377863
A0A087WV66	TPVQYSQQQNS[+80]PQK	856.886	287183872	284509760	329901696	204557424	183152608	198650816	123037104	104249192	104906336
A0A087WV66	RES[+80]VNLGK	491.74		31964734		27177090	25960920	50419528		14271800	29794578
A0A087WV66	AQSLVISPPAPS[+80]PR	750.385		536581472	467274816	533180480			289566304	269736864	256855968
A0A087WV66	S[+80]GASEANLIVAK	620.303	4640518		4132996	4305853	4729524	3490501		3915344	2653350
A0A087WV66	TS[+80]DTETEPSK	587.729		112258864						13866871	22022474
A0A087WV66	TFKES[+80]PK	458.712		512623	3334335	10005702	8127007
A0A087WV66	IACKS[+80]PPPESVDTPTSTK	997.961	161764848	114533608	121150752	100688072	82633048		33530268	43072988	43060372
A0A087WV66	IPCDS[+80]PQSDPVDTPTSTK	1012.93		17620646	5655473
A0A087WV66	MPCESS[+80]PPESADTPTSTR	1015.4	135130560		209235968						17848070
A0A087WV66	ILCKS[+80]PQSDPADTPTNTK	1026.97	13106337		12515405	6748588		6759253	5327745	8846758	2730111
A0A087WV66	S[+80]PQPDPVGTPTIFKPQSK	1002.5
A0A087WV66	IACKS[+80]PQPDPVDTPASTK	996.461		8939814	18097944	21377598	21362528		8085733	7376361	11872909
A0A087WV66	ITEVSCKS[+80]PQPESFK	908.913
A0A087WV66	TS[+80]GETTQTHTEPTGDSK	928.881	7563173	8693274	7881391				4011149	7165040	3252939
A0A087WV66	TSGET[+80]TQTHTEPTGDSK	928.881	7575930	7477861	8121524		2509494		5733986	6918478	3980996
A0A087WV66	AFKES[+80]PK	443.707			33829568	24103476				43819440	29574888
A0A087WV66	IPCKSS[+80]PELEDTATSSK	965.429	101315400	118366448	199805168	40377408	34714480	32460240	65304000	69920792	42324592
A0A087WV66	S[+80]SPELEDTATSSK	716.298	13902596		27506096	5155369	10595832	11444602	25513050	24174574	16234966
A0A087WV66	GKS[+80]SEPVVIMK	627.812	19155426	20508836	19670476	22637126	23470058	21133034	23450610	37467364	28758316
O60293	RIS[+80]TSDILSEK	664.827	2440985	3453080	2066130	2113894	2044172	1924238
O60293	TSSSS[+80]PANSDVEIDGIGR	936.405	10028863			440807		12091923		3342480
O60293	S[+80]FLESNYFTKPNLK	884.421	13839732	13462776	4680611	12768318	12833573	16655509	14007961	9012010	5389233
Q6NSF2	EES[+80]EESDEDMGFGLFD	958.327	930771		290985	550368
Q6NSF2	EESEES[+80]DEDMGFGLFD	958.327		524147		429220			57614388	38583028
Q6NSF2	EES[+80]EES[+80]DEDMGFGLFD	998.31	340961248	466947328	590122880	486605728	435002912	488827552	439393280	166792544	526404544
H3BPE1	QGS[+80]FSEDVISHK	707.306		56479620	85940744	67723416	65294248	56703068	27000462	40310976	32874540
H3BPE1	S[+80]LLDDWASK	557.744	454644800		896292352	365726016		260186336	328308640	1154071936	668180160
H3BPE1	SMDAMS[+80]SPTK	567.714			209736			7036700	9275549	10813002	8793716
H3BPE1	SMDAMSS[+80]PTKTETVK	846.865	54146668	50434452		51102012	51473780	45249036	11886919
H3BPE1	AFLAELEQNS[+80]PK	713.834	84201632	72663296	86291560	68327992	74160688	61493776	41330468	43649192	35630276
P07900	ERDKEVS[+80]DDEAEEK	879.857	11938536		12415521	10648182	11569654	11566397	8165406	11318950	9748404
P07900	DKEVS[+80]DDEAEEK	737.285	369224736	435352192	398909472	416250784	419991840	368100352	448231008	636209280	484646496
P07900	DKEVS[+80]DDEAEEKEDK	923.367	28514744	33027526	27675328		25225508	28959584	48874064	60389236	50130152
P38432	AFQLEEGEET[+80]EPDCK	931.364	333062688	299410976	358140576	298051712	349141792	341463488	173193296	211898512	169721760
P38432	NS[+80]SEKLPTELSK	706.837	87565800	104147360	99225848	79222480	87994136	77459488	17274790	31122452	22705246
P38432	NTT[+80]ADKLAIK	577.794
P38432	LGFSLT[+80]PSK	515.254	12357304	6765877	14504743	15662457	17561816	15173926	5050944	6342410	6878010
P38432	LIIES[+80]PSNTSSTEPA	813.369	128831360	75949968	94605176	68020840	97409592	98283248	45741608	54399508	33268168
P05787	VTQKS[+80]YK	467.226	52039992	79285144	50000492			20625432			4437792
P05787	SYKVS[+80]TSGPR	581.269	36788840	38723496	42457432	58213872	61757004	57981952	12604080	14267000	11692914
P05787	AFS[+80]SRSYTSGPGSR	770.333	7778016		5172712
P05787	AFS[+80]SRSY[+80]TSGPGSR	810.316	144151872	169915296	233184400	106087024	102261000	96787120		647098
P05787	S[+80]YTSGPGSR	496.198	9325116416	10425709568	9633510400	9075470336	9164450816	8502318592	4727108096	5463315968	4769251328
P05787	SYT[+80]SGPGSR	496.198	9029194752	10257977344	9610257408	9314753536	9265038336	8499254784	4625194496	5487536128	4769534976
P05787	SYTS[+80]GPGSR	496.198	9101997056	10308564992	9659726848	9348722688	9587989504	8543464960	4605679104	5426795520	4752214528
P05787	IS[+80]SSSFSR	475.703	322400448	308376416	340436480	300579808	248593808	258750064	85452376	130118072	104940864
P05787	ISSS[+80]SFSR	475.703	405943296	389053152	339461248	356832448	302340928	289450368	172052448	229261680	106376552
P05787	ISSSS[+80]FSR	475.703	410721152	389466336	425367712	354407616	381113792	304989728	168128864	226457856	193956032
P05787	ISSSSFS[+80]R	475.703	281032928	283473120	299504448	253009344	229265952	218660544	134305744	167757776	145897312
P05787	IS[+80]SSS[+80]FSR	515.686	80743328	58891244	89383328	71735712	68746216	57989428	29346104	49554940	39502724
P05787	VGS[+80]SNFR	423.679	450629152	527249920	487871840	394528320	415673312	409199168	197309648	234860832	211506064
P05787	EQIKT[+80]LNNK	584.292	2906043		3012524
P05787	FAS[+80]FIDK	454.202	1061002	2152330	1341792		2365210	1858843		689154	620118
P05787	S[+80]LDMDSIIAEVK	700.823	60868820		42309660	78523760	72857864	30917896	40780136		22158808
P05787	SLDMDS[+80]IIAEVK	700.823	132914376	94196768	101082000	164400976		110393840	56323604	39303344	57459024
P05787	AQYEDIANRS[+80]R	701.809	13005765			10837685		11821779
P05787	S[+80]RAEAESMYQIK	746.829	34126148	26382956	31460734	26752926	23586138	8219630		35471572
P05787	SRAEAES[+80]MYQIK	746.829	34974236	27400578	32025342	26050870	23704250	24398632	16225236	35337724
P05787	LESGMQNMS[+80]IHTK	778.336	205195312	165762064	209758320	182382528	200323088	165660400	44580516	53630096	48990856
P05787	LVS[+80]ESSDVLPK	627.305	97558608	73643360	103827176	243591056	250726640	226586080	86862688	99885352	104471528
P05787	LVSES[+80]SDVLPK	627.305			27791124			53018056	9931285	35919812	21696612
P05787	LVSES[+80]S[+80]DVLPK	667.288			210906496	188990832	241806208		106516080
Q16629	S[+80]RS[+80]GS[+80]IKGSR	637.738	580453248	618163648	523380384	971715520	608109440	490371936	895882	2352235	1800251
Q16629	YFQS[+80]PSR	482.7	63323104	45530228	61263332	55439720	62998308	53799464	47742432	50816428	48782660
Q16629	YFQS[+80]PS[+80]R	522.683				28840424	24313420	19188638	56178776	54166256
Q16629	RSRSPSGS[+80]PR	583.775	9351647	280731744	233024096	244404176	256096624	236632960	87791176	9980044	89990320
Q16629	RSAS[+80]PERMD	564.729	188267120	182601248		56627540	278799552	255134800	98411168	160258048	123307144
Q16629	RS[+80]AS[+80]PERMD	604.712	486561472	580351552	494464352	437575712	438208992	414106272	283800512	350960992	286055328
Q16629	SAS[+80]PERMD	486.678	41714168				52048380	48419876			10729185
Q16629	S[+80]AS[+80]PERMD	526.661	311368832	457142112	338133376	307531904	366082176	282758528	267396272	369335424	234997104
Q07021	EVSFQS[+80]TGESEWK	797.327	7400769	11330496		13616458	14471410	10166679	10266147		12276297
Q8N9T8	YVDEENS[+80]DGETSNHR	916.342	411366976	417522304	410754976	380855392	371095360	336601920	153585744	213298320	166229584
Q8N9T8	YVDEENS[+80]DGETS[+80]NHR	956.325	19726716	21430346	21694108						1488369
B3KT06	TIGGGDDS[+80]FNTFFSETGAGK	1044.43	223804432	206021168	239895600	213334848	255023184	192151248	121085080	92213304	117681456
B3KT06	S[+80]IQFVDWCPTGFK	832.863	38694708	26059142	33818016	42324932	32380056	30799728	18100128	11298835	15860242
O95365	AGAAAGDS[+80]DEESR	658.244	53454208	67156248	35396088	51831388	25671784	48261964	33592468	92084640
O95365	AGAAAGDS[+80]DEESRADDK	872.837	39279700	42295840	42970624	37084748	43368104	35499896	22754788	34640640	24260008
E7EPJ7	GAANASGSS[+80]PDAPAK	690.793	14197425	15518383
E7EPJ7	AGAAS[+80]PLNSPLSSAVPSLGK	952.48	14572607	1694682	15361403					333067
E7EPJ7	AGAAS[+80]PLNS[+80]PLSSAVPSLGK	992.463	69192936	41599192		59281376	46215048			35927324
Q86VM9	GPSQEEEDNHS[+80]DEEDR	976.843								8912502
Q86VM9	GPTSS[+80]PCEEEGDEGEEDR	1030.36	39190368	41414604	51442772	42217236	30094280	47914616	46048680	34297560	31155716
Q86VM9	GPTS[+80]S[+80]PCEEEGDEGEEDR	1070.34						5574873		7078408
Q86VM9	TSDLRDEASS[+80]VTR	758.836		42934684		43330096	42875208	42590428	24762354	32317722	25505588
Q86VM9	S[+80]PQPPSR	424.687		82280104	87570280	353419968		210159040
Q86VM9	KLGVS[+80]VSPSR	555.289	19869666	22438762		21542284	18954068	19401726		8699007
Q86VM9	KLGVSVS[+80]PSR	555.289	19473558	20087398		21541142	18144340	19818044		8539538
Q86VM9	LGVSVS[+80]PSR	491.242	399384672	414972480	595872832	484153440	538232896	456727936	199984320	343930144	280528064
Q86VM9	LGVS[+80]VS[+80]PSR	531.225	92795176	115782928	142245728	85057336	127017464	107621272	51111816	77061376	66990132
Q86VM9	YEPSDKDRQS[+80]PPPAK	897.907	61171844	21001396	12250687	42002280	25770764	35299528	32933706	35240492	23279330
Q86VM9	RPNTS[+80]PDR	511.724	1254751488	989985536	1115686784	1082478592	1148024192	1083673856	605141376	843782208	610001024
Q86VM9	LGS[+80]PKPER	482.237	438966208	501550240	493230240	666394560	633860352	574843776	240986752	356498624	285820896
Q86VM9	QLS[+80]PQSK	434.202	472439584		687906496	534324256	478668320	554621312		428611872	332479360
Q9NWH9	DGQDAIAQS[+80]PEK	669.782	222045392	164033248	226294832	206588448	197263760	203922128	227411952	299284320	273034400
Q9NWH9	DGQDAIAQS[+80]PEKESK	841.867	945791744	1174747648	1243376768	1146427264	1057225792	1058987456	339743104	421963136	374936320
Q9NWH9	ISSKS[+80]PGHMVILDQTK	910.952		28310612		26001174		24460966	3634567	2825821
Q9NWH9	IS[+80]SKS[+80]PGHMVILDQTK	950.936		124259456	183979856	140833728	136827856	129918280	62474268		62316892
Q9NWH9	ISS[+80]KS[+80]PGHMVILDQTK	950.936		122743016	181743456	110152616	138734192	129759632	61574956	74282744	71177784
Q9NWH9	S[+80]PGHMVILDQTK	703.331	445349504	431307008	495602752	468264384	490881056	393598112	223200096	290518176	263240048
Q9NWH9	ERAS[+80]LDK	449.705	96220896	108473088	94058664	109940840	106870600	105409648	71471064	114378064	82569408
Q9NWH9	SEGS[+80]MSTDKR	589.231		4894577	4805122
Q9NWH9	EVS[+80]GHSVR	475.708
Q9NWH9	AGAGMITQHSSNAS[+80]PINR	946.428	123345624	120842304	123398728	22040440	143308128	95312976		1837310
Q9NWH9	IVQISGNS[+80]MPR	641.305	9998071		18025072	14199900	14740696	16024958	12015472	12000446	14735585
K7ENH8	AGAPGALS[+80]PSYDGGLHGLQSK	1031.98	21511284	15979104		49340500	45968932	42062056
K7ENH8	TSS[+80]TDEVLSLEEK	759.335	77809648	57681888	64227620	74765864	68002728	57425540	40646508	41652208	35764980
Q9H9J4	DSALAEAPEGLS[+80]PAPPAR	914.927	273361344	230963776	250233392	255294384	240155104	238436912	98567416	121269184	110198304
Q9H9J4	RHDS[+80]VENSDSHVEK	859.86		2522104	21685814	5911771	7287313	6846007	1803569
Q9H9J4	HDS[+80]VENSDSHVEK	781.81		3584373	2515168		4462408	11585103			2344656
Q9H9J4	S[+80]EQKDPLEEPK	690.308
Q6ZRS2	AGAPVGGS[+80]PGLAK	581.287	17118038	13279997	9164291	17818122	9372043	8959889	4432108	8939224	8699725
D3DPS3	RSS[+80]QPSPTAVPASDSPPTK	995.468	12374694	11748604		17111050		9636668	6985773	15454063	10932566
D3DPS3	LSASTASELS[+80]PK	635.8	18566032	16743878	16230033	13563286	14901230	15281935		9990695
D3DPS3	EANANGSS[+80]PEPVK	690.296	22905542	27309874	26712156	18468994	21904604	18649726	11344759	13753066	12661983
Q9ULR3	AGAVTSTPNRNSS[+80]K	735.341		2024909	2655743					5893017	2862563
Q6PL18	DAQNSSDSS[+80]FEK	697.759									2785949
Q6PL18	YSGVNQS[+80]MLFDK	734.813	1026095						641943		581313
Q6PL18	LSSAGPRS[+80]PYCK	701.813		81982
Q6PL18	LS[+80]SAGPRS[+80]PYCK	741.796	94476008	140532016	50289732	257437408	272506336	284912512	84854384	107054376	91343384
Q6PL18	LSS[+80]AGPRS[+80]PYCK	741.796	143681584	136468144	187179584	260618016	255029936	236874112	88832088	85386624	76059336
Q6PL18	TPST[+80]PVACSTPAQLK	819.384	18738316	12681589		49537332	29162982	30343066	19290762	29663024	17225054
Q6PL18	DDS[+80]QNAIDHK	611.74		3435801	4172345	8810737				10758894
Q6PL18	QQNAS[+80]ESKLELR	741.851		16496321		19272980	20920458	23803512	21298436	35071452	19791612
A8K8G0	S[+80]CVEEPEPEPEAAEGDGDK	1062.9					28605792	7071336	24657862
A8K8G0	KGNAEGS[+80]S[+80]DEEGK	734.255	3039356		581436			2665347			5980141
A8K8G0	RAGDLLEDS[+80]PK	640.798	221356656	263864080	220841120	312634880	314735616	299281248	237209664	374149792	287116736
A8K8G0	RAGDLLEDS[+80]PKRPK	831.422	115691800	123587472	111137616	152560560	144820688	171519952	45269856	41097004
A8K8G0	AGDLLEDS[+80]PK	562.747	396475808	382268992	445601120	416858208	376951104	443326304	448129216	721586624	470460864
A8K8G0	AGDLLEDS[+80]PKRPK	753.372	1715448320	1370097152	1525583104	1415760000	1535516288	1663675904	390126592	698503936	558169920
A8K8G0	NST[+80]PSEPGSGR	584.735	364545888	354936128	368566400	412004512	412508480	390411936	160718784	216152144	169186512
A8K8G0	NSTPS[+80]EPGSGR	584.735	178625040	179274592	206262160	178577056	188888656	183169040	99862592	136893824	112398472
A0A075B7E2	AGDPAT[+80]TAAPR	554.245	16692352
J3QK86	QPS[+80]SPSHNTNLR	709.315	59072844		81417656	36016404	34189208	35739904		24535172	16085563
J3QK86	QPSS[+80]PSHNTNLR	709.315	61547684	54498492	80835512	35458812	32067124	34731220	20330936	24045806	17934520
J3QK86	AGDPGEMPQS[+80]PTGLGQPK	923.906	56147612			50097356		52608768	43629516	54396656	51353884
Q9NY61	AGDRNS[+80]EDDGVVMTFSSVK	1047.45	43460376	38979924	37604168	55948436	52273356	47626036	70695496	71460864	69885280
Q9BZX2	RQAS[+80]ESSSRPH	661.286					9052936
Q9BZX2	QAS[+80]ESSSRPH	583.235	827740864	337354080	580013184	978283968	266067984	508547136	132049464	400002016
Q9BZX2	QASESS[+80]SRPH	583.235	691388480	667572480		979369600	231272896	478712736	131532608	429556384	401775584
A0A087WU18	AGDTS[+80]DQEGHSLEEK	841.831	25389652	26687958	23673392	21576878			8397819	13016442
A0A087WU18	STS[+80]PVTDPSIPIR	725.353	30443644	26604810	30652716	26560082	23471906	25907784	12873388	16047883	14332208
P16989	AGEAPTENPAPPTQQSS[+80]AE	981.41	13757843		98639056	9749977		116353088
Q9UKS6	DLHQGIEAAS[+80]DEEDLR	939.399	21820808	28600792	32381490	34312692	40101348	45210692	23516514	25063926	23267534
Q9UKS6	S[+80]PDEVTLTSIVPTR	797.89	974613	4737365		3904283					4386111
Q9H3Q1	QLVSSS[+80]VHSK	576.276	207670080	186048688	216165616	208263248	200591152	194677760	86918440	100040784	82235416
Q9H3Q1	AGEPDGES[+80]LDEQPSSSSSK	993.894	224139008	226248144	176494672	187594784	192724768	169571392	99387168	134414576	105294488
Q9H3Q1	DMLGS[+80]LR	436.191	35405068	30550752	41345440	34460992	43296700	41312300	21143352	26951120	22987610
Q9H3Q1	NAMS[+80]LPQLNEK	662.802	46252804	51654660	55954952	37925084	38097140	36685468	22199810
Q9H3Q1	SLSSS[+80]PVKK	506.757	32337872	38827272	38783492	42576084	39788760	37903288	12829094	20290416	13941209
Q9H3Q1	S[+80]LSSS[+80]PVKK	546.741	170131152	189572240	184464016	111782344	120202624	113584592	67111096	93100768	77775504
Q9H3Q1	S[+80]MGSHTTR	478.686		24657286						8224457
Q08J23	ESTQLS[+80]PADLTEGKPTDPSK	1091	131374024	80204264	133438648	111390976	127650984	130075608	107237208	138675840	127072944
P13639	AGETRFT[+80]DTR	617.267	2299720960	2371162880	2349942784	2119576320	2142139136	2040553344	120170544	146507488	131009760
P13639	IMGPNYT[+80]PGK	579.257	10943637	1825043	13916576	9737219		13910807	6060581	8044504	8892661
P13639	IMGPNYT[+80]PGKK	643.304		52449740	51637240	63784852	68637616	66527828	17334872	34646536	26088138
A0A087WWJ1	QSTLYSFFPKS[+80]PALSDANK	1091.02
A0A087WWJ1	VHVQFFDDS[+80]PTR	764.335	191891936	145467472	195822464	194191424	184310320	185273920	72700240	109483400	69427904
A0A087WWJ1	SEEDNEIES[+80]EEEVQPK	985.891	126411040	87322304	131120160	121524296	129823624	125986376	145703216	204550192	175775296
A0A087WWJ1	MVTGNGS[+80]LK	493.722	20166102	21178418	22376094	20588994	22056986	17109378	18519784	19245198	19915164
A0A087WWJ1	MVTGNGS[+80]LKR	571.773	15605544	18146480		21387146	21839652	20543542	15058979	19498774	14579541
A0A087WWJ1	IHNVGS[+80]PLK	522.766	19658862	21871228	22850086	21738856	24553338	20565602	8501372	12719283	12713546
A0A087WWJ1	AGFDS[+80]DYDQALADIR	868.862			4935050	7952697	6931562	5029839	6068791	3207963
Q96EB6	S[+80]PGEPGGAAPER	602.753	97380816	106664456	155715792	145377888	137765152	135296880	95751208	159932128	144702464
B2RCD8	S[+80]PGPPALK	423.71	59590860	60135640	67695720	54786144	39883796	49922584	17716806	23146298
B2RCD8	RKAS[+80]PEPEGEAAGK	753.851			20167456	35697136	36006940	35642676		9703559
B2RCD8	KAS[+80]PEPEGEAAGK	675.8	319259680	330633632	339180704	422190240	423084224	379354176	168136416	241389760	153903376
B2RCD8	AGGAS[+80]PAASSTAQPPTQHR	936.423	123221824	100952744	100303360	93003336	78828704	78123912	38817284	41716652	36065316
E3W994	SSSSS[+80]QESLNRPFSSK	904.397			27204354					27261006
E3W994	SRS[+80]DIDVNAAAGAK	727.835	45421536	41205052	47852532						1734337
E3W994	MVSQS[+80]QPGSR	578.744		4805415	28071004				6739219	16043689
E3W994	MVSQS[+80]QPGS[+80]R	618.728			105663400		105160120		869630	68678416	65106688
E3W994	S[+80]QEDMNEPLKR	713.805		11221769	11476423	10192885	11935569	10200604	9067674	12242701	9477628
Q6IQ22	AGGGGGLGAGS[+80]PALSGGQGR	832.381	6223449	10391621			11370552	3220853		23452344
A9UEZ6	SSS[+80]FREMDGQPER	803.322	26015148		33777868	35082560	32159866	33928920	1504159	4910901	4065181
A9UEZ6	SCS[+80]ASCVPHGAK	670.76	66301236	67345168	64574180	71601872	65459684	67221920	25095178	34073332	28767688
Q03252	AGGPAT[+80]PLSPTR	602.79		3215005	4937889					5633114	4720902
Q03252	AGGPATPLS[+80]PTR	602.79
Q03252	AGGPAT[+80]PLS[+80]PTR	642.773	48403028	49413700	45788416	40772532	42809012	40904524	15936235	23410732	15127356
Q03252	LKLS[+80]PSPSSR	576.295	268119632	267120160	285178816	325023392	327935104	317902208	105696808	159459904	122018024
Q03252	LKLS[+80]PS[+80]PSSR	616.278	1002126016	767281280	756656896	673878080	659042368	760327616	258305664	554302208	284450464
Q03252	LKLS[+80]PSPSS[+80]R	616.278	749397824	774518848	745808768	670233984	880944960	760076032	245813888	552383744	347618720
Q03252	LSPS[+80]PSSR	455.705	390162432	414868768	427731168	432724448	332044064	322392064	202945440	300407520	214352720
Q03252	ATSS[+80]SSGSLSATGR	674.791	21651088	37038628	27627944	28619778	37200896	34495448	23292576	31741238	31127188
Q03252	ATSSSSGS[+80]LSATGR	674.791	28883	13964037					42748		68391
E7EVA0	DMES[+80]PTK	444.164		10979214	9736742			23127180	18671704		23107932
E7EVA0	DMES[+80]PTKLDVTLAK	814.386	1370493312	1877793536	1904878592	2411032832	2191589376	2026290688	1018711040	956731328	836633728
E7EVA0	ETERAS[+80]PIK	555.763	156080416	157502640	160003744	225049360	225770912	193140560	128501544	194523632	149984864
E7EVA0	ETERAS[+80]PIKMDLAPSK	926.947	2604410		77120912			72777288
E7EVA0	AS[+80]PIKMDLAPSK	669.33	63976308	61657948	70744936	65312356	68069808	59717924	17285432	23816590	20183684
E7EVA0	KETERAS[+80]PIK	619.811						16464570		11218618
E7EVA0	DMS[+80]PLSETEMALGK	794.835	69446368	58919324	72827800	112800400	108353840	105898424	69420720	35581492	54818388
E7EVA0	DMS[+80]PLS[+80]ETEMALGK	834.819	34054984			22096838		22979544		19488542	23293618
E7EVA0	DVT[+80]PPPETEVVLIK	808.913	22560312	34324800	32415872	62072976	63662656	54345400	52748472	30403406	53144712
E7EVA0	DGVLTLANNVT[+80]PAK	746.874		250297					6984606	6742878	5028482
E7EVA0	KCS[+80]LPAEEDSVLEK	842.879	115154896	122240112	147322992	140420544	142081760	121310592	76834280	91957648	85985304
E7EVA0	VPPELLGGS[+80]PPWK	728.865	147909920	52453432	174283328		243711040			11718219	68171568
E7EVA0	S[+80]IHVDSLEPQR	680.816				5599653			5165619	6730483	5036275
E7EVA0	AGGPS[+80]DDDNADKPK	733.793	144542608	87806440		52650936	114895800	109619704	85125736	109748704	48839848
E7EVA0	NS[+80]SPEKHILENK	738.348	119426120	113646184	106149512	124626256	129428840	121674208	23031292	37916832	27272346
E7EVA0	NSS[+80]PEKHILENK	738.348	119423088	82573848	106778648	125905912	125141168	122582432	25918064	38532560	28247716
E7EVA0	T[+80]PSELINK	491.236	28407866	27294996	19882862	42890888	44838448	44851384	33244172	51291484	39269712
E7EVA0	LPT[+80]PTPQVVK	580.31		331401		965516
E7EVA0	KVDLTLLS[+80]PK	597.331	3486280		12099311			25508116	11782259
E7EVA0	VDLTLLS[+80]PK	533.283				2745172
E7EVA0	ELPPS[+80]PEKK	552.77				6871681			22852294
E7EVA0	RAS[+80]PSKPASAPASR	731.862	34237228	51065568	43735224	59600840	61368928	54470936	10516806		11578047
E7EVA0	AS[+80]PSKPASAPASR	653.811	122138528	126161088	161165328	92533224	126547072	110335736	52797224	94674352	67851352
E7EVA0	S[+80]PSTLLPK	461.736	36286784	50079668	54727760		60837784	54527372			15376718
E7EVA0	LATNTS[+80]APDLK	605.789	148149504	190169072	217633952	112997512	108877112	108409224	27696848	52967640	42871660
E7EVA0	SKVGS[+80]TENIK	571.776	42114044	47716660	40370028		33339868	30959750	8420979	12560473	9816256
E7EVA0	VGS[+80]TENIK	464.213	23287882	23405702	22433862	17991090	17802048	17171178	16762736	22433170	19047824
E7EVA0	VGS[+80]LDNVGHLPAGGAVK	835.917	46986084	42989316	51007072	33856332	38520804	35208308	24940446	26617864	24918262
P20700	AGGPTT[+80]PLSPTR	617.795	1730730	1210181	64372184	57994348	51831280	47081488	27845522	37193484	30017426
P20700	AGGPTTPLS[+80]PTR	617.795	71569304	77239576	87476904	100541784	107280040	99234584	43382392	84251792	68461368
P20700	AGGPTT[+80]PLS[+80]PTR	657.778	236799472	181218256	222471520	212895936	222933376	176884672	72970136	118558416	88459304
P20700	CQS[+80]LTEDLEFR	739.305	4348401	7372340	3580898				6097280	7940847	2736366
P20700	CQS[+80]LTEDLEFRK	803.353	1789179		3228911				727652	2708886
P20700	LSSEMNTS[+80]TVNSAR	788.837	26348918		42624992		31584282		11080981	14027186
P20700	VTVS[+80]RASSSR	565.272		9057446	12856159	10675072		13981874	333102	3123283	1999180
P20700	VTVSRAS[+80]SSR	565.272		9242037		10856269	14970242	606961			2025239
P20700	VTVSRASSS[+80]R	565.272	7941560	7544299	12873779	11497634	14815582	11748318	3392866	6198466	1999777
Q92522	AGGSAALS[+80]PSK	513.237	1521299200	1467235712	1306532352	783698944	819969216	799231616	389668800	557436800	452202240
Q92522	AGGSAALS[+80]PSKK	577.284	381959072		394443680	433496704	334897920	320790272	140618496	183846944	165092592
P33316	AGGSPAPGPETPAIS[+80]PSK	850.898		5080090						7253338	4582076
P33316	GSGGFGS[+80]TGKN	524.708				28964096		24156212		864690
F6PQP6	AGGSPAS[+80]YHGSTSPR	756.317			5866494
F6PQP6	AGGS[+80]PAS[+80]YHGSTSPR	796.301	82159264	82120600	80550640	65226380	69189808	63173760	32339454	39634024	35464672
F6PQP6	AGGS[+80]PAS[+80]YHGS[+80]TSPR	836.284			13898512	7245406		13326401
Q15311	TPS[+80]SEEISPTK	628.276		9603872		4471554		39583312	21956758
Q15311	T[+80]PSSEEISPTKFPGLYR	994.972	1648543	13908800				14250686		428064
A8K6Q8	QVDGDNS[+80]HVEMK	719.787	151740128	158399216	159028880	115469416	107315632		46335720	45626544	30556934
Q03164	AGKLS[+80]PLK	447.246	20838164	19556492	23211804	21120100	22158864	20254124	4832311
P14618	LDIDS[+80]PPITAR	639.31	136865632	146677984	164079968	181211824	188810016	171678384	103236392	84492080	79191960
P14618	S[+80]GMNVAR	407.667			10234203
O75369	LDVTILS[+80]PSR	590.802				2358478
O75369	APS[+80]VATVGSICDLNLK	862.918		4365873	3845884	59636368	101477840	42413600		60557764
O75369	LVS[+80]PGSANETSSILVESVTR	1063.52	19319190	18280626	12628163		40998860	29206060		11826055	14010972
O75369	LVSPGS[+80]ANETSSILVESVTR	1063.52	20174166	21655200	12322093	34655804		29032812		11076658	8768925
B3KMU4	IPAKLS[+80]PTQLR	652.36			10371595	10081296	18076946	5452692
B3KMU4	VPGEQGS[+80]DEEHCK	776.293	20801148	19594564	19484436	22708626	19929706	17546436	23917320
B3KMU4	AGLAS[+80]PEEEDAVGKEPLK	960.454		13192497	3473294			15680703		2696248	243891
B3KMU4	QLLDS[+80]DEEQEEDEGR	936.363	264222080	285721888	307164864		234351600	233801120	144730064	187306512	154905968
O60832	AKAGLESGAEPGDGDS[+80]DTTK	993.42	1809345	4439822		54798
O60832	AGLES[+80]GAEPGDGDSDTTK	893.854	46382888	48773428	56590024	40640648	44325172	43147384	466125024	37803780	28278314
O60832	AGLESGAEPGDGDS[+80]DTTK	893.854	1153242112	1472238720	1562884608	1088428288	1182614144	1064071232	482384320	651998976	556210880
O60832	AGLES[+80]GAEPGDGDS[+80]DTTK	933.838	48664080	62921596	68322672	36548568	36696632	32192128	27957076	44091500	34568972
O60832	AGLESGAEPGDGDS[+80]DTTKK	957.902	425932896	425999168	472253408	414854784	401644736	346114208	156210896	195607168	157522768
O60832	AGLES[+80]GAEPGDGDS[+80]DTTKK	997.885	46955420	40429360	52613428	43912204	47439472	46262092	33164936	34259596	30086776
O60832	AGLESGAEPGDGDS[+80]DTTKKK	1021.95	40165424	42175440	47031440	27190564	21693262				227348
O60832	AKEVELVS[+80]E	542.252	314419808	352134688	339234144	218687488	253923936	214101600	70154912	103163136	78733160
O60832	EVELVS[+80]E	442.686	6580927	8745998					2947117	3160139	4399811
Q9H6F5	LGGLRPES[+80]PES[+80]LTSVSR	972.945	101489672	72229872	123500448	71924272	72475360	60228612	49109680	49838292	31029636
Q9H6F5	EPGS[+80]PPSVQR	567.253		9805570	38976340	22634472	56249616	74766008	20143772		45635696
Q9H6F5	AGLGS[+80]PERPPK	594.792	165665856	69328480		82450688	95198608	189911936
Q9H6F5	AGLGSPERPPKT[+80]SPGS[+80]PR	975.945	176788816	209703488	181310000	168215152		121551864	24087426	45195552	51702148
Q9H6F5	AGLGS[+80]PERPPKT[+80]SPGS[+80]PR	1015.93		143045232	161702128	69246752			34699216	92929672	53039760
Q9H6F5	AGLGS[+80]PERPPKTS[+80]PGS[+80]PR	1015.93		151893680	147448160	69884768			35294704	92038616	46814580
Q9H6F5	QPEYS[+80]PESPR	635.261	902059648	695422464	1262640640	929991168	937351360	837805056	487523456	580057024	333598848
Q9H6F5	QPEYSPES[+80]PR	635.261	759680000	710850560	1263392640	945098816	930933056	845412992	440702944	463466752	328649472
Q9H6F5	QPEY[+80]SPES[+80]PR	675.244
Q9H6F5	QPEYS[+80]PES[+80]PR	675.244
Q9BRQ0	AGLQMKS[+80]PEK	584.775	54117948		76586648	77203496	81136536	72450552	26989636	27923368	29872756
Q9BRQ0	GGGT[+80]PDANSLAPPGK	709.819	150631056	176428896		127095648	139234464	123761256	33611232	73966424	56959756
Q14692	AGLS[+80]PANCQSDR	678.274	44531896	45249588	49641780	43771804	1450655	4988888	22057686	26095134	25192110
Q9UQ35	S[+80]RST[+80]T[+80]PAPK	592.711	80415336			177495376					18214448
Q9UQ35	SRS[+80]T[+80]T[+80]PAPK	592.711	46758792			190093632		61658676		18962544
Q9UQ35	THTTALAGRS[+80]PS[+80]PASGR	913.901	1286508544	1366622592	1230971648	1256498688	1325565440	1146171776	300532512	352309280	311689184
Q9UQ35	SPS[+80]PASGR	419.676		7155749	14754297	1300776	6172202
Q9UQ35	S[+80]PS[+80]PASGR	459.66	10245893	5582556	5209583	1516988			11217481
Q9UQ35	QPSS[+80]PYEDKDK	687.285	136260336	145134992	140763184	169702912	169457872	107814368	167507104	230298160	184224656
Q9UQ35	QPSS[+80]PYEDKDKDK	808.846	17312140		26777498	35737660	37939532			29242220	11481547
Q9UQ35	EKS[+80]ATRPS[+80]PS[+80]PER	841.323	94975632	120777960	100420824	80995792	92138624	65453796	51273248	57929396	39744452
Q9UQ35	SATRPSPS[+80]PER	632.788		75946112				89563240	46856180	65766240	50781868
Q9UQ35	SAT[+80]RPSPS[+80]PER	672.771	3170777856	3648872192	3679301120	2477615104	3249047296	3008035584	1638418816	1969032320	1569750272
Q9UQ35	SATRPS[+80]PS[+80]PER	672.771	3687561728		2740003840	3088284160	3227134720	2927678208	1303567872	1965307904	1181869440
Q9UQ35	LPQSSSSESSPPS[+80]PQPTK	960.933			17817630	149795				14941262
Q9UQ35	HAS[+80]SSPES[+80]PKPAPAPGSHR	1028.94	12038506	27178332	30796650	28821970	39228112	29142708		13951340	7651988
Q9UQ35	HAS[+80]S[+80]S[+80]PESPKPAPAPGSHR	1068.92	51754808	32943138	44430504	40645620	37217104	31632758	15004444	13724933
Q9UQ35	EISSS[+80]PTSK	508.221	92090064	78842088	58476124		72818256	66777932		65316408
Q9UQ35	EIS[+80]SS[+80]PTSK	548.204	174113056	244019840		124344984		223987568		82697312	135292384
Q9UQ35	EISS[+80]S[+80]PTSK	548.204		301409600		114441648	410169376	188412624		86640928	133768112
Q9UQ35	S[+80]RS[+80]PQRPGWS[+80]R	777.294									37302104
Q9UQ35	S[+80]PQRPGWSR	575.761	33948436	43740232	31676812	34912680	34231732	29853740	36186160	45532416	30844132
Q9UQ35	S[+80]HS[+80]RS[+80]PATR	619.709	115193424	154430416		399998592	163262432	341598400	95591744	96012064	128483680
Q9UQ35	S[+80]HS[+80]RSPAT[+80]R	619.709	119935920	35025840	138827200	134851104	151809968	159207312	88379112	85651744	7096612
Q9UQ35	S[+80]HS[+80]RT[+80]PQR	604.704	19983442	20601478		27871086	23889984	33205464	25159848	32919970	30706770
Q9UQ35	RS[+80]LS[+80]GSSPCPK	668.262	43277832	39806540	42755020	51026736	53461424	42216364	19241188	30476098	23737304
Q9UQ35	RS[+80]LS[+80]GSS[+80]PCPK	708.245	234772048	206422896	173210704	228296224		198494672		96798056	76580328
Q9UQ35	SLSGSS[+80]PCPK	550.228	70467192	64882096	45555120	58838420	60121936	50989380	26727014	30585088	868091
Q9UQ35	S[+80]LS[+80]GSSPCPK	590.211		176519856	66936768		190048288		142221040	150775248	126345976
Q9UQ35	S[+80]LSGSS[+80]PCPK	590.211	194125024	205454032	233264384	168218336	136483872	189589664	29146108		36464416
Q9UQ35	SLS[+80]GSS[+80]PCPK	590.211	185682960	201483952	232820896	185208096	179114304	171908464		96614136	79453672
Q9UQ35	S[+80]LS[+80]GSS[+80]PCPK	630.194	209843104	158148208	389958592	348021664	384364864	294155104	168332304	174921952	187453408
Q9UQ35	SRSSSS[+80]PPPK	555.253	498322400	421113024	488858240	25199228	623437184		308228416	391712640	308019520
Q9UQ35	SRS[+80]SS[+80]SPPPK	595.236	54092016	22725872			6603577		11369366	17096542	13241798
Q9UQ35	VKSGT[+80]PPR	461.231	22549058	24930596	21893782	18587436			1428718
Q9UQ35	QGS[+80]ITSPQANEQSVTPQR	1004.46	78021272	108093816	126866152	117218096	105364024		73440208	99121376	85729392
Q9UQ35	QGSITS[+80]PQANEQSVTPQR	1004.46	100615136	73011240		100949256	90745064	51247228	62332216	99153104	73693608
Q9UQ35	QGSITSPQANEQSVT[+80]PQR	1004.46		66740668	58463124
Q9UQ35	QGSITS[+80]PQANEQSVT[+80]PQR	1044.44		31068174		63107052			128314000	129985152	162133808
Q9UQ35	QGSITSPQANEQS[+80]VTPQRR	1082.51	111226224	28619082	82487312		73873176	52795828	19600882	34552052
Q9UQ35	QGSITSPQANEQSVT[+80]PQRR	1082.51	92795416	29300294	84139968			57655564		32476736
Q9UQ35	SCFESS[+80]PDPELK	738.292	1733250688	1790835840	1800573440	1579397504	1729937152	1793209728	720453952	810785664	826870656
Q9UQ35	S[+80]CFESS[+80]PDPELK	778.275	70112480	74404560	65030188		78511064	68369272		44482652	36080824
Q9UQ35	SCFES[+80]S[+80]PDPELK	778.275		127075944	190311552	107963664	159035952	146981696		104930216
Q9UQ35	HSCSGSS[+80]PPR	576.219	1444978432	1814441472	1149471360	1013363648	1383192448	1275771008	433714784	860501824	624652416
Q9UQ35	SHS[+80]GSSSPSPSR	626.751									6272041
Q9UQ35	SRS[+80]VS[+80]PCSNVESR	812.813	255087680	228120272	226516064	216961712	233497632	203956992	107386080	115414800	98797472
Q9UQ35	S[+80]RS[+80]VS[+80]PCSNVESR	852.796	236158464	245963360	307354784	214554912	207002832		111387544	145858064	117500680
Q9UQ35	SVS[+80]PCSNVESR	651.263	100451160	102717232	99805000	74465456	74385232	95967928	36543100	37184152	31429600
Q9UQ35	S[+80]VS[+80]PCSNVESR	691.246	1011393920	1077251840	1085913728	910874880	1148947328	970917568	569825792	610815232	376717088
Q9UQ35	S[+80]VS[+80]PCS[+80]NVESR	731.23	16999626	5942975	20247644
Q9UQ35	YS[+80]HSGSSSPDTK	666.759	252087280	260524880	223144768	9601769	246957392	222066816	111760296	153745520	116734352
Q9UQ35	YSHS[+80]GSSSPDTK	666.759	251969360	257694912	223175840	234744160	243429664	219544976	111741312	153454336	116958376
Q9UQ35	YSHSGS[+80]SSPDTK	666.759	256898832	260809984	223727792	233934560	245311136	221554128	111557456	154930512	117100712
Q9UQ35	YSHSGSSS[+80]PDTK	666.759	253487376	260779760	218484352	215577632	240913344	220490736	95691896	147813952	103071720
Q9UQ35	YSHS[+80]GSSS[+80]PDTK	706.742	100172280	59538544	31882792	24080594					20905776
Q9UQ35	YSHSGSS[+80]S[+80]PDTK	706.742		61082408	32250280	25369646		22178234		10024140
Q9UQ35	VKPET[+80]PPR	502.252	77395520	69491056	55610548	73778864	84019160	67175128	42407160	62782220	48986424
Q9UQ35	QSHSGS[+80]ISPYPK	684.303	586469120	588806528	590488896	630866752	620007232	605050240	354580800	443205120	238490432
Q9UQ35	QSHSGSIS[+80]PYPK	684.303	507826304	584453824	592140224	637161216	615395072	600342720	353047584	441440448	231815152
Q9UQ35	QSHSGS[+80]IS[+80]PYPK	724.286		100130312	142176000		44781284	94283424
Q9UQ35	VKAQT[+80]PPGPSLSGSK	767.387	30077450						11782631		5797796
Q9UQ35	AQT[+80]PPGPSLSGSK	653.806	193921088	159770352	186333696	181713456	289996032	184035792	158797600	188396160	192581952
Q9UQ35	S[+80]PCPQEK	463.178	4685101	16550279		6614680		733216	16891346	32080924	15182724
Q9UQ35	SST[+80]PPGESYFGVSSLQLK	982.456	640391424	506387648	700337088	672561344	639194496	549327936	71072408	183243232	254713840
Q9UQ35	GQSQTS[+80]PDHR	596.741	73786912	182774336	75626952	132523608		107210496		14693218	39467988
Q9UQ35	SDTSS[+80]PEVR	529.214	99841632	89798840	90382704	118629632	125416336	110435776	49664508	63670260	52644712
Q9UQ35	SDTS[+80]S[+80]PEVR	569.197					10934462				55632
Q9UQ35	QSHSES[+80]PSLQSK	697.801	1667200384	1687863680	1673682432	1466333312	1368768640	1285233408	513272000	763495040	586291264
Q9UQ35	QS[+80]HSESPS[+80]LQSK	737.784	43839340		50149344		36304964
Q9UQ35	QSHS[+80]ES[+80]PSLQSK	737.784	47010504	51073436	52129572	41916508	40223964	27805836	17339726		18021208
Q9UQ35	S[+80]RS[+80]S[+80]SPVTELASR	808.81	418865824	379808928	532025760	436898816	521594208	452613888	409655840	510423872	460966016
Q9UQ35	SSS[+80]PVTELASR	607.277	233733232	250661424	265733136	256468720	275841600	262020544	205766752	237125408	224165840
Q9UQ35	S[+80]SS[+80]PVTELASR	647.26	206862688	313835136	313551200	251785056	276480832	254111920	250114048	321222944	267510096
Q9UQ35	SSS[+80]PVT[+80]ELASRSPIR	873.895	157729040	118535280	153663936	126851560	118194056	113357456		36057808	33612440
Q9UQ35	SSS[+80]PVTELASRS[+80]PIR	873.895	165745680	117529152	159144000	126582120	121645656	108978456	25652772	35841184	33717040
Q9UQ35	S[+80]S[+80]SPVTELASRS[+80]PIR	913.878			134504048	72098664			26704960	121464872	59895308
Q9UQ35	S[+80]PIRQDR	476.224				1196422	1222255616	1022583488
Q9UQ35	GEFSAS[+80]PMLK	573.749	442013056	374241504	357877600	425494144	448107648	427717536	159513472	172577456	163840784
Q9UQ35	GEFS[+80]AS[+80]PMLK	613.732			9800148	6447787	7384879				2193398
Q9UQ35	SGMS[+80]PEQSR	529.702	1304672256	1600789504	1230656640	1541138560	1541566336	1113161472	604835840	697051520	763023616
Q9UQ35	MALPPQEDAT[+80]ASPPR	830.874		24718554	816895488			64939004	131010152
Q9UQ35	MALPPQEDATAS[+80]PPR	830.874	274800064	158380816	239174944		242462400				152940224
Q9UQ35	MALPPQEDATAS[+80]PPRQK	958.95	20669360			2427164			42857	80777	61326
Q9UQ35	SEEPAGQILSHLS[+80]SELK	952.954	6109919		11685733		14361698	4068492	6543146
Q9UQ35	ELSNS[+80]PLR	498.232	220778864	243929520	247574240	245759968	290960416	259584864	249008592	294511936	245313872
Q9UQ35	ELS[+80]NS[+80]PLR	538.215	12754902	11274880	13345490	13563545			13916280	26977532
Q9UQ35	ENSFGS[+80]PLEFR	681.79	89364816	81605800	94430416	112484168	114369952	109633384	102252584	93749568	105589128
Q9UQ35	SSGHS[+80]SSELSPDAVEK	848.857	431559520	16435053	348830944			40627184	16120849	29545476
Q9UQ35	SSGHSSSELS[+80]PDAVEK	848.857	334053376	402843840	368084416			393257120	140163712	177522960	131654456
Q9UQ35	SSGHS[+80]SSELS[+80]PDAVEK	888.84		2864042	250345504	156240976	211606048	91647544	86045600	153467488
Q9UQ35	S[+80]S[+80]GHSSSELS[+80]PDAVEK	928.823				17304238					6997181
Q9UQ35	AGMSSNQSISS[+80]PVLDAVPR	998.464	377851232	323371264	327283456	411800864	362486560	361301760	331852416	286972256	236998768
Q9UQ35	AGMSSNQS[+80]ISS[+80]PVLDAVPR	1038.45	60739352	52164088	50825460	54295004	52318280	25586182	62930032	37960984	51756504
Q9UQ35	ERS[+80]SSASSPEMK	688.282						24661276	29921648
Q9UQ35	ERS[+80]SS[+80]ASSPEMK	728.265		65774064	51901956	82296528	87282808		7966934		63077372
Q9UQ35	ERS[+80]S[+80]SAS[+80]SPEMK	768.248	7189063			6460320					357169
Q9UQ35	ERS[+80]SSAS[+80]S[+80]PEMK	768.248				5960137
Q9UQ35	SSS[+80]ASSPEMK	545.71	147399472	145636784	150429568	170201680	192613536	154034928	79913832	134055120	88228992
Q9UQ35	SSS[+80]ASS[+80]PEMK	585.693
Q9UQ35	DGLPRT[+80]PSR	539.756	356993504	391314144	224903760	527822240	270517376	523588800	377882080	353556832	313818304
Q9UQ35	SRS[+80]GSS[+80]PGLR	582.234	75610464	65295800	81024224	95445336	91791544	89052832	16054485	21243376	26587840
Q9UQ35	S[+80]RSGS[+80]S[+80]PGLR	622.217				105858424				32591056	42132272
Q9UQ35	S[+80]GSSPGLR	420.684	34990960	38749636		41726036	21769236	37807928	13251027		14162668
Q9UQ35	SGS[+80]SPGLR	420.684	35847496	47728468	40735664	41258264	48313088	37749344	32589138	46661604	11741821
Q9UQ35	SGSS[+80]PGLR	420.684	134575824	147258928	138180496	58335576	62123980	56440776		41093048	34393192
Q9UQ35	SGS[+80]S[+80]PGLR	460.667				185175264		180111456
Q9UQ35	HSLSGS[+80]SPGMK	584.247	260623552	216578224	287292288	196420992	172983920	228676560	120494928	152359136	70113400
Q9UQ35	DIPRT[+80]PSR	511.245	171516800	178805728	173931328	245755024			146094768	176432752	152941008
Q9UQ35	GRS[+80]ECDSSPEPK	714.777	152626560	8247639	155474240	104038272	31104750	26480534	34357748	15072344	11544863
Q9UQ35	GRSECDSS[+80]PEPK	714.777	152618944		151845888	109056064	127421032	111483904	1082412	3353135	3474782
Q9UQ35	GRS[+80]ECDSS[+80]PEPK	754.76	38230544	39102316	44587528	85811816	85751392	82036568	76081096	44636268	32549652
Q9UQ35	GRSECDS[+80]S[+80]PEPK	754.76	307218176	351369536	288535008	196983184	624925	204014832	52900772	89751848	86851848
Q9UQ35	GRS[+80]ECDS[+80]S[+80]PEPK	794.743	501243424	482972960	414988384	510532384	536743296	466636128	207765872	271307840	218695232
Q9UQ35	SECDSS[+80]PEPK	608.215	172512400	188301952		121955760	98497336	109640184	57734136	86666728	75891736
Q9UQ35	SECDS[+80]S[+80]PEPK	648.199	185232736	194624528		118645528		114533144			36417408
Q9UQ35	ALPQT[+80]PRPR	558.29		184973744	193620512		220546016	182348112	66439376	68914032	82168624
Q9UQ35	SRS[+80]PSSPELNNK	698.317	61014708	67794952		22050350	46302956	43966340	30847376	36168088	27284356
Q9UQ35	S[+80]RS[+80]PSSPELNNK	738.3	210727952	211858640	218629072	157093488	158432672	125153784	118724248	122993200	108459240
Q9UQ35	SRS[+80]PSS[+80]PELNNK	738.3		48199728	45102892	19760974			101294752	17821560	11810458
Q9UQ35	S[+80]RS[+80]PSS[+80]PELNNK	778.283	859857536	786336512	822846528	605080448	753601728	637578688	305625728	411662464	406001184
Q9UQ35	ERSGS[+80]ESSVDQK	694.788	13253911	16847962	13513689	5632654	14652885	5377630	6993461	9595830	7167102
Q9UQ35	ERS[+80]GS[+80]ES[+80]SVDQK	774.754				5417288
Q9UQ35	ERS[+80]GS[+80]ESS[+80]VDQK	774.754
Q9UQ35	ERS[+80]GSES[+80]S[+80]VDQK	774.754
Q9UQ35	SGS[+80]ESSVDQK	552.216	1042036	18590266		8759276		1284407		1691370	3250816
Q9UQ35	SGS[+80]SQELDVKPSASPQER	991.447	167192496		111726656	89662880	78907192	82699744	29746722	64220592	56008392
Q9UQ35	SGSSQELDVKPSAS[+80]PQER	991.447		18195374	19805784				29840226	9856175	33325486
Q9UQ35	S[+80]GSSQELDVKPSAS[+80]PQER	1031.43	51388760	47718796	62641004	56594824		68719352	3424707
Q9UQ35	SGSS[+80]QELDVKPSAS[+80]PQER	1031.43	49800332	21179962	74422832			34092044
Q9UQ35	S[+80]RSGS[+80]SPEVDSK	698.263	27787558	34893812				10671956			6732025
Q9UQ35	SRSGS[+80]S[+80]PEVDSK	698.263		8186271
Q9UQ35	SGSS[+80]PEVK	435.684					25758376		8660817
Q9UQ35	SGS[+80]S[+80]PEVK	475.667			955306			3720426		2003890
Q9UQ35	SGS[+80]S[+80]PEVKDKPR	723.805			44972744		188900128	48573848	95549392	172318256
Q9UQ35	S[+80]GS[+80]S[+80]PEVKDKPR	763.788	115218400	138663088	120658080	113187392	107445312	86286288
Q9UQ35	AQSGS[+80]DSSPEPK	635.253		8188111	4502032		4522992	321666272	558602	228895968	2574951
Q9UQ35	AQSGSDSS[+80]PEPK	635.253			1354684				730979	1387129
Q9UQ35	GPS[+80]PEGSSSTESSPEHPPK	987.41		4349486	4600397				582924		2875278
Q9UQ35	RGS[+80]RSS[+80]PEPK	630.76	1285970560	1661932288	510314592	4477706	1156009216	2068467840	325199008	619421184	440735
Q9UQ35	RGSRS[+80]S[+80]PEPK	630.76	1548930944	921050752	557495040	936318720	47632276	2102206976	252645312	364516224	203195632
Q9UQ35	RGS[+80]RS[+80]S[+80]PEPK	670.743	295076960	241231472	404688384	366635008	231048656	305609984	101893592		138503232
Q9UQ35	T[+80]KSRT[+80]PPR	551.744	482642688	548165888	388740992	393924704	409409600			225493280	147885872
Q9UQ35	TKS[+80]RT[+80]PPR	551.744	482642688		388740992		409409600		132632408	223927184
Q9UQ35	RSS[+80]RSS[+80]PELTR	718.308	27126896	471959552	456878560			303269472	196005072	234758080	172441232
Q9UQ35	RSS[+80]RS[+80]S[+80]PELTR	758.291	246042096	262020000	216541504	234539552	169786368	207321056	98614912	141053984	111147848
Q9UQ35	S[+80]SPELTR	435.192	103391136	115226592	102370056	51707600	53250272	53900048	40105504	56106132	13422407
Q9UQ35	SS[+80]PELTR	435.192	75443816	114477416	103769176	48496372	50582000	52406132	41724848	54361972	45226544
Q9UQ35	RGRS[+80]PS[+80]PKPR	649.3	394062720		379505792		297226624	261990000			68488904
Q9UQ35	GRS[+80]PS[+80]PKPR	571.249	622206336	628083008	523656992	541024704	570276032	487947392	226106624	278364992	247523472
Q9UQ35	S[+80]PS[+80]PKPR	464.688	14827892				23475678		16221663	76401240
Q9UQ35	RGGS[+80]GY[+80]HSRS[+80]PAR	814.3	456264928	461290272	437478176	442670624	5717658	374216768		192553232	140223488
Q9UQ35	GGSGYHS[+80]RS[+80]PAR	696.266	138961920	141571392	121573360	95348944	91705496	81656720	37792584	52444316	42105828
Q9UQ35	GGS[+80]GYHS[+80]RS[+80]PAR	736.249	771795136	558004736	626591232	794971968	820606144	709414848	289301056	382230368	295371584
Q9UQ35	GRS[+80]RT[+80]PPTSR	637.774	422514528	1092110208	687897216	476888512	541387648	516587840	168227248	339710240	230847056
Q9UQ35	GRS[+80]RTPPT[+80]SR	637.774	205144240	749655168	652505216	359311040	512309600			290975104	166569056
Q9UQ35	SRTPPT[+80]S[+80]R	531.212		22513540	194942976	156730256			1257147	88662568
Q9UQ35	SRTS[+80]PAPWK	555.261		45029232	55008932				23977128		26454910
Q9UQ35	TS[+80]PAPWK	433.694	21317000	21158198	24811888	28783834	26615690	27430792	17703946	25919586	20521244
Q9UQ35	S[+80]RS[+80]RAS[+80]PATHR	733.279	1439370624	1487869568	1099106816	1145459968	1203812608	1059089024	439840960	596562816
Q9UQ35	S[+80]RS[+80]RASPAT[+80]HR	733.279	1485113216	1377260288	1123243392	1135525248	1143615232	1069171072	464002368	656170368	397786848
Q9UQ35	S[+80]RAS[+80]PATHR	571.729	115384880	177244624	215176480	202176608	137462320	179721808	57165256	80120016	62950956
Q9UQ35	S[+80]RTS[+80]PVSR	525.212	1281910912	1593716480	1405596672	985518464	1258121984	1151398912	700027200	906566656	818781760
Q9UQ35	S[+80]RTS[+80]VTR	483.694					376045376	332195488	328590688
Q9UQ35	SRAS[+80]PVSR	470.224	138519344		156440512	237670416	171796144	170263776	61214796	82637704	69191856
Q9UQ35	S[+80]RAS[+80]PVSR	510.207	1424669440	912809152	1293591808	1133928960	955227712	1045777408	495178592	429712960	774803136
Q9UQ35	S[+80]RT[+80]PTTR	489.694	436431392	439267520	847657024	153699200	79727712	487242080	102858304	207385360	307041664
Q9UQ35	SRTS[+80]PITR	499.245	64671124	66486972	77425624	91032224	84695352	76397888	32777354	43527652	35333536
Q9UQ35	SRTS[+80]PVTR	492.237	330992192	364695936	328093600	358264128	341499744	332455712	152149616	191519200	136640896
Q9UQ35	S[+80]RT[+80]S[+80]PVTR	572.203			30422948			184936
Q9UQ35	S[+80]RT[+80]PLLPR	550.257	2529427712	2334774784	2599981312	2010807296	2173095936	1954391040	1183381120	1599005568	1455792640
Q9UQ35	S[+80]RS[+80]PLAIR	530.241	3730952704	3657562368	3561496320	3269820928	3070278656	3036376320	822731904	1696763776	1406215680
Q9UQ35	S[+80]AT[+80]PPATR	480.683		593546				9774241		22249224
Q9UQ35	NHS[+80]GSRT[+80]PPVALNSSR	920.399	94006328	96379808	91449224	43716828	93077880	75144368	26421848	28716600	27648168
Q9UQ35	NHS[+80]GS[+80]RT[+80]PPVALNSSR	960.382	635371456	481121312	705679360	632239680	671883584	566199232	182633488	217591856	263018848
Q9UQ35	T[+80]PPVALNSSR	561.271	101993936	89466712	105310416	112788288	76795984	72456752	75602784	131672448	103894040
Q9UQ35	MSCFS[+80]RPSMS[+80]PTPLDR	1014.89		1332316160	1310072192	1024680256	818197824	806638080		311858944
Q9UQ35	MSCFSRPS[+80]MS[+80]PTPLDR	1014.89	1620316288	1335824768	1237715840	1015775680	750622720	808600896	343548128	315957024	301004736
Q9UQ35	CRS[+80]PGMLEPLGSSR	813.86	600535808	589785920	613977024	570597952	569176640	411178304	198460736	252553328	225542400
Q9UQ35	S[+80]PGMLEPLGSSR	655.794	72129104	74687728	80365760	66457268	55735740	64049176	56973536	68125632	57315748
Q9UQ35	TPAAAAAMNLAS[+80]PR	711.334	417895488	512720448	459137856	798371200	869088576	886188672	160884960	151991024	184832320
Q9UQ35	T[+80]PTAPAVNLAGAR	659.829	86573496	37586600		94003512	76744672	107766416	41769748	33999984	44722992
Q9UQ35	T[+80]PQAPASANLVGPR	729.859				7326226			7944178	11289388	5985087
Q9UQ35	S[+80]AHATAPVNIAGSR	716.341	3738311	7885709	11919394	15953329	24816476	19540640	3134627
Q9UQ35	MAPALSGANLTS[+80]PR	733.347	261703120	261320688	217966224	321025760	383196960	395228448	81644848	114729384	117860472
Q9UQ35	TS[+80]PPLLDR	489.736	1540328704		1688873472	1610751616	1689727488	1575124224	652086592	1011543040	838840512
Q9UQ35	ARS[+80]RTPPS[+80]APSQSR	829.364	524143392	370723008	320085696	352780032	304938144	328028512	150990464	232111888	136149840
Q9UQ35	S[+80]RTPPSAPSQSR	675.812	222948816	271429536	226542448	270263296	278001728	246391872	59799208	109775160	73621568
Q9UQ35	SRT[+80]PPSAPSQSR	675.812	226874288	273579072	226154736	269471072	276051168	242266720	76236088	110440776	74553912
Q9UQ35	S[+80]RT[+80]PPSAPSQSR	715.795	353971392	296527424	336531328	285279584	279244224		100205144	253752128	113813944
Q9UQ35	S[+80]PVPSAFSDQSR	679.293	150060016	137180528	121142504	130110584	140897440	127763664	100062096	157966544	144993888
Q9UQ35	RVPS[+80]PTPAPK	565.292	515331840	570890688	449173952		255242992		183047264	159740048
Q9UQ35	VPS[+80]PTPAPK	487.241		30341306	271141504	76569056	27748500	27280224			55778484
Q9UQ35	EGRPPEPT[+80]PAK	629.795	24930530			8723050		18190546			4875349
Q9UQ35	EGRPPEPT[+80]PAKR	707.846	4792480
Q9UQ35	KPIDSLRDS[+80]R	633.814	24114644	19683050		23366788	22203334	22795988	16849586	23049710	22499406
Q9UQ35	DSRS[+80]LSY[+80]S[+80]PVER	818.296	56964980	18188422				32950504
Q9UQ35	SLS[+80]YSPVER	559.25	43378296	44649372	49435144	50982752	50330428	47109008	37502800	51157980	43311936
Q9UQ35	S[+80]LS[+80]YSPVER	599.233	9282060	7168082	10305153	8943319	9619986		4817531	5946402	159592304
Q9UQ35	S[+80]LSYS[+80]PVER	599.233	337520672	340474688	438795776	275840960	294051968	272912256	119282544	190052208	160786832
Q9UQ35	SLS[+80]YS[+80]PVER	599.233	334929120	344666560	447669888	276251648	295294400		118659328	184193824	160503824
Q9UQ35	S[+80]LS[+80]YS[+80]PVER	639.216	234232608	293653920	324711424	201434672	226519104	186442256	89566272	144178064	122429104
Q9UQ35	RRPS[+80]PQPSPR	629.314				148521744	211414752		93101488	101521848	77900912
Q9UQ35	RRPS[+80]PQPS[+80]PR	669.297	613829120	680612608	621058816	839356608	795262912	744335168	318834624	430166272	233398928
Q9UQ35	RPS[+80]PQPSPR	551.264		244088528	187008688	54134296	97860920	24666922	25548074	29746924	41786224
Q9UQ35	RPSPQPS[+80]PR	551.264	39795784	57960804		17225562		21551004	65452056		28237532
Q9UQ35	RPS[+80]PQPS[+80]PR	591.247		44296996	66520200	42359804			6706394
Q7Z434	GPVS[+80]PSVSFQPLAR	761.377	33003696	31118730	38694968	91435504	94373248	85177216	49509552	46341016	44036920
A8KAK5	KLS[+80]DDPCPVESK	727.815				42761016	50209200	44269424	25001934	29125804	26218712
A8KAK5	AGNWPGS[+80]PQVSGPS[+80]PAAR	948.395							88892		11549286
Q8WUF5	SES[+80]APTLHPYSPLSPK	895.922		29270406	33176076	41436504	41051256	40136140	16446722	14923686
Q8WUF5	S[+80]ESAPTLHPYSPLS[+80]PK	935.905	13904576	4564997			1455823			6926213	2096959
B3KY29	AGPVS[+80]PGCVK	526.236	9513065	16540176	17037344		52842876	52243048	20609166	38509132	23677822
Q99549	RLS[+80]GEER	463.708				600678016	286840448	313129536	168670480	290391104	172031712
Q99549	GLWSTDS[+80]AEEDKETK	888.372		27535144		31060932		33802864	5786715	14502945	6115683
W0Z7M9	AYQDQIS[+80]PVPGAPK	775.866				19784998			14559148	18674056	22477622
W0Z7M9	AGSCCLS[+80]PGGR	601.228				24158744			20772220	22476166	20079568
Q9Y4F5	SQS[+80]FTHSPSGDPK	727.801	50706068		40335572	74217568	30939676	63487764	39761200	43288280
Q9Y4F5	GDRDES[+80]DDGGVAQR	778.802		791701	1502985	32499622	14054416			5599791
Q9Y4F5	EMS[+80]PS[+80]PPAAQDPGGTALVSAR	1099.96
Q9Y4F5	SNS[+80]LSTPRPTR	648.309								10664002	1007967
Q9Y4F5	AGS[+80]FTGTSDPEAAPAR	807.843		17805012		23048930	22746510	19485536	13514020	20263476	20365100
Q8NFC6	YYS[+80]DS[+80]DDELTVEQR	940.337	70323592	89975048	119940064	86714680	77787288	71026992	56973092	62458948	57344188
Q8NFC6	SS[+80]VDLEESSTK	631.263	32114908	30409594	53048912	94976792	46050708	80724952	36921356	19223268	31578668
Q8NFC6	RTS[+80]TPVIMEGVQEETDTR	1064.98	16325691		30296866	34797308	40331120	37750900	21610504	23113366	23315510
Q8NFC6	KLS[+80]VLGK	412.736	12492036	13023382	12820134	24844720	25598952	22920020	5372825	9422812	8461509
Q8NFC6	TKS[+80]LLEEK	514.257	11633656	12478337	12990048	27113022	29733550	27500158	11140215	12644105	11610453
Q8NFC6	RGS[+80]LSQEMAK	593.768	37679080					53109796	43298052	44715276	38268388
Q8NFC6	DKDVT[+80]LSPVK	591.294	63378508	58047332	63218424	82278736	83071424	76224448	29322280	50255636	43301152
[truncated: 5,487 more rows]

## Sheet: Table S3
UniProt ID	Peptide Modified Sequence	Precursor Mz	ControlDIA_1	ControlDIA_2	ControlDIA_3	5minDIA_1	5minDIA_2	5minDIA_3	20minDIA_1	20minDIA_2	20minDIA_3
[truncated: 1,469 more rows]
